# Supplementary material for: Oxygenated volatile organic compounds (VOCs) as significant but varied contributors to VOC emissions from vehicles
Source: Copernicus journal article supplement (doi:10.5194/acp-22-9703-2022), 2022-07-29
Supplement: Supplementary file 1 [file acp-22-9703-2022-supplement.zip]

Archive with 3 entries (3 files):
- acp-22-9703-2022-supplement-title-page.pdf
- Vehicle_PTR_SI_v31.pdf
- Vehicle_PTR_Table_SI_V31.xlsx
