# Supplementary material for: Oxygenated volatile organic compounds (VOCs) as significant but varied contributors to VOC emissions from vehicles
Source: Copernicus journal article supplement (doi:10.5194/acp-22-9703-2022), 2022-07-29
Supplement: Supplementary file 1 [file acp-22-9703-2022-supplement.zip › acp-22-9703-2022-supplement-title-page.pdf]

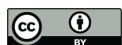

*Supplement of*

**Oxygenated volatile organic compounds (VOCs) as significant but varied contributors to VOC emissions from vehicles**

**Sihang Wang et al.**

*Correspondence to:* Bin Yuan (byuan@jnu.edu.cn) and Zibing Yuan (zibing@scut.edu.cn)

- acp-22-9703-2022-supplement-title-page.pdf
- Vehicle\_PTR\_SI\_v31.pdf
- Vehicle\_PTR\_Table\_SI\_V31.xlsx

The copyright of individual parts of the supplement might differ from the article licence.
