# Supplementary material for: Oxygenated volatile organic compounds (VOCs) as significant but varied contributors to VOC emissions from vehicles
Source: Copernicus journal article supplement (doi:10.5194/acp-22-9703-2022), 2022-07-29
Supplement: Supplementary file 1 [file acp-22-9703-2022-supplement.zip › Vehicle_PTR_SI_v31.pdf]

***Supplement for:***

**Oxygenated VOCs as significant but varied contributors  
to VOC emissions from vehicles**

Sihang Wang<sup>1,2</sup>, Bin Yuan<sup>1,2,\*</sup>, Caihong Wu<sup>1,2</sup>, Chaomin Wang<sup>1,2</sup>, Tiange Li<sup>1,2</sup>, Xianjun He<sup>1,2</sup>, Yibo Huangfu<sup>1,2</sup>, Jipeng Qi<sup>1,2</sup>, Xiao-Bing Li<sup>1,2</sup>, Qing'e Sha<sup>1,2</sup>, Manni Zhu<sup>1,2</sup>, Shengrong Lou<sup>3</sup>, Hongli Wang<sup>3</sup>, Thomas Karl<sup>4</sup>, Martin Graus<sup>4</sup>, Zibing Yuan<sup>5\*</sup>, Min Shao<sup>1,2</sup>

<sup>1</sup> Institute for Environmental and Climate Research, Jinan University, Guangzhou 511443, China

<sup>2</sup> Guangdong-Hongkong-Macau Joint Laboratory of Collaborative Innovation for Environmental Quality, Guangzhou 511443, China

<sup>3</sup> State Environmental Protection Key Laboratory of Formation and Prevention of Urban Air Pollution Complex, Shanghai Academy of Environmental Sciences, Shanghai 200233, China

<sup>4</sup> Department of Atmospheric and Cryospheric Sciences, University of Innsbruck, Innsbruck, Austria

<sup>5</sup> College of Environment and Energy, South China University of Technology, University Town, Guangzhou 510006, China

\*Correspondence to: Bin Yuan ([byuan@jnu.edu.cn](mailto:byuan@jnu.edu.cn)) and Zibing Yuan ([zibing@scut.edu.cn](mailto:zibing@scut.edu.cn))

## **Section 1. Supporting information for test vehicles in this study**

### **Chemical composition of gasoline and diesel fuel in China**

Fuel composition is one of the determining factor for VOCs emissions from vehicles (Gentner et al., 2017). The gasoline fuel used in China is mainly comprised of C<sub>4</sub>-C<sub>7</sub> hydrocarbons. The chemical compositions of gasoline fuel are alkanes (55%-62%), alkenes (12%-17%), aromatics (27%-32%), and methyl tert-butyl ether (MTBE, 1%-4%) (Tang et al., 2015;Sun et al., 2021;Qi et al., 2021;Huang et al., 2022). Heavy hydrocarbons, namely C<sub>8</sub>-C<sub>10</sub> alkanes and aromatics, contributed most in diesel fuel. The chemical compositions of diesel are alkanes (70%-79%), alkenes (1%-7%), and aromatics (21%-25%) (Wang et al., 2015;Yue et al., 2015;Hou and Jiang, 2018;Liu and Zhang, 2015). Gasoline and diesel fuel are summer blends, and the gasoline fuel does not contain ethanol in this study.

### **China VI emission standard in China**

The limits and measurement methods for emissions of light-duty vehicles (GB18352.6-2016; known as the China VI standard) have been recently introduced in China, which applies to light-duty vehicles using gasoline and diesel fuel. The China VI emission standard continued the EU standard system as the reference with various regulation details integrated from US emissions standards (Lyu et al., 2020). Vehicle emission limits are significantly lower for the China VI standard (Table S7, Table S8). For example, limits on gasoline vehicle exhaust emissions were tightened by 30 to 50% from China V to China VI, and a new particulate number (PN) limit was added in gasoline vehicles (Lyu et al., 2020).

### **Cold start in gasoline and diesel vehicles**

Cold start, which occurs after several hours of nonoperation for vehicles (Drozd et al., 2016), is a major source of emissions for gasoline vehicles and have greater emissions due to two issues: (1) low engine temperatures lead to incomplete combustion that allow non/partially combusted fuel compounds to exit engine cylinders. (2) Effective operation of the catalytic converter requires a warm-up period to reach

sufficient catalyst operating temperatures (Gentner et al., 2017; George et al., 2015). Due to diesel emissions have emphasized control of primary PM<sub>2.5</sub> and NO<sub>x</sub> emissions, the after-treatment devices of diesel vehicles (e.g. DOC, DPF, SCR etc.) do not aim for VOCs control.

## Section 2. Calculation of the emission factors and the emission ratios

Mileage-based emission factors (mg·km<sup>-1</sup>) are calculated using Equation (1)

$$EF_i = \frac{\sum C_i * DR_j * V_j}{1000 \sum L_j} \quad (1)$$

Where  $EF_i$  is the emission factor of VOC species  $i$ , mg·km<sup>-1</sup>;  $C_i$  is the concentration of VOC species  $i$ , µg·m<sup>-3</sup>;  $DR_j$  is the dilution ratio for the test vehicles  $j$ ;  $V_j$  is the exhaust flow rate for the test vehicles  $j$ , m<sup>3</sup>·s<sup>-1</sup>;  $L_j$  is the distance traveled by the test vehicles  $j$ , km. The mileage is based on the number of short transient driving cycles. The distance of a complete short transient driving cycle is 1.013 km.

Fuel-based emission factors (mg·kg<sub>fuel</sub><sup>-1</sup>) are calculated using a carbon mass balance approach: Equation (2)

$$EF_i = \frac{\sum C_i * C_F}{\left( \frac{\sum C_{CO_2}}{MW_{CO_2}} + \frac{\sum C_{CO}}{MW_{CO}} \right) * MW_C} \quad (2)$$

Where  $EF_i$  is the emission factor of VOC species  $i$ , mg·kg<sub>fuel</sub><sup>-1</sup>;  $C_i$ ,  $C_{CO_2}$ , and  $C_{CO}$  are the concentration of VOC species  $i$ , CO<sub>2</sub>, and CO, respectively, mg·m<sup>-3</sup>;  $C_F$  is the carbon mass fraction of the fuel, the value was 0.86 used here.  $MW_{CO_2}$ ,  $MW_{CO}$  and  $MW_C$  are the molecular weights of pollutant CO<sub>2</sub>, CO, and carbon, g·mol<sup>-1</sup>.

Emission ratios (ppb·ppm<sup>-1</sup>) are calculated using Equation (3)

$$ER_i = \frac{\sum C_i}{\sum C_{co}} \quad (3)$$

Where  $ER_i$  is the emission ratio of VOC species  $i$ , ppb·ppm<sup>-1</sup>;  $C_i$  and  $C_{co}$  are the concentration of VOC species  $i$  (ppb) and CO (ppm), respectively.

To calculate the weighted mean of the emission factors and emission ratios, we used the proportion of different standards in various types of gasoline and diesel vehicles, which reported in the China Mobile Source Environmental Management

Annual Report (MEEPRC, 2019). Reallocate the proportion based on vehicles which were tested in this study. The proportion of gasoline and diesel vehicles in this study as follows Table S1. And the value of them shown in the table.

### **Section 3. The limit of detection for the emission factors and the $C_{16}H_{22}O_4H$ ( $m/z=279$ ) in the mass spectrum**

The limit of detection are commonly defined as the concentrations where the ratio of signal-to-noise ratio (S/N) is 3 (Yuan et al., 2017). Here, the limit of detection for VOC mixing ratios were calculated and applied to estimate the limit of detection for emission factors. Averaged limit of detection for emission factors in various vehicles are shown in Fig. S12a-c. Due to some of the limit of detection for emission factors were higher than the emission factor in mass spectra according to Fig. 3. We choose a gasoline vehicle with China V emission standard to calculate the ratio of the emission factor to the limit of detection for emission factor. As shown in Fig. S12d, although some VOC species were lower than a ratio of 1 (means the emission factors were lower than the limit of detection), VOC species higher than a ratio of 1 contributed more than 90% of the total emission in mass spectra.

It should be noted that the signals of  $C_{16}H_{22}O_4H$  ( $m/z=279$ ) were higher during the tests based on determined emission factors. However, we suspect that it may be emitted artifacts from the sampling or dilution system as it mainly showed higher signals in the latter period of each test when sampling materials absorb more heat from vehicle exhausts (Fig. S13), and thus it is not included in Fig. 5.

### **Section 4. Calculation of the carbon oxidation states ( $\overline{OS}_C$ )**

The scatterplot of  $\overline{OS}_C$  as the function of carbon number, provides a framework for describing the bulk chemical properties and the evolution of organics (Kroll et al., 2011). The approximate  $\overline{OS}_C$  was calculated as Equation (4)

$$\overline{OS}_C = 2 \times \frac{O}{C} - \frac{H}{C} \quad (4)$$

For  $C_xH_yN_{1,2}O_z$  compounds, the influence of N is dependent on functional groups so we made several assumptions to classify them. (1) N-containing functional groups are nitro ( $-NO_2$ ) or nitrate ( $-NO_3$ ) in our case; (2) N-containing aromatics feature nitro moieties and N-containing aliphatic hydrocarbons feature nitrate moieties; (3) N-containing aromatics have 6-9 carbon atoms and less hydrogen atoms than aliphatic hydrocarbons with the same carbon atoms. This was not an absolutely right classification but at least it provided a rough separation between nitro compounds and nitrate compounds for most  $C_xH_yN_{1,2}O_z$  species. After the above step,  $3 \times \frac{N}{C}$  and  $5 \times \frac{N}{C}$  was minus from Equation (5) for nitro compounds and for nitrate compounds, respectively.

$$\overline{OS}_C = 2 \times \frac{O}{C} - \frac{H}{C} - (3 \text{ or } 5) \times \frac{N}{C} \quad (5)$$

## **Section 5. The feasibility of the $C_{14}$ aromatics/toluene ratio used as diagnostic for diesel versus gasoline vehicles**

It is necessary to consider the atmospheric lifetime of  $C_{14}$  aromatics and toluene for oxidation when used the  $C_{14}$  aromatics/toluene ratio as diagnostic for diesel versus gasoline vehicles. Here, we consider the change of  $C_{14}$  aromatics/toluene ratio with the OH reaction in the atmosphere (de Gouw et al., 2005):

$$\frac{[C_{14} \text{ aromatics}]}{[Toluene]} = ER \times \exp[-(k_{C_{14}} - k_{Toluene})[OH] \times t] \quad (6)$$

Where  $[C_{14} \text{ aromatics}]$  and  $[Toluene]$  are the concentrations of  $C_{14}$  aromatics and toluene, respectively.  $ER$  is the emission ratio of  $C_{14}$  aromatics versus toluene (1.42 in diesel vehicles and  $3.7E-4$  in gasoline vehicles).  $[OH]$  is the concentration of OH radicals ( $\text{mole} \cdot \text{cm}^{-3}$ ).  $k$  is the rate constant of the OH reaction with toluene ( $5.63 \times 10^{-12} \text{ cm}^3 \cdot \text{mole}^{-1} \cdot \text{s}^{-1}$ ) (Atkinson and Arey, 2003) and  $C_{14}$  aromatics, respectively.  $t$  is the photochemical age. Here, an averaged OH concentration in the PRD, China with  $1.5 \times 10^6 \text{ mole} \cdot \text{cm}^{-3}$  is used (Wang et al., 2020; Tan et al., 2019). The average rate constant for  $C_{14}$  aromatics has not been reported, so we assume a rate constant similar

to representative C<sub>12</sub> aromatics ( $1.33 \times 10^{-10} \text{ cm}^3 \cdot \text{mole}^{-1} \cdot \text{s}^{-1}$ ) (Alarcon et al., 2015; Berndt and Böge, 2001), which may be a little lower than the real value of C<sub>14</sub> aromatics rate constant.

Based on the Equation (6), the C<sub>14</sub> aromatics/toluene ratio emitted from diesel vehicles will be higher than emission ratio of gasoline vehicles for photochemical reactions shorter than 12 h. Therefore, the C<sub>14</sub> aromatics/toluene ratio could be applied to the ambient measurements in urban or downwind regions, especially for roadside measurements or tunnel study to distinguish the emission of diesel and gasoline vehicles. Therefore, we conclude that the C<sub>14</sub> aromatics/toluene ratio should be applied for distinguishing emissions of gasoline and diesel vehicles in ambient measurements of urban or downwind regions, especially for roadside measurements or tunnel study to distinguish the emission of diesel and gasoline vehicles.

## Section 6. The fractions of OVOCs in total VOC emissions

Combined with the measurements of other VOCs (Table. S4) from canisters measured by gas chromatography-mass spectrometer/flame ionization detector (GC-MS/FID), the fractions of OVOCs in total VOC emissions can be determined for different vehicles. Due to the emission factors of toluene from PTR-ToF-MS and the offline canister-GC-MS/FID were consistent, the VOCs/toluene ratio were used to evaluate the fractions of OVOCs in total VOC emissions, calculated as Equation (7)

$$Fraction_{OVOCs,i} = \frac{\frac{EF_{OVOCs,i}}{EF_{toluene,PTR}}}{\left( \frac{EF_{OVOCs,i}}{EF_{toluene,PTR}} + \frac{EF_{other\ VOC,i}}{EF_{toluene,GC}} \right)} * 100\% \quad (7)$$

Where  $Fraction_{OVOCs,i}$  is the fraction of OVOC species i;  $EF_{OVOCs,i}$ , and  $EF_{toluene,PTR}$  are the emission factors of OVOC species i and toluene measured by PTR-ToF-MS, and  $EF_{other\ VOC,i}$  and  $EF_{toluene,GC}$  are the emission factors of other VOC species i and toluene measured by offline canister-GC-MS/FID.

**Supplement tables**

**Table S1.** Vehicle distribution in terms of various vehicle types and emission standard used in calculation of weighted mean for emission factor (MEEPRC, 2019).

(a) Gasoline vehicles

| Emission standard | China I | China II | China III | China IV | China V/VI |
|-------------------|---------|----------|-----------|----------|------------|
| Proportion %      | 3       | 4.5      | 19.1      | 42.5     | 30.9       |

(b) Diesel vehicles

| Vehicle type      | LDDT |      |     | MDDT |     |     | HDDT |      |     | Bus |     |
|-------------------|------|------|-----|------|-----|-----|------|------|-----|-----|-----|
| Emission standard | III  | IV   | V   | III  | IV  | V   | III  | IV   | V   | III | IV  |
| Proportion %      | 23.1 | 17.5 | 7.4 | 2.8  | 2.2 | 0.9 | 15.7 | 11.9 | 5.0 | 6.5 | 7.0 |

**Table S2.** Detailed information of the test gasoline vehicles used in chassis dynamometer tests.

| Number | Fuel type | Vehicle type | Emission standard     | Model year | Odometer /km     | Displacement /ml |
|--------|-----------|--------------|-----------------------|------------|------------------|------------------|
| 1      | Gasoline  | LDGV         | China I               | 2001       | 210188           | 2500             |
| 2      |           |              |                       | 2002       | 171876           | 2300             |
| 3      |           |              |                       | 2003       | 344417           | 1800             |
| 4      |           |              | China II              | 2005       | 224329           | 3000             |
| 5      |           |              |                       | 2004       | 488319           | 3000             |
| 6      |           |              |                       | 2005       | N/A <sup>b</sup> | 1600             |
| 7      |           |              | China III             | 2009       | 136766           | 2000             |
| 8      |           |              |                       | 2010       | 112389           | 2300             |
| 9      |           |              |                       | 2010       | 194555           | 1591             |
| 10     |           |              | China IV              | N/A        | 109024           | 2384             |
| 11     |           |              |                       | 2014       | 155155           | 2500             |
| 12     |           |              |                       | 2011       | 59622            | 1200             |
| 13     |           |              | China V               | 2016       | 114690           | 1998             |
| 14     |           |              |                       | 2017       | 75064            | 2457             |
| 15     |           |              |                       | 2019       | 15382            | 1495             |
| 16     |           |              | China VI <sup>a</sup> | 2019       | 2479             | 1998             |
| 17     |           |              |                       | 2019       | 3121             | 1998             |
| 18     |           |              |                       | 2019       | 838              | 1998             |

<sup>a</sup>: China VI emission standard for the test gasoline vehicles is actually China VIa emission standard in this study. <sup>b</sup>: N/A stands for “not available”.

**Table S3.** Detailed information of the test diesel and LPG vehicles used in chassis dynamometer tests.

| Number | Fuel type | Vehicle type | Emission standard | Model year | Odometer /km | Displacement /ml |
|--------|-----------|--------------|-------------------|------------|--------------|------------------|
| 19     | Diesel    | LDDT         | China III         | 2013       | 39465        | 3800             |
| 20     |           |              |                   | 2013       | 173046       | 2800             |
| 21     |           |              |                   | 2012       | 370000       | 2800             |
| 22     |           |              | China IV          | N/A        | 53072        | 2800             |
| 23     |           |              |                   | 2016       | 157982       | 3800             |
| 24     |           |              |                   | 2013       | 166200       | 2800             |
| 25     |           |              |                   | 2018       | 12749        | 2800             |
| 26     |           |              | China V           | 2018       | 55358        | 2800             |
| 27     |           |              |                   | 2018       | 36336        | 3000             |
| 28     |           | MDDT         | China III         | 2013       | 128694       | 4752             |
| 29     |           |              | China IV          | 2016       | 178567       | 5900             |
| 30     |           |              | China V           | 2016       | 62952        | 3767             |
| 31     |           | HDDT         | China III         | 2013       | 450000       | 6618             |
| 32     |           |              | China IV          | N/A        | 175679       | 4040             |
| 33     |           |              | China V           | N/A        | 53949        | N/A              |
| 34     | LPG       | Bus          | China III         | 2012       | 800000       | 9726             |
| 35     |           |              | China IV          | 2015       | 155308       | 8424             |
| 36     |           | Taxi         | China IV          | 2013       | 383946       | 1800             |
| 37     |           |              | China V           | 2016       | 366037       | 1795             |
| 38     |           |              |                   | 2017       | 282809       | 1600             |

**Table S4.** Sensitivities of PTR-ToF-MS for various VOC species calibrated with standard gas and Liquid Calibration Unit (LCU).

| VOC species                                               | Ion formula                                                  | Sensitivity,<br>cps·ppb <sup>-1</sup> |
|-----------------------------------------------------------|--------------------------------------------------------------|---------------------------------------|
| Species calibrated with gas standard                      |                                                              |                                       |
| Formaldehyde                                              | CH <sub>2</sub> OH <sup>+</sup>                              | 1169.23                               |
| Methanol                                                  | CH <sub>4</sub> OH <sup>+</sup>                              | 1048.04                               |
| Acetonitrile                                              | C <sub>2</sub> H <sub>3</sub> NH <sup>+</sup>                | 3507.61                               |
| Acetaldehyde                                              | C <sub>2</sub> H <sub>4</sub> OH <sup>+</sup>                | 3297.24                               |
| Ethanol                                                   | C <sub>2</sub> H <sub>6</sub> OH <sup>+</sup>                | 118.69                                |
| Acrolein                                                  | C <sub>3</sub> H <sub>4</sub> OH <sup>+</sup>                | 3932.01                               |
| Acetone                                                   | C <sub>3</sub> H <sub>6</sub> OH <sup>+</sup>                | 4641.00                               |
| Furan                                                     | C <sub>4</sub> H <sub>4</sub> OH <sup>+</sup>                | 2745.69                               |
| Isoprene                                                  | C <sub>5</sub> H <sub>8</sub> H <sup>+</sup>                 | 2246.04                               |
| MVK                                                       | C <sub>4</sub> H <sub>6</sub> OH <sup>+</sup>                | 4349.71                               |
| MEK                                                       | C <sub>4</sub> H <sub>8</sub> OH <sup>+</sup>                | 4732.40                               |
| Benzene                                                   | C <sub>6</sub> H <sub>6</sub> H <sup>+</sup>                 | 3115.08                               |
| 2-Pentanone                                               | C <sub>5</sub> H <sub>10</sub> OH <sup>+</sup>               | 3846.20                               |
| Toluene                                                   | C <sub>7</sub> H <sub>8</sub> H <sup>+</sup>                 | 3888.95                               |
| Phenol                                                    | C <sub>6</sub> H <sub>6</sub> OH <sup>+</sup>                | 4617.76                               |
| Furfural                                                  | C <sub>5</sub> H <sub>4</sub> O <sub>2</sub> H <sup>+</sup>  | 8402.87                               |
| Methyl Isobutyl Ketone                                    | C <sub>6</sub> H <sub>12</sub> OH <sup>+</sup>               | 3207.56                               |
| Styrene                                                   | C <sub>8</sub> H <sub>8</sub> H <sup>+</sup>                 | 4825.33                               |
| o-Xylene                                                  | C <sub>8</sub> H <sub>10</sub> H <sup>+</sup>                | 4431.81                               |
| m-Cresol                                                  | C <sub>7</sub> H <sub>8</sub> OH <sup>+</sup>                | 5790.90                               |
| 1,2,4-Trimethylbenzene                                    | C <sub>9</sub> H <sub>12</sub> H <sup>+</sup>                | 4665.09                               |
| Naphthalene                                               | C <sub>10</sub> H <sub>8</sub> H <sup>+</sup>                | 6011.85                               |
| a-Pinene                                                  | C <sub>10</sub> H <sub>16</sub> H <sup>+</sup>               | 1985.46                               |
| Species calibrated with the Liquid Calibration Unit (LCU) |                                                              |                                       |
| Formic acid                                               | CH <sub>2</sub> O <sub>2</sub> H <sup>+</sup>                | 856.60                                |
| Acetic acid                                               | C <sub>2</sub> H <sub>4</sub> O <sub>2</sub> H <sup>+</sup>  | 1711.00                               |
| Propionic acid                                            | C <sub>3</sub> H <sub>6</sub> O <sub>2</sub> H <sup>+</sup>  | 2072.00                               |
| Butyric acid                                              | C <sub>4</sub> H <sub>8</sub> O <sub>2</sub> H <sup>+</sup>  | 2358.00                               |
| Pyrrole                                                   | C <sub>4</sub> H <sub>5</sub> NH <sup>+</sup>                | 3219.67                               |
| Formamide                                                 | CH <sub>3</sub> NOH <sup>+</sup>                             | 3252.52                               |
| Acetamide                                                 | C <sub>2</sub> H <sub>5</sub> NOH <sup>+</sup>               | 4522.49                               |
| Catechol                                                  | C <sub>6</sub> H <sub>6</sub> O <sub>2</sub> H <sup>+</sup>  | 1856.04                               |
| Guaiacol                                                  | C <sub>7</sub> H <sub>8</sub> O <sub>2</sub> H <sup>+</sup>  | 5461.15                               |
| 2-Nitrophenol                                             | C <sub>6</sub> H <sub>5</sub> NO <sub>3</sub> H <sup>+</sup> | 4075.26                               |
| 2-Nitro-p-Cresol                                          | C <sub>7</sub> H <sub>7</sub> NO <sub>3</sub> H <sup>+</sup> | 2129.25                               |

182 **Table S5.** VOCs list analysis by offline Canister-GC-MS/FID.

183

| Num                             | Species                 | Num                          | Species                | Num               | Species                   |
|---------------------------------|-------------------------|------------------------------|------------------------|-------------------|---------------------------|
| <b>Alkanes (29)</b>             |                         | 33                           | 1-Butene               | 64                | 1,1-Dichloroethene        |
| 1                               | Ethane                  | 34                           | Cis-2-Butene           | 65                | Cis-1,2-dichloroethylene  |
| 2                               | Propane                 | 35                           | Trans-2-butene         | 66                | Trans-1,2-Dichloroethene  |
| 3                               | n-Butane                | 36                           | Isoprene               | 67                | 1,1-Dichloroethane        |
| 4                               | i-Butane                | 37                           | 1-Pentene              | 68                | 1,2-Dichloroethane        |
| 5                               | Cyclopentane            | 38                           | Cis-2-pentene          | 69                | Vinyl-bromide             |
| 6                               | n-Pentane               | 39                           | Trans-2-pentene        | 70                | Cis-1,3-dichloropropene   |
| 7                               | i-Pentane               | 40                           | 1-Hexene               | 71                | Trans-1,3-dichloropropene |
| 8                               | Cyclohexane             | 41                           | Acetylene              | 72                | Chlorobenzene             |
| 9                               | Methyl-cyclopentane     | <b>Aromatics (16)</b>        |                        | 73                | 1,2-Dichloropropane       |
| 10                              | 2-Methylpentane         | 42                           | Benzene                | 74                | Chloroform                |
| 11                              | 3-Methylpentane         | 43                           | Toluene                | 75                | Freon-12                  |
| 12                              | 2,2-Dimethyl-butane     | 44                           | Styrene                | 76                | Benzyl Chloride           |
| 13                              | 2,3-Dimethylbutane      | 45                           | Ethylbenzene           | 77                | Trichloroethylene         |
| 14                              | n-Hexane                | 46                           | o-Xylene               | 78                | 1,1,1-Trichloroethane     |
| 15                              | Methyl-cyclohexane      | 47                           | m/p-Xylene             | 79                | 1,1,2-Trichloroethane     |
| 16                              | n-Heptane               | 48                           | n-Propylbenzene        | 80                | Freon-11                  |
| 17                              | 2-Methyl-hexane         | 49                           | i-Propylbenzene        | 81                | 1,2-Dichlorobenzene       |
| 18                              | 3-Methyl-hexane         | 50                           | o-Ethyltoluene         | 82                | 1,3-Dichlorobenzene       |
| 19                              | 2,3-Dimethyl-pentane    | 51                           | m-Ethyltoluene         | 83                | 1,4-Dichlorobenzene       |
| 20                              | 2,4-Dimethylpentane     | 52                           | p-Ethyltoluene         | 84                | Carbon Tetrachloride      |
| 21                              | 2,2,4-Trimethyl-pentane | 53                           | 1,2,3-Trimethylbenzene | 85                | Bromodichloromethane      |
| 22                              | 2,3,4-Trimethyl-pentane | 54                           | 1,2,4-Trimethylbenzene | 86                | Tetrachloroethylene       |
| 23                              | 2-Methyl-heptane        | 55                           | 1,3,5-Trimethylbenzene | 87                | 1,1,2,2-Tetrachloroethane |
| 24                              | 3-Methyl-heptane        | 56                           | m-Diethylbenzene       | 88                | Freon-114                 |
| 25                              | n-Octane                | 57                           | p-Diethylbenzene       | 89                | 1,2,4-Trichlorobenzene    |
| 26                              | n-Nonane                | <b>Halohydrocarbons (37)</b> |                        | 90                | Freon-113                 |
| 27                              | n-Decane                | 58                           | Chloromethane          | 91                | 1,2-Dibromoethane         |
| 28                              | n-Undecane              | 59                           | Vinyl-chloride         | 92                | Dibromochloromethane      |
| 29                              | n-Dodecane              | 60                           | Chloroethane           | 93                | Bromoform                 |
| <b>Alkenes and Alkynes (12)</b> |                         | 61                           | Allyl-chloride         | 94                | Hexachloro-1,3-butadiene  |
| 30                              | Ethylene                | 62                           | Methylene-chloride     | <b>Others (1)</b> |                           |
| 31                              | Propene                 | 63                           | Bromomethane           | 95                | Carbon Disulphide         |
| 32                              | 1,3-Butadiene           |                              |                        |                   |                           |

184

**Table S6.** The average emission factors of CO<sub>2</sub> in various kinds of vehicles.

| Fuel type | EF                                          | Arithmetic mean | Weighted mean  |
|-----------|---------------------------------------------|-----------------|----------------|
| Gasoline  | $\text{g}\cdot\text{km}^{-1}$               | $319.8\pm53.0$  | $286.9\pm58.2$ |
|           | $\text{g}\cdot\text{kg}_{\text{fuel}}^{-1}$ | $310.9\pm35.7$  | $310.3\pm35.5$ |
| Diesel    | $\text{g}\cdot\text{km}^{-1}$               | $444.8\pm80.0$  | $412.0\pm81.9$ |
|           | $\text{g}\cdot\text{kg}_{\text{fuel}}^{-1}$ | $313.2\pm9.26$  | $312.8\pm16.6$ |
| LPG       | $\text{g}\cdot\text{km}^{-1}$               | $335.4\pm45.3$  |                |
|           | $\text{g}\cdot\text{kg}_{\text{fuel}}^{-1}$ | $311.5\pm29.2$  |                |

188 **Table S7.** Vehicle emission standards from China I - ChinaVI for light-duty vehicles (Gas: Gasoline vehicles, Die: Diesel vehicles).

| Emission standard | Effective year | Vehicle category |    | Emission limits (mg·km <sup>-1</sup> ) |      |      |      |      |     |     |     |                  |     |     |     | PN (number·km <sup>-1</sup> ) |                    |
|-------------------|----------------|------------------|----|----------------------------------------|------|------|------|------|-----|-----|-----|------------------|-----|-----|-----|-------------------------------|--------------------|
|                   |                |                  |    | CO                                     |      | THC  |      | NMHC |     | NOx |     | N <sub>2</sub> O |     | PM  |     | Gas                           | Die                |
|                   |                |                  |    | Gas                                    | Die  | Gas  | Die  | Gas  | Die | Gas | Die | Gas              | Die | Gas | Die |                               |                    |
| China I           | 2001           | Cat1             | -  | 2720                                   | 2720 | 970  | 970  | -    | -   | -   | -   | -                | -   | -   | 140 | -                             | -                  |
|                   |                | I                |    | 2720                                   | 2720 | 970  | 970  | -    | -   | -   | -   | -                | -   | -   | 140 | -                             | -                  |
|                   |                | Cat2             | II | 5170                                   | 5170 | 1400 | 1400 | -    | -   | -   | -   | -                | -   | -   | 190 | -                             | -                  |
|                   |                | III              |    | 6900                                   | 6900 | 1700 | 1700 | -    | -   | -   | -   | -                | -   | -   | 250 | -                             | -                  |
| China II          | 2004           | Cat1             | -  | 2200                                   | 1000 | 500  | 700  | -    | -   | -   | -   | -                | -   | -   | 80  | -                             | -                  |
|                   |                | I                |    | 2200                                   | 1000 | 500  | 700  | -    | -   | -   | -   | -                | -   | -   | 80  | -                             | -                  |
|                   |                | Cat2             | II | 4000                                   | 1250 | 600  | 1000 | -    | -   | -   | -   | -                | -   | -   | 120 | -                             | -                  |
|                   |                | III              |    | 5000                                   | 1500 | 700  | 1200 | -    | -   | -   | -   | -                | -   | -   | 170 | -                             | -                  |
| China III         | 2009           | Cat1             | -  | 2300                                   | 640  | 200  | -    | -    | -   | 150 | 500 | -                | -   | -   | 50  | -                             | -                  |
|                   |                | I                |    | 2300                                   | 640  | 200  | -    | -    | -   | 150 | 500 | -                | -   | -   | 50  | -                             | -                  |
|                   |                | Cat2             | II | 4170                                   | 800  | 250  | -    | -    | -   | 180 | 650 | -                | -   | -   | 70  | -                             | -                  |
|                   |                | III              |    | 5220                                   | 950  | 290  | -    | -    | -   | 210 | 780 | -                | -   | -   | 100 | -                             | -                  |
| China IV          | 2013           | Cat1             | -  | 1000                                   | 500  | 100  | -    | -    | -   | 80  | 250 | -                | -   | -   | 25  | -                             | -                  |
|                   |                | I                |    | 1000                                   | 500  | 100  | -    | -    | -   | 80  | 250 | -                | -   | -   | 25  | -                             | -                  |
|                   |                | Cat2             | II | 1810                                   | 630  | 130  | -    | -    | -   | 100 | 330 | -                | -   | -   | 40  | -                             | -                  |
|                   |                | III              |    | 2270                                   | 740  | 160  | -    | -    | -   | 110 | 390 | -                | -   | -   | 60  | -                             | -                  |
| China V           | 2017           | Cat1             | -  | 1000                                   | 500  | 100  | -    | 68   | -   | 60  | 180 | -                | -   | 4.5 | 4.5 | -                             | 6×10 <sup>11</sup> |
|                   |                | I                |    | 1000                                   | 500  | 100  | -    | 68   | -   | 60  | 180 | -                | -   | 4.5 | 4.5 | -                             | 6×10 <sup>11</sup> |
|                   |                | Cat2             | II | 1810                                   | 630  | 130  | -    | 90   | -   | 75  | 265 | -                | -   | 4.5 | 4.5 | -                             | 6×10 <sup>11</sup> |
|                   |                | III              |    | 2270                                   | 740  | 160  | -    | 108  | -   | 82  | 280 | -                | -   | 4.5 | 4.5 | -                             | 6×10 <sup>11</sup> |
| China VI<br>a     | 2021           | Cat1             | -  | 700                                    |      | 100  |      | 68   |     | 60  |     | 20               |     | 4.5 |     |                               | 6×10 <sup>11</sup> |
|                   |                | I                |    | 700                                    |      | 100  |      | 68   |     | 60  |     | 20               |     | 4.5 |     |                               | 6×10 <sup>11</sup> |
|                   |                | Cat2             | II | 880                                    |      | 130  |      | 90   |     | 75  |     | 25               |     | 4.5 |     |                               | 6×10 <sup>11</sup> |
|                   |                | III              |    | 1000                                   |      | 160  |      | 108  |     | 82  |     | 30               |     | 4.5 |     |                               | 6×10 <sup>11</sup> |
| China VI<br>b     | 2023           | Cat1             | -  | 500                                    |      | 50   |      | 35   |     | 35  |     | 20               |     | 3   |     |                               | 6×10 <sup>11</sup> |
|                   |                | I                |    | 500                                    |      | 50   |      | 35   |     | 60  |     | 20               |     | 3   |     |                               | 6×10 <sup>11</sup> |
|                   |                | Cat2             | II | 630                                    |      | 65   |      | 45   |     | 45  |     | 25               |     | 3   |     |                               | 6×10 <sup>11</sup> |
|                   |                | III              |    | 720                                    |      | 80   |      | 55   |     | 50  |     | 30               |     | 3   |     |                               | 6×10 <sup>11</sup> |

189 Cat1: Passenger cars with no more than six seats and test mass (TM, kg) ≤2500; Cat2:Other light-duty vehicles, I: TM≤1305, II: 1305<TM≤ 1760, III: TM> 1760;

190 **Table S8.** Vehicle emission standards from China I - ChinaV for heavy-duty diesel engines (HDDE).

191

| Emission standard | Effective year | CO (g·kW·h <sup>-1</sup> ) | THC (g·kW·h <sup>-1</sup> ) | NMHC (g·kW·h <sup>-1</sup> ) | NOx (g·kW·h <sup>-1</sup> ) | PM (g·kW·h <sup>-1</sup> ) |
|-------------------|----------------|----------------------------|-----------------------------|------------------------------|-----------------------------|----------------------------|
| China I           | 2001           | 4.5                        | 1.1                         |                              | 8                           | 0.36                       |
| China II          | 2004           | 4                          | 1.1                         |                              | 7                           | 0.15                       |
| China III         | 2008           | 5.45                       |                             | 0.78                         | 5                           | 0.16                       |
| China IV          | 2015           | 4                          |                             | 0.55                         | 3.5                         | 0.03                       |
| China V           | 2017           | 4                          |                             | 0.55                         | 2                           | 0.03                       |

192

193 **Supplement figures**

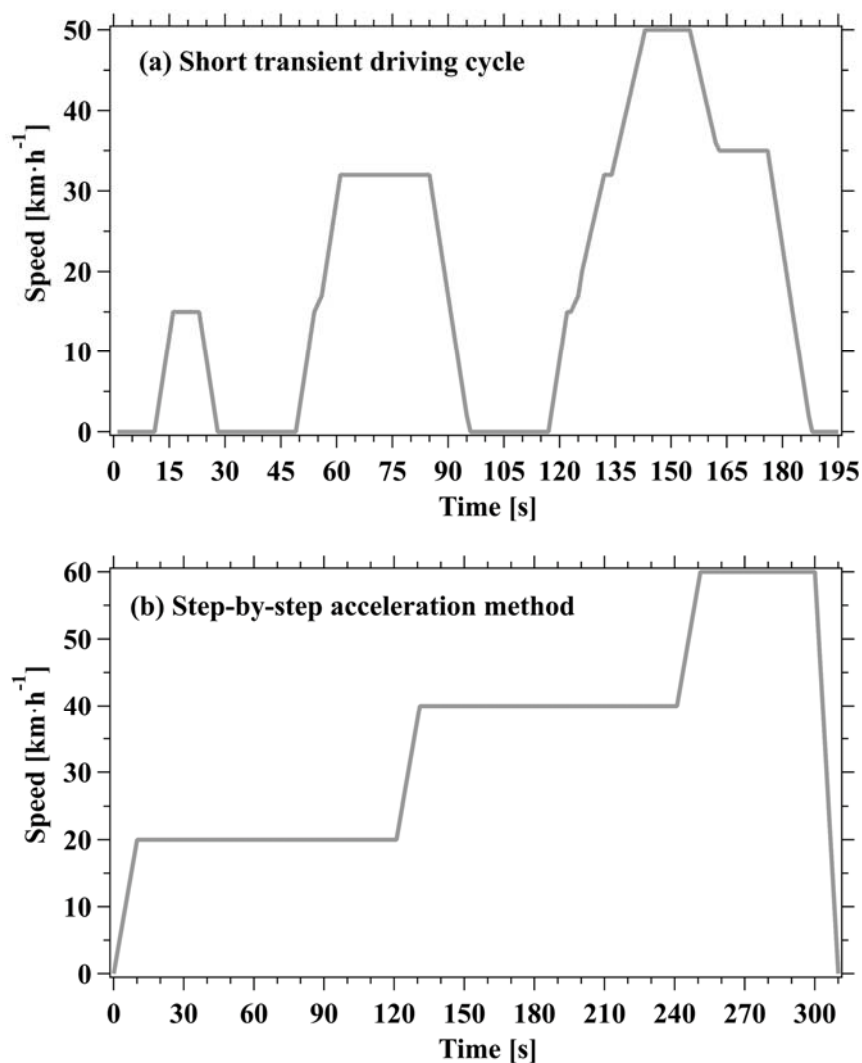

194  
195 **Figure S1.** Speed change of the test vehicles in (a) the short transient driving cycle (GB  
196 18285-2018) and (b) the step-by step acceleration method.

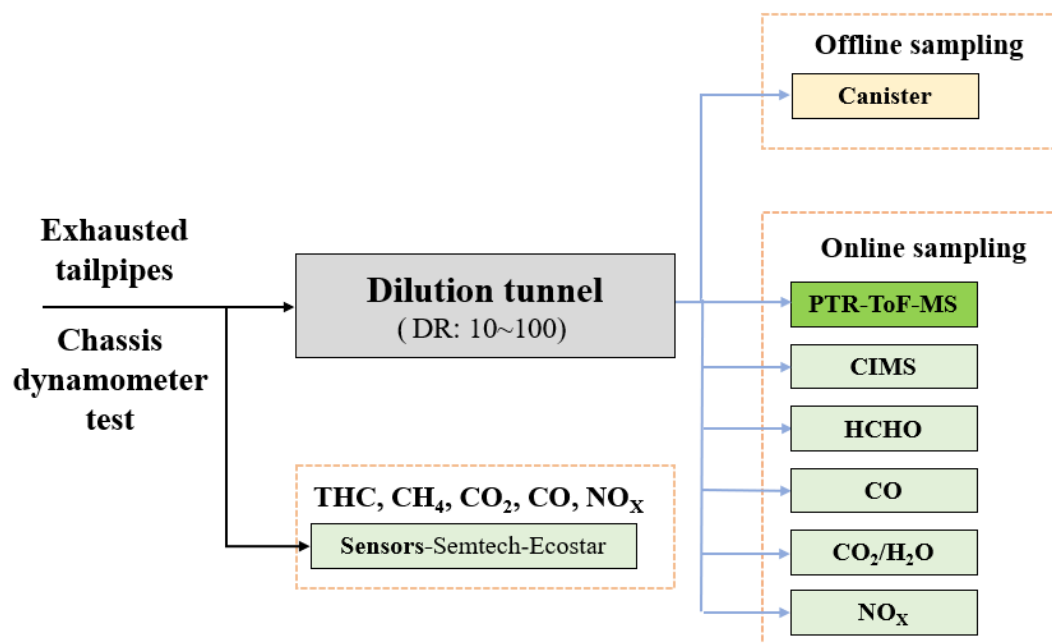

**Figure S2.** Diagram of the test setup used in the experiments including dilution system and instrumentation.

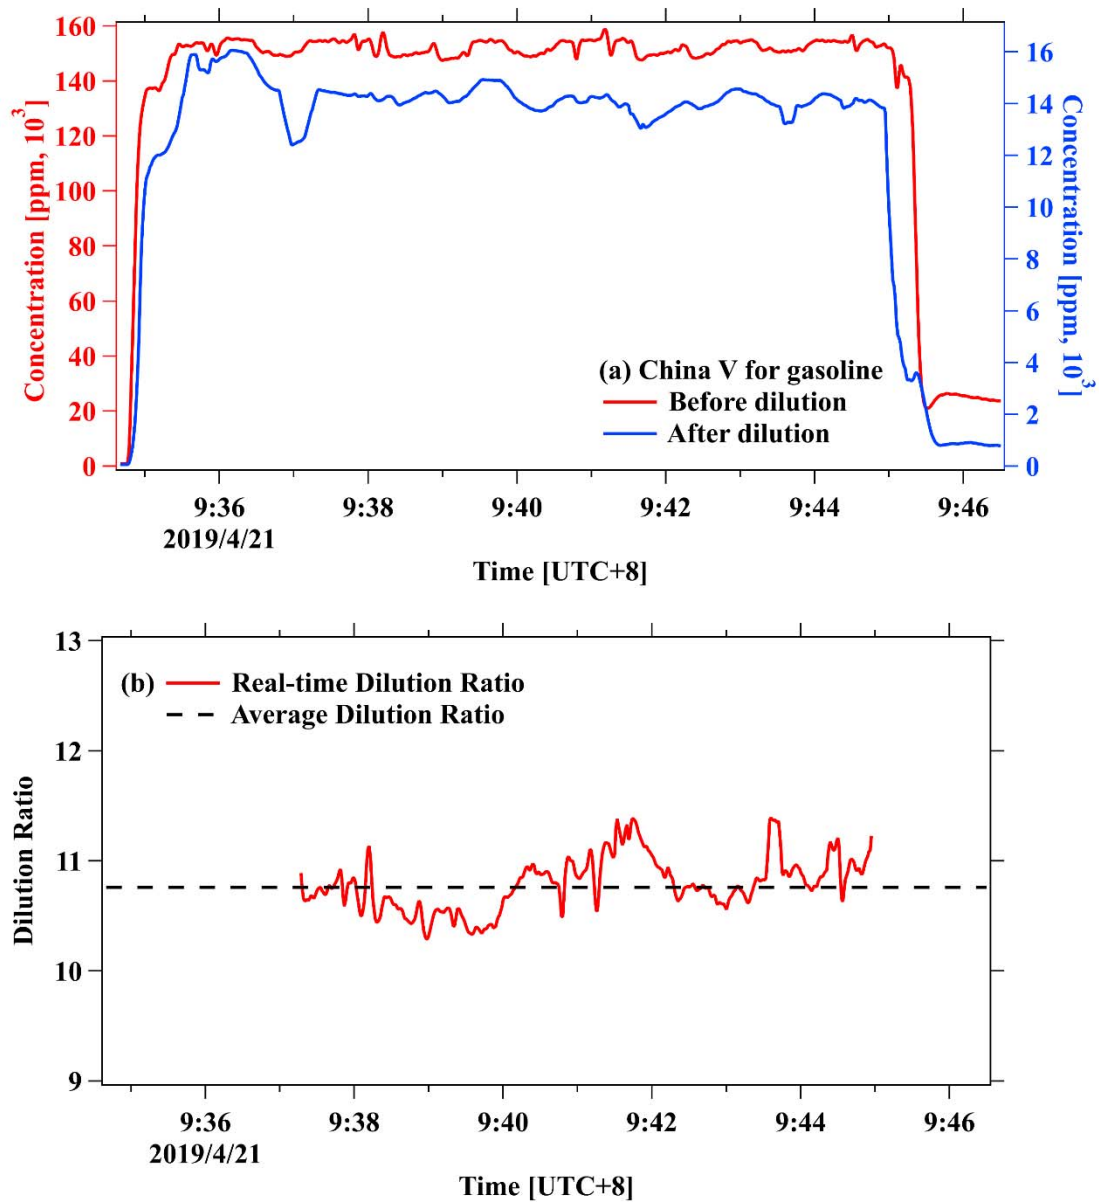

**Figure S3.** (a) Compared the concentration of CO<sub>2</sub> before and after dilution for a gasoline vehicle with the emission standard of China V. (b) Time series of real-time dilution ratio calculated by the concentration of CO<sub>2</sub>, and the dashed line is average dilution ratio.

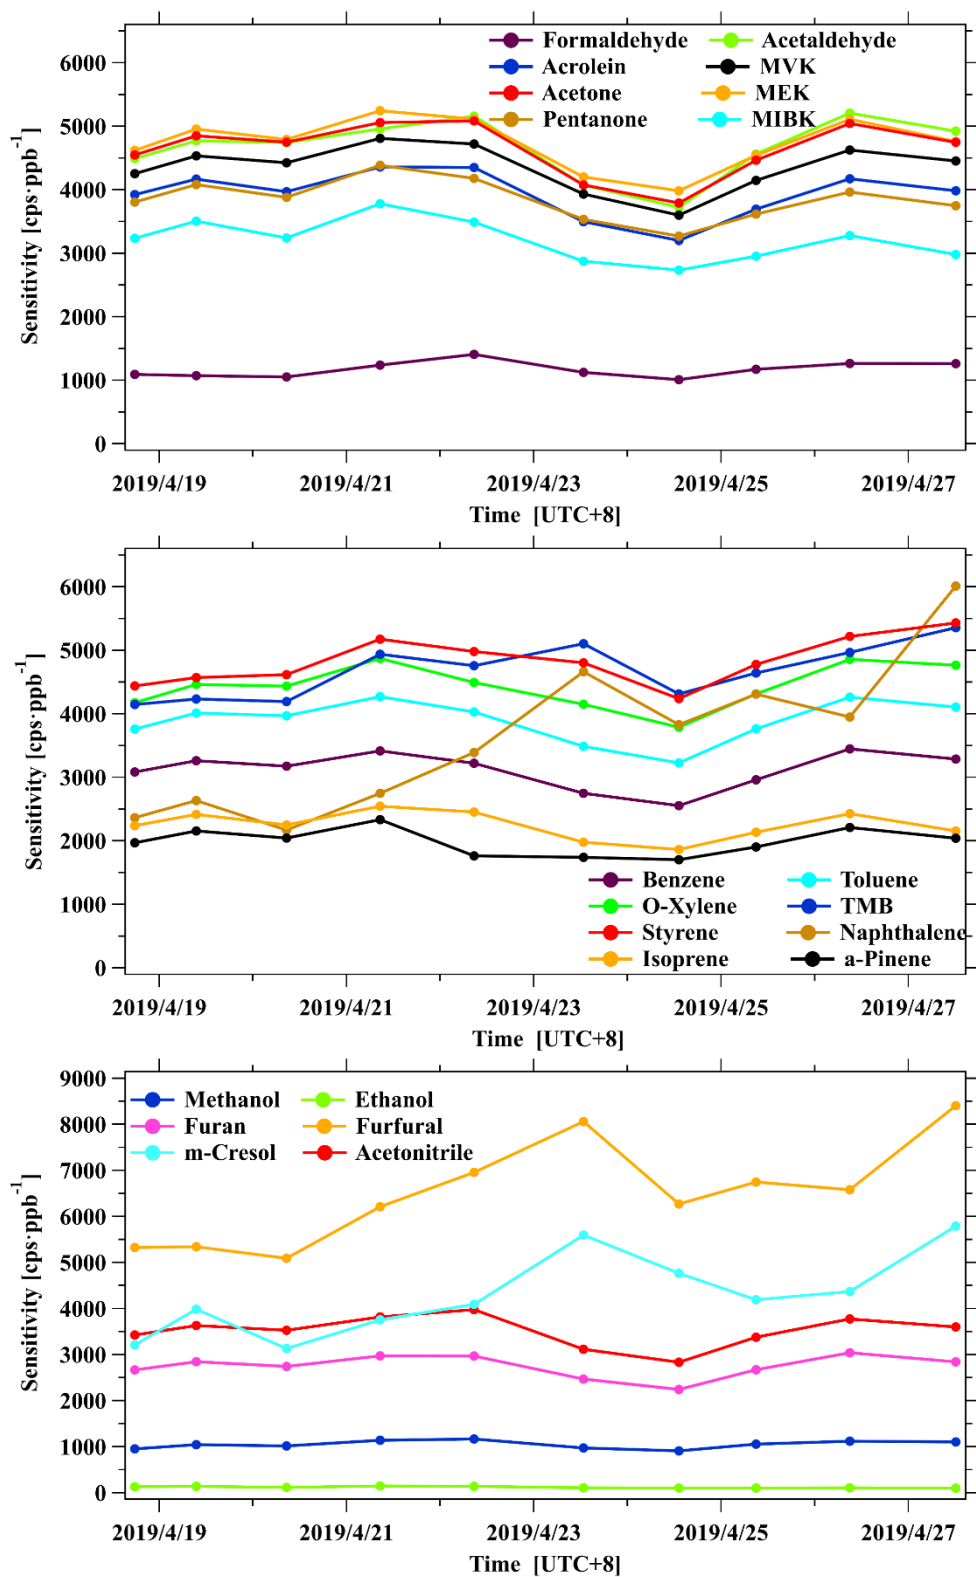

**Figure S4.** Calibration results of PTR-ToF-MS for different species during the campaign.

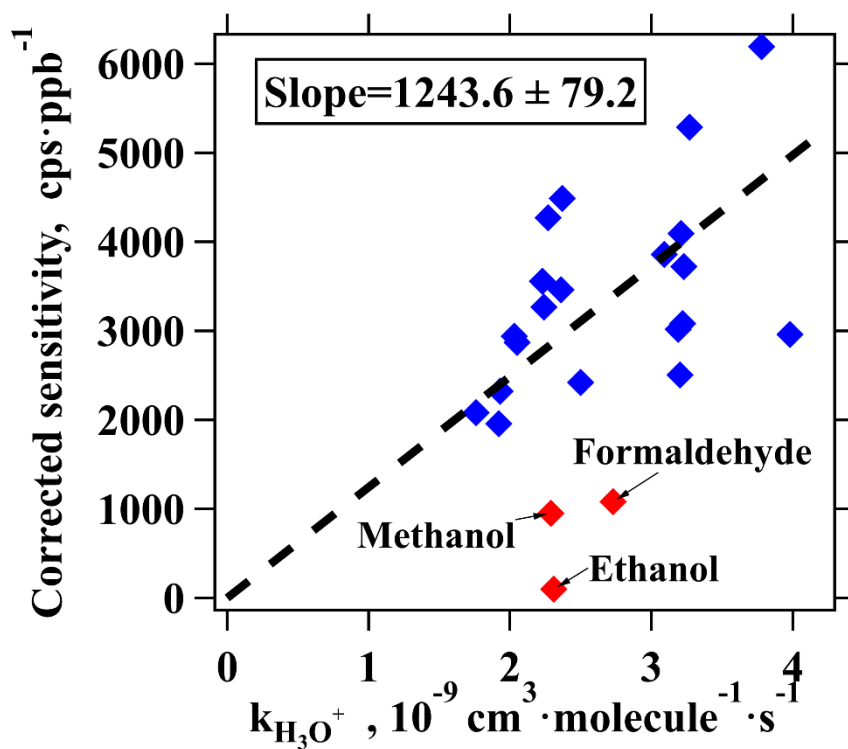

**Figure S5.** Corrected sensitivities as a function of kinetic rate constants for proton-transfer reactions of  $\text{H}_3\text{O}^+$  with VOCs. The dashed line indicates the fitted line for blue points. The red points are not used, as these compounds (formaldehyde, methanol, ethanol) are known to have lower sensitivities.

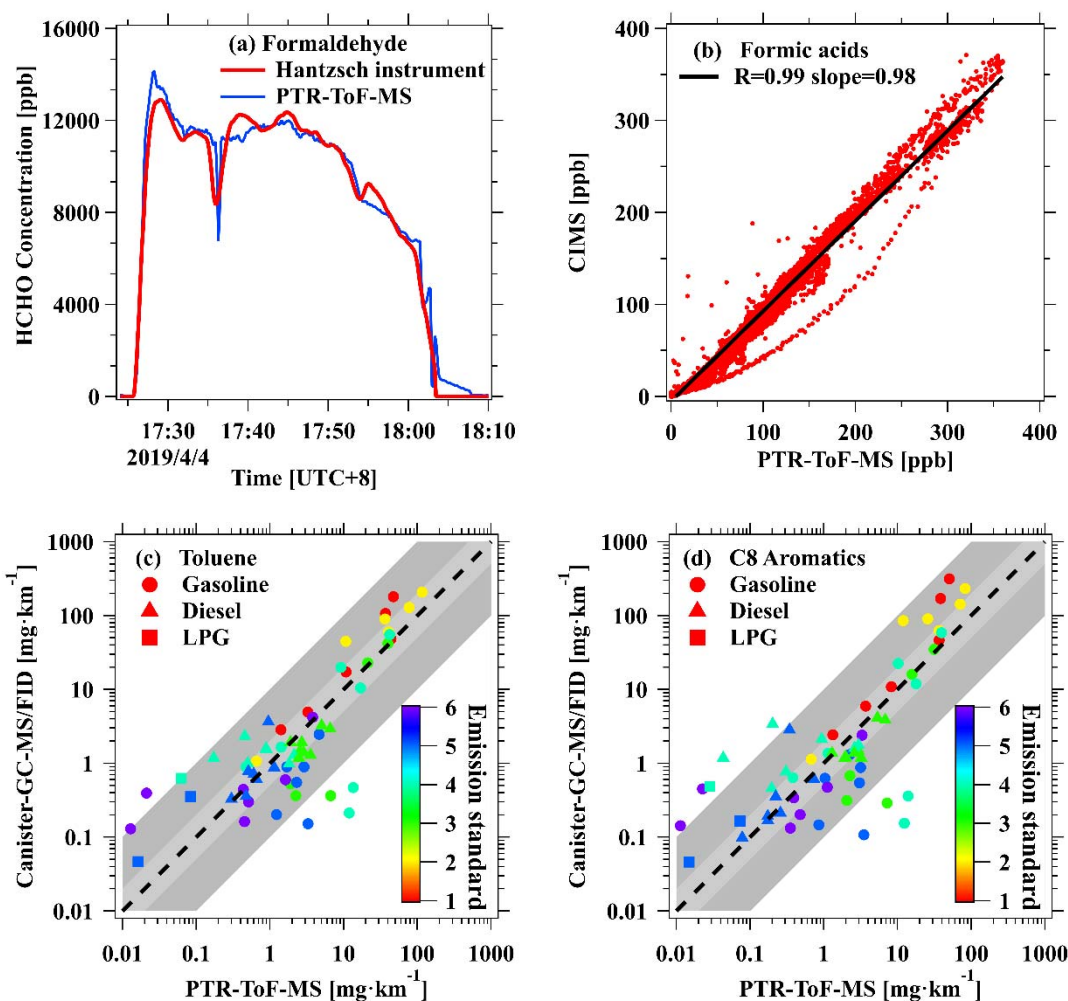

**Figure S6.** (a) Time series of formaldehyde measured by PTR-ToF-MS and the Hantzsch instrument. (b) Scatterplot of the concentration of formic acid between PTR-ToF-MS and the CIMS. Scatterplot of the emission factor of (c) toluene and (d) C<sub>8</sub> aromatics calculated by the data detected by PTR-ToF-MS and Canister-GC-MS/FID. The black dashed lines represent 1:1 ratio, and the shaded areas represent ratios of a factor of 2 and 10 in (c) and (d).

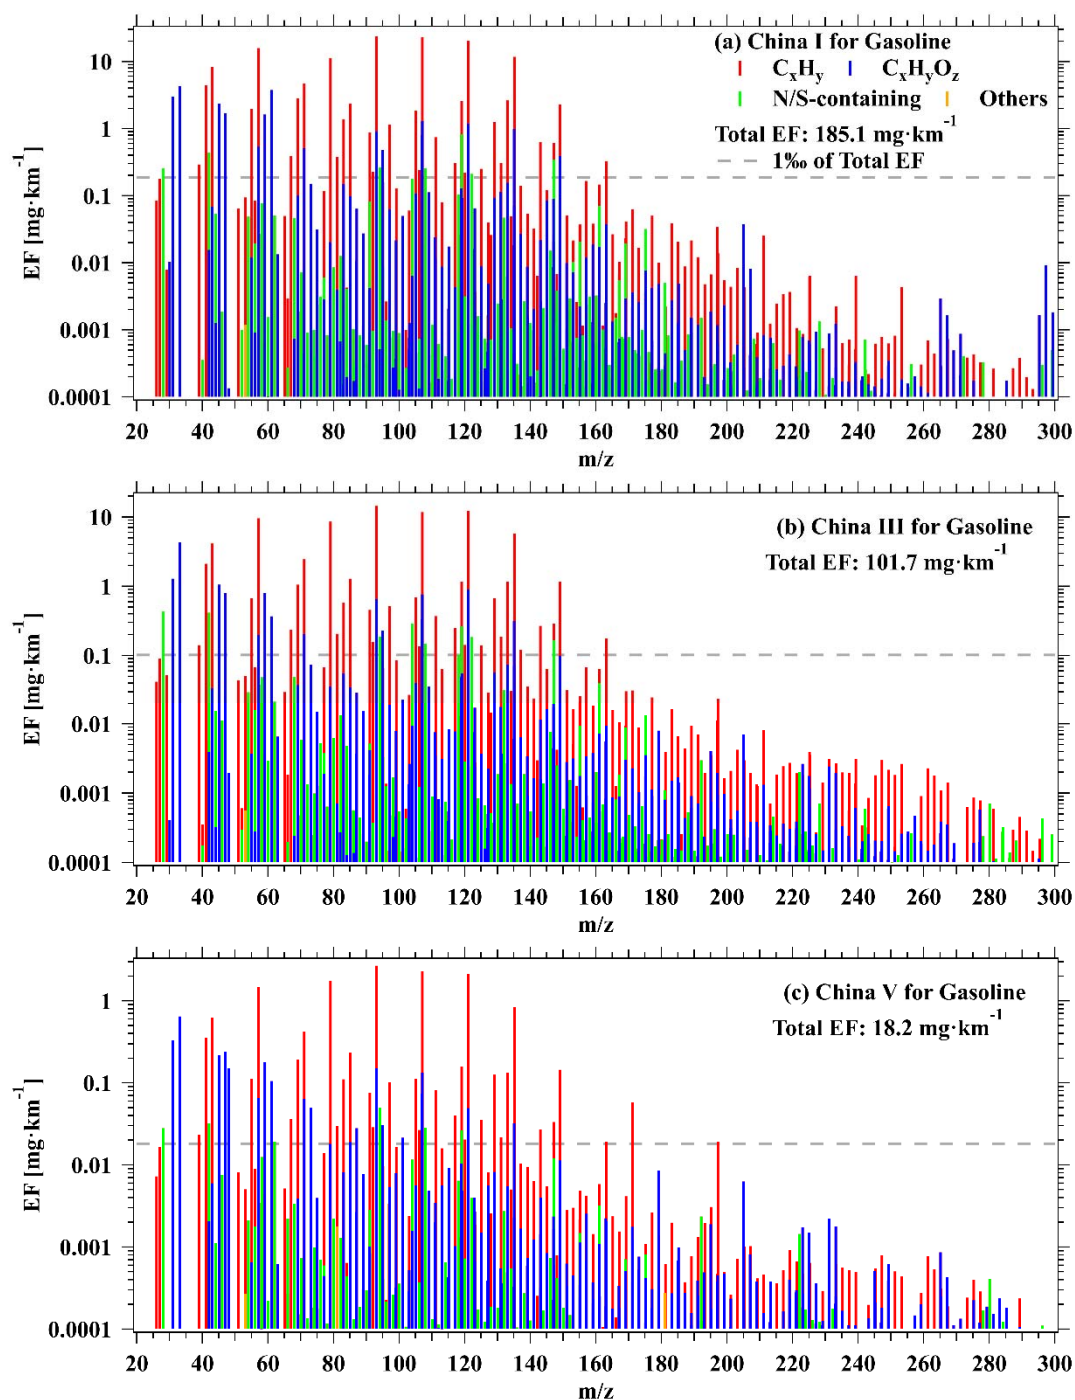

**Figure S7.** The determined average mileage-based emission factors of VOC species measured by PTR-ToF-MS from (a) China I, (b) China III, and (c) China V gasoline vehicles. The gray dashed lines represent 1% of total VOCs emission factors.

231

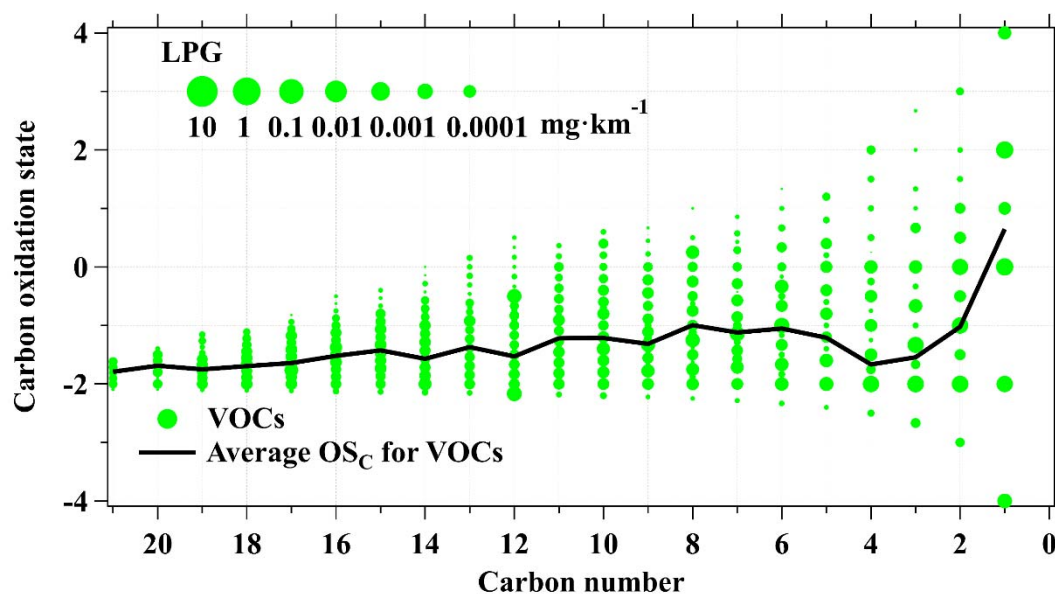

232

233 **Figure S8.** The two-dimensional space of  $\overline{OS}_C - n_C$  with data points sized coded using  
 234 emission factors of VOC species from LPG vehicles. The black line is the average  $\overline{OS}_C$   
 235 of each carbon number for VOC species in LPG vehicles.

236

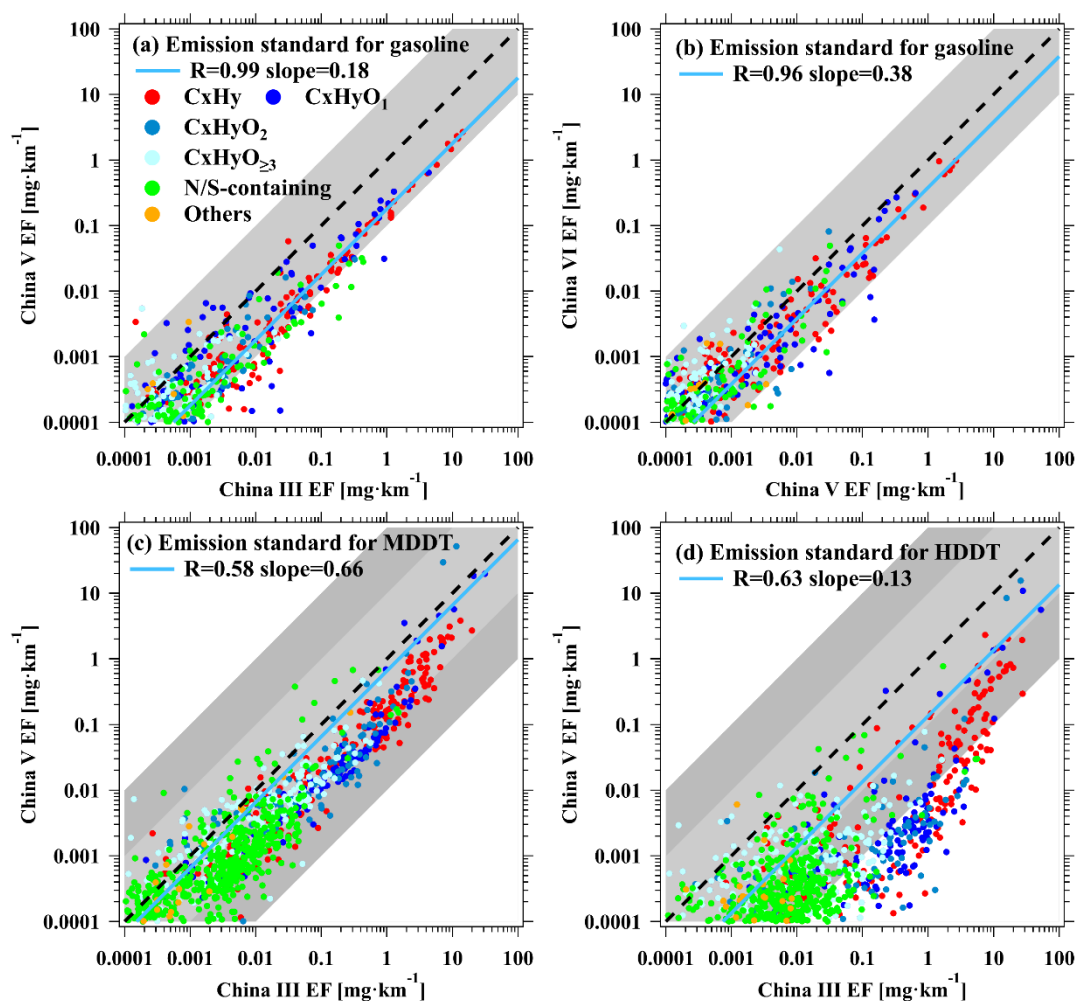

**Figure S9.** Scatterplots of VOCs emission factors between China III and China V emission standard (a) and between China V and China VI emission standard for gasoline vehicles(b). Scatterplots of VOCs emission factors between China III and China V emission standard for LDDT (c) and HDDT(d). Each data point indicates a VOC species measured by PTR-ToF-MS. The blue lines are the fitted results for all data points. The black dashed lines represent 1:1 ratio, and the shaded areas represent ratios of a factor of 10 and 100.

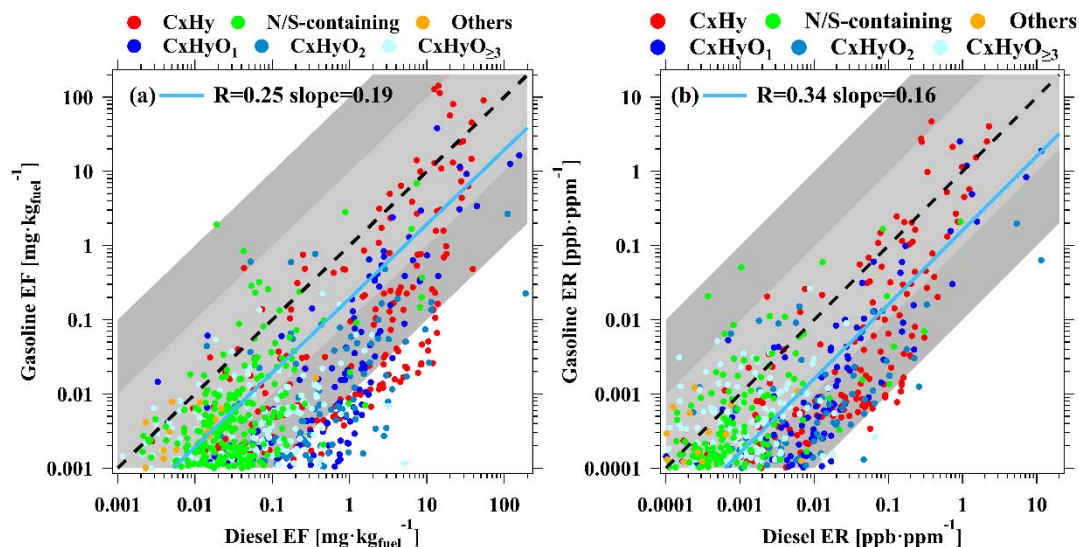

**Figure S10.** Scatterplot of (a) the determined average fuel-based emission factors ( $\text{mg} \cdot \text{kg}_{\text{fuel}}^{-1}$ ) and (b) the emission ratios to CO ( $\text{ppb} \cdot \text{ppm}^{-1}$ ) of VOCs between gasoline and diesel vehicles. Each data point indicates a VOC species measured by PTR-ToF-MS. The blue line is the fitted result for all data points. The black line represents 1:1 ratio, and the shaded areas represent ratios of a factor of 10 and 100.

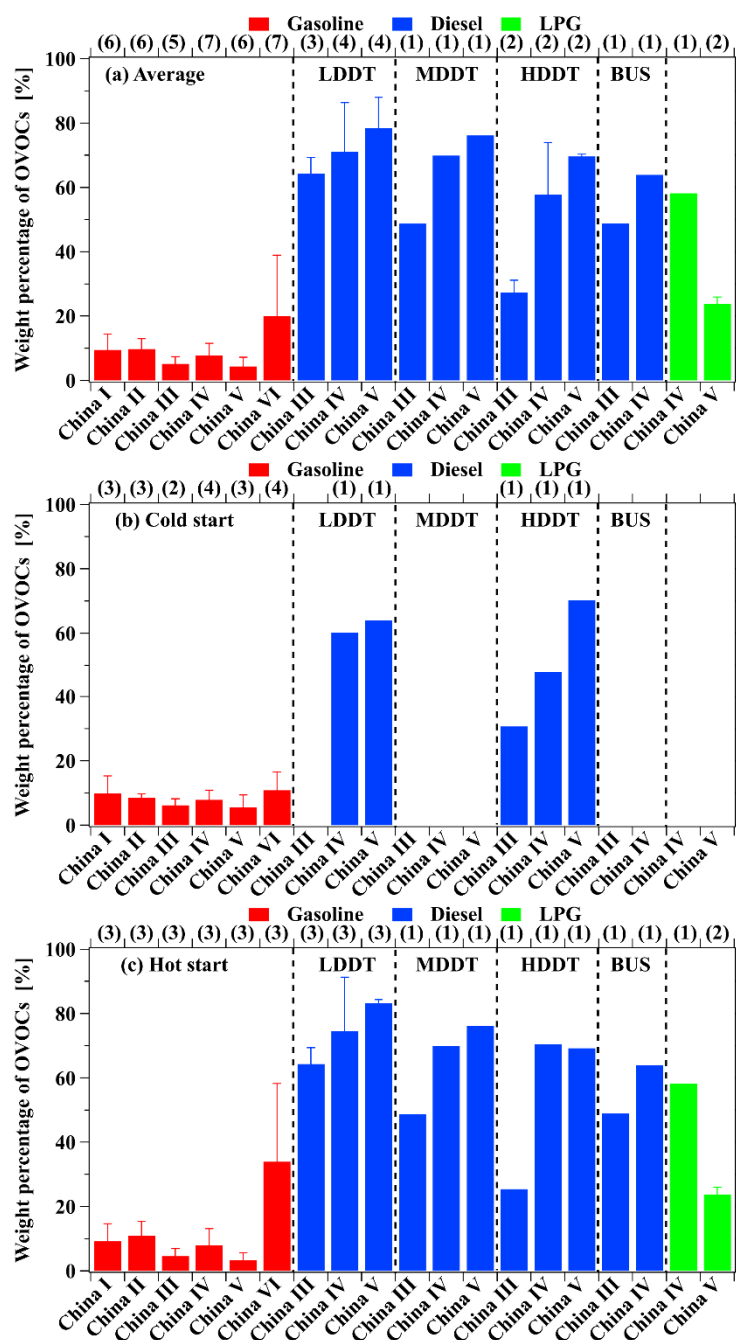

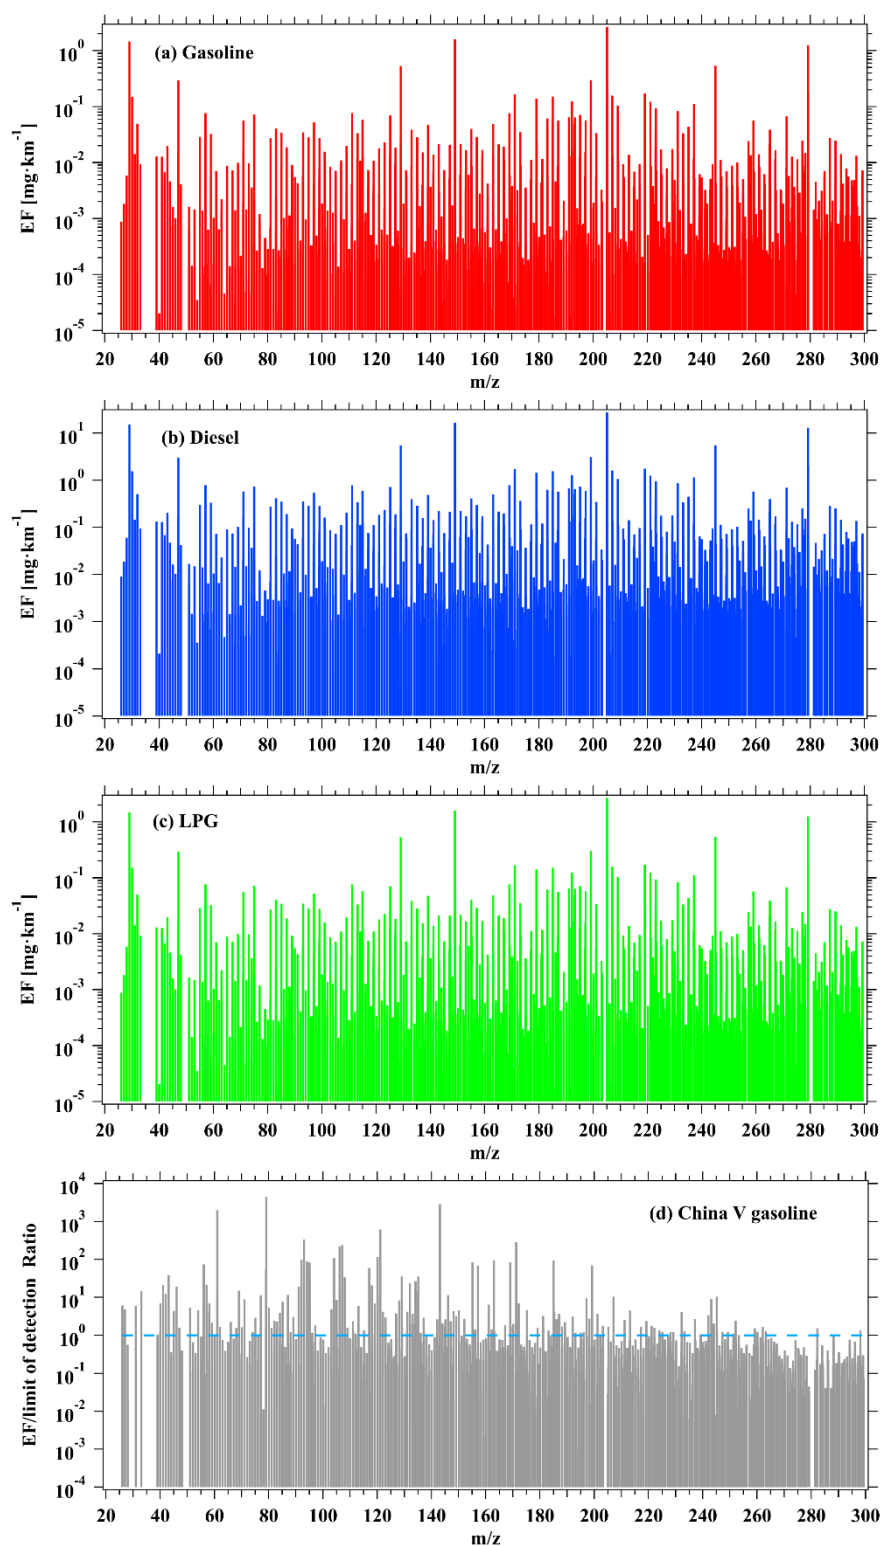

**Figure S12.** The limit of detection for emission factors in (a) gasoline (b) diesel, and (c) LPG vehicles. (d) The ratio of emission factors to the limit of detection in a China V gasoline vehicle, and the blue dashed lines represent a ratio of 1.

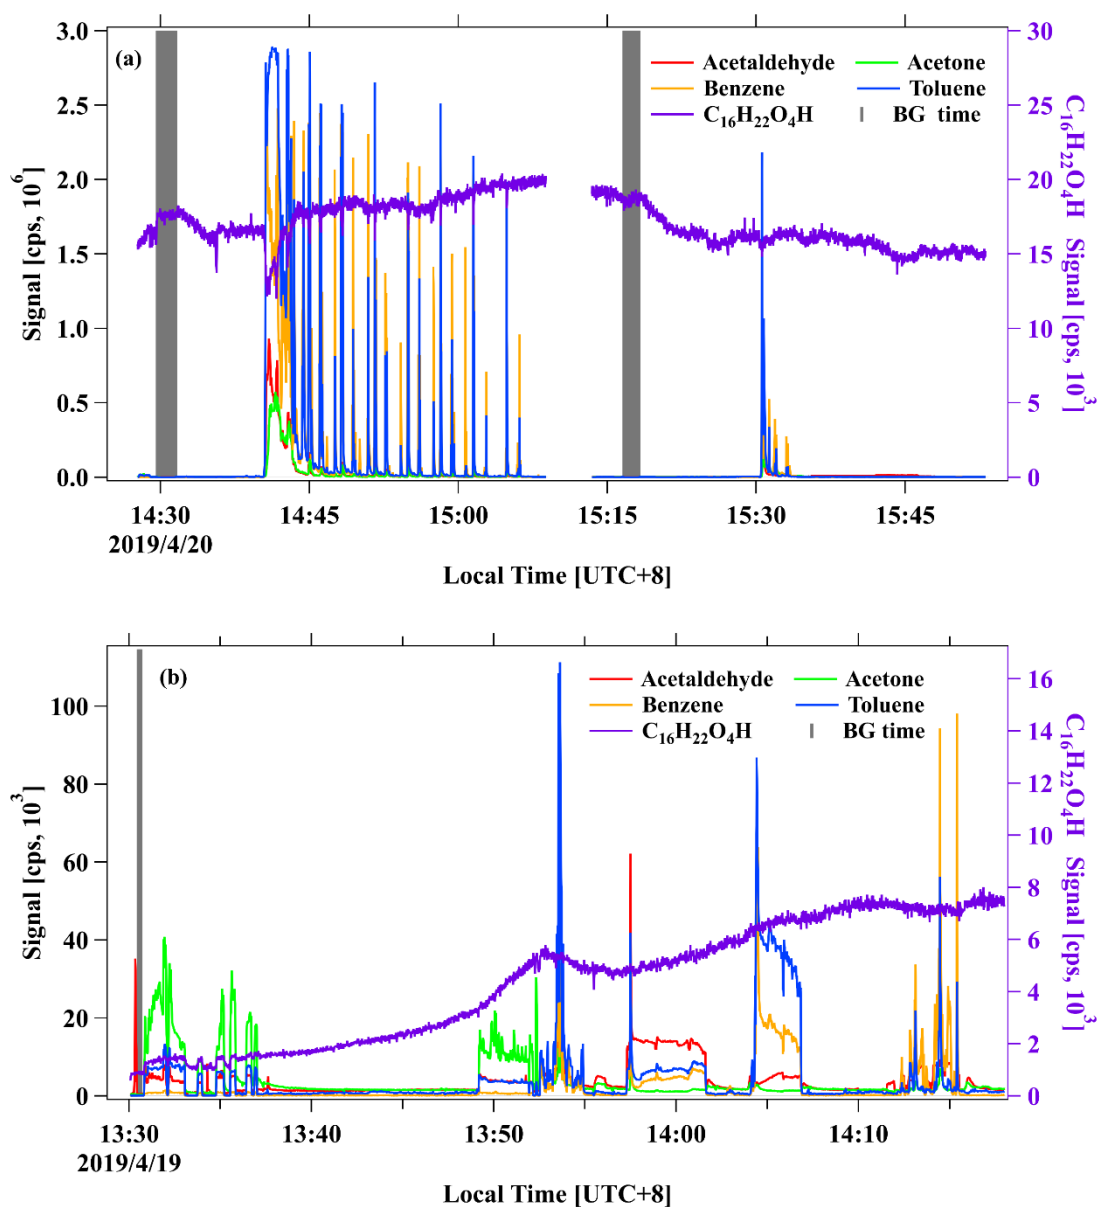

**Figure S13.** Real-time signals of acetaldehyde, acetone, benzene, toluene, and the C<sub>16</sub>H<sub>22</sub>O<sub>4</sub>H (m/z=279) of (a) a gasoline vehicle with China I emission standard from cold start and hot start. (b) Several gasoline vehicles with different emission standard measured by PTR-ToF-MS. The shaded areas represent the period of background.

## 270     **References**

- 271     Limits and measurement methods for emissions from gasoline vehicles under two-  
 272     speed idle conditions and short driving mode conditions, GB 18285-2018.
- 273     Alarcon, P., Bohn, B., and Zetzsch, C.: Kinetic and mechanistic study of the reaction of  
 274     OH radicals with methylated benzenes: 1,4-dimethyl-, 1,3,5-trimethyl-, 1,2,4,5-,  
 275     1,2,3,5- and 1,2,3,4-tetramethyl-, pentamethyl-, and hexamethylbenzene, *Phys Chem*  
 276     *Chem Phys*, 17, 13053-13065, 10.1039/c5cp00253b, 2015.
- 277     Atkinson, R., and Arey, J.: Atmospheric Degradation of Volatile Organic Compounds,  
 278     *Chemical Reviews*, 103, 4605-4638, 10.1021/cr0206420, 2003.
- 279     Berndt, T., and Böge, O.: Rate constants for the gas - phase reaction of  
 280     hexamethylbenzene with OH radicals and H atoms and of 1, 3, 5 - trimethylbenzene  
 281     with H atoms, *International Journal of Chemical Kinetics*, 33, 124-129, 2001.
- 282     de Gouw, J., Middlebrook, A., warneke, C., Goldan, P., Kuster, W., Roberts, J.,  
 283     Fehsenfeld, F., Worsnop, D., Pszenny, A., Keene, W., Marchewka, M., Bertman, S., and  
 284     Bates, T.: Budget of organic carbon in a polluted atmosphere: Results from the New  
 285     England Air Quality Study in 2002, *Journal of Geophysical Research-Atmospheres*, 110,  
 286     D16305, 10.1029/2004JD005623, 2005.
- 287     Drozd, G. T., Zhao, Y., Saliba, G., Frodin, B., Maddox, C., Weber, R. J., Chang, M. O.,  
 288     Maldonado, H., Sardar, S., Robinson, A. L., and Goldstein, A. H.: Time Resolved  
 289     Measurements of Speciated Tailpipe Emissions from Motor Vehicles: Trends with  
 290     Emission Control Technology, Cold Start Effects, and Speciation, *Environ Sci Technol*,  
 291     50, 13592-13599, 10.1021/acs.est.6b04513, 2016.
- 292     Gentner, D. R., Jathar, S. H., Gordon, T. D., Bahreini, R., Day, D. A., El Haddad, I.,  
 293     Hayes, P. L., Pieber, S. M., Platt, S. M., de Gouw, J., Goldstein, A. H., Harley, R. A.,  
 294     Jimenez, J. L., Prevot, A. S., and Robinson, A. L.: Review of Urban Secondary Organic  
 295     Aerosol Formation from Gasoline and Diesel Motor Vehicle Emissions, *Environ Sci*  
 296     *Technol*, 51, 1074-1093, 10.1021/acs.est.6b04509, 2017.
- 297     George, I. J., Hays, M. D., Herrington, J. S., Preston, W., Snow, R., Faircloth, J., George,  
 298     B. J., Long, T., and Baldauf, R. W.: Effects of Cold Temperature and Ethanol Content  
 299     on VOC Emissions from Light-Duty Gasoline Vehicles, *Environ Sci Technol*, 49,  
 300     13067-13074, 10.1021/acs.est.5b04102, 2015.
- 301     Hou, S., and Jiang, X.: Determination of Hydrocarbon Composition in Diesel Oil by  
 302     Gas Chromatography Mass Spectrometry (in Chinese), *Technology & Development of*  
 303     *Chemical Industry*, 47, 57-58+69, 2018.
- 304     Huang, J., Yuan, Z., Duan, Y., Liu, D., Fu, Q., Liang, G., Li, F., and Huang, X.:  
 305     Quantification of temperature dependence of vehicle evaporative volatile organic  
 306     compound emissions from different fuel types in China, *Science of The Total*  
 307     *Environment*, 813, 152661, <https://doi.org/10.1016/j.scitotenv.2021.152661>, 2022.
- 308     Kroll, J. H., Donahue, N. M., Jimenez, J. L., Kessler, S. H., Canagaratna, M. R., Wilson,  
 309     K. R., Altieri, K. E., Mazzoleni, L. R., Wozniak, A. S., Bluhm, H., Mysak, E. R., Smith,  
 310     J. D., Kolb, C. E., and Worsnop, D. R.: Carbon oxidation state as a metric for describing  
 311     the chemistry of atmospheric organic aerosol, *Nat Chem*, 3, 133-139,

10.1038/nchem.948, 2011.

Liu, W., and Zhang, X.: Determination of Polycyclic Aromatic Hydrocarbons in Diesel with Gas Chromatography - Mass Spectrometry (in Chinese), Guangzhou Chemical Industry, 43, 139-141, 2015.

Lyu, M., Bao, X., Zhu, R., and Matthews, R.: State-of-the-art outlook for light-duty vehicle emission control standards and technologies in China, Clean Technologies and Environmental Policy, 22, 757-771, 10.1007/s10098-020-01834-x, 2020.

China Mobile Source Environmental Management Annual Report: <http://www.mee.gov.cn/hjzl/sthjzk/ydyhjgl/201909/P020190905586230826402.pdf>, 2019.

Qi, L., Zhao, J., Li, Q., Su, S., Lai, Y., Deng, F., Man, H., Wang, X., Shen, X. e., Lin, Y., Ding, Y., and Liu, H.: Primary organic gas emissions from gasoline vehicles in China: Factors, composition and trends, Environmental Pollution, 290, 117984, <https://doi.org/10.1016/j.envpol.2021.117984>, 2021.

Sun, L., Zhong, C., Peng, J., Wang, T., Wu, L., Liu, Y., Sun, S., Li, Y., Chen, Q., Song, P., and Mao, H.: Refueling emission of volatile organic compounds from China 6 gasoline vehicles, Science of The Total Environment, 789, 147883, <https://doi.org/10.1016/j.scitotenv.2021.147883>, 2021.

Tan, Z., Lu, K., Hofzumahaus, A., Fuchs, H., Bohn, B., Holland, F., Liu, Y., Rohrer, F., Shao, M., Sun, K., Wu, Y., Zeng, L., Zhang, Y., Zou, Q., Kiendler-Scharr, A., Wahner, A., and Zhang, Y.: Experimental budgets of OH, HO<sub>2</sub>, and RO<sub>2</sub> radicals and implications for ozone formation in the Pearl River Delta in China 2014, Atmospheric Chemistry and Physics, 19, 7129-7150, 10.5194/acp-19-7129-2019, 2019.

Tang, G., Sun, J., Wu, F., Sun, Y., Zhu, X., Geng, Y., and Wang, Y.: Organic composition of gasoline and its potential effects on air pollution in North China, Science China Chemistry, 58, 1416-1425, 10.1007/s11426-015-5464-0, 2015.

Wang, X., Tian, Z., and Zhang, Y.: Influence of Fuel Quality on Vehicle Emission and Economic Analysis of Upgrading Fuel Quality in China (in Chinese), Bulletin of Chinese Academy of Sciences, 30, 535-541, 10.16418/j.issn.1000-3045.2015.04.013, 2015.

Wang, Z., Yuan, B., Ye, C., Roberts, J., Wisthaler, A., Lin, Y., Li, T., Wu, C., Peng, Y., Wang, C., Wang, S., Yang, S., Wang, B., Qi, J., Wang, C., Song, W., Hu, W., Wang, X., Xu, W., Ma, N., Kuang, Y., Tao, J., Zhang, Z., Su, H., Cheng, Y., Wang, X., and Shao, M.: High Concentrations of Atmospheric Isocyanic Acid (HNCO) Produced from Secondary Sources in China, Environ Sci Technol, 54, 11818-11826, 10.1021/acs.est.0c02843, 2020.

Yuan, B., Koss, A. R., Warneke, C., Coggon, M., Sekimoto, K., and de Gouw, J. A.: Proton-Transfer-Reaction Mass Spectrometry: Applications in Atmospheric Sciences, Chemical Reviews, 117, 13187-13229, 10.1021/acs.chemrev.7b00325, 2017.

Yue, X., Wu, Y., Hao, J., Pang, Y., Ma, Y., Li, Y., Li, B., and Bao, X.: Fuel quality management versus vehicle emission control in China, status quo and future perspectives, Energy Policy, 79, 87-98, <https://doi.org/10.1016/j.enpol.2015.01.009>,

354 2015.

355
