# Supplementary material for: Oxygenated volatile organic compounds (VOCs) as significant but varied contributors to VOC emissions from vehicles
Source: Copernicus journal article supplement (doi:10.5194/acp-22-9703-2022), 2022-07-29
Supplement: Supplementary file 1 [file Vehicle_PTR_Table_SI_V31.xlsx]

## Sheet: EF_mg_km
Emission Factor (mg·km-1)
Number	Ion formula (H+)	Fuel type	Gasoline Vehicles										LDDT			MDDT			HDDT			Bus		LDDT	MDDT	HDDT	BUS	Diesel Vehicles				LPG Vehicles
		Emission standard	China I	China II	China III	China IV	China V	China VI	Arithmetic mean		Weighted mean		China III	China IV	China V	China III	China IV	China V	China III	China IV	China V	China IV	China V	Arithmetic mean	Arithmetic mean	Arithmetic mean	Arithmetic mean	Arithmetic mean		Weighted mean		China IV	China V	Arithmetic mean
		Ion mass (H+)							avg	stdev	avg	stdev																avg	stdev	avg	stdev			avg	stdev
1	C2H2	26.0151	0.0834876	0.16569	0.0418888	0.0413414	0.00726083	0.00402909	0.057283	0.0604452	0.0372758	0.0390828	0.181565	0.0622953	0.0488174	0.196028	0.14773	0.0876971	0.353572	0.0366158	0.0523522	0.124271	0.0405872	0.0975592	0.143818	0.147513	0.0824289	0.11783	0.032765	0.139388	0.110337	0.00191321	0.00508626	0.00349974	0.00224369
2	C2H3	27.0229	0.178682	0.380864	0.091233	0.101085	0.0165296	0.00986689	0.12971	0.137803	0.0869644	0.087975	0.46414	0.153739	0.132016	0.499649	0.378868	0.218879	1.04974	0.105161	0.130761	0.352069	0.110646	0.249965	0.365799	0.428553	0.231358	0.318918	0.0942317	0.382676	0.327846	0.00180064	0.0134012	0.00760094	0.00820287
3	HCNH	28.0182	0.258464	1.80593	0.435345	2.01903	0.0280991	0.0202817	0.76119	0.907623	1.03773	0.957724	0.509922	0.537492	1.67135	0.736229	1.08518	0.680485	1.69358	1.096	0.77074	0.483308	1.35943	0.906255	0.833964	1.18677	0.921369	0.96209	0.154569	0.947574	0.482083	0.0705578	0.346481	0.208519	0.195107
4	C2H4	28.0308	0.00214499	0.00315259	0.00046486	0.00514865	0.000330304	0.000195798	0.0019062	0.00198042	0.00256446	0.00240257	0.00756402	0.00172815	0.000711641	0.00375106	0.00376272	0.00103672	0.00516497	0	0.00394573	0.00525945	0.00427859	0.0033346	0.00285017	0.0030369	0.00476902	0.00349767	0.000870725	0.00394907	0.0026733	0.00103024	0.00291643	0.00197333	0.00133374
5	C2H5	29.0386	0.00791289	0.103785	0.0520039	0.130677	0	0.042938	0.0562194	0.0519512	0.0770119	0.055199	0	0	0	0	0	0	1.23804	0	0	0	0	0	0	0.412681	0	0.10317	0.206341	0.194373	0.459542	0	0	0	0
6	CH2O	30.01	0.0103849	0.00796531	0.000404436	0.000330987	0	0.000781245	0.00331114	0.00461287	0.0010086	0.0032476	0.241428	0.101978	0.100207	0.814967	0.203515	0.141889	0.22634	0.399103	0.325595	0.632148	0.223562	0.147871	0.38679	0.317012	0.427855	0.319882	0.123465	0.265652	0.172795	0.0173325	0.0118334	0.0145829	0.00388848
7	CH2OH	31.0178	2.99752	5.41722	1.28219	1.22104	0.330576	0.270443	1.91983	1.97658	1.1904	1.29653	45.6876	14.2771	10.166	31.4755	26.9553	19.8275	52.7873	6.86645	5.58682	13.7993	5.82904	23.3769	26.0861	21.7469	9.81418	20.256	7.1876	26.1464	19.5763	0.290423	0.347569	0.318996	0.0404088
8	C2H6H	31.0542	5.40653e-05	0.00154045	4.32848e-05	7.47158e-05	3.29177e-05	1.05488e-05	0.000292664	0.000611661	0.000117679	0.00035575	0.0697185	0.00166096	0.00165383	0.0159115	0.00257721	0.00120616	0.00536184	0	0	0	0	0.0243444	0.00656496	0.00178728	0	0.00817416	0.0111307	0.0178729	0.0301643	1.11094e-05	4.00781e-05	2.55938e-05	2.0484e-05
9	CH3OH	32.0257	0	0	0	0	0	0	0	0	0	0	0	0	0	0.0104082	0	0.00600584	0	0	0.00349282	0	0	0	0.00547136	0.00116427	0	0.00165891	0.00260022	0.000520124	0.00223477	0	0	0	0
10	CH4OH	33.0335	4.28607	14.4093	4.34865	3.90987	0.644408	0.314155	4.65207	5.11583	3.41739	3.15097	3.6857	1.4726	0.899006	2.93874	2.77885	1.85837	3.74433	0.317282	0.467589	1.70875	0.277361	2.0191	2.52532	1.50973	0.993057	1.7618	0.65921	2.11525	1.44566	0.161441	0.185269	0.173355	0.0168487
11	C3H3	39.0229	0.291799	0.614631	0.14146	0.177629	0.0233634	0.0121054	0.210165	0.223678	0.144404	0.142706	0.614291	0.182772	0.091298	0.641797	0.390358	0.206541	1.10513	0.0686634	0.147923	0.359143	0.11159	0.29612	0.412899	0.440571	0.235366	0.346239	0.0968617	0.429287	0.366287	0.00281317	0.00919758	0.00600537	0.00451446
12	C2HNH	40.0182	0.000355613	0.00086724	0.000175128	0.000240547	3.84443e-05	2.48743e-05	0.000283641	0.000311923	0.000195159	0.000195331	0.000616103	7.1675e-05	0.000177366	0.000903274	0.000691703	0.000350341	0.00203095	0	0.000322658	0.00103088	0.000214452	0.000288381	0.000648439	0.000784536	0.000622667	0.000586006	0.000210742	0.000628661	0.000676076	8.41001e-06	3.45609e-05	2.14855e-05	1.84915e-05
13	C3H4	40.0308	0.00021823	0.000549247	0.000352322	0.000262383	6.93042e-05	4.93256e-05	0.000250135	0.000186602	0.000228397	0.000131898	0.000400033	6.17958e-05	0.000262113	0.000428319	0.000799649	0.000534016	0.000821756	0	0.000388628	0.00039346	0.000229668	0.000241314	0.000587328	0.000403461	0.000311564	0.000385917	0.000149792	0.000347108	0.000269884	4.10658e-05	3.02307e-05	3.56483e-05	7.6616e-06
14	C3H5	41.0386	4.37265	8.62045	2.11305	2.29438	0.352337	0.177212	2.98835	3.15391	1.97962	2.03234	6.2133	2.03797	1.06666	6.5778	3.95397	2.11889	11.3243	0.730811	1.4515	3.75491	1.18535	3.10598	4.21689	4.50222	2.47013	3.5738	0.95087	4.42559	3.71239	0.044183	0.135756	0.0899696	0.064752
15	C2HOH	42.01	0.0155012	0.0168306	0.00393978	0.00384071	0.00205934	0.00131313	0.00724747	0.00699488	0.00412826	0.00477475	0	0	0.0002029	0.00083582	0	0.00184934	0.0182495	0	0	0.000155729	0	6.76335e-05	0.000895054	0.00608318	7.78647e-05	0.00178093	0.00289424	0.00293036	0.00671396	0.00413578	0.00578107	0.00495843	0.00116339
16	C2H3NH	42.0338	0.443932	0.761417	0.415713	0.228175	0.0318901	0.0493613	0.321748	0.277141	0.236511	0.19748	0.0510685	0.216113	0.183219	0.0511618	0.18229	0.118985	0.106781	0.0913027	0.0688931	0.0288375	0.161701	0.150134	0.117479	0.0889922	0.0952693	0.112969	0.0276268	0.113956	0.0641126	0.0132035	0.0218685	0.017536	0.00612703
17	C3H6	42.0464	0.00347325	0.00592129	0.00579923	0.00638075	0.00143152	0.000441637	0.00390795	0.00253307	0.00447953	0.00250478	0.00613083	0.00119978	0.00250306	0.00619372	0.00582455	0.00428974	0.010666	0.00172933	0.00569101	0.00672922	0.00448699	0.00327789	0.00543601	0.00602877	0.0056081	0.00508769	0.00123196	0.00506797	0.00314469	0.00108462	0.000840555	0.000962586	0.000172579
18	C2H2OH	43.0178	0.0681261	0.134724	0.0335133	0.027794	0.00597292	0.00582864	0.0459931	0.0491217	0.0281432	0.0321898	5.01773	1.23194	0.864518	2.85045	1.95297	1.89847	4.08437	0.693934	0.478473	1.32356	0.279456	2.3714	2.23396	1.75226	0.801507	1.78978	0.710321	2.43187	1.94583	0.0177772	0.0137036	0.0157404	0.00288049
19	C3H6H	43.0542	8.2689	15.5753	4.13655	3.7974	0.629173	0.299832	5.45119	5.73915	3.49646	3.74638	7.99916	3.12875	1.66919	9.04028	5.46893	3.11033	16.4927	1.10709	2.02585	5.47947	1.80531	4.2657	5.87318	6.54188	3.64239	5.08079	1.35352	6.22522	5.24654	0.0992963	0.216578	0.157937	0.0829308
20	HNCOH	44.0131	0.0534099	0.0454309	0.0154018	0.00617425	0.00111368	0.000288449	0.0203032	0.0233235	0.00942913	0.0164167	0.231799	0.179513	0.0380085	0.303391	13.0601	0.67719	0.38072	0.0179571	0.033127	0.184054	0.0586213	0.149774	4.68022	0.143935	0.121338	1.27382	2.27097	0.469318	2.05659	0.0165934	0.017976	0.0172847	0.000977638
21	C2H4O	44.0257	0.00125926	0.00176694	0.000326824	0.000847567	7.83083e-05	0.000208215	0.000747851	0.000667348	0.000584197	0.000454879	0	0	0.00102515	0	0.178063	0	0	0	0	0.00713448	0.000814582	0.000341717	0.0593544	0	0.00397453	0.0159177	0.0290136	0.00451401	0.0284718	0	0.000228614	0.000114307	0.000161654
22	C2H5NH	44.0495	0.00703241	0.00579614	0.00340016	0.00314651	0.00104256	0.00031672	0.00345575	0.00260943	0.0026685	0.00175886	0.00719643	0.0030454	0.00378071	0.0131063	0.137217	0.00716388	0.024941	0.00232082	0.00621933	0.0158195	0.00544884	0.00467418	0.0524959	0.0111604	0.0106342	0.0197411	0.0220337	0.0118379	0.0217957	0.000483068	0.000615355	0.000549212	9.35407e-05
23	C2H4OH	45.0335	2.36131	3.92135	1.05079	1.19507	0.21819	0.16859	1.48588	1.43625	1.01566	0.937227	23.8242	11.5918	12.6707	21.039	24.7736	18.3281	27.9061	8.01849	10.8621	11.0686	9.60879	16.0289	21.3803	15.5956	10.3387	15.8359	4.51125	17.0393	7.53525	0.057648	0.163572	0.11061	0.0748994
24	C3H8H	45.0699	0.0451591	0.0581127	0.0159534	0.018794	0.00371312	0.00229489	0.0240045	0.0227416	0.0159327	0.0150375	0.543337	0.131933	0.238368	0.434794	0.314164	0.153191	0.16615	0.225976	0.0877656	0.0246317	0.0283305	0.304546	0.300717	0.159964	0.0264811	0.197927	0.132625	0.247652	0.187494	0	0.00126579	0.000632896	0.00089505
25	CH3NOH	46.0287	0.00188004	0.00529499	0.0112251	0.00952764	0.00755831	0.00995996	0.00757434	0.00347722	0.00919449	0.00250061	0.0684653	0.028868	0.00859961	0.0324802	0	0	0.0955146	0.037247	0.0400141	0	0	0.035311	0.0108267	0.0575919	0	0.0259324	0.0257614	0.0438421	0.0366027	0.00843632	0.00421863	0.00632747	0.00298235
26	CH2O2H	47.0128	0.0405867	0.0257647	0.0286369	0.0161597	0.0161939	0.0109664	0.0230514	0.0108316	0.0189108	0.00809504	43.886	17.4405	41.8981	11.4945	31.4759	51.7738	25.9623	18.0591	15.4888	5.75965	5.2349	34.4082	31.5814	19.8368	5.49728	22.8309	13.1659	25.5109	13.9548	0.390286	0.300645	0.345465	0.0633858
27	C2H6OH	47.0491	1.69592	3.72231	0.802775	1.09206	0.239859	0.227122	1.29668	1.3107	0.907985	0.826577	11.5862	1.49671	4.25702	1.84706	2.70862	3.52868	8.06169	0.89002	0.61759	0.982506	0.541477	5.77997	2.69479	3.18977	0.761991	3.10663	2.06725	4.90066	4.76588	0.202224	0.219115	0.21067	0.0119437
28	CH3ClH	50.9996	0	0	8.71682e-06	2.06266e-05	1.85367e-06	1.60837e-05	7.88013e-06	8.84287e-06	1.32025e-05	9.47894e-06	0.000119955	0	0	0	0	0	0.00234042	0	0	0	0	3.99851e-05	0	0.000780141	0	0.000205031	0.000383869	0.000395156	0.00086215	0	0	0	0
29	C4H2H	51.0229	0.0642666	0.15265	0.0443522	0.0728666	0.00816977	0.00285275	0.0575262	0.0546407	0.0499398	0.0371471	0.0583305	0.0171992	0.00973665	0.0592592	0.0523977	0.0305963	0.0908063	0.00652109	0.0224715	0.0374246	0.0204937	0.0284221	0.0474177	0.039933	0.0289591	0.036183	0.00917782	0.0403154	0.0291373	0.00022295	0.000221637	0.000222294	9.28547e-07
30	C3HNH	52.0182	0.000993822	0.00210829	0.000295753	0.00129362	4.28765e-05	1.05187e-05	0.000790813	0.000829835	0.000739213	0.000643505	0.00291363	0.00110478	0.000763385	0.0046433	0.00306372	0.00145536	0.00709627	0.000771331	0.00151232	0.00189392	0.00200891	0.00159393	0.00305413	0.00312664	0.00195142	0.00243153	0.000775217	0.00267864	0.00213068	5.75415e-07	4.3163e-06	2.44586e-06	2.64521e-06
31	C4H4	52.0308	0.000725929	0.00209948	0.000606606	0.000975484	9.95511e-05	1.60808e-05	0.000753855	0.000755606	0.000664562	0.000506716	0.00253515	0.000488586	0.000175424	0.00246273	0.0017451	0.00108085	0.00308521	0.00028344	0.000631668	0.00151681	0.000519563	0.00106639	0.00176289	0.00133344	0.00101819	0.00129523	0.000341219	0.00148583	0.00113886	0	0	0	0
32	CH2F2H	53.0197	0.0011963	0.0024278	0.00056201	0.000880445	0.000268838	4.63251e-05	0.000896952	0.000855996	0.000675366	0.00054994	0.000575167	0.000129195	0.000410291	0.00162488	0.00201925	0.00149665	0.00318003	0.000206658	0.00173322	0.00503716	0.00137487	0.000371551	0.0017136	0.00170664	0.00320602	0.00174945	0.00115806	0.0013234	0.0014934	2.24054e-05	3.53155e-05	2.88605e-05	9.12879e-06
33	C4H4H	53.0386	0.0938094	0.31862	0.0504443	0.160072	0.0050427	0.000855706	0.104807	0.120503	0.0957288	0.0844428	0.441609	0.100614	0.0308534	0.391408	0.270963	0.159082	0.575875	0.026943	0.0898477	0.219292	0.0480601	0.191025	0.273818	0.230889	0.133676	0.207352	0.0596276	0.255984	0.213787	0.000504014	0.000462449	0.000483231	2.93907e-05
34	C3H3NH	54.0338	0.0484512	0.0726705	0.0296252	0.0216944	0.00210766	0.0036448	0.029699	0.0272117	0.020491	0.0185303	0.0127133	0.00924951	0.00530017	0.023813	0.014342	0.00660463	0.0403563	0.0031593	0.00383221	0.0095654	0.00384778	0.00908766	0.0149199	0.0157826	0.00670659	0.0116242	0.00442609	0.013784	0.0124278	0.000421951	0.00109568	0.000758817	0.0004764
35	C3H2OH	55.0178	0.011873	0.0302748	0.00367175	0.0039699	0.000648893	0.00013751	0.0084293	0.0114969	0.00422856	0.00738788	0.819144	0.155897	0.0319578	0.551297	0.444666	0.21185	0.63562	0.029283	0.0535286	0.522387	0.00760033	0.335666	0.402605	0.239477	0.264994	0.310686	0.0735561	0.386436	0.332289	0.00168709	0.00153518	0.00161114	0.000107414
36	C2H2N2H	55.0291	3.5666e-07	4.7685e-06	3.16755e-05	2.64255e-05	0	0.00018837	4.19327e-05	7.30174e-05	4.66093e-05	6.18147e-05	0.00731338	0.00309344	0.000395836	0.00404488	0.000929545	0.000601916	0.00830468	0.000468777	0.000998062	0	0	0.00360089	0.00185878	0.00325717	0	0.00217921	0.00163654	0.00380868	0.0036844	0	0	0	0
37	C4H6H	55.0542	1.9532	4.06423	0.666425	1.16329	0.112794	0.0506071	1.33509	1.51333	0.888416	0.964524	6.91218	2.25803	0.489097	7.06918	4.0857	2.0089	12.2862	0.298377	0.846367	4.09289	0.5353	3.21977	4.38793	4.47697	2.31409	3.59969	1.03086	4.64423	4.25749	0.00549625	0.0104976	0.00799694	0.0035365
38	C2HNOH	56.0131	2.95958e-05	0.000141659	1.26635e-05	0.000265049	0	8.96856e-05	8.97754e-05	0.000101035	0.000136183	0.000125168	0	0	0	0	0	0	0.0208873	0	0	0	0	0	0	0.00696242	0	0.0017406	0.00348121	0.0032793	0.00775302	0	0	0	0
39	C3H4O	56.0257	0.000919003	0.00169654	0.000282734	0.000158803	7.03824e-05	3.63337e-05	0.0005273	0.000658177	0.000241896	0.0004525	0.000878267	0.000149247	0.000157601	0.000992648	0.000837321	0.00053897	0.00189564	0	0.000332957	0.00079976	0.000199036	0.000395038	0.000789647	0.000742865	0.000499398	0.000606737	0.000190022	0.000671906	0.000629602	4.64422e-05	6.109e-05	5.37661e-05	1.03576e-05
40	C3H5NH	56.0495	0.0195117	0.0367945	0.015799	0.0156974	0.00178132	0.00168943	0.0152122	0.0130239	0.0124663	0.00882066	0.00814167	0.0247826	0.0140382	0.0105175	0.0479608	0.029976	0.0173128	0.00892723	0.00778455	0.00662482	0.0136133	0.0156542	0.0294848	0.0113415	0.010119	0.0166499	0.00887986	0.0144292	0.00844363	0.0004868	0.00134497	0.000915887	0.000606821
41	C4H8	56.062	0.0850413	0.150662	0.0671909	0.0380362	0.00901635	0.00425461	0.0590336	0.0549219	0.0403802	0.0380568	0.00194339	0.00166849	0.00344112	0.00833375	0.00263694	0.00385522	0.0206188	0.0017557	0.00496691	0.0107357	0.00501592	0.002351	0.00494197	0.00911379	0.00787582	0.00607065	0.00303475	0.00606496	0.00672924	0.000859865	0.000933672	0.000896769	5.21893e-05
42	C2H2NOH	57.0209	0.00223101	0.0050071	0.000321976	0.00069448	0.000128396	9.56928e-05	0.00141311	0.00193281	0.000683523	0.00125354	0	0	0	0	0	0	0	0	0.0014926	0.0404391	0.00803526	0	0	0.000497534	0.0242372	0.00618368	0.0120379	0.00326564	0.0104296	8.07998e-05	8.21434e-05	8.14716e-05	9.50057e-07
43	C3H4OH	57.0335	0.536092	1.36575	0.19988	0.294333	0.0659777	0.0451997	0.417872	0.497583	0.257987	0.311452	13.806	3.65555	1.30388	10.5533	9.71005	5.70674	13.6397	0.951239	1.47694	5.26026	1.0995	6.25515	8.6567	5.35598	3.17988	5.86193	2.26677	7.23324	5.73145	0.00915352	0.0141609	0.0116572	0.00354072
44	C4H9	57.0699	15.7954	31.4207	9.54566	6.99025	1.46801	0.960818	11.0301	11.4003	7.05712	7.51929	10.318	4.47131	1.39796	13.2874	7.16755	3.8113	27.192	1.13715	1.93183	9.10564	2.07861	5.39576	8.08876	10.087	5.59212	7.29091	2.23101	9.07185	8.79958	0.154485	0.195992	0.175238	0.0293499
45	C2H3NOH	58.0287	0.0270715	0.0251727	0.0383007	0.033704	0.00342783	0.0106502	0.0230545	0.0134577	0.0257596	0.013288	0.0108682	0.00648815	0.00152208	0.0132648	0.00906389	0.00614998	0.0281198	0.00193489	0.00219062	0.00989647	0.00192711	0.00629281	0.00949288	0.0107484	0.00591179	0.00811148	0.00238103	0.00991754	0.0088463	0.00357194	0.00145203	0.00251198	0.00149901
46	C3H6O	58.0413	5.34627e-05	2.58813e-05	2.33691e-05	5.30961e-05	0.000100009	0.000389357	0.000107529	0.000140797	0.000105405	0.000123612	0.000753503	0.000849488	0.000294916	0.000419669	7.24474e-05	0.000243141	0.00817583	7.81928e-05	0.000569414	0.00412328	0.0006763	0.000632636	0.000245086	0.00294115	0.00239979	0.00155466	0.00131678	0.00199681	0.00285066	6.67222e-05	5.81777e-05	6.245e-05	6.04188e-06
47	C2H2O2H	59.0128	0.000619787	0.000517958	1.05923e-05	3.54231e-06	9.7387e-06	4.05854e-06	0.00019428	0.000291954	4.7562e-05	0.000207134	0.0160727	0.000118091	0	0	0	5.76906e-05	0.000861846	0.000284331	0.0033717	0.00972339	0.00381894	0.00539694	1.92302e-05	0.00150596	0.00677117	0.00342332	0.00318158	0.00497106	0.00672475	6.16892e-05	0.000100451	8.10702e-05	2.74089e-05
48	C3H6OH	59.0491	1.61892	3.23856	0.797447	0.786653	0.177799	0.125634	1.12417	1.16865	0.727823	0.754814	7.85578	4.112	2.30677	6.24401	6.65598	4.50625	9.9546	0.838948	1.35607	3.28434	1.39625	4.75819	5.80208	4.04987	2.3403	4.23761	1.45529	5.10854	3.33017	0.0216534	0.045931	0.0337922	0.0171669
49	C4H10H	59.0855	0.0162805	0.0355225	0.00364391	0.0131784	0.00440795	0.000661546	0.0122825	0.0128729	0.00916699	0.00835603	0.0906744	0.0136984	0.00843849	0.0713872	0.0228072	0.00706309	0.0297699	0	0	0	0	0.0376038	0.0337525	0.00992329	0	0.0203199	0.0182588	0.0312055	0.0370917	0	0.000138572	6.92861e-05	9.79853e-05
50	C2H3O2H	60.0206	0.000100489	0.000286592	9.16687e-08	0	0	9.12229e-07	6.46809e-05	0.000115873	1.60698e-05	7.81278e-05	0.00160278	0.0004229	0.000276575	0.000295447	0.00132796	0.000713799	0.00236906	0	0.000467123	0.00060768	0.000279577	0.000767418	0.00077907	0.000945395	0.000443629	0.000733878	0.000209882	0.000962996	0.00085022	2.41751e-05	1.42899e-05	1.92325e-05	6.9899e-06
51	C2H5NOH	60.0444	0.00153946	0.00079782	0.0029462	0.000299175	0.000220198	0.000126118	0.000988161	0.00109377	0.000825464	0.00107271	0.0169818	0.00562317	0.00126956	0	0	0	0.0162484	0.00122885	0.00250418	0.00181084	0	0.00795819	0	0.00666047	0.000905418	0.00388102	0.00401103	0.00794095	0.00823708	0.00188673	0.000699163	0.00129294	0.000839734
52	C2H4O2H	61.0284	0.513653	0.490977	0.323739	0.240599	0.0306313	0.0812762	0.280146	0.202112	0.218882	0.142803	24.5499	15.5762	16.3879	7.22102	22.0516	29.6091	15.7522	14.2142	8.4228	3.28885	5.32901	18.838	19.6273	12.7964	4.30893	13.8926	7.0803	15.7359	6.82791	0.221948	0.151194	0.186571	0.050031
53	CN2H4OH	61.0396	0.00607167	0.00362115	0.000785251	0.000224478	0.000297905	0.000312477	0.00188549	0.00242903	0.000684792	0.00168427	0.273397	0.166567	0.200867	0.0395495	0.220516	0.377587	0.0213523	0.0713497	0.0423367	0	0.0281382	0.21361	0.212551	0.0450129	0.0140691	0.121311	0.106718	0.132454	0.104434	0.000624159	0.000327609	0.000475884	0.000209692
54	C2H6SH	63.0263	0.00129997	0.000476894	0.000604899	0.000347744	0.000141255	0.000643601	0.000585727	0.000394943	0.000445046	0.000266492	0.0309507	0.0127667	0.0024963	0.00402252	0.00759657	0.00942863	0.00341778	0.00323468	0.00418236	0	0	0.0154046	0.00701591	0.00361161	0	0.00650803	0.00658661	0.0110638	0.0124537	0	0.00197537	0.000987686	0.0013968
55	C2H6O2H	63.0441	0.0133215	0.0224335	0.00654107	0.0037485	0.000624869	0.000483343	0.0078588	0.00857463	0.00442283	0.00586987	0.0455662	0.0239942	0.0173715	0.0379875	0.0467525	0.036319	0.018735	0.00417524	0.0185102	0.00682444	0.00865701	0.0289773	0.040353	0.0138068	0.00774073	0.0227195	0.0147637	0.0238427	0.0147798	0	6.72322e-05	3.36161e-05	4.75404e-05
56	C5H3H	64.0308	3.50586e-05	0.000149021	5.7802e-05	8.52441e-05	1.5165e-05	9.98308e-06	5.87123e-05	5.23276e-05	5.8912e-05	3.66467e-05	0.00026902	0.00018885	0.000422683	0.000403697	0.000507785	0.0005381	0.00276513	0.000757858	0.00031513	0.000602961	0.000347588	0.000293518	0.000483194	0.00127937	0.000475275	0.000632839	0.000439835	0.000757379	0.000892592	1.51088e-05	1.40653e-05	1.45871e-05	7.3784e-07
57	C2H5ClH	65.0153	3.6351e-05	1.93109e-05	4.09713e-05	5.34806e-05	4.72023e-06	2.32399e-05	2.9679e-05	1.73807e-05	3.68341e-05	1.93377e-05	6.60084e-05	0.000537313	0.00170308	0.000963757	0.00121142	0.0028149	0.001335	0.00059854	0.000343749	0	0	0.000768801	0.00166336	0.000759096	0	0.000797814	0.000680199	0.000612285	0.000619394	0.000288132	0.000123403	0.000205767	0.000116481
58	C5H4H	65.0386	0.0499565	0.0984619	0.0297111	0.035167	0.00517732	0.00175092	0.0367041	0.035374	0.0276207	0.0230123	0.0689623	0.0175216	0.00170723	0.0568012	0.0401399	0.0124364	0.084668	0.00151952	0.00271775	0.0310264	0.00229237	0.0293971	0.0364591	0.0296351	0.0166594	0.0280377	0.00826208	0.0374951	0.033946	0.000181121	0.000203014	0.000192067	1.54812e-05
59	C4H3NH	66.0338	0.000274722	0.000657775	0.000197965	0.000260392	0.00219469	0.000172466	0.000626334	0.000788385	0.000552044	0.000712439	0.00141647	0.000131198	0.000326117	0.00160711	0.00243054	0.00111405	0.00269625	0	0.000289073	0.000897715	0.000250055	0.000624595	0.00171724	0.000995107	0.000573885	0.000977706	0.000527562	0.000996415	0.000947423	1.67237e-05	1.38276e-05	1.52757e-05	2.04785e-06
60	C5H5H	66.0464	0.00296292	0.0126066	0.00186286	0.0044671	0.000269219	5.65566e-05	0.00370422	0.00466648	0.00296084	0.00289076	0.0175094	0.000727708	0.000275787	0.021335	0.00820093	0.00215475	0.0291075	0	0.000404355	0.0100822	0.000463931	0.00617095	0.0105636	0.00983729	0.00527308	0.00796122	0.00262824	0.0102675	0.0111682	0	1.26987e-05	6.34936e-06	8.97935e-06
61	C5H6H	67.0542	0.39031	1.63516	0.235697	0.550874	0.0365805	0.00562022	0.475708	0.604765	0.370951	0.371554	2.04269	0.461548	0.0312834	1.84989	0.82233	0.225505	3.06308	0.0280519	0.0499632	1.06615	0.0514559	0.845173	0.965908	1.04703	0.558801	0.854229	0.213701	1.18651	1.16718	0.00292057	0.00335227	0.00313642	0.000305258
62	C3HNOH	68.0131	1.82929e-05	3.15054e-05	1.75219e-06	2.28352e-06	4.19676e-07	1.21558e-06	9.24487e-06	1.28402e-05	3.52434e-06	8.83555e-06	0.000344248	8.86328e-05	8.46358e-05	0.00033442	0.000293401	0.000218516	0.000457549	2.72265e-06	0.000103449	0.000218272	0.00011103	0.000172505	0.000282112	0.000187907	0.000164651	0.000201794	5.441e-05	0.000218372	0.000157122	3.43472e-06	3.18969e-06	3.3122e-06	1.73261e-07
63	C4H3OH	68.0257	0.000736544	0.000842463	0.000241307	0.000193445	5.87688e-05	2.25903e-05	0.000349186	0.000352212	0.000200881	0.000239777	0.020423	0.00484828	0.00273006	0.0138924	0.0120964	0.00723257	0.0145225	0.00133776	0.00296464	0.00668998	0.00166379	0.00933376	0.0110738	0.00627497	0.00417689	0.00771486	0.00308188	0.00962715	0.00761251	3.94197e-05	5.35283e-05	4.6474e-05	9.97632e-06
64	C4H5NH	68.0495	0.046303	0.088681	0.0492186	0.0298243	0.00335589	0.00434867	0.0369553	0.0321132	0.0286462	0.0226282	0.0123682	0.0100273	0.00293992	0.0153718	0.0173282	0.00432675	0.0254264	0.00249379	0.00165403	0.00738307	0.0028451	0.00844515	0.0123423	0.00985806	0.00511409	0.00893989	0.00301666	0.0107304	0.00784307	0.000512229	0.0014332	0.000972716	0.000651228
65	C5H8	68.062	0.0052243	0.00447054	0.0010619	0.00126648	0.000181329	0.000129439	0.00205566	0.00222287	0.00114699	0.00146047	0.0134854	0.00394512	0.000671543	0.0160659	0.00643754	0.00329297	0.0242578	0.000350277	0.00157827	0.00849576	0.000893162	0.00603401	0.0085988	0.00872879	0.00469446	0.00701401	0.00198265	0.00902014	0.00854023	5.10744e-05	5.2229e-05	5.16517e-05	8.16409e-07
66	C4H4OH	69.0335	0.0999008	0.100672	0.0375245	0.02944	0.00385769	0.00289954	0.0457158	0.0444377	0.0282505	0.0300553	1.76526	0.438974	0.280562	0.967126	0.967274	0.691863	1.50703	0.136111	0.292198	0.526752	0.186403	0.828266	0.875421	0.645114	0.356577	0.676345	0.235186	0.874643	0.68432	0.00460896	0.00410474	0.00435685	0.000356543
67	C5H8H	69.0699	2.80784	5.13659	1.05257	1.38101	0.192084	0.0591357	1.77154	1.92322	1.14217	1.2425	8.34292	3.19652	0.532411	9.74044	4.5776	2.09833	19.8475	0.474276	0.733158	6.26787	0.998156	4.02395	5.47212	7.0183	3.63301	5.03685	1.53973	6.60476	6.66356	0.0188793	0.0216867	0.020283	0.0019851
68	C3H3NOH	70.0287	0.00185315	0.00376405	0.000478081	0.00101421	0.000151554	0.000155879	0.00123615	0.00139558	0.000794828	0.000889792	0.0166745	0.0238096	0.035135	0.0177272	0.0219715	0.0143096	0.0305822	0.019881	0.0150782	0.00663788	0.0104805	0.0252064	0.0180027	0.0218472	0.00855918	0.0184039	0.00719279	0.0208133	0.00802833	8.52329e-05	9.19986e-05	8.86158e-05	4.7841e-06
69	C2H3N3H	70.04	9.19064e-05	0.000358058	2.01172e-05	5.44512e-05	2.14917e-05	1.57964e-05	9.36369e-05	0.00013276	5.1615e-05	8.10661e-05	0.0105104	0.00250076	0.000765341	0.00763355	0.00374687	0.00101369	0.0132787	0.00105912	0.000925449	0.00354565	0.000870738	0.00459217	0.00413137	0.00508777	0.0022082	0.00400487	0.00125984	0.00577595	0.00520676	3.96561e-05	3.04978e-05	3.5077e-05	6.4759e-06
70	C4H6O	70.0413	4.30767e-05	5.17438e-05	1.64939e-05	3.87882e-05	1.88281e-05	1.38812e-05	3.04686e-05	1.60421e-05	2.83097e-05	1.24619e-05	0.00236104	0.000577792	0.000232057	0.00220531	0.00137141	0.000340868	0.0046808	0.00023904	0.000144914	0.00291032	0.000401945	0.00105696	0.00130586	0.00168825	0.00165613	0.0014268	0.000301307	0.00174656	0.00160937	2.40979e-05	2.24836e-05	2.32907e-05	1.14148e-06
71	C4H7NH	70.0651	0.00716843	0.0120504	0.0058629	0.00695596	0.000730474	0.000500753	0.00554483	0.00437429	0.00502365	0.00321887	0.0072012	0.0198272	0.00768666	0.0115061	0.052184	0.0252188	0.0189742	0.00513628	0.00503444	0.00814224	0.00864486	0.0115717	0.0296363	0.00971498	0.00839355	0.0148291	0.00995715	0.0123755	0.00882184	0.000201761	0.00036371	0.000282735	0.000114515
72	C3H2O2H	71.0128	0.000437676	0	9.08302e-06	0	3.09355e-05	5.43764e-06	8.05221e-05	0.000175343	2.04848e-05	9.53931e-05	0.138339	0.00741258	0.000191584	0.000817266	0.00300256	0.0103968	0.0527186	0.00190217	0.00195766	0.0762755	0.00401577	0.0486476	0.00473887	0.0188595	0.0401457	0.0280979	0.0199869	0.0472902	0.0581364	0.000298609	0.000517859	0.000408234	0.000155033
73	C4H6OH	71.0491	0.506858	1.22501	0.203936	0.245621	0.0641758	0.0424355	0.38134	0.445618	0.230143	0.282186	9.50338	2.39383	0.12774	6.88952	5.22766	1.5569	10.2075	0.0855278	0.12283	3.55581	0.0529173	4.00832	4.55803	3.47195	1.80436	3.46066	1.1899	4.79931	4.44514	0.00820329	0.010059	0.00913115	0.00131219
74	C5H10H	71.0855	4.66793	8.71385	2.45187	1.85405	0.420413	0.137507	3.04094	3.22124	1.87464	2.13447	5.53978	2.49403	0.510324	7.27206	3.71085	1.75283	15.8161	0.600663	0.772246	5.0985	0.973855	2.84805	4.24524	5.72967	3.03618	3.96478	1.32952	5.04773	5.17723	0.0336382	0.0291858	0.031412	0.00314834
75	C2HNO2H	72.008	1.70227e-05	2.76291e-05	3.72413e-07	0	1.19062e-06	8.76369e-08	7.71708e-06	1.181e-05	2.02261e-06	8.46329e-06	0.0012501	6.47991e-05	2.31578e-05	0.000302436	0.000241971	0.000143173	0.00132884	0	9.53077e-06	0.000316273	0	0.00044602	0.000229194	0.000446124	0.000158137	0.000319869	0.000148586	0.00054657	0.000634192	6.45438e-06	3.65498e-06	5.05468e-06	1.97947e-06
76	C3H5NOH	72.0444	6.42625e-05	0.000123218	0.000174434	9.23894e-05	7.89701e-05	6.16306e-05	9.91508e-05	4.31849e-05	0.000101778	3.80122e-05	0.00500409	0.0028719	0.000104203	0.00760027	0.00191632	0.000560555	0.0163356	0.00012978	0.000431244	0.00516672	0.000108745	0.00266006	0.00335905	0.0056322	0.00263773	0.00357226	0.00141353	0.00487139	0.00552538	0.00034265	0.000124247	0.000233449	0.000154434
77	C4H8O	72.057	7.46042e-05	3.11206e-05	6.05898e-05	3.98942e-05	2.8928e-05	1.88725e-05	4.23349e-05	2.11495e-05	3.95514e-05	1.46935e-05	0.000692773	0.000559819	6.02572e-05	0.000212446	2.93537e-05	0.000863695	0.0072863	0	0.000292183	0.00261249	7.84473e-05	0.000437617	0.000368498	0.00252616	0.00134547	0.00116944	0.00100809	0.00161069	0.00256083	2.02228e-05	2.19442e-05	2.10835e-05	1.21722e-06
78	C4H9NH	72.0808	0.000914444	0.00147827	0.0013433	0.000527789	0.000134683	0.000189848	0.000764722	0.000574436	0.000624976	0.000473041	0	0.000632844	0.000956813	0	0	0.00172663	0.00247771	0.000831745	0.00178864	0.00522763	0.00268543	0.000529886	0.000575543	0.00169936	0.00395653	0.00169033	0.00160469	0.00130228	0.0014514	0.000534588	0.000273693	0.000404141	0.000184481
79	C3HClH	72.984	7.69834e-05	0.000135495	9.70586e-05	4.07188e-05	0.000119842	6.34133e-05	8.89185e-05	3.55192e-05	7.25634e-05	3.67446e-05	0	0	9.51561e-05	0	0	0	0.000202126	2.41302e-05	0.00030705	0.00137915	0.000463067	3.17187e-05	0	0.000177769	0.000921109	0.000282649	0.000432623	0.000179059	0.000359417	3.19701e-05	4.09714e-05	3.64708e-05	6.36484e-06
80	C3H4O2H	73.0284	0.00599323	0.00681703	0.00277339	0.00103578	0.000274712	0.000123411	0.00283626	0.00293188	0.001518	0.00213105	5.50937	0.934195	0.0493963	2.1103	1.6843	0.611626	3.82578	0.0514879	0.0143002	0.990022	0.00562071	2.16432	1.46874	1.29719	0.497821	1.35702	0.684597	2.21369	2.35593	0.0168344	0.0151756	0.016005	0.00117294
81	C4H8OH	73.0648	0.15047	0.576376	0.074106	0.108004	0.0494035	0.022598	0.163493	0.207161	0.101631	0.124856	1.77558	0.754507	0.0473798	1.41977	1.05228	0.376011	2.53343	0.0412676	0.0426238	0.767268	0.0281236	0.859154	0.949353	0.87244	0.397696	0.769661	0.251144	1.06862	0.950704	0.00388125	0.0087678	0.00632453	0.00345531
82	C5H12H	73.1012	0	0	1.3399e-05	0.000244399	0.000181707	1.15334e-05	7.5173e-05	0.00010877	0.000136284	0.000125311	0.00025112	9.04535e-06	7.86721e-06	0.00254234	0	4.54379e-05	0.000486371	0	0	0	0	8.93442e-05	0.000862592	0.000162124	0	0.000278515	0.000394989	0.000208128	0.000440861	7.71821e-07	2.57274e-07	5.14547e-07	3.6384e-07
83	C2H3NO2H	74.0237	0.000993311	0.00359332	0.000247473	0.000421736	0.000181101	1.5561e-05	0.00090875	0.00135763	0.000448388	0.000844932	0.0702696	0.0318059	0.018802	0.0586287	0.0363268	0.0234739	0.115115	0.00806432	0.00721964	0.0158783	0.00378523	0.0402925	0.0394764	0.0434663	0.00983179	0.0332667	0.0157178	0.0465324	0.0399122	0.000754574	0.000717597	0.000736086	2.61467e-05
84	C3H7NOH	74.06	0.000413609	0.000373376	0.000991963	0.00118557	0.000984562	0.000618066	0.000761191	0.000339101	0.000970149	0.000328603	0.0405581	0.00534818	0.000609759	0.00784142	0	0.00812588	0.0087973	0.0113503	0.00741629	0	0.00203707	0.0155053	0.00532243	0.00918797	0.00101853	0.00775857	0.00614867	0.0138879	0.0162034	0.00147083	0.000686806	0.00107882	0.000554386
85	C2H2O3H	75.0077	0.000149323	0.000143299	1.27454e-05	1.07867e-05	1.4258e-05	1.25466e-05	5.71598e-05	6.90913e-05	2.20882e-05	4.97123e-05	0.000168376	4.2558e-05	5.86714e-06	0	0	0	0.000281559	6.06609e-06	0.000308172	0.00134352	0.000376586	7.2267e-05	0	0.000198599	0.000860051	0.000282729	0.000393535	0.000220801	0.000326196	8.16831e-05	5.20596e-05	6.68714e-05	2.0947e-05
86	C3H6SH	75.0263	0.00386073	0.00356288	0.000991484	0.00280695	0.00123803	0.000703984	0.00219401	0.00138619	0.00195852	0.00104295	0.00578789	0.00348366	0.00270357	0.0020312	0	0.00188222	0	0.00563989	0.00548646	0.00680653	0.00620542	0.00399171	0.00130447	0.00370879	0.00650597	0.00387774	0.00212688	0.0040428	0.00228707	0.00468633	0.00236556	0.00352594	0.00164103
87	C3H6O2H	75.0441	0.0312819	0.047529	0.0150782	0.0106168	0.00396089	0.00636226	0.0191382	0.016948	0.0120643	0.011641	4.6933	1.54722	0.373502	1.9617	2.08268	1.20879	3.60319	0.3011	0.121667	0.986012	0.0437854	2.20467	1.75105	1.34199	0.514899	1.45315	0.717915	2.16895	1.91181	0.0288079	0.0214638	0.0251359	0.00519304
88	C4H10OH	75.0804	0.00234883	0.00436044	0.00128239	0.000786367	0.000176292	7.47232e-05	0.00150484	0.00162744	0.000884608	0.00109811	2.69423e-05	2.78294e-05	0.000127227	0.000440966	0	0	0	5.54405e-06	0	0	0	6.06662e-05	0.000146989	1.84802e-06	0	5.23757e-05	6.90812e-05	3.35154e-05	7.86241e-05	1.7265e-05	9.99534e-06	1.36302e-05	5.14045e-06
89	C2H5NSH	76.0215	0.000197102	0.000425866	0.000150107	0.000237858	5.88369e-05	2.62349e-05	0.000182668	0.000143712	0.000167981	0.000101562	0.000880085	0.000404312	0.000136143	0.000114594	0.00042399	0.000143272	1.4717e-05	3.80181e-05	0.000245966	0.000699481	0.000167965	0.000473513	0.000227285	9.95671e-05	0.000433723	0.000308522	0.000176219	0.000374311	0.000338577	0.000166644	8.37129e-05	0.000125178	5.86408e-05
90	C2H5NO2H	76.0393	0.00309731	0.00867069	0.00530536	0.00172706	0.000697574	0.000620515	0.00335309	0.00314059	0.00243407	0.00231716	0.0289962	0.0189881	0.00707709	0.0480452	0.0143228	0.00816142	0.111946	0.00581852	0.00396887	0.0135048	0.00438949	0.0183538	0.0235098	0.040578	0.00894716	0.0228472	0.0132693	0.0319301	0.0371387	0.000659954	0.000884111	0.000772032	0.000158503
91	C2H4O3H	77.0233	0.000847372	0.00137871	0.000465326	0.000411233	0.00014326	9.01028e-05	0.000556	0.000485455	0.000387169	0.000321462	0.00787702	0.000810113	0.00059925	0.00235278	0.00139097	0.00148926	0.0031863	0.000864261	0.00163026	0.00228273	0.00199873	0.00309546	0.00174433	0.00189361	0.00214073	0.00221853	0.00060704	0.00308849	0.00288861	0	0.000112313	5.61563e-05	7.94171e-05
92	C6H5	77.0386	0.116581	0.255436	0.0677127	0.0789262	0.0140013	0.00523751	0.0896491	0.0912741	0.0644412	0.0581754	0.0546028	0.0125736	0.00718759	0.0533215	0.0302699	0.012335	0.131917	0.00283225	0.0119176	0.0432314	0.0141939	0.024788	0.0319755	0.0488888	0.0287127	0.0335912	0.0106133	0.0430629	0.0439591	0.000332025	0.000520944	0.000426484	0.000133586
93	C3H8SH	77.0419	0.00602418	0.0114048	0.0037754	0.00300231	0.000597066	0.000233462	0.00417288	0.00413672	0.00281934	0.00272802	0.00482263	0.00176607	0.00120953	0.00324253	0.00272997	0.0020697	0.013093	0	0.00163593	0.00380276	0.000463307	0.00259941	0.00268073	0.00490963	0.00213303	0.0030807	0.00124294	0.00409908	0.00433138	5.92179e-05	5.78796e-05	5.85487e-05	9.46343e-07
94	C3H8O2H	77.0597	0.00285551	0.0100517	0.00192322	0.00145924	0.000443586	0.000288564	0.00283698	0.00366085	0.00163862	0.00227969	0.0207676	0.00700503	0.00237691	0.0223882	0.0173779	0.0096148	0.0167457	0	0.00240012	0.00532902	0.000530427	0.0100498	0.0164603	0.00638193	0.00292972	0.00895546	0.00578657	0.0104274	0.00835223	0.000152089	8.50244e-05	0.000118557	4.74218e-05
95	C5H3NH	78.0338	0.000830212	0.0018849	0.000639828	0.000705028	0.00011705	3.58421e-05	0.000702143	0.000664153	0.000555193	0.000430895	0.031845	0.0109667	0.0102762	0.0154504	0.0732949	0.0390374	0.0123425	0.00376239	0.00574103	0.00655112	0.00488802	0.017696	0.0425942	0.00728198	0.00571957	0.0183229	0.0170317	0.0158728	0.0136922	1.70621e-05	1.84956e-05	1.77788e-05	1.01361e-06
96	C4H2N2H	79.0291	0.00176709	0.000418104	1.25837e-05	4.79799e-05	4.2953e-05	6.99833e-05	0.000393115	0.000689836	0.000112071	0.000412335	0.00446446	0.00244181	0.00051386	0.000478644	0.00279869	0.00124201	0.0026481	0.000394183	0.00847212	0.00940992	0.00463491	0.00247338	0.00150645	0.00383813	0.00702242	0.00371009	0.00240648	0.00340514	0.00251502	0.00028238	0.000197054	0.000239717	6.03347e-05
97	C2H6O3H	79.039	0.0202503	0.0495242	0.035544	0.0460622	0.0180546	0.0012962	0.0284552	0.0185325	0.0321911	0.017147	0.00181641	0.0129914	0.0209102	0.0131272	0.0307058	0.0446452	0.000845831	0.0120348	0.00906825	0.0096548	0.0147583	0.011906	0.0294927	0.00731629	0.0122065	0.0152304	0.00976802	0.00936434	0.00977983	0.00116385	0.000764861	0.000964357	0.00028213
98	C6H6H	79.0542	11.2573	24.7843	8.53051	9.21541	1.7644	0.607091	9.35982	8.67782	7.36528	5.63061	4.84596	1.90033	1.3457	4.52268	3.23725	1.97921	7.42033	0.836105	2.31676	2.7245	1.86699	2.69733	3.24638	3.5244	2.29575	2.94096	0.550557	3.45533	2.25324	0.0764271	0.0686996	0.0725634	0.00546416
99	C2H2ClF	79.9824	1.05528e-05	1.3594e-05	0	0	0	0	4.02447e-06	6.30842e-06	9.28316e-07	4.51455e-06	0.00012263	0	1.57539e-06	0.000135929	0.000134514	0	0.00163332	0.000221229	0.000235178	0.00104206	0.000372247	4.14018e-05	9.01476e-05	0.000696577	0.000707155	0.00038382	0.000367811	0.000423518	0.000578192	4.33283e-06	1.09474e-05	7.64014e-06	4.67724e-06
100	C5H5NH	80.0495	0.00852552	0.00642291	0.00626058	0.00869536	0.00222204	0.000348688	0.00541252	0.00340674	0.00583327	0.00325403	0.0127311	0.00572459	0.00274263	0.0133504	0.00905988	0.00485357	0.0223016	0.00293305	0.00393433	0.0080516	0.00382098	0.0070661	0.00908797	0.00972299	0.00593629	0.00795334	0.00175829	0.00960037	0.00681215	0.00037941	0.0004892	0.000434305	7.76328e-05
101	C2H2FClH	80.9902	5.49278e-06	0	7.51518e-05	0.000173824	0.00177834	0.000182204	0.000369168	0.000694819	0.000391298	0.000595844	0	6.42534e-05	0	0	0	0	0	0	0.000243012	0.00211567	0.000856719	2.14178e-05	0	8.10039e-05	0.00148619	0.000397154	0.000726835	0.000220884	0.000572956	0	2.15187e-05	1.07593e-05	1.5216e-05
102	C5H4OH	81.0335	0.00399934	0.00655603	0.000716935	0.000463816	9.18331e-05	0.00018902	0.00200283	0.00267139	0.00079245	0.00185674	0.473441	0.0543203	0.000498249	0.206916	0.129175	0.047578	0.255183	0.000598525	0.00293517	0.120431	0	0.176087	0.12789	0.0862388	0.0602155	0.112608	0.0506734	0.176081	0.195119	0.000575221	0.00113831	0.000856764	0.000398161
103	C6H8H	81.0699	0.379142	1.21745	0.206646	0.314114	0.0300384	0.00703648	0.359071	0.446018	0.244855	0.272651	3.43556	1.01542	0.231587	3.3409	1.34178	0.734956	6.85898	0.207984	0.285168	2.41827	0.552038	1.56085	1.80588	2.45071	1.48515	1.82565	0.438614	2.42983	2.35068	0.00529077	0.00573919	0.00551498	0.000317078
104	C4H3NOH	82.0287	0.000496059	0.000902735	8.70894e-05	2.68071e-05	7.54615e-06	3.36696e-06	0.000253934	0.000369454	8.5218e-05	0.000258885	0.00783557	0.00349307	0.00013241	0.00511314	0.00867292	0.00233179	0.0106015	5.39412e-05	0.000344421	0.00103153	0.000599699	0.00382035	0.00537262	0.00366662	0.000815614	0.0034188	0.00189883	0.00458317	0.00410504	5.77606e-05	4.75039e-05	5.26323e-05	7.25253e-06
105	C5H5OH	82.0413	0.000672351	0.00112207	0.000271938	0.000192529	4.62684e-05	3.0149e-05	0.000389217	0.000428069	0.000216235	0.000289366	0.0289546	0.0026919	0.000178548	0.016945	0.00974607	0.00282563	0.0264407	0	0.000343667	0.0080204	0.000267303	0.0106084	0.00983891	0.00892813	0.00414385	0.00837981	0.00290628	0.0125955	0.0133496	7.66237e-05	6.72501e-05	7.19369e-05	6.62807e-06
106	C5H7NH	82.0651	0.0125689	0.0227871	0.0132922	0.00874869	0.00130116	0.000804595	0.00991711	0.00827887	0.00798483	0.0058923	0.00547318	0.00429649	0.000884524	0.0105127	0.00730856	0.002905	0.0156097	0.000359979	0.00092968	0.00646864	0.00157648	0.0035514	0.00690874	0.0056331	0.00402256	0.00502895	0.00153781	0.00563378	0.00493834	0.000258972	0.000592501	0.000425736	0.000235841
107	C6H9H	82.0777	0.00267513	0.00270301	0.00118639	0.000867011	0.000231126	0.000112469	0.00129586	0.00114999	0.000850055	0.000786216	0.00896237	0.00191158	0.00123781	0.0141139	0.0066159	0.00386067	0.0331323	0	0.00204821	0.0124231	0.00280676	0.00403725	0.00819681	0.0117268	0.00761491	0.00789395	0.00314827	0.00938007	0.0111061	7.85733e-05	7.31508e-05	7.58621e-05	3.83427e-06
108	C4H2O2H	83.0128	0.000153073	8.4392e-05	2.89731e-08	0	1.02119e-05	0	4.12844e-05	6.39239e-05	9.97312e-06	4.38233e-05	0.0875382	0.00204487	0	0	0	0.00770374	0	0.000422323	3.43995e-05	0.0108476	0	0.029861	0.00256791	0.000152241	0.00542378	0.00950124	0.0137431	0.0214056	0.0382438	2.77481e-05	8.40717e-05	5.59099e-05	3.98268e-05
109	C2H2N4H	83.0352	0.000301307	0.000839287	0.000178883	0.000105824	8.30634e-05	1.51062e-05	0.000253912	0.000302882	0.000141116	0.000197998	0	0.000224198	0.000200973	0.00639416	0.00370146	0.00235049	0	0.000240145	0.00048353	0.00333256	0.000598476	0.000141724	0.0041487	0.000241225	0.00196552	0.00162429	0.00187971	0.000646993	0.00167623	0.000141214	9.54915e-05	0.000118353	3.23306e-05
110	C5H6OH	83.0491	0.150267	0.305957	0.0553686	0.0393893	0.0081973	0.00369539	0.0938125	0.116691	0.0474294	0.0777762	4.0346	0.86877	0.0130583	2.70672	1.7382	0.350693	3.73675	0.00568549	0.0204357	1.4814	0	1.63881	1.59854	1.25429	0.740699	1.30808	0.415757	1.88684	1.80962	0.00627737	0.00559376	0.00593557	0.000483385
111	C4H6N2H	83.0604	0.00186514	0.00377789	0.000834941	0.000412723	0.000228041	0.000124721	0.00120724	0.00141008	0.000615342	0.000966597	0.0585434	0.00612817	0.00175124	0.0451192	0.0253279	0.00740192	0.00679375	0.00102064	0.0020662	0.0335175	0.00560802	0.0221409	0.0259497	0.00329353	0.0195628	0.0177367	0.00997981	0.0204753	0.0232635	0.000260151	0.000217961	0.000239056	2.98327e-05
112	C6H10H	83.0855	1.37723	2.46877	0.580553	0.639361	0.110841	0.0262762	0.867171	0.920701	0.55621	0.598839	5.66896	2.42382	0.499726	6.99229	3.0522	1.62252	14.2933	0.481376	0.641982	5.25905	1.08978	2.86417	3.889	5.1389	3.17441	3.76662	1.01049	4.79977	4.70123	0.0163558	0.0200236	0.0181897	0.00259357
113	C3HNO2H	84.008	1.71005e-05	2.34259e-05	1.02371e-06	1.76748e-06	7.02216e-07	1.51828e-06	7.58968e-06	1.00255e-05	2.85696e-06	7.04729e-06	0.000530202	9.45008e-06	3.82915e-06	0.000171649	8.81364e-05	8.22894e-05	0.000620171	0	5.46139e-05	0.000269364	7.02813e-05	0.00018116	0.000114025	0.000224928	0.000169823	0.000172484	4.56443e-05	0.000254425	0.000271271	1.97215e-06	3.29201e-06	2.63208e-06	9.3328e-07
114	C4H3O2H	84.0206	1.30402e-05	1.27533e-05	6.46649e-07	1.55071e-07	3.79989e-07	2.62091e-07	4.53955e-06	6.47616e-06	1.25372e-06	4.66566e-06	0.00249018	0.000114866	8.2734e-06	0.000282571	0.000182624	0.000138511	0.00088706	1.09532e-05	1.42503e-05	0.000374	0	0.000871108	0.000201235	0.000304088	0.000187	0.000390858	0.000324388	0.000774717	0.00105722	2.17191e-06	1.88869e-06	2.0303e-06	2.00267e-07
115	C4H5NOH	84.0444	0.00309544	0.00545622	0.00134218	0.0022588	0.000296908	6.83552e-05	0.00208632	0.00201158	0.00161117	0.00133561	0.0114306	0.0146083	0.00928597	0.0122438	0.012981	0.00610264	0.0179313	0.010493	0.00627822	0.00413645	0.00169295	0.011775	0.0104425	0.0115675	0.0029147	0.00917491	0.00421433	0.0113326	0.00502422	0.000318625	0.000182247	0.000250436	9.64338e-05
116	C5H8O	84.057	0.000198802	0.000286811	0.000127943	0.00015712	5.48826e-05	2.92317e-05	0.000142465	9.47921e-05	0.000123079	6.58063e-05	0.00874463	0.00318459	0.000754005	0.00712871	0.00309993	0.00183895	0.0212285	0.000876193	0.000629637	0.00535187	0.000441774	0.00422774	0.00402253	0.00757812	0.00289682	0.0046813	0.00201789	0.00676489	0.00724308	8.49344e-05	5.28185e-05	6.88765e-05	2.27093e-05
117	C5H9NH	84.0808	0.00406963	0.00690653	0.00480005	0.00497793	0.000441049	0.000333929	0.00358819	0.00265096	0.00358505	0.00218409	0.00220273	0.0123068	0.00338051	0.00406413	0.0434774	0.0152217	0.00811339	0.00227346	0.0024618	0.00525782	0.00392674	0.00596335	0.0209211	0.00428288	0.00459228	0.0089399	0.00802077	0.00640404	0.00722175	8.49619e-05	0.000186407	0.000135685	7.17327e-05
118	C6H11H	84.0934	0.00426426	0.00973699	0.00465692	0.0020029	0.000641459	0.000309136	0.00360194	0.00350298	0.00245366	0.00245672	0.00104852	0.00134663	0.0010817	0.000266989	0.00208035	0.00220633	0.00634161	0.00101054	0.00157936	0.00445324	0.00199691	0.00115895	0.00151789	0.00297717	0.00322507	0.00221977	0.00103316	0.00225511	0.00196034	0.000155779	0.000107283	0.000131531	3.42914e-05
119	CH2Cl2H	84.9606	4.74721e-05	6.95366e-05	3.50843e-05	0.000248262	8.46279e-05	0.000255234	0.000123369	0.000100935	0.000169274	0.000106487	0	1.76288e-05	7.53351e-06	0	0	0	0	0	3.22336e-05	0.000250332	2.85745e-05	8.38744e-06	0	1.07445e-05	0.000139453	3.96464e-05	6.66976e-05	2.3526e-05	6.28283e-05	1.12506e-05	6.39329e-06	8.82193e-06	3.43462e-06
120	C4H4SH	85.0107	0.000226104	0.000117666	5.93488e-06	5.11429e-05	4.60114e-06	6.58521e-06	6.86724e-05	8.87562e-05	3.66757e-05	5.44402e-05	2.91673e-05	0	0	8.78124e-08	0.000221103	0.00092437	0	0	0.000288512	0.00267632	0.000264571	9.72242e-06	0.000381854	9.61706e-05	0.00147045	0.000489548	0.000672987	0.00022683	0.000707932	0.000236112	0.000127578	0.000181845	7.67454e-05
121	C4H4O2H	85.0284	0.00216362	0.00280058	6.94837e-05	1.01438e-05	0.000288516	0.000182182	0.000919087	0.00123106	0.00028124	0.000916564	1.99751	0.263259	0.00373568	0.503054	0.261111	0.166309	1.04428	0.010045	0.0053668	0.33235	0.00217905	0.754835	0.310158	0.35323	0.167264	0.396372	0.251846	0.716269	0.842829	0.0211042	0.0153453	0.0182248	0.00407218
122	C5H8OH	85.0648	0.0984441	0.28061	0.0347957	0.0442023	0.0189404	0.00699306	0.0806642	0.102922	0.0450195	0.064827	2.29438	0.592312	0.00842115	1.87294	0.937053	0.218367	2.97734	0.00725955	0.0101128	0.885351	0.00305022	0.965037	1.00945	0.998236	0.4442	0.854231	0.274004	1.23587	1.20679	0.00420407	0.00398158	0.00409283	0.000157322
123	C6H12H	85.1012	2.37549	4.42656	1.28357	0.9643	0.234277	0.0660099	1.55837	1.63114	0.971844	1.08148	3.97107	1.86922	0.333815	5.26697	2.66114	1.26923	12.1406	0.420319	0.531476	3.87877	0.706685	2.05804	3.06578	4.36414	2.29273	2.94517	1.03934	3.77083	3.98259	0.0274327	0.0194182	0.0234254	0.00566704
124	C3H3NO2H	86.0237	9.18454e-06	1.3248e-05	1.75078e-06	9.08185e-07	3.04132e-06	1.18769e-05	6.6683e-06	5.42716e-06	3.89695e-06	5.20403e-06	0.0061267	0.000455047	0.000379572	0.00765399	0.00296375	0.00133271	0.00662084	0	0.000828034	0.00119564	0.000134377	0.00232044	0.00398348	0.00248296	0.000665007	0.00236297	0.00135712	0.0029825	0.00301108	0	3.41567e-05	1.70784e-05	2.41525e-05
125	C4H7NOH	86.06	0.00101468	0.00156438	0.000567656	0.000563253	6.92762e-05	7.16076e-05	0.000641809	0.000575286	0.000470409	0.000383435	0.00393297	0.00168506	0.000240524	0.0115751	0.00312434	0.00105746	0.0170539	0	0.00116451	0.00345927	0	0.00195285	0.0052523	0.00607279	0.00172964	0.00375189	0.00223337	0.00458409	0.00585115	0.000146434	7.34148e-05	0.000109924	5.1632e-05
126	C5H9OH	86.0726	0.000172779	0.000145842	0.000137379	8.26732e-05	3.36867e-05	2.24338e-05	9.91321e-05	6.2458e-05	8.17923e-05	4.71808e-05	0.000361181	0.000306823	1.67534e-05	0.00110306	0.00114525	0.000632409	0.00720966	0	0.000305986	0.00263888	0.000276161	0.000228252	0.000960237	0.00250522	0.00145752	0.00128781	0.000955832	0.00153821	0.00253637	5.74035e-05	4.32515e-05	5.03275e-05	1.0007e-05
127	C5H11NH	86.0964	0.000320544	0.000374862	0.000548805	0.000413599	0.000132222	0.000119468	0.00031825	0.00016708	0.000345973	0.000160039	0.000203525	0.000447426	0.000907242	0.00146157	0.00241397	0.00270874	0.00867336	0	0.00148162	0.00600291	0.00173463	0.000519398	0.00219476	0.003385	0.00386877	0.00249198	0.00149136	0.00225827	0.00312853	0.000151098	8.82154e-05	0.000119657	4.44649e-05
128	CHClF2H	86.9808	5.45377e-05	0.000104031	1.84235e-05	2.56164e-05	1.99724e-06	7.68394e-06	3.53816e-05	3.83256e-05	2.22191e-05	2.46831e-05	0	0	5.63255e-05	0	0	0	0.00109058	0	6.27482e-05	0.000363665	0.000174046	1.87752e-05	0	0.000384441	0.000268856	0.000168018	0.000189306	0.000214347	0.000392529	8.97445e-06	1.41315e-05	1.1553e-05	3.64656e-06
129	C3H2O3H	87.0077	2.26533e-05	0	7.21589e-06	0	1.80561e-05	1.30296e-05	1.01591e-05	9.39984e-06	6.86057e-06	8.10885e-06	0	0	0.00119498	0	0.00111537	0.00329595	0	0.000698697	0.0012262	0.00363406	0.00096841	0.000398326	0.00147044	0.000641634	0.00230123	0.00120291	0.000864151	0.000591088	0.0011459	3.99709e-05	3.61479e-05	3.80594e-05	2.70325e-06
130	C4H6O2H	87.0441	0.0106902	0.036684	0.00370253	0.00208193	0.00265777	0.000382813	0.00936655	0.0138482	0.00403326	0.00904085	3.38487	0.782925	0.00932483	2.01077	1.19379	0.362538	3.49197	0.0159651	0.0130287	2.81274	0.0045346	1.39237	1.18903	1.17366	1.40864	1.29092	0.126862	1.73937	1.58243	0.0102796	0.00881389	0.00954672	0.00103638
131	C5H10OH	87.0804	0.0636993	0.22852	0.0294453	0.0423726	0.0280136	0.0104895	0.06709	0.0810305	0.0417755	0.0493378	0.722493	0.358863	0.0140984	0.676371	0.467587	0.141735	1.22377	0.0140261	0.0173978	0.252572	0.0117758	0.365151	0.428565	0.418399	0.132174	0.336072	0.138748	0.473154	0.441781	0.00104484	0.00188105	0.00146294	0.000591292
132	C6H14H	87.1168	0	0	1.30675e-05	1.59221e-05	4.24717e-05	7.44654e-06	1.31513e-05	1.5785e-05	1.69752e-05	1.24131e-05	3.73679e-06	1.85524e-06	7.99073e-05	0.00131067	0.000473807	0.000537092	0.00163911	0	9.13821e-05	0	8.66384e-05	2.84998e-05	0.000773855	0.00057683	4.33192e-05	0.000355626	0.000377886	0.000327031	0.000610517	3.13798e-06	1.04599e-06	2.09199e-06	1.47926e-06
133	C2HNO3H	88.0029	1.96805e-05	2.41203e-05	7.65589e-06	2.66205e-06	4.50101e-06	3.91482e-06	1.04224e-05	9.15022e-06	5.56972e-06	7.07331e-06	5.05806e-05	0	2.62338e-05	0	0.000104069	2.35097e-05	0.000626244	0	5.08965e-05	0.00149594	2.54212e-05	2.56048e-05	4.25263e-05	0.000225714	0.00076068	0.000263631	0.00034353	0.000216007	0.000404599	3.80897e-06	7.34754e-06	5.57826e-06	2.50215e-06
134	C3H3O3H	88.0155	2.60232e-05	3.82937e-05	8.96466e-06	3.58091e-06	6.70744e-06	4.29889e-06	1.46448e-05	1.4237e-05	7.43853e-06	1.06541e-05	0.000208789	4.30886e-05	2.41081e-06	0.000332536	0.00023575	0.000220872	0.000762162	0	6.79677e-05	0.00126014	0.000151188	8.47628e-05	0.000263052	0.00027671	0.000705663	0.000332547	0.000263666	0.000287984	0.000361181	2.06598e-05	1.90481e-05	1.98539e-05	1.13967e-06
135	C3H6NO2	88.0393	0.000826833	0.00210545	0.000335143	0.00026733	0.000186654	8.71403e-05	0.000634759	0.00076489	0.000339479	0.000500317	0.0268343	0.00802219	0.00148811	0.050654	0.0152056	0.0109494	0.0679202	0.00212503	0.00132219	0.0128419	0.00052763	0.0121149	0.025603	0.0237891	0.00668478	0.0170479	0.00913533	0.0214182	0.0234896	0.000925265	0.000722739	0.000824002	0.000143208
136	C4H9NOH	88.0757	0.000388131	0.000824812	0.000446554	0.000424554	0.000105356	0.000208407	0.000399636	0.000247749	0.000362964	0.000166891	0.00116741	0.001293	0.000115566	0.00139081	0	0	0.0020918	9.78959e-05	0.000114798	0	0	0.000858658	0.000463603	0.000768165	0	0.000522607	0.000387225	0.000889243	0.000833656	0.000613979	0.000399739	0.000506859	0.000151491
137	C3H4O3H	89.0233	0.00114621	0.00187096	0.000257895	1.7105e-05	0.000307213	0.00014983	0.000624868	0.000728717	0.00024572	0.000557842	0.7208	0.037128	0.0010576	0.0540285	0.0175871	0.047307	0.201972	0.00140474	0.000944859	0.0124064	0	0.252995	0.0396409	0.0681072	0.0062032	0.0917366	0.110442	0.208136	0.311464	0.00057009	0.00207898	0.00132454	0.00106695
138	C4H8O2H	89.0597	0.00692675	0.0127229	0.00497114	0.00283476	0.00255052	0.00627843	0.00604741	0.00371742	0.00429867	0.00292125	0.863868	0.548107	0.0852832	0.490574	1.22366	0.412357	0.886454	0.0991429	0.0448827	0.225426	0.00183816	0.499086	0.708862	0.343493	0.113632	0.416268	0.251234	0.514148	0.374015	0.00382444	0.00279872	0.00331158	0.000725298
139	C5H12OH	89.0961	0.0273725	0.105013	0.0152107	0.0172846	0.00775678	0.00266631	0.0292172	0.0380852	0.0174083	0.0231664	0	0	0	0.000337591	0	0	0.000337196	0	0	0	0	0	0.00011253	0.000112399	0	5.62322e-05	6.49314e-05	6.23923e-05	0.0001311	0	0	0	0
140	C2H3NO3H	90.0186	0.000595486	0.000719706	0.000104459	0	0.000297739	0.000297045	0.000335739	0.000277147	0.000162097	0.000259299	0.00950338	0.00113696	0.00096975	0.0038387	0.00382058	0.00422199	0.00404182	0.00033339	0.00128582	0	0.00023204	0.00387003	0.00396042	0.00188701	0.00011602	0.00245837	0.00183139	0.00345032	0.00371433	0	0.000104506	5.2253e-05	7.38969e-05
141	C3H7NO2H	90.055	0.000319495	0.000665658	0.000200679	0.000169468	3.62866e-05	2.66207e-05	0.000236368	0.000237055	0.000159612	0.000153713	0.00248309	0.000782236	0.000367131	0.00355689	0.0017477	0.000790564	0.00781746	0	0.000135771	0.000943614	8.30891e-05	0.00121082	0.00203172	0.00265108	0.000513351	0.00160174	0.000935129	0.00218409	0.00268165	4.13369e-05	6.07698e-05	5.10534e-05	1.37412e-05
142	C2H2O4H	91.0026	0.000425032	0.000227115	0.000568408	0.00055673	0.00100616	0.00108591	0.000644892	0.000335114	0.000691371	0.000252861	0.00454938	0.00231409	0.00510975	0.00165737	0.00420775	0.00497184	0.0249399	0.0129763	0.00248836	0.00331543	0.00363911	0.00399107	0.00361232	0.0134682	0.00347727	0.00613721	0.00489215	0.00807212	0.00815883	0.000365745	0.00030261	0.000334177	4.46431e-05
143	C3H6O3H	91.039	0.00400118	0.00484068	0.00182993	0.000750945	0.000484541	0.000806932	0.00211903	0.00186001	0.00120607	0.00138916	0.0241804	0.00290984	0.000974135	0.0136431	0.0118691	0.00698251	0.00869447	0	0.0015099	0.00268897	0.00122391	0.0093548	0.0108316	0.00340146	0.00195644	0.00638607	0.00436293	0.00857394	0.00944443	0	0.000340264	0.000170132	0.000240603
144	C7H6H	91.0542	0.883738	1.69483	0.455581	0.450287	0.0756056	0.0265806	0.597771	0.620677	0.396955	0.402804	0.816874	0.286883	0.0167514	0.940546	0.429369	0.131566	1.64617	0.01156	0.0284892	0.699538	0.0169956	0.373503	0.500494	0.562072	0.358267	0.448584	0.0989418	0.585015	0.575544	0.00172988	0.00240596	0.00206792	0.000478059
145	C4H10SH	91.0576	0.081377	0.0930995	0.00519235	0.0105181	0.00282939	0.000528808	0.0322575	0.0428773	0.0126116	0.0294799	0.0630889	0.017047	0.00133825	0.0237336	0.0142053	0.00484696	0.147744	0.00234017	0.00355009	0.0507606	0.00303659	0.027158	0.014262	0.0512114	0.0268986	0.0298825	0.0154407	0.0458402	0.0523508	0.000269827	0.000292632	0.00028123	1.61252e-05
146	C4H10O2H	91.0754	0.00422818	0.016654	0.00419656	0.00545109	0.000839084	0.00011192	0.00524681	0.00596828	0.00414146	0.00363187	0.000460944	0.000671089	0	0.0126206	0.00481461	0.00220188	0.00292264	0	3.37238e-05	0	0	0.000377344	0.00654569	0.000985455	0	0.00197712	0.00307265	0.00116357	0.00240633	1.36046e-05	8.1638e-06	1.08842e-05	3.84726e-06
147	C2H5NO3H	92.0342	0.000967617	0.00128594	0.000373407	0.000200798	6.96274e-05	2.60843e-05	0.000487245	0.000519759	0.000258343	0.000364388	0.0290306	0.00481328	0.000869028	0.0100391	0.0138617	0.00629271	0.0190303	0.000200203	0.000816122	0.00420654	0.000398652	0.011571	0.0100645	0.00668222	0.0023026	0.00765507	0.00411238	0.0116091	0.0120465	0.000892785	0.000364652	0.000628718	0.000373446
148	C7H8	92.062	0.228221	0.46214	0.156177	0.146899	0.0288444	0.0105618	0.17214	0.164182	0.125993	0.106791	0.039923	0.0148204	0.0056376	0.0463433	0.0276601	0.0140736	0.0649142	0.00310991	0.0107822	0.0278934	0.0108352	0.020127	0.029359	0.0262688	0.0193643	0.0237798	0.00483605	0.027938	0.0212557	0.000656456	0.00051016	0.000583308	0.000103447
149	C3H5OClH	93.0102	0	5.51241e-06	0.000949392	0.000793554	0.00067328	0.00156888	0.000665104	0.000598603	0.000865257	0.000426036	0	0	0.000200912	0	0	0	0	0	0.000246939	0	9.07344e-06	6.69707e-05	0	8.23129e-05	4.53672e-06	3.84551e-05	4.22922e-05	2.78496e-05	7.33392e-05	0	4.99669e-05	2.49834e-05	3.53319e-05
150	C2H4O4H	93.0182	3.42772e-05	1.40491e-05	0	0.0018838	2.85826e-06	0	0.000322497	0.00076499	0.000802717	0.00104618	0.000350874	5.12224e-05	6.56339e-06	0	0	3.8545e-05	0	0.000154851	0	0.000242726	9.33393e-05	0.00013622	1.28483e-05	5.16168e-05	0.000168032	9.21794e-05	7.21849e-05	0.000131587	0.000142988	0	1.5248e-06	7.62399e-07	1.0782e-06
151	C6H4OH	93.0335	0.00834474	0.00600422	0.000436111	0.0024826	0.00324879	0.0023078	0.00380404	0.00286688	0.00251743	0.00203434	0.0466591	0.0123533	0.000458133	0	0.00428413	0.00254256	0	0.00206329	0.00592145	0.0117988	0.00574602	0.0198235	0.00227556	0.00266158	0.0087724	0.00838327	0.00818683	0.0148019	0.0191262	0.0157232	0.00903188	0.0123775	0.00473147
152	C7H8H	93.0699	23.9319	47.0025	14.3869	13.6555	2.67715	0.979508	17.1056	16.8994	11.9495	10.9742	2.71361	1.33903	0.486949	3.57531	1.9134	1.143	5.79812	0.315431	0.778473	2.47631	0.889235	1.5132	2.21057	2.29734	1.68277	1.92597	0.386626	2.25967	1.80608	0.0626021	0.054264	0.0584331	0.00589593
153	C5H3NOH	94.0287	0.000380516	0.00018117	1.38996e-05	7.60824e-05	2.62141e-05	2.58e-05	0.00011728	0.000143123	6.25942e-05	8.71745e-05	0.00406678	0.00207212	0.00106616	0.00336075	0.00928385	0.00437381	0.00357487	0.000452146	0.000707782	0.00141898	0.00054358	0.00240169	0.0056728	0.00157827	0.000981282	0.00265851	0.0020922	0.00249939	0.00173962	7.21376e-05	5.53331e-05	6.37354e-05	1.18826e-05
154	C6H5OH	94.0413	0.000513728	0.000564111	4.76869e-06	0.000158662	3.98796e-05	9.94883e-05	0.000230106	0.000245409	0.000130671	0.000165915	0.0447146	0.00666373	0.00150916	0.0265595	0.0214068	0.00869808	0.0226388	0.000538743	0.00124335	0.0116636	0.00104845	0.0176292	0.0188881	0.00814029	0.00635601	0.0127534	0.00641912	0.0174119	0.0175595	0.00020083	0.000143157	0.000171993	4.07812e-05
155	C2H6S2H	94.9984	8.19346e-06	2.45251e-05	1.90975e-07	4.46817e-05	5.29704e-06	3.41152e-05	1.95006e-05	1.77503e-05	2.64648e-05	2.02446e-05	0	0	0	0	0	0	0	0	0	0	0	0	0	0	0	0	0	0	0	0	0	0	0
156	C5H2O2H	95.0128	8.1875e-06	0	2.13371e-06	1.63913e-05	6.01467e-05	4.97008e-05	2.276e-05	2.5768e-05	2.45909e-05	2.13605e-05	0	0.000126821	0.000114166	0	0	0.000409927	0.000282208	0	0.000369645	2.98829e-05	0.000156452	8.03289e-05	0.000136642	0.000217285	9.31676e-05	0.000131856	6.18406e-05	0.000110014	0.000121542	0.000380145	0.000196913	0.000288529	0.000129565
157	C2H6O2SH	95.0161	0.00243635	0.00135583	0.00015477	0.000397444	0.000767193	0.000441098	0.000925447	0.000848578	0.000519258	0.000590645	0.00300996	0.00357055	0.000594768	0	0	0.00138053	0.00442067	0.00232715	0.00303725	0.0102502	0.00221565	0.00239176	0.000460177	0.00326169	0.00623291	0.00308663	0.00240214	0.00332078	0.00217743	0.0027417	0.00163245	0.00218708	0.000784361
158	C2H6O4H	95.0339	0.00328499	0.00223209	0.00138461	0.0024044	0.00223816	0.00151664	0.00217681	0.000685577	0.00206544	0.000496768	0.00252651	0.00555928	0.00340329	0.0164724	0.00230396	0.00663775	0	0.0121641	0.0158027	0.000598962	0.0130114	0.00382969	0.00847138	0.00932227	0.00680517	0.00710713	0.00242217	0.00556739	0.00540316	0.00283844	0.00236161	0.00260003	0.00033717
159	C6H6OH	95.0491	0.475335	1.24567	0.227177	0.201869	0.030774	0.0255064	0.367722	0.460496	0.208196	0.293481	4.14379	0.574716	0.0199006	2.3185	1.05433	0.233879	2.68374	0.0261348	0.0282812	1.2403	0.026122	1.57947	1.20224	0.91272	0.633213	1.08191	0.404968	1.6578	1.73611	0.00586734	0.00529271	0.00558003	0.000406327
160	C5H6N2H	95.0604	0.00848491	0.031027	0.00334035	0.00244969	0.00040317	0.000446421	0.00769192	0.0118084	0.00346115	0.00749249	0.132152	0.00634039	0.00058827	0.0397051	0.0173021	0.00404739	0.0113281	0	0.000874876	0.0231195	0.00197378	0.0463601	0.0203515	0.00406766	0.0125466	0.0208315	0.0182721	0.0366721	0.0552577	0.000274313	0.000174342	0.000224327	7.06896e-05
161	C7H10H	95.0855	0.156935	0.407325	0.066708	0.0811875	0.00966693	0.00224218	0.120677	0.151198	0.0721235	0.0950113	4.1187	1.3691	0.385912	4.02199	1.89985	1.17049	8.94637	0.319143	0.469994	3.18507	0.935139	1.9579	2.36411	3.24517	2.06011	2.40682	0.584919	3.12306	2.97851	0.00356025	0.00427758	0.00391891	0.000507227
162	C5H3O2H	96.0206	6.26775e-05	4.71314e-05	9.58928e-06	1.35971e-05	1.73784e-05	1.09042e-05	2.68796e-05	2.24165e-05	1.59812e-05	1.55679e-05	0.0114602	0.00141992	1.66642e-05	0.00535237	0.00491764	0.00151121	0.00479932	0	0.000148064	0.00300892	0.000336851	0.00429891	0.00392707	0.00164913	0.00167289	0.002887	0.0014238	0.00414873	0.00454311	8.53443e-05	6.20751e-05	7.37097e-05	1.64538e-05
163	C5H5NOH	96.0444	0.00138997	0.00110989	0.000598259	0.000423057	7.96475e-05	8.44927e-05	0.000614218	0.000538637	0.00041107	0.000363585	0.0106742	0.0048244	0.000206543	0.0091976	0.0110312	0.000978387	0.00987521	0.00048405	0.000395981	0.00292539	0.000353093	0.00523506	0.00706905	0.00358508	0.00163924	0.00438211	0.00231702	0.005677	0.00456183	0.000157235	0.00011178	0.000134508	3.21418e-05
164	C6H9NH	96.0808	0.00116007	0.00155579	0.00125457	0.0016215	0.000216491	5.77793e-05	0.0009777	0.00067591	0.00107595	0.00065353	0.00160948	0.00252772	0.000733324	0.00554646	0.0048949	0.00227774	0.00643888	0.000646188	0.000739795	0.00396719	0.00131181	0.00162351	0.0042397	0.00260829	0.0026395	0.00277775	0.00108281	0.00262638	0.00201151	3.50094e-05	0.000116004	7.55069e-05	5.72721e-05
165	C7H11H	96.0934	0.00264228	0.00322131	0.00136895	0.00128948	0.000228747	6.72892e-05	0.00146968	0.00126431	0.00107946	0.000858386	0.00844034	0.00558328	0.00188529	0.0126654	0.00853655	0.00588472	0.0374578	0.00176607	0.00311458	0.0190801	0.0046916	0.00530297	0.00902891	0.0141128	0.0118859	0.0100826	0.00380568	0.0114771	0.0120477	5.30718e-05	5.13767e-05	5.22242e-05	1.19858e-06
166	C2H2Cl2H	96.9606	0	0	0.000147095	0.000314437	0.00339175	0.000380807	0.000705681	0.00132526	0.00074459	0.00113711	0	0	0	0	0	0	0	0	0.000419735	0.00431089	0.0024363	0	0	0.000139912	0.0033736	0.000878377	0.00166479	0.000471736	0.00125502	0	3.40022e-05	1.70011e-05	2.40432e-05
167	C5H4SH	97.0107	0	0	1.82432e-05	0	3.32802e-05	3.84019e-05	1.49875e-05	1.7705e-05	1.45593e-05	1.58347e-05	0	0.00167022	0.000737134	0.00235598	0	0.00460908	0	0.00667738	0.0029492	0	0	0.000802451	0.00232169	0.00320886	0	0.00158325	0.00144962	0.00139635	0.00216816	0	0	0	0
168	C5H4O2H	97.0284	0.00835468	0.0198644	0.00309899	0.00269127	0.000968315	0.00129064	0.00604471	0.0072748	0.00322925	0.00476071	2.7862	0.499455	0.0239648	1.16937	1.08283	0.319488	1.3791	0.0188501	0.016189	0.579148	0.011833	1.10321	0.85723	0.47138	0.295491	0.681827	0.366001	1.05027	1.1203	0.00711717	0.00697658	0.00704687	9.94119e-05
169	C6H8OH	97.0648	0.06198	0.156992	0.018841	0.0140455	0.0053995	0.00129059	0.0430914	0.059883	0.0195256	0.0394314	3.28422	0.704367	0.00125552	2.22362	0.937098	0.187523	3.49768	0.00516057	0.00561891	1.1087	0.00294426	1.32995	1.11608	1.16948	0.555823	1.04283	0.337154	1.58888	1.58453	0.0049795	0.00456613	0.00477282	0.000292293
170	C7H12H	97.1012	1.14774	2.17788	0.511035	0.518267	0.101819	0.0253206	0.74701	0.806609	0.469951	0.524029	6.89416	2.94812	0.618591	8.52476	3.94297	2.15834	17.9973	0.595793	0.829206	6.0789	1.46517	3.48696	4.87536	6.47412	3.77204	4.65212	1.35421	5.93475	5.90366	0.0127867	0.0130359	0.0129113	0.000176213
171	C4H3NO2H	98.0237	0.000241789	0.000603212	0.000150135	0	7.06778e-07	0	0.000165974	0.000236467	6.31832e-05	0.000170314	0.019716	0.0120145	0.00761466	0	0	0	0.0126629	0.0102232	0.00301497	0.00178002	0.00476476	0.0131151	0	0.00863368	0.00327239	0.00625528	0.00579481	0.011025	0.00777218	0.00041592	0.000157805	0.000286862	0.000182515
172	C5H7NOH	98.06	0.000791257	0.00119911	0.000479956	0.000745814	7.5418e-05	2.42247e-05	0.00055263	0.000452642	0.000501735	0.000340159	0.00141372	0.00425585	0.000423981	0.0048828	0.00174998	0.000635007	0.00734255	0.000221179	0.000151147	0.00167416	0	0.00203118	0.0024226	0.00257162	0.00083708	0.00196562	0.000786123	0.00257913	0.00260022	0.000128605	6.65053e-05	9.75552e-05	4.39111e-05
173	C6H10O	98.0726	0.000276697	0.000495834	0.000233414	0.000275176	5.19732e-05	4.67617e-05	0.000229976	0.000167434	0.0002074	0.000119156	0.00324533	0.00360977	0.00018939	0.00528086	0.00435849	0.00189823	0.0173962	0.000138818	0.000314658	0.00547893	0.000118772	0.00234817	0.00384586	0.00594991	0.00279885	0.0037357	0.00160393	0.00478414	0.00579919	6.98907e-05	4.70047e-05	5.84477e-05	1.61829e-05
174	C6H11NH	98.0964	0.000972749	0.00153024	0.00168002	0.00331617	0.000260871	0.000142402	0.00131708	0.00116512	0.00189061	0.00145422	5.67963e-05	0.00675062	0.0020747	0.00039445	0.0338684	0.00907335	0.00324017	0.00176229	0.00206874	0.00389261	0.00302825	0.00296071	0.0144454	0.00235707	0.00346043	0.0058059	0.0057773	0.00347267	0.0056141	6.91527e-05	8.0861e-05	7.50068e-05	8.279e-06
175	C2H4Cl2H	98.9763	5.43761e-05	9.32718e-05	8.25347e-06	4.1034e-05	3.58746e-06	2.2865e-05	3.72313e-05	3.35469e-05	2.89313e-05	2.28788e-05	0	0	0	0	0	0	0.00184376	0	0	0.000260473	0	0	0	0.000614588	0.000130237	0.000186206	0.000292112	0.000306401	0.000677267	0	4.83786e-06	2.41893e-06	3.42088e-06
176	C3H2N2SH	99.0011	0	0	0	0	0	0	0	0	0	0	0	0	0.000130905	0.00517061	0.00129564	0.00375307	0	0.00174483	0	0	0	4.36349e-05	0.00340644	0.000581609	0	0.00100792	0.00162074	0.00042438	0.00119844	0	0	0	0
177	C4H2O3H	99.0077	0.000370217	0.000522551	0	0	0	0	0.000148795	0.000235491	3.46213e-05	0.000168037	2.29909	0.884433	0.013171	0.759066	1.11777	0.421797	1.63173	0.093886	0.028994	0.353144	0.0444474	1.06557	0.766212	0.58487	0.198796	0.653861	0.362385	1.03135	0.953582	0	0	0	0
178	C5H6SH	99.0263	0	4.36936e-05	0	1.67041e-05	0	0	1.00663e-05	1.77774e-05	9.06544e-06	1.11048e-05	0.0374103	0.0385195	0.000987041	0.0328606	0.0513301	0.0200629	0.0188979	0.00405263	0.00124524	0.00898157	0.00367549	0.025639	0.0347512	0.00806525	0.00632853	0.018696	0.0138075	0.0220382	0.0162672	0	0	0	0
179	C5H6O2H	99.0441	0.000128951	0.000677201	0.000459935	5.16076e-06	0.000318755	0.000272474	0.000310413	0.00023854	0.000215728	0.000226155	1.62003	0.23349	0.000798069	0.553161	0.26152	0.10049	1.04862	0.0032815	0.00170761	0.238544	0	0.618105	0.305057	0.351204	0.119272	0.34841	0.205854	0.617908	0.702225	0.00856591	0.00585429	0.0072101	0.0019174
180	C6H10OH	99.0804	0.021579	0.067798	0.00791411	0.0103914	0.00794064	0.00260881	0.0197053	0.024384	0.0112561	0.0153021	1.13557	0.292425	0.00149762	0.963773	0.383184	0.0872934	1.69393	0.00333758	0.00453321	0.436984	0.00215505	0.476498	0.478084	0.567267	0.21957	0.435354	0.149981	0.644929	0.658065	0.00231543	0.00216596	0.00224069	0.000105685
181	C7H14H	99.1168	0.128059	0.230632	0.0861896	0.0656467	0.0166177	0.00900729	0.0893588	0.0821898	0.0625413	0.0547625	1.54889	0.714455	0.101064	1.96697	1.01152	0.441773	4.95451	0.179119	0.170972	1.35849	0.245339	0.788138	1.14009	1.7682	0.801913	1.12459	0.458911	1.48481	1.6387	0.00624404	0.00618886	0.00621645	3.90145e-05
182	C4H5NO2H	100.039	0.000110249	0.00111551	0.00013149	6.45052e-05	8.37001e-05	4.39224e-05	0.00025823	0.000421145	0.000125753	0.000254065	0.0103173	0.00318992	0.000763809	0.00962518	0	0	0.0110979	0	0.000466378	0	0	0.00475699	0.00320839	0.00385475	0	0.00295503	0.00206986	0.00503323	0.00522875	3.39234e-05	1.13078e-05	2.26156e-05	1.59917e-05
183	C5H9NOH	100.076	0.000893978	0.00134231	0.000540719	0.000488135	0.000357609	0.000109037	0.000621964	0.000435976	0.000470055	0.000293066	0.00150254	0.00167227	9.56465e-05	0.00536179	0.0009454	0.000324703	0.00890417	1.78381e-05	0.000861587	0.00137138	0	0.00109015	0.00221063	0.0032612	0.000685692	0.00181192	0.00116171	0.00235296	0.00303323	0.000175016	5.83388e-05	0.000116678	8.25035e-05
184	C6H12O	100.088	0.000127698	0.000199141	8.18927e-05	8.46605e-05	5.74112e-05	2.98789e-05	9.67804e-05	5.97125e-05	7.79008e-05	3.91908e-05	0.000447485	0.000265168	1.99249e-05	0.00109685	0.00121968	0.000476267	0.00597774	0	0.000117707	0.00176373	0	0.000244193	0.000930931	0.00203182	0.000881867	0.0010222	0.000742214	0.00127211	0.00209386	7.58357e-05	3.71103e-05	5.6473e-05	2.7383e-05
185	C6H13NH	100.112	0.000187628	0.000361657	0.000236734	0.000235928	4.33526e-05	5.41407e-05	0.000186574	0.000121374	0.000182452	9.36704e-05	7.81084e-05	0.000234315	0.000334558	0.0018067	0.00122261	0.00130066	0.00608472	0	0.000719158	0.00373217	0.00105923	0.000215661	0.00144332	0.00226796	0.0023957	0.00158066	0.00100312	0.00148099	0.00219042	8.37774e-05	5.44948e-05	6.91361e-05	2.07059e-05
186	CCl2F	100.936	1.01211e-05	0.000249633	0.000142427	0.000278568	1.79564e-05	0.000147311	0.000141003	0.000112283	0.000182666	0.000106927	0	0	0	0	0	0	0.00503228	0	0	0.000748712	0	0	0	0.00167743	0.000374356	0.000512946	0.000796126	0.000838735	0.00184796	0	5.71099e-07	2.85549e-07	4.03828e-07
187	C2F4H	101.001	1.41907e-05	2.44993e-05	7.21402e-06	9.13509e-06	1.20956e-06	5.92292e-06	1.03619e-05	8.11677e-06	7.89045e-06	5.28699e-06	0	0	2.15472e-05	0	0	0	0.00153633	0	8.90513e-06	0	0	7.18239e-06	0	0.000515078	0	0.000130565	0.000256364	0.000243244	0.000569329	0	1.19483e-06	5.97417e-07	8.44875e-07
188	C4H4SOH	101.006	1.94387e-05	3.09134e-05	2.11048e-05	3.73494e-05	2.93148e-06	2.07549e-05	2.20821e-05	1.17263e-05	2.55383e-05	1.26451e-05	0	0	6.12027e-05	0	0	0	0.000879013	0	2.33609e-05	0.000488904	0	2.04009e-05	0	0.000300791	0.000244452	0.000141411	0.000153471	0.000175481	0.000327898	1.33215e-05	1.09231e-05	1.21223e-05	1.69594e-06
189	C4H4O3H	101.023	0.000242267	0.000385334	0	0	3.19251e-05	3.35734e-05	0.000115517	0.000160784	3.47276e-05	0.000118722	0.330764	0.134587	0.000247892	0.0131682	0.0141785	0.0216251	0.0381176	0	0	0.00735281	0	0.155199	0.0163239	0.0127059	0.00367641	0.0469764	0.0723444	0.107315	0.144263	0	0.000139971	6.99856e-05	9.89745e-05
190	C5H8O2H	101.06	0.00330019	0.00732935	0.00106951	8.36363e-05	0.000726615	0.000455843	0.00216086	0.00277422	0.000851339	0.00201725	2.17885	0.481165	0.00377587	1.25172	0.551427	0.187306	2.80635	0.0119897	0.00814461	0.632122	0.000246643	0.887931	0.663485	0.942161	0.316184	0.70244	0.284361	1.1202	1.17055	0.0124965	0.00876425	0.0106304	0.00263908
191	C6H12OH	101.096	0.0499495	0.147684	0.0232163	0.0276391	0.0214224	0.00727269	0.0461974	0.0516045	0.0287586	0.0322501	0.551313	0.277617	0.00965615	0.53873	0.336375	0.0917508	1.07529	0.0129174	0.011787	0.247511	0.00991973	0.279529	0.322285	0.366665	0.128715	0.274299	0.10337	0.387691	0.377489	0.00144518	0.00231048	0.00187783	0.000611858
192	C7H16H	101.132	1.03938e-06	2.19761e-06	1.90763e-05	2.19284e-05	4.75282e-05	1.31254e-05	1.74825e-05	1.70179e-05	2.24642e-05	1.30352e-05	0	5.50172e-05	4.17923e-05	0.00181152	0.000926842	0.000479096	0.0023275	0	4.07325e-05	0	7.03177e-05	3.22698e-05	0.00107249	0.00078941	3.51589e-05	0.000482331	0.000530754	0.000460522	0.000867664	0	1.99622e-06	9.98109e-07	1.41154e-06
193	C3H3NO3H	102.019	8.75657e-05	9.9238e-05	0	3.36127e-06	7.66746e-06	7.20887e-06	3.41735e-05	4.61107e-05	1.08196e-05	3.3518e-05	0.0118223	0.00187661	0.000266305	0.00293454	0.00161514	0.000791537	0.00528691	8.56806e-06	7.21055e-05	0.00116062	0	0.00465506	0.00178041	0.00178919	0.000580308	0.00220124	0.00173162	0.00411399	0.00494181	0	5.30471e-05	2.65235e-05	3.751e-05
194	C8H6	102.046	0.000989295	0.0020584	0.000597797	0.000993278	8.23949e-05	1.51094e-05	0.000789379	0.00075206	0.000673694	0.000517872	0.0053446	0.0012018	0.000116434	0.00582782	0.00241306	0.00139849	0.00667365	0.000249309	0.000249204	0.00274361	0.000276791	0.00222094	0.00321313	0.00239072	0.0015102	0.00233375	0.000699406	0.00296999	0.00265149	7.50017e-05	3.57592e-05	5.53805e-05	2.77486e-05
195	C4H8NO2	102.055	0.000105422	0.000825808	0.000159836	0.000169651	0.000106933	3.91814e-05	0.000234472	0.000293431	0.000165529	0.000165802	0.0092437	0.00323371	0.000224253	0.0175837	0.00460733	0.00218306	0.0249563	0.000612507	0.000378034	0.00499356	0.000284936	0.00423389	0.00812471	0.00864894	0.00263925	0.00591169	0.00293904	0.00768559	0.00861844	0.000784919	0.000317537	0.000551228	0.000330489
196	C5H11NOH	102.091	0.00027036	0.000423448	0.000438033	0.000403871	0.000104116	0.000107388	0.000291203	0.000155542	0.000315153	0.000144709	0.00176831	0.00165884	0.000291702	0.00265523	0	0	0.00401362	0.000910051	0.000836016	0.01582	0.000405217	0.00123962	0.000885076	0.0019199	0.00811261	0.0030393	0.00340936	0.00263161	0.0036865	0.000148689	6.47519e-05	0.000106721	5.93527e-05
197	C3H2O4H	103.003	4.13834e-06	6.13668e-06	1.39196e-06	0	1.011e-06	6.88731e-07	2.22778e-06	2.38498e-06	9.28774e-07	1.90644e-06	0	2.57925e-05	2.18383e-06	0	7.34313e-06	2.32711e-05	4.41601e-05	0	1.81361e-05	0.00011855	2.52317e-05	9.32544e-06	1.02047e-05	2.07654e-05	7.18909e-05	2.80466e-05	2.96881e-05	2.23582e-05	3.05941e-05	8.04634e-06	7.30341e-06	7.67488e-06	5.25332e-07
198	C2H2F4H	103.017	0.000103107	8.14592e-05	0	0	1.5635e-05	7.73599e-05	4.62602e-05	4.61642e-05	2.11266e-05	4.20153e-05	0	0	7.34318e-06	3.82537e-05	0	0.0001758	0.000719072	5.59881e-05	2.6815e-05	0.000128211	0	2.44773e-06	7.13512e-05	0.000267292	6.41057e-05	0.000101299	0.000114899	0.000132428	0.000257705	6.29452e-05	4.31614e-05	5.30533e-05	1.39892e-05
199	C4H6O3H	103.039	0.000512677	0.00236059	0.00134058	0.000150038	0.000286582	0.000146149	0.000799437	0.000885867	0.000508281	0.000673705	0.300527	0.024062	0.000376089	0.051728	0.0201515	0.0247214	0.126457	0.00159048	0.000788907	0.121395	0	0.108322	0.0322003	0.0429455	0.0606975	0.0610413	0.0336393	0.103748	0.124832	0.00225434	0.00259033	0.00242233	0.000237583
200	C8H6H	103.054	0.059833	0.139859	0.0271614	0.0828927	0.00238026	0.000629079	0.052126	0.0537642	0.0489708	0.0407621	0.162254	0.0339144	0.000889282	0.183487	0.0626538	0.0260252	0.363985	0.00151139	0.00780002	0.110467	0	0.0656859	0.0907221	0.124432	0.0552335	0.0840184	0.0307835	0.115128	0.12895	0.000219225	0.000254497	0.000236861	2.49413e-05
201	C5H10O2H	103.075	0.000757185	0.00150357	0.000445696	0.000868115	0.000517376	0.000215931	0.000717979	0.000448924	0.000657749	0.000310994	0.229982	0.224738	0.0174238	0.15064	0.649959	0.122523	0.290556	0.0222753	0.0135404	0.0716839	0.00285388	0.157381	0.307707	0.108791	0.0372689	0.152787	0.114457	0.167168	0.130623	0.00110487	0.00053306	0.000818963	0.000404328
202	C6H14OH	103.112	0.00126958	0.00577205	0.00264768	0.000930415	8.91108e-05	1.11529e-05	0.00178666	0.00217528	0.00121445	0.00145198	4.9599e-06	0.000339311	0.000111713	0.000855723	0.00332109	0.000783032	1.03495e-05	0.000165619	0	0	0	0.000151995	0.00165328	5.86561e-05	0	0.000465983	0.000794003	0.000194197	0.000573748	0	0	0	0
203	C3H5NO3H	104.034	0.000530489	0.000272272	0.00116698	0.000487761	0.000141166	7.97235e-05	0.000446399	0.000396473	0.000492486	0.000369655	0.00714405	0.000492557	4.95996e-05	0.00439952	0.0013901	0.000793089	0.00834271	0	2.75381e-05	0.000621727	0	0.00256207	0.00219424	0.00279008	0.000310863	0.00196431	0.0011293	0.00325264	0.00380198	7.60639e-05	3.76798e-05	5.68718e-05	2.71417e-05
204	C4H7O3H	104.047	0.00642222	0.0123651	0.00941834	0.00414596	0.00157055	0.000755858	0.00577968	0.00453091	0.00466946	0.00350196	0.00334893	0.00186616	0.000156865	0.00544659	0.00600018	0.0011078	0.00910382	0.000155628	0.000130581	0.00146797	0	0.00179065	0.00418485	0.00313001	0.000733986	0.00245988	0.0015112	0.00295603	0.00308215	0.00026724	0.000221246	0.000244243	3.25225e-05
205	C7H5NH	104.049	0.178718	0.782173	0.287188	0.0914491	0.0115939	0.00421365	0.225889	0.29277	0.13672	0.192558	0.00253161	0.0016892	6.59992e-05	0.00408669	0.00937402	0.000637562	0.00908013	9.65247e-05	0.000126176	0.00206978	0.0002059	0.00142894	0.00469942	0.00310095	0.00113784	0.00259179	0.00165001	0.00280401	0.00312969	0.000277615	0.000734572	0.000506094	0.000323118
206	C4H9NO2H	104.071	0.000652786	0.00232864	0.00152589	0.00133911	0.00025631	6.80369e-05	0.00102846	0.000859553	0.00103505	0.000634986	0.00347435	0.000309664	5.47944e-05	0.00453188	0.00196116	0.000881286	0.00749167	0	6.93586e-05	0.00196308	0	0.0012796	0.00245811	0.00252034	0.000981542	0.0018099	0.000794207	0.00234605	0.00270518	9.69893e-06	5.44218e-06	7.57055e-06	3.00998e-06
207	C3H4O4H	105.018	0.000123683	0.000541098	1.00852e-06	0	1.54058e-05	4.58864e-05	0.00012118	0.000210865	3.77222e-05	0.000139781	0	0	0	0	0	0	0	0	0	0	0	0	0	0	0	0	0	0	0	0	8.43842e-06	4.21921e-06	5.96686e-06
208	C7H4OH	105.033	0.00432719	0.0136302	0.00694373	0.0101569	0.00275239	0.00199105	0.00663357	0.0045475	0.00711897	0.00364883	0.0592744	0.0154657	0.00306822	0.0204016	0.0047059	0.00285108	0.026142	0.0155084	0.00856923	0.0255081	0.00879917	0.0259361	0.00931954	0.0167399	0.0171536	0.0172873	0.00679717	0.0259786	0.021315	0.000745877	0.000696894	0.000721385	3.46363e-05
209	C4H8O3H	105.055	0.000490416	0.00179784	0.00182293	0.00171465	0.000569077	0.000267729	0.00111044	0.000739309	0.00130181	0.000663255	0	0.000614119	0.000903412	0.0191664	0.00715709	0.00437456	0	0.00135122	0.00106925	0	0.000937019	0.000505844	0.0102327	0.000806823	0.000468509	0.00300346	0.00482186	0.00118766	0.00373281	0.000268606	0.000164773	0.00021669	7.34205e-05
210	C8H8H	105.07	1.8637	3.45475	0.691752	1.0354	0.112619	0.0645688	1.2038	1.28696	0.810919	0.829262	1.96575	0.66553	0.0183813	2.386	1.02458	0.272521	4.48518	0.0175509	0.0434008	1.59768	0.00928878	0.883219	1.2277	1.51538	0.803485	1.10744	0.3284	1.47665	1.55998	0.00172789	0.00326358	0.00249573	0.0010859
211	C2H3O4NH	106.013	9.85523e-08	0	0	0	1.53106e-06	4.55853e-07	3.47577e-07	6.06101e-07	3.09934e-07	5.47653e-07	0.00029562	6.45547e-06	3.17025e-05	9.67166e-07	0.000108132	5.28254e-05	0.00195109	0	0	0.000153546	2.38844e-05	0.000111259	5.39748e-05	0.000650363	8.87153e-05	0.000226078	0.000283837	0.000392619	0.000702403	1.20403e-05	5.59525e-06	8.81779e-06	4.55735e-06
212	C6H3NOH	106.029	1.0812e-05	3.61238e-05	2.232e-06	5.68319e-06	5.02302e-06	5.33308e-06	1.08678e-05	1.26816e-05	6.39161e-06	8.02392e-06	0.000764516	7.44247e-05	1.59609e-05	0.000565818	0.000461775	0.000156043	0.000903622	9.57997e-05	5.66669e-05	0.000262022	4.115e-05	0.000284967	0.000394546	0.00035203	0.000151586	0.000295782	0.000106188	0.000394229	0.00037173	9.09814e-06	5.28435e-06	7.19125e-06	2.69676e-06
213	C7H5OH	106.041	0.000132176	0.000166324	3.58941e-06	2.75597e-05	4.82407e-06	2.46237e-06	5.61559e-05	7.3505e-05	2.4974e-05	4.9471e-05	0.00373168	0.000682662	2.57203e-05	0.00155325	0.00158438	0.000230773	0.00273448	0	1.80417e-05	0.000949903	0	0.00148002	0.0011228	0.000917507	0.000474951	0.00099882	0.000419514	0.00155577	0.001595	2.31336e-06	3.07507e-06	2.69422e-06	5.38609e-07
214	C3H7NO3H	106.05	0.000453951	0.000605793	0.000118041	0.000200007	2.94331e-05	2.51331e-05	0.000238727	0.000239395	0.000156859	0.000157125	0.00193161	0.000155049	6.04473e-05	0.002005	0.00158391	0.000430405	0.00468578	7.12408e-05	5.69826e-05	0.00110862	0	0.000715704	0.00133977	0.00160467	0.00055431	0.00105361	0.000499678	0.00139172	0.00165561	3.47731e-05	2.09107e-05	2.78419e-05	9.80219e-06
215	C7H7NH	106.065	0.000738241	0.00213726	0.00122708	0.000997813	0.000368838	0.000164592	0.000938971	0.000705319	0.000859182	0.000475414	0.00628844	0.00283025	0.000318323	0.0136538	0.00610913	0.00267579	0.0115012	0	0.000501098	0.00665267	0.000624809	0.00314567	0.00747957	0.00400077	0.00363874	0.00456619	0.00197362	0.00481918	0.00414408	7.97049e-05	7.7382e-05	7.85435e-05	1.64252e-06
216	C8H10	106.078	0.242414	0.404983	0.137218	0.157436	0.0267331	0.00873478	0.16292	0.146918	0.124096	0.097487	0.0222709	0.0138522	0.00197754	0.0292879	0.0120702	0.00722198	0.0506338	0.00122729	0.00308187	0.0265077	0.00300085	0.0127002	0.0161934	0.0183143	0.0147543	0.0154905	0.00236612	0.0190484	0.0165959	0.000265683	0.000368284	0.000316984	7.25495e-05
217	C3H6O4H	107.034	0.0776572	0.0783621	0.0235587	0.0178999	0.000151066	1.78032e-05	0.0329411	0.0361552	0.0179893	0.0244821	0	0.000676319	0.00141774	0.00340628	0.0019976	0.00273764	0	0.000827038	0.000419512	0	0.000744254	0.000698021	0.00271384	0.000415517	0.000372127	0.00104988	0.00111868	0.000558722	0.000875749	4.3526e-05	1.82302e-05	3.08781e-05	1.78868e-05
218	C7H6OH	107.049	0.797936	2.07814	0.336929	0.624258	0.0737799	0.0179851	0.654838	0.760457	0.461295	0.475712	1.80801	0.548737	0.0863219	1.41475	1.40916	0.555517	1.5967	0.0348264	0.0907173	0.701465	0.0660906	0.814357	1.12647	0.574081	0.383778	0.724672	0.320612	0.905265	0.746382	0.00452405	0.00604016	0.0052821	0.00107205
219	C8H10H	107.086	23.1468	38.1596	11.7234	13.6489	2.30552	0.811347	14.9659	13.984	10.9331	9.20214	2.29273	1.68716	0.183776	3.22505	1.30261	0.734942	6.10748	0.123153	0.258956	2.60369	0.307393	1.38789	1.7542	2.1632	1.45554	1.69021	0.353213	2.14128	1.99385	0.0285223	0.038859	0.0336907	0.00730919
220	C2H5NO4H	108.029	8.12284e-05	4.91953e-05	1.32085e-05	3.01503e-05	6.76248e-06	1.14397e-06	3.02815e-05	3.04859e-05	2.12089e-05	1.91384e-05	0.000203493	5.75527e-05	7.99547e-06	0.000109529	0.000557594	0.000146882	0.00133999	0	3.15e-05	0	0	8.96804e-05	0.000271335	0.000457164	0	0.000204545	0.00020274	0.00028628	0.000473498	2.0728e-05	1.73225e-05	1.90252e-05	2.40809e-06
221	C6H5NOH	108.044	0.000311801	0.000152302	0.000136614	0.000164091	7.95996e-05	4.99632e-05	0.000149062	9.11272e-05	0.000132057	5.64209e-05	0.0114934	0.00316258	0.000325979	0.00958086	0.00771502	0.00233649	0.011618	0.000558282	0.000562561	0.00423762	0.000272857	0.004994	0.00654412	0.00424627	0.00225524	0.00450991	0.00178189	0.00590471	0.00506937	8.90005e-05	6.61643e-05	7.75824e-05	1.61477e-05
222	C6H4O2H	109.028	0.00549531	0.00838048	0.000311462	0.000344768	0.000152058	8.6747e-06	0.00244879	0.00359696	0.00077283	0.00252004	1.31498	0.26327	0.00439091	0.734383	0.915982	0.240565	0.725675	0.00349979	0.00711753	0.312671	0.000511587	0.527547	0.63031	0.245431	0.156591	0.38997	0.225128	0.5281	0.524286	0.00023783	0.000347073	0.000292451	7.72469e-05
223	C3H8O4H	109.05	0.00191737	0.00310013	0.00100662	0.000726275	0.000205774	0.000117284	0.00117891	0.00114411	0.00074787	0.000771776	0.017071	0.00424906	7.01323e-05	0.0279356	0.0251716	0.00801298	0.0043029	0.00031959	0.000517218	0.00344982	0	0.00713005	0.0203734	0.00171323	0.00172491	0.00773539	0.00880298	0.00706394	0.00781686	3.39682e-05	4.40251e-05	3.89967e-05	7.11131e-06
224	C7H8OH	109.065	0.112481	0.406091	0.0354736	0.0215496	0.00487048	0.00420918	0.0974458	0.15643	0.0389854	0.100709	1.26517	0.209785	0.00400851	0.73932	0.227974	0.0666084	1.10981	0.0112652	0.0088247	0.450788	0.00829307	0.492989	0.344634	0.376634	0.229541	0.360949	0.108344	0.561484	0.570527	0.00234468	0.00205973	0.0022022	0.000201492
225	C6H8N2H	109.076	0.00301948	0.0166129	0.00101142	0.000657115	0.000181658	0.000173413	0.00360933	0.00645692	0.00136548	0.00403137	0.0371861	0.00230356	0.000299026	0.0212305	0.00845681	0.00396225	0.00500342	0.000299889	0	0.00700681	0.00120435	0.0132629	0.0112165	0.00176777	0.00410558	0.00758819	0.00551885	0.0111924	0.0151543	0.000170954	0.000108451	0.000139702	4.41963e-05
226	C8H12H	109.101	0.0239247	0.0664361	0.0106109	0.0155242	0.00334326	0.000954922	0.0201323	0.0241659	0.0129959	0.0149541	3.14038	1.09093	0.264025	3.14903	1.5396	0.915086	7.33547	0.209707	0.318311	2.26102	0.646088	1.49845	1.86791	2.62116	1.45356	1.86027	0.540169	2.45089	2.44759	0.00283839	0.00361377	0.00322608	0.000548282
227	C6H2ClH	109.992	0.000163234	0.000203504	7.38713e-05	7.2437e-05	4.88214e-05	4.31323e-05	0.000100833	6.63371e-05	7.31567e-05	4.4778e-05	0.000265137	0.000190064	0.000480338	0.00029835	4.43132e-05	0.000394548	0.00622439	0	0.000443177	0.000606917	0.000787432	0.000311846	0.000245737	0.00222252	0.000697175	0.00086932	0.000923836	0.00123689	0.00219285	5.18091e-05	4.98005e-05	5.08048e-05	1.4203e-06
228	C5H3NO2H	110.024	0.00016625	0.000223226	6.91497e-05	5.70199e-06	5.60497e-06	1.91004e-06	7.86405e-05	9.50919e-05	3.18247e-05	7.19928e-05	0.00187998	0.00030504	4.9192e-05	0	0	0	0.00339835	0	5.58739e-05	0.00104226	5.1584e-05	0.000744738	0	0.00115141	0.000546923	0.000610767	0.000478662	0.00109899	0.00132196	1.95575e-05	1.19243e-05	1.57409e-05	5.3975e-06
229	C6H5O2H	110.036	1.59345e-05	3.30996e-05	1.56035e-05	3.74001e-06	4.58725e-06	2.59761e-07	1.22041e-05	1.21196e-05	7.28615e-06	9.15017e-06	0.0102681	0.00137233	0.000105085	0.0036566	0	0	0.00452989	0.000156921	0.000134058	0.00193634	9.99216e-05	0.00391517	0.00121887	0.00160696	0.00101813	0.00193978	0.00133942	0.00359168	0.00428469	1.9565e-05	1.57796e-05	1.76723e-05	2.67667e-06
230	C6H7NOH	110.06	0.000432508	0.000429953	0.00028403	0.000278489	2.8544e-05	4.02237e-05	0.000248958	0.000179279	0.000215555	0.000131636	0.0039786	0.00115131	3.12148e-06	0.00453761	0.00232524	0.000253697	0.00603173	8.3394e-05	2.08419e-05	0.00130317	0	0.00171101	0.00237218	0.00204532	0.000651584	0.00169503	0.000746163	0.00234391	0.00230974	0.000105312	4.83408e-05	7.68265e-05	4.02848e-05
231	C7H11NH	110.096	0.00120391	0.00140729	0.000892162	0.00129523	0.000132473	3.59066e-05	0.000827829	0.000601743	0.000846338	0.000533469	0.00152482	0.00160331	0.000567532	0.00458564	0.00527736	0.00208253	0.00664623	0.000360978	0.000669939	0.00374197	0.0012182	0.00123189	0.00398184	0.00255905	0.00248009	0.00256322	0.00112426	0.00238647	0.00213878	2.74039e-05	5.4909e-05	4.11564e-05	1.94491e-05
232	C3H4Cl2H	110.976	4.63145e-05	5.5583e-05	1.16205e-06	1.13896e-06	1.27604e-05	1.56889e-05	2.2108e-05	2.32961e-05	8.9921e-06	1.89352e-05	0	0	3.28744e-05	0	0	0	0.00149112	4.04467e-05	0.000242111	0	0.000293049	1.09581e-05	0	0.000591225	0.000146524	0.000187177	0.000277486	0.00027397	0.00053923	0	6.08427e-06	3.04214e-06	4.30223e-06
233	C6H3ClH	111	1.44577e-06	0	2.32587e-06	1.5331e-06	5.59607e-06	2.53895e-06	2.23996e-06	1.87126e-06	2.39604e-06	1.48744e-06	0	0	3.587e-05	0	0	0	0.000828374	0.00025181	2.09634e-05	0	0	1.19567e-05	0	0.000367049	0	9.47514e-05	0.000181619	0.000163723	0.00030553	0	6.71967e-07	3.35984e-07	4.75153e-07
234	C5H2O3H	111.008	0	0	1.13203e-05	2.6631e-06	2.4955e-05	3.5105e-05	1.23406e-05	1.46739e-05	1.25733e-05	1.24929e-05	8.87009e-06	0	0	0	0	0	0.000182508	0	0.000124307	0	0	2.9567e-06	0	0.000102272	0	2.63071e-05	5.06622e-05	3.69181e-05	6.90649e-05	3.32149e-05	2.16688e-05	2.74418e-05	8.16434e-06
235	C6H6SH	111.026	7.75668e-05	4.23504e-05	4.36628e-06	1.11012e-05	8.2493e-06	3.91355e-05	3.04616e-05	2.823e-05	1.71057e-05	2.12166e-05	0	0.000356109	3.72985e-05	0.00061971	0	0.000585661	0	0	0.000155438	0	0.000172797	0.000131136	0.00040179	5.18127e-05	8.63987e-05	0.000167784	0.000159348	0.00010757	0.000177449	3.45712e-05	1.52047e-05	2.48879e-05	1.36941e-05
236	C6H6O2H	111.044	0.0240719	0.0667351	0.0075861	0.00390492	0.00199225	0.00107963	0.0175617	0.0255362	0.00730838	0.016964	6.28122	1.15211	0.00463567	2.38691	1.77101	0.452302	3.47199	0.0177607	0.0121843	1.13655	0	2.47932	1.53674	1.16731	0.568274	1.43791	0.800791	2.38449	2.60063	0.0251757	0.0186004	0.0218881	0.00464944
237	C7H10OH	111.08	0.0117674	0.050293	0.00352604	0.00284538	0.00347057	0.000749281	0.0121086	0.0190855	0.00515094	0.0121498	1.94608	0.434279	0.000394478	1.34023	0.46467	0.10661	2.50433	0.00497427	0.00473018	0.722225	0.00190788	0.793583	0.63717	0.83801	0.362066	0.657707	0.215094	1.01537	1.03851	0.00376836	0.00291953	0.00334395	0.00060021
238	C8H14H	111.117	0.745174	1.46551	0.370251	0.399276	0.0818956	0.0237169	0.514304	0.532866	0.345031	0.343474	5.78691	2.47165	0.488463	6.93605	3.39394	1.80679	15.2149	0.521835	0.661035	4.56404	1.16037	2.91568	4.04559	5.46594	2.86221	3.82235	1.22408	4.95238	5.00503	0.013909	0.013721	0.013815	0.000132948
239	C5H5NO2H	112.039	0.000124612	0.000322794	8.46952e-05	3.76588e-05	1.46671e-05	6.33891e-06	9.84609e-05	0.000118662	5.36913e-05	7.92999e-05	0.017435	0.0103545	0.00210571	0.00927048	0	0	0.0149823	0.00162601	0.000954468	0.00258485	0.000445243	0.00996507	0.00309016	0.00585425	0.00151505	0.00510613	0.00370265	0.00904753	0.00783856	0.000245852	0.000118962	0.000182407	8.97251e-05
240	C6H9NOH	112.076	0.000140818	0.000234755	9.48376e-05	0.000220758	1.78804e-05	3.53672e-05	0.000124069	9.15197e-05	0.000134952	8.74867e-05	0.00120027	0.00142581	3.60746e-05	0.00306901	0.000838582	0.000287316	0.00452457	1.89461e-05	3.8323e-05	0.00100738	0	0.000887383	0.0013983	0.00152728	0.000503688	0.00107916	0.000472797	0.00141642	0.001535	6.6248e-05	3.22208e-05	4.92344e-05	2.40609e-05
241	C7H12O	112.088	0.000187282	0.000409081	0.000819767	0.0012482	0.000102701	0.000439599	0.000534439	0.000429534	0.000794874	0.000516314	0.0044941	0.00479341	0.000512243	0.00928031	0.00550381	0.00212811	0.015264	0.000734448	0.000472527	0.00513325	0.000813273	0.00326658	0.00563741	0.00549034	0.00297326	0.0043419	0.00141736	0.00521305	0.00488074	0.000180102	0.000116171	0.000148136	4.52056e-05
242	C7H13NH	112.112	0.000609182	0.000700631	0.000626768	0.00258234	0.000114201	3.85764e-05	0.000778617	0.000927403	0.00129062	0.0012414	0.000374813	0.00444776	0.000933225	0.000899589	0.0254851	0.00449865	0.00205925	0.00104947	0.000781811	0.00235856	0.00149953	0.0019186	0.0102945	0.00129684	0.00192904	0.00385974	0.00429999	0.0023059	0.00406153	4.55992e-05	8.11089e-05	6.3354e-05	2.51092e-05
243	C8H15H	112.125	0.00027002	0.000222526	0.00026766	0.000246494	7.37717e-05	3.54459e-05	0.000185986	0.000103907	0.000190871	9.24599e-05	0.000186355	0.00167061	0.001037	0	0.00211123	0.00164044	0.00352466	0.00123401	0.00154943	0.0048329	0.00252417	0.000964656	0.00125056	0.0021027	0.00367853	0.00199911	0.00121951	0.00174187	0.00139507	6.98954e-05	8.27928e-05	7.63441e-05	9.11984e-06
244	C3H6Cl2H	112.992	0.000277247	0.000425804	0.000224894	0.0003904	0.000238168	0.000321581	0.000313016	8.17679e-05	0.000322835	7.42694e-05	0	5.90466e-05	0.00106543	0	0	0	0	0.00151577	0.000459911	0.0016333	0.00185733	0.000374826	0	0.000658559	0.00174532	0.000694675	0.000750561	0.000528725	0.000729014	7.53765e-05	8.28299e-05	7.91032e-05	5.27036e-06
245	C6H5ClH	113.015	0.00230761	0.000234608	0.000268791	0.000411511	0.000319969	0.000373417	0.000652652	0.000813365	0.000413145	0.000414771	0	0.00132361	0.0034537	0.00594838	0.00162322	0.00534515	0	0.0110862	0.00081488	0.00137583	0.00268947	0.00159244	0.00430558	0.00396702	0.00203265	0.00297442	0.00136064	0.00237527	0.00353557	4.83475e-05	7.28795e-05	6.06135e-05	1.73467e-05
246	C5H4O3H	113.023	0.00293412	0.00227359	4.4758e-05	3.96186e-06	0.000100197	6.51534e-05	0.00090363	0.00133381	0.000226114	0.000949411	1.07758	0.418306	0.055832	0.427236	1.00828	0.466187	0.884256	0.133218	0.0778693	0.218309	0.0706756	0.51724	0.633902	0.365114	0.144492	0.415187	0.211372	0.542309	0.423322	0.00201551	0.00397563	0.00299557	0.00138601
247	C6H8SH	113.042	0.00100514	0.0011293	0.000332117	0.000228636	0.000586294	0.000320564	0.000600343	0.000382687	0.000381687	0.00031952	0.0100901	0.0208974	0.00403794	0.0195615	0.0532377	0.0252764	0.0117297	0.00915271	0.00558038	0.00372847	0.00561352	0.0116751	0.0326919	0.00882094	0.00467099	0.0144647	0.0124871	0.0120782	0.00871869	0.00043818	0.000591508	0.000514844	0.000108419
248	C6H8O2H	113.06	0.000509151	0.000599846	0.000607167	6.57153e-05	0.000278827	0.00016894	0.000371608	0.000232272	0.000255346	0.000246887	1.54644	0.230773	0.000705725	0.612127	0.249381	0.0968669	1.28454	0.00661106	0.000302551	0.343663	0	0.592641	0.319458	0.430483	0.171831	0.378603	0.177723	0.645976	0.703305	0.00951451	0.00580193	0.00765822	0.00262519
249	C7H12OH	113.096	0.00876152	0.0323039	0.00310738	0.00357101	0.00560966	0.000718169	0.00901193	0.0117252	0.00480536	0.00748809	0.801608	0.210734	0.00120457	0.718409	0.243992	0.0558541	1.34409	0.00450563	0.00280318	0.325336	0.000575115	0.337849	0.339418	0.450465	0.162955	0.322672	0.118815	0.48101	0.506171	0.00105938	0.000905286	0.000982335	0.000108965
250	C8H16H	113.132	0.0799459	0.143626	0.0644508	0.0516784	0.0159622	0.0132713	0.0614891	0.0481452	0.0476516	0.0321843	1.40603	0.644992	0.0849892	1.73409	0.91326	0.378971	4.49327	0.176396	0.149477	1.1309	0.195491	0.712004	1.00877	1.60638	0.663195	0.997588	0.433639	1.33711	1.49051	0.0088014	0.00812065	0.00846103	0.000481364
251	C4H3NO3H	114.019	0.000253495	0.000305376	8.98474e-05	0.000126445	7.87272e-05	0.000112964	0.000161142	9.45859e-05	0.000121863	6.38948e-05	0.0120928	0.0096876	0.0104628	0.00531702	0.0187083	0.0271426	0.0147388	0.0120333	0.00830082	0.00272608	0.00999856	0.0107477	0.017056	0.0116909	0.00636232	0.0114642	0.00439173	0.0111058	0.00353249	0.000188968	0.000191434	0.000190201	1.74319e-06
252	C5H7NO2H	114.055	0.000107109	0.00056508	0.000126826	7.2907e-05	8.65315e-05	2.16153e-05	0.000163345	0.000200027	0.00010056	0.000122896	0.00929669	0.00163837	1.61791e-05	0.00785277	0	0	0.0137053	0	0.000169987	0.00256959	0	0.00365041	0.00261759	0.00462511	0.0012848	0.00304448	0.00143111	0.00498258	0.00556888	0.00026913	0.000124621	0.000196875	0.000102183
253	C6H11NOH	114.091	0.000401798	0.000335847	0.000748778	0.000538437	0.000646737	0.00063604	0.000551273	0.000157622	0.000597209	0.000113126	0.00702521	0.00268064	0.000595678	0.00965612	0.000606133	0.00165634	0.0181609	0.00159558	0.00166861	0	0	0.00343384	0.00397286	0.0071417	0	0.0036371	0.00292488	0.00555919	0.00635149	0	0	0	0
254	C7H14O	114.104	2.1806e-05	3.9891e-05	8.90244e-05	7.49098e-05	4.98098e-05	5.88775e-05	5.57197e-05	2.41787e-05	6.80818e-05	2.05203e-05	0.000171431	0.000238791	0.000118304	0.0010556	0.000944782	0.000676729	0.00543111	0	0	0	0	0.000176175	0.00089237	0.00181037	0	0.000719729	0.000823158	0.000999261	0.0019451	3.53259e-06	1.17753e-06	2.35506e-06	1.66528e-06
255	C7H15NH	114.128	0.000196998	0.000449971	0.000189969	0.000163308	6.11782e-05	3.89123e-05	0.000183389	0.000146634	0.000147313	9.4423e-05	0.000299436	0.000213454	0.000219416	0.00140739	0.00115482	0.000806556	0.00711409	0	0.00042946	0.0027597	0.000650632	0.000244102	0.00112292	0.00251452	0.00170516	0.00139668	0.000957097	0.00155814	0.00249016	3.6537e-05	2.57649e-05	3.11509e-05	7.61697e-06
256	C2HF3O2H	115	0	0.00124335	0.000466606	0.000718899	0.000391082	0.000400513	0.000536741	0.000415994	0.000572906	0.000228687	0	0	0	0	0	0	0	0	0	0	0	0	0	0	0	0	0	0	0	0	0	0	0
257	C4H2O4H	115.003	0	0.000559847	0.000397599	0.000620458	0.000424272	0.000402972	0.000400858	0.00021668	0.000492638	0.000162913	0.000555438	0.000278373	0.00102939	0	0	0	0	0.00569487	0	0	0	0.000621068	0	0.00189829	0	0.000629839	0.000894881	0.000930886	0.00180185	0	0	0	0
258	C5H6O3H	115.039	0.000172165	2.27439e-05	4.80686e-05	2.04403e-05	0.000347853	0.000237589	0.000141477	0.000134345	0.000114508	0.000128697	0.295959	0.0533516	0.00117392	0.0327469	0.0181241	0.0190221	0.105892	0.000673496	0.00456619	0.0614099	0.00502635	0.116828	0.0232977	0.037044	0.0332181	0.052597	0.0432109	0.100554	0.122351	0.0013612	0.00106146	0.00121133	0.000211947
259	C6H10O2H	115.075	0.00207289	0.00574801	0.000544578	3.01701e-05	0.000426666	0.000251927	0.00151237	0.00219799	0.000542527	0.00153523	1.26523	0.286814	0.0012061	0.780916	0.312303	0.101446	1.85543	0.00799538	0.00712084	0.663575	0.0110803	0.517751	0.398222	0.623516	0.337328	0.469204	0.127278	0.708719	0.726441	0.00625367	0.00448558	0.00536962	0.00125023
260	C7H14OH	115.112	0.0174349	0.0526918	0.00828656	0.00794681	0.00925513	0.00153991	0.0161925	0.0185853	0.00952214	0.0118927	0.278829	0.134421	0.00176155	0.309717	0.16388	0.0385015	0.594703	0.00324026	0.00275005	0.124346	0	0.138337	0.170699	0.200231	0.0621731	0.14286	0.0594343	0.202661	0.208445	0.00056972	0.000814013	0.000691867	0.000172741
261	C8H18H	115.148	1.17411e-06	1.32706e-07	1.93285e-05	1.81127e-05	6.44204e-05	1.1707e-05	1.91459e-05	2.3625e-05	2.31925e-05	1.87525e-05	2.56528e-05	0.000117267	9.86961e-05	0.00369584	0.00148818	0.000478626	0.00229825	0	9.62902e-05	0	0.000299892	8.05385e-05	0.00188755	0.000798179	0.000149946	0.000729053	0.000837222	0.000560914	0.000993072	0	0	0	0
262	C4H5NO3H	116.034	3.59669e-05	4.85428e-05	5.45089e-05	1.92291e-06	2.01017e-05	1.47365e-05	2.92966e-05	2.04765e-05	1.98744e-05	2.24431e-05	0.0194623	0.00213239	0.000127874	0.00565454	0.0048118	0.00181236	0.0127222	0.000131852	0.000438915	0.00310797	0.000652161	0.00724085	0.0040929	0.004431	0.00188007	0.0044112	0.00219964	0.00744161	0.00834362	3.70695e-05	4.85537e-05	4.28116e-05	8.12058e-06
263	C5H9NO2H	116.071	0.000186977	0.000683396	0.000159575	0.00026005	7.20465e-05	1.8451e-05	0.000230082	0.000237901	0.000191344	0.00014633	0.00492396	0.00129002	1.4481e-05	0.00844977	0.00289485	0.00102302	0.0142066	0	7.44009e-05	0.00327624	0	0.00207615	0.00412255	0.00476035	0.00163812	0.00314929	0.00152512	0.00412086	0.00494291	0.000267973	9.80008e-05	0.000182987	0.000120188
264	C6H13NOH	116.107	6.77405e-05	5.25976e-05	0.000214086	0.000262066	3.98058e-05	6.70891e-05	0.000117231	9.53872e-05	0.000173183	0.000110829	0.00130175	0.000573438	0.000171166	0.0027826	0.000863871	0	0.00541476	0.000284064	0.000335208	0.00215331	0.000509591	0.000682119	0.00121549	0.00201134	0.00133145	0.0013101	0.000546354	0.00158696	0.00178341	9.75617e-05	3.63039e-05	6.69328e-05	4.33158e-05
265	C2H3Cl2FH	116.967	3.42631e-05	2.9787e-05	1.51758e-06	0	2.29286e-06	1.94169e-06	1.16337e-05	1.58776e-05	3.3124e-06	1.16298e-05	0	0	0.000328618	0	0.000128174	0.000178961	0.00134565	0	0.000210019	0.000170129	1.14936e-05	0.000109539	0.000102378	0.000518555	9.08112e-05	0.000205321	0.000208965	0.000262378	0.000481082	0	0	0	0
266	C4H4O4H	117.018	6.45465e-05	0.000103052	0	0	2.34079e-05	3.90416e-05	3.83413e-05	4.00944e-05	1.62222e-05	3.38987e-05	0.0248531	0.0101741	0.000433156	0.00436356	0.01122	0.00546425	0.00692745	0.00144312	0.000716918	0.00189817	0.000259517	0.0118201	0.00701593	0.00302916	0.00107885	0.00573601	0.00474941	0.00940852	0.00986901	0	1.84728e-05	9.23638e-06	1.30622e-05
267	C5H8O3H	117.055	0.000210154	0.000171855	0.000450908	0.000121957	0.000290322	0.000155793	0.000233498	0.000121095	0.000220918	0.000126233	0.0966158	0.0123727	0.000526977	0.038473	0.014401	0.0101165	0.0462504	0.00230363	0.000898943	0.0320967	0	0.0365052	0.0209969	0.0164843	0.0160484	0.0225087	0.00959541	0.0356743	0.0391687	0.00155367	0.000831859	0.00119277	0.000510398
268	C9H8H	117.07	0.305272	1.25932	0.248691	0.409921	0.0402414	0.00484241	0.378048	0.458931	0.29451	0.27908	0.731355	0.193726	0.00039879	0.718313	0.209522	0.0454993	1.33063	0.00213783	0.00215649	0.404393	0	0.308493	0.324445	0.444974	0.202196	0.320027	0.099412	0.463562	0.489774	0.000946612	0.00160815	0.00127738	0.00046778
269	C6H12O2H	117.091	0.00432642	0.0324494	0.00776176	0.0113481	0.00102596	0.00025955	0.00952853	0.0119755	0.00809407	0.00713441	0.156256	0.145701	0.00275057	0.114418	0.422593	0.0427361	0.199876	0.00709905	0.00556195	0.0783669	0	0.101569	0.193249	0.0708456	0.0391835	0.101212	0.0664345	0.112279	0.0886701	0.00121209	0.000595626	0.000903859	0.000435907
270	C7H16OH	117.127	0	0	0.000137346	6.5641e-06	0	0	2.39851e-05	5.55975e-05	2.90229e-05	5.29565e-05	0	0.000262661	3.66091e-05	0	0.00382246	0.000468934	8.80856e-06	0	1.98609e-05	0	0.000113553	9.97566e-05	0.00143047	9.55648e-06	5.67766e-05	0.000399139	0.000688537	0.000147314	0.000615018	0	0	0	0
271	C3H3NO4H	118.013	9.59806e-05	3.22403e-05	0	0	3.99034e-07	1.37524e-06	2.16659e-05	3.85676e-05	4.60436e-06	2.43589e-05	0.0047567	0.000121914	8.97654e-05	0.00168	0.00116012	0.000233833	0.00217267	0	7.15802e-05	0.000872615	0.00012219	0.00165613	0.00102465	0.000748085	0.000497403	0.000981566	0.000498603	0.0016114	0.00198267	0	4.21315e-07	2.10658e-07	2.97915e-07
272	C4H7NO3H	118.05	0.000990025	0.0012854	0.00120267	0.000875821	0.00024475	0.000109788	0.000784743	0.000494554	0.000744254	0.000406037	0.0248182	0.00452417	0.000361289	0.0160696	0.0138815	0.00210647	0.0154221	0.000119738	0.000319155	0.00661755	0.000313611	0.00990123	0.0106859	0.005287	0.00346558	0.00733492	0.00351096	0.0102294	0.010066	7.34598e-05	6.39926e-05	6.87262e-05	6.69434e-06
273	C8H7NH	118.065	0.104957	0.319804	0.101353	0.0543991	0.00643142	0.00125176	0.0980328	0.117391	0.0612051	0.0759568	0.00170113	0.0032773	0.000231709	0.00490488	0.0304386	0.00238239	0.0102432	0.00126876	0.000620728	0.0133581	0.000586183	0.00173671	0.0125753	0.00404424	0.00697216	0.0063321	0.00468113	0.00451158	0.00590986	0.000201963	0.000373038	0.000287501	0.000120968
274	C9H9H	118.078	0.0265509	0.0447519	0.0130243	0.0104102	0.00130864	0.000635414	0.0161136	0.0169111	0.0100227	0.0112561	0.0171346	0.00659478	0.000133665	0.0240342	0.0113463	0.00244365	0.0316711	0.000399057	0.000242036	0.0183826	0.000229429	0.00795434	0.0126081	0.0107707	0.00930603	0.0101598	0.00199668	0.0123095	0.0112721	0.000110307	0.00010814	0.000109223	1.53225e-06
275	C5H11NO2H	118.086	2.356e-05	2.12589e-05	0.000119156	0.000328368	0.000114443	3.19696e-05	0.000106459	0.0001176	0.000186599	0.00014953	0.00397849	0.00108429	3.66553e-05	0.00308035	0.00147458	0.00060815	0.00690288	7.5312e-05	8.67183e-05	0.00163379	5.85089e-05	0.00169981	0.00172103	0.00235497	0.000846151	0.00165549	0.00061929	0.002443	0.00254691	4.00124e-05	2.42769e-05	3.21447e-05	1.11267e-05
276	CHCl3H	118.922	6.53111e-05	5.33421e-05	1.26145e-06	0	0	7.82313e-06	2.12896e-05	2.9847e-05	5.80934e-06	2.17177e-05	2.7159e-05	0	0	0.000433224	0.000400412	0.000734049	0.0060248	0	0.000204703	0.000397661	0	9.053e-06	0.000522562	0.0020765	0.000198831	0.000701736	0.000940709	0.0010158	0.00218901	0	0	0	0
277	C3H2O5H	118.998	0	0	0	1.42273e-06	0	2.14598e-06	5.94785e-07	9.49397e-07	9.36216e-07	9.0103e-07	0	0	0	0	0	0	0.00235695	0	0	0	0	0	0	0.000785651	0	0.000196413	0.000392826	0.000370042	0.000874864	1.46472e-05	9.74256e-06	1.21949e-05	3.46813e-06
278	C4H6O4H	119.034	2.33721e-05	5.17007e-05	9.48581e-06	0	3.07299e-05	4.92146e-05	2.74172e-05	2.08105e-05	1.71909e-05	2.19776e-05	0.000608481	0.000943989	9.77977e-05	0.00203432	0.00196846	0.00139878	0.000628636	0	0.000228031	7.94618e-05	2.1751e-05	0.000550089	0.00180052	0.000285556	5.06064e-05	0.000671693	0.000779721	0.000542635	0.0004982	0	2.82996e-05	1.41498e-05	2.00108e-05
279	C8H6OH	119.049	0.127718	0.209264	0.0491367	0.0675101	0.0103956	0.00463148	0.0781092	0.0782283	0.053647	0.0509756	0.760688	0.165511	0.00895818	0.519723	0.406177	0.0907847	0.464871	0.00409374	0.00745985	0.249105	0.000958894	0.311719	0.338895	0.158808	0.125032	0.233614	0.107348	0.319755	0.304759	0.000787301	0.000773815	0.000780558	9.53605e-06
280	C7H6N2H	119.06	0.00778153	0.0102998	0.00115691	0.00478823	0.00094015	0.000266717	0.00420556	0.00414098	0.00313937	0.00283175	0.0453424	0.0082115	0.000448312	0.0145825	0.0146073	0.00407511	0.0409715	4.51028e-05	0.000160431	0.0135137	0	0.0180007	0.0110883	0.0137257	0.00675684	0.0123929	0.00471491	0.0200349	0.0207354	8.3318e-05	7.92069e-05	8.12624e-05	2.90701e-06
281	C5H10O3H	119.07	0.0151084	0.035787	0.0217132	0.0147398	0.001886	0.00132389	0.015093	0.0129322	0.0129712	0.0091616	0.00629667	0.00657169	0.000745048	0.0587603	0.0167571	0.00695558	0.0119475	0.00142188	0.00090925	0.00120285	0.000210944	0.0045378	0.027491	0.00475954	0.000706895	0.0093738	0.0122205	0.00691963	0.0100489	0.000191797	0.000124838	0.000158317	4.73468e-05
282	C9H10H	119.086	2.59773	4.74127	1.15242	1.35782	0.156724	0.053846	1.67663	1.76411	1.12101	1.14349	1.67957	0.669067	0.0123397	2.39227	0.831131	0.237669	3.9491	0.0182419	0.0279832	1.35087	0.00294638	0.786991	1.15369	1.33177	0.676908	0.987341	0.307037	1.30498	1.36786	0.00164445	0.00483164	0.00323804	0.00225369
283	C6H14O2H	119.107	0.092846	0.220415	0.0558913	0.0595047	0.00484751	0.000321418	0.0723043	0.0806522	0.0494674	0.0512297	0.00109275	0.00325505	0.000116193	0.0659642	0.00958574	0.00355434	0.00378813	0	4.37941e-05	0	0.000176272	0.001488	0.0263681	0.00127731	8.81361e-05	0.00730538	0.0127234	0.0035298	0.0114085	3.06042e-05	2.87892e-05	2.96967e-05	1.28339e-06
284	C3H5NO4H	120.029	9.04533e-06	4.45392e-06	1.34138e-08	1.84111e-06	8.91365e-07	7.91618e-06	4.02689e-06	3.77388e-06	2.61759e-06	3.11879e-06	0.00112496	6.45349e-05	4.7267e-05	0.000458505	8.94626e-05	0.000188928	0.00257748	0	4.17355e-05	0.0320494	3.14195e-05	0.000412254	0.000245632	0.000873072	0.0160404	0.00439285	0.00776959	0.00278333	0.00793424	4.66615e-05	5.02491e-05	4.84553e-05	2.53679e-06
285	C7H5NOH	120.044	0.000844963	0.00265841	0.000368658	0.00103439	5.51876e-05	8.66606e-05	0.000841378	0.000974681	0.000676924	0.000624969	0.0111328	0.00275104	2.73967e-05	0.00670991	0.00287726	0.000877013	0.00930159	9.88743e-05	0.000219362	0.00405615	0	0.00463709	0.00348806	0.00320661	0.00202807	0.00333996	0.00107134	0.00506095	0.00483834	2.38586e-05	3.1883e-05	2.78708e-05	5.67409e-06
286	C4H9NO3H	120.066	0.00230988	0.005272	0.00107905	0.00285744	0.000174211	5.34263e-05	0.00195767	0.0019747	0.00176222	0.00142871	0.00791221	0.00170835	1.13054e-05	0.00610253	0.00482402	0.00129405	0.00907065	0	3.89283e-05	0.0026824	3.10338e-05	0.00321062	0.00407353	0.00303653	0.00135672	0.00291935	0.00113615	0.00401873	0.00387112	3.92914e-05	2.86018e-05	3.39466e-05	7.55872e-06
287	C8H9NH	120.081	0.0031578	0.00731799	0.00286888	0.00209386	0.000725816	0.00030444	0.0027448	0.00251219	0.00202106	0.00163682	0.00791023	0.00349526	0.000247015	0.016727	0.00594042	0.00286578	0.0212753	0.00025211	0.000466619	0.00844191	0.000129489	0.00388417	0.00851108	0.00733133	0.0042857	0.00600307	0.00227255	0.00703339	0.00725189	6.57584e-05	9.13462e-05	7.85523e-05	1.80933e-05
288	C9H12	120.093	0.219519	0.377387	0.14204	0.10835	0.0204005	0.00714614	0.145807	0.138155	0.101002	0.0926049	0.0307183	0.0234097	0.000883263	0.0509858	0.0154786	0.00683726	0.0828145	0	0.00134366	0.0456943	0.000768824	0.0183371	0.0244339	0.0280527	0.0232315	0.0235138	0.00401356	0.0291807	0.0280287	8.53532e-05	0.000274248	0.000179801	0.000133569
289	CF2Cl2H	120.942	2.46553e-05	5.39644e-05	0	0	1.67264e-06	9.29078e-06	1.49305e-05	2.1315e-05	4.86191e-06	1.55174e-05	0	0	0.000173424	0	0	0.000312462	0.00325722	0	0.000231078	0.000844404	0.000937468	5.78081e-05	0.000104154	0.00116277	0.000890936	0.000553916	0.000557581	0.000659092	0.00116447	0	7.52271e-06	3.76135e-06	5.31936e-06
290	C3H4O5H	121.013	0	2.5289e-05	0	2.60504e-05	0	1.55709e-05	1.11517e-05	1.27628e-05	1.46151e-05	1.23712e-05	0.00275971	0	0.000135617	0	0	0	0.000124582	0	6.26919e-05	0.000833699	0.000732248	0.00096511	0	6.24246e-05	0.000782973	0.000452627	0.000492916	0.000775671	0.00116133	1.94141e-05	1.25326e-05	1.59734e-05	4.86592e-06
291	C4H8SO2H	121.032	0	0	0	0.000280747	0	0.000143626	7.07288e-05	0.00011784	0.000141508	0.000147208	0.0149988	0	0.000383522	0	0	0	0	0	0	0	0	0.00512745	0	0	0	0.00128186	0.00256372	0.00349311	0.00668323	0	1.53942e-05	7.69711e-06	1.08854e-05
292	C4H8O4H	121.05	0.0750575	0.0653304	0.0121778	0.00656264	3.18869e-08	9.7459e-06	0.026523	0.0342702	0.0103082	0.0237563	0	0.000681843	0.000434294	0.00670586	0.00239398	0.00405731	0.00118994	0	8.98552e-05	0	7.63324e-05	0.000372046	0.00438572	0.000426598	3.81662e-05	0.00130563	0.00206056	0.000625064	0.00138718	7.70018e-05	2.91094e-05	5.30556e-05	3.3865e-05
293	C8H8OH	121.065	1.06291	2.67878	0.343533	0.732949	0.0491752	0.0069723	0.812385	1.00035	0.538225	0.627313	1.80369	0.602714	0.0259078	1.4551	1.2403	0.357849	1.87813	0.0135806	0.0467717	0.688355	0.0267416	0.810769	1.01775	0.64616	0.357548	0.708057	0.278775	0.940729	0.814464	0.0032662	0.00590103	0.00458361	0.0018631
294	C9H12H	121.101	20.4257	34.6988	12.1563	10.0635	2.12834	0.698996	13.3619	12.681	9.20987	8.43541	2.6573	2.25036	0.101248	4.11122	1.54607	0.732519	7.24894	0.0646726	0.122002	3.20586	0.104052	1.66963	2.12994	2.47854	1.65495	1.98327	0.397057	2.5384	2.41525	0.00978647	0.0294949	0.0196407	0.0139359
295	C6H3O2NH	122.024	0	0	0	4.78534e-05	6.37518e-07	1.11819e-05	9.94546e-06	1.90888e-05	2.21638e-05	2.55081e-05	0.182621	0.0633368	0.0547576	0.0779777	0.396225	0.213912	0.0562154	0.0184675	0.0312592	0.0347712	0.0241744	0.100239	0.229372	0.035314	0.0294728	0.0985993	0.0928935	0.0866858	0.0774366	4.63514e-05	4.63801e-05	4.63657e-05	2.02718e-08
296	C3H7NO4H	122.045	0.000101541	0.000103224	1.54345e-05	0.000192987	3.11429e-05	1.25167e-05	7.6141e-05	7.04127e-05	9.9404e-05	8.65852e-05	0.0295056	0.00703947	0.00367774	0.0190755	0.0298171	0.0127279	0.010069	0.00168721	0.0017927	0.00645446	0.00205975	0.0134076	0.0205401	0.00451631	0.0042571	0.0106803	0.00782958	0.0120595	0.0108571	5.76155e-05	3.67459e-05	4.71807e-05	1.47571e-05
297	C7H7NOH	122.06	0.00122566	0.000596538	0.00243845	0.000239964	9.99066e-05	8.51592e-05	0.000780946	0.000918661	0.000659935	0.000896124	0.00312861	0.00156742	1.70153e-05	0.00472075	0.000290433	0.000140662	0.00955635	4.97864e-05	0	0.00115712	0	0.00157101	0.00171728	0.00320204	0.000578558	0.00176722	0.00108207	0.00271959	0.00335456	0.00011103	6.60812e-05	8.85558e-05	3.1784e-05
298	C3H6O5H	123.029	5.85141e-05	2.17259e-07	0.000164941	7.18683e-05	5.84739e-05	4.48003e-05	6.64691e-05	5.42437e-05	7.97688e-05	4.63281e-05	0	0	0.0001877	0.00306384	0	0	0	0.000491062	0	0	8.4884e-05	6.25666e-05	0.00102128	0.000163687	4.2442e-05	0.000322494	0.000468868	0.000164056	0.000541142	0	0	0	0
299	C7H6O2H	123.044	0.0159791	0.081631	0.00757634	0.01716	0.00398484	0.0110169	0.0228914	0.0292027	0.0152106	0.0171018	2.01888	0.42657	0.0101136	1.09435	0.65552	0.108233	1.22539	0.0614127	0.0153001	0.51884	0.021023	0.81852	0.619369	0.434035	0.269931	0.535464	0.236612	0.823452	0.821625	0.00273691	0.00285492	0.00279592	8.34454e-05
300	C4H10O4H	123.065	0.00197506	0.00355374	0.00240414	0.00186022	0.000667163	0.000685621	0.00185766	0.00109363	0.00167796	0.0007862	0.138207	0.0275907	0.000336086	0.0673153	0.034433	0.00565044	0.063231	0.0048182	0.00226519	0.0265193	9.48391e-05	0.055378	0.0357996	0.0234381	0.0133071	0.0319807	0.018108	0.0518166	0.055532	0.000519491	0.000410615	0.000465053	7.69869e-05
301	C8H10OH	123.08	0.065248	0.226487	0.0170569	0.00942642	0.00269466	0.00106415	0.0536628	0.0879359	0.0199942	0.0571357	0.798757	0.15122	7.26494e-05	0.500847	0.118953	0.041587	0.84431	0.00293099	2.87276e-05	0.228517	0	0.316683	0.220462	0.282423	0.114258	0.233457	0.0888847	0.375757	0.391284	0.00131244	0.00105914	0.00118579	0.000179107
302	C7H10N2H	123.092	0.00110251	0.0041263	0.000496106	0.000286378	0.000152159	4.87315e-05	0.00103536	0.00155972	0.000466263	0.000997463	0.0290129	0.00308843	0.00017219	0.0216052	0.00618037	0.0046274	0.00366455	0.000422791	3.6341e-05	0.00110945	0.000250397	0.0107578	0.0108043	0.00137456	0.000679924	0.00590416	0.00563855	0.00875486	0.0119963	0.000178419	0.00010192	0.00014017	5.40924e-05
303	C9H14H	123.117	0.00367807	0.00749806	0.00280304	0.00755545	0.00187426	0.000680736	0.00401493	0.00289651	0.00458895	0.00292966	2.36588	0.858874	0.15569	2.47653	1.13147	0.630841	5.8328	0.138411	0.18272	1.59688	0.376744	1.12682	1.41295	2.05131	0.986811	1.39447	0.472442	1.87978	1.96222	0.00268904	0.00340528	0.00304716	0.000506461
304	C6H5NO2H	124.039	0.000919993	0.00118941	0.000395391	0.000482166	0.000128485	0.000113878	0.000538221	0.000433889	0.000399009	0.000287133	0.0122829	0.00669912	0.00208469	0.0106072	0	0	0.0164473	0.00153654	0.00127937	0.00387058	0.00100669	0.00702224	0.00353573	0.00642106	0.00243864	0.00485442	0.00221576	0.00761206	0.00630204	5.09632e-05	3.31693e-05	4.20662e-05	1.25822e-05
305	C7H9NOH	124.076	0.000514756	0.00100895	0.000663769	0.000913456	0.000100746	6.56876e-05	0.000544561	0.000398279	0.000601558	0.000368976	0.00465786	0.00173448	8.24743e-06	0.00438145	0.00133235	0.000300998	0.0100397	0	4.50945e-05	0.00173222	0	0.00213353	0.00200493	0.0033616	0.000866108	0.00209154	0.00102046	0.0032259	0.00360777	5.17456e-05	2.49725e-05	3.83591e-05	1.89314e-05
306	C8H13NH	124.112	0.00158243	0.00256929	0.000836282	0.00150759	0.000173687	9.45252e-05	0.0011273	0.000947819	0.00100499	0.000694779	0.00361446	0.00316617	0.000695104	0.00592501	0.00684422	0.00268676	0.0121769	0.000714348	0.000784681	0.00539757	0.0016021	0.00249191	0.005152	0.00455866	0.00349984	0.0039256	0.00117495	0.00428012	0.00375994	1.08947e-05	1.90664e-05	1.49805e-05	5.77828e-06
307	C6H4O3H	125.023	0.000130132	0.000112745	0	0	3.37926e-07	0	4.05359e-05	6.29079e-05	9.02971e-06	4.46225e-05	0.887332	0.0463775	0	0.053135	0.0406192	0.0651625	0.145085	0	0.00083476	0.0136292	0	0.311237	0.0529722	0.0486398	0.00681458	0.104916	0.139113	0.239764	0.382654	0.00113443	0.00151594	0.00132518	0.000269766
308	C7H8SH	125.042	2.05159e-05	3.50334e-05	1.32615e-05	1.55016e-05	1.69773e-05	3.43171e-06	1.74536e-05	1.036e-05	1.44663e-05	7.04104e-06	0.0285371	0.0018269	0.000299422	0.00342639	0.0103665	0.00390573	0.00369644	0.000399616	9.69379e-05	0.00143541	0.000143739	0.0102211	0.00589954	0.00139766	0.000789574	0.00457698	0.00439917	0.00802919	0.0118865	0.000102566	0.000102533	0.00010255	2.33189e-08
309	C7H8O2H	125.06	0.00878682	0.0261705	0.00367393	0.00335294	0.000851601	0.000167527	0.00716723	0.00979167	0.00372546	0.00621094	1.34708	0.216757	0.000784748	0.45071	0.229931	0.0917394	0.846957	0.00374921	0.00314175	0.218797	0	0.521542	0.25746	0.284616	0.109398	0.293254	0.170562	0.515468	0.5777	0.00684392	0.00468524	0.00576458	0.00152641
310	C8H12OH	125.096	0.0036872	0.0175812	0.000954318	0.0012432	0.00150539	7.72711e-05	0.00417477	0.0066761	0.00185693	0.00417413	1.30399	0.282173	0	0.941587	0.27495	0.0746923	1.90676	0	0.0011422	0.514708	0	0.52872	0.43041	0.635967	0.257354	0.463113	0.16082	0.716561	0.756351	0.00292226	0.00204671	0.00248449	0.000619101
311	C7H12N2H	125.107	0.000106793	0.000441751	0.000253818	0.000109743	9.94214e-05	5.25357e-05	0.000177344	0.000146257	0.00014168	9.84852e-05	0.0146619	0.00308975	0.00152011	0.0268905	0.00818862	0.00494967	0.00357193	0.00187257	0	0.000641712	0	0.00642394	0.0133429	0.00181483	0.000320856	0.00547564	0.00585282	0.00584307	0.00647174	2.78296e-06	1.84541e-05	1.06185e-05	1.10812e-05
312	C9H16H	125.132	0.251638	0.494804	0.139649	0.160035	0.0355265	0.00972266	0.181896	0.176695	0.131494	0.113956	3.44889	1.49159	0.259132	4.02888	1.92553	0.9801	9.01685	0.333189	0.346745	2.52989	0.568593	1.7332	2.3115	3.23226	1.54924	2.20655	0.757014	2.91776	2.98358	0.0135517	0.014282	0.0139169	0.000516345
313	C6H7NO2H	126.055	0.000164887	0.000372093	8.02152e-05	9.63173e-05	1.17648e-05	1.21609e-05	0.000122906	0.00013491	8.16433e-05	8.54343e-05	0.0137084	0.0054417	0.000218891	0.0109895	0.00668361	0.00191384	0.0181069	0.000185755	0.000167355	0.00324781	3.90309e-05	0.00645634	0.00652897	0.00615334	0.00164342	0.00519552	0.00237365	0.00769421	0.007225	0.000158458	9.32956e-05	0.000125877	4.6077e-05
314	C7H11NOH	126.091	0.000121425	0.000262839	9.32529e-05	8.93651e-05	1.12899e-05	9.20606e-06	9.78963e-05	9.29738e-05	7.44286e-05	6.04159e-05	0.00329432	0.00153637	2.5532e-05	0.00387806	0.000950348	0.000209209	0.00680085	0	0.000104259	0.0016379	0	0.00161874	0.0016792	0.0023017	0.000818952	0.00160465	0.000607992	0.00234253	0.00241968	7.938e-05	3.55913e-05	5.74857e-05	3.09632e-05
315	C8H14O	126.104	0.000264864	0.000420591	0.000159025	0.000140869	2.97652e-05	1.13409e-05	0.000171076	0.00015336	0.000123466	0.00010251	0.00261314	0.00247387	9.75984e-05	0.00479246	0.00341361	0.00116435	0.0107231	0.00024923	0.000203411	0.00195896	0	0.0017282	0.00312347	0.00372523	0.000979478	0.0023891	0.00125809	0.00311423	0.00356363	3.48522e-05	1.2258e-05	2.35551e-05	1.59766e-05
316	C8H15NH	126.128	0.000744074	0.00103604	0.000665471	0.0017618	0.000123914	4.05661e-05	0.000728644	0.000633291	0.000970228	0.000767023	0.000829264	0.00423575	0.000760505	0.00156535	0.0210045	0.00296362	0.00568394	0.000766501	0.000939699	0.00452544	0.00229589	0.00194184	0.00851115	0.00246338	0.00341067	0.00408176	0.00301487	0.00300714	0.00349193	7.42878e-05	8.20371e-05	7.81625e-05	5.47964e-06
317	C2H6S3H	126.97	0.000349823	0.000516318	0.000257034	2.95073e-05	0.000235693	0.00036798	0.000292726	0.000162928	0.000188631	0.000182795	0.000235337	0.000196258	0.000506904	0.00014446	0.000322476	0.000921968	0	0.000377439	0.000691233	0	0	0.000312833	0.000462968	0.000356224	0	0.000283006	0.000198938	0.000225133	0.000206345	0	9.22495e-05	4.61247e-05	6.52302e-05
318	C5H2O4H	127.003	0.000469971	0.000578033	0.000313791	0.000186313	0.000389456	0.000492498	0.00040501	0.000140144	0.00031549	0.000156876	0	0.000279585	0.000756196	0	0.000545876	0.000966765	0.000836675	0	0.00100706	0	0.000448324	0.00034526	0.000504214	0.000614578	0.000224162	0.000422053	0.000172118	0.000338689	0.000371326	0.000443439	0.000374799	0.000409119	4.85365e-05
319	C7H7ClH	127.031	0.00165619	2.43056e-05	0	6.20815e-06	2.43971e-05	3.94348e-05	0.000291755	0.000668581	6.32798e-05	0.000361746	0	0.00155659	0.00204713	0.00630782	0.00401768	0.00500007	0.00280208	0.00151969	0	0.000391659	0	0.00120124	0.00510852	0.00144059	0.00019583	0.00198654	0.00215005	0.00138013	0.00155204	6.68933e-05	6.42697e-05	6.55815e-05	1.8551e-06
320	C6H6O3H	127.039	0.00013876	8.8371e-05	0.000131438	4.69407e-05	9.64805e-05	5.57745e-05	9.29607e-05	3.77152e-05	7.67173e-05	3.82399e-05	0.431224	0.150307	0.0342151	0.157347	0.275746	0.0813434	0.300981	0.0203551	0.0166243	0.0744965	0.00990465	0.205249	0.171479	0.112653	0.0422006	0.132895	0.0715518	0.195696	0.1724	0.00103389	0.000689052	0.000861472	0.000243838
321	C10H7	127.054	0.000368481	0.000520278	0.000204692	0.000334489	2.24462e-05	4.85786e-07	0.000241812	0.000204897	0.000219264	0.000155939	0.00902022	0.00776558	0.00217188	0.0101029	0.0127332	0.00447117	0.00956125	0.000858737	0.00116343	0.00292287	0.00037642	0.00631922	0.00910242	0.00386114	0.00164965	0.00523311	0.00320805	0.00608443	0.00388329	4.60368e-05	1.70676e-05	3.15522e-05	2.04843e-05
322	C7H10SH	127.058	0.000241059	0.000569943	0.00020676	0.000275526	4.73957e-05	1.92955e-05	0.000226663	0.000197975	0.000199773	0.000134195	0	0.00158203	0.000574332	0.00340986	0.00287329	0.002132	0.00106491	0.000219927	0.000183728	1.17535e-05	0	0.000718786	0.00280505	0.00048952	5.87674e-06	0.00100481	0.0012364	0.000700544	0.000893201	1.56982e-05	1.58525e-05	1.57754e-05	1.09101e-07
323	C7H10O2H	127.075	0.000645332	0.000599961	0.000505668	8.13734e-05	0.000218585	0.000132502	0.000363904	0.000248801	0.000231767	0.000232772	1.07092	0.159444	0.000480024	0.432696	0.145168	0.0695972	1.05076	0.00597803	0.00166414	0.24323	0	0.41028	0.21582	0.352802	0.121615	0.275129	0.130873	0.47283	0.517528	0.00785386	0.00496176	0.00640781	0.00204502
324	C8H14OH	127.112	0.0048392	0.0175818	0.00223905	0.00231978	0.00558828	0.000965837	0.00558899	0.00612655	0.00336253	0.00405919	0.574766	0.155729	0.00116982	0.531294	0.164772	0.0415661	1.03461	0.00592619	0.00339554	0.24038	0.0011115	0.243888	0.245877	0.347976	0.120746	0.239622	0.0929688	0.357996	0.383066	0.000967135	0.000730217	0.000848676	0.000167527
325	C9H18H	127.148	0.039606	0.0702754	0.0294681	0.0315463	0.00807123	0.007463	0.0310717	0.0232334	0.0257862	0.0154849	1.28756	0.571763	0.059458	1.53678	0.799046	0.306797	4.1368	0.130529	0.112639	0.9317	0.13522	0.639595	0.880873	1.45999	0.53346	0.87848	0.414031	1.20592	1.3862	0.00542028	0.00572335	0.00557181	0.000214302
326	C6ClH4OH	128.002	1.81416e-05	1.96687e-05	2.2463e-06	0	3.5536e-06	2.44341e-06	7.6756e-06	8.78784e-06	2.78492e-06	6.87621e-06	0.000182146	3.21522e-05	0.000126206	0.000677273	0.000315866	0.000312542	0.00118204	0.000103554	0.000115369	0.000313545	0.000204519	0.000113502	0.000435227	0.000466987	0.000259032	0.000318687	0.000164554	0.000324135	0.000387981	9.61158e-08	3.20386e-08	6.40772e-08	4.53094e-08
327	C5H5NO3H	128.034	0.000128652	0.000147907	0.000164633	0.000136441	6.47822e-05	1.65555e-05	0.000109828	5.70002e-05	0.000112514	5.10704e-05	0.0223591	0.00745698	0.000559347	0.00710767	0.013793	0.00666804	0.0111884	0.000901828	0.000369019	0.0024961	0.000167874	0.0101251	0.00918958	0.00415309	0.00133199	0.00619995	0.0041726	0.00913013	0.00875377	9.66574e-05	6.60781e-05	8.13678e-05	2.16228e-05
328	C10H8	128.062	0.0258115	0.0381097	0.0144858	0.0140298	0.00256997	0.000312907	0.0158866	0.0142664	0.0116641	0.00958589	0.0507964	0.0198612	8.8806e-05	0.0496022	0.0218582	0.00438584	0.0952144	0.000709555	0.000423383	0.0199545	8.58539e-05	0.0235821	0.0252821	0.0321158	0.0100202	0.02275	0.00925328	0.0334828	0.0344677	0.000240215	0.000154103	0.000197159	6.08904e-05
329	C6H9NO2H	128.071	0.00071267	0.000909925	0.000514266	0.000577178	0.000187706	6.28645e-05	0.000494102	0.000318695	0.000444565	0.000235501	0.00852312	0.00390144	7.26667e-05	0.00922755	0	0	0.0188773	0.000235172	0.000167341	0.00613457	0	0.00416574	0.00307585	0.00642662	0.00306728	0.00418387	0.00158164	0.00631419	0.00670074	0.000185097	9.07354e-05	0.000137916	6.6724e-05
330	C7H13NOH	128.107	1.63977e-05	7.01696e-07	2.12759e-05	3.62205e-05	3.21641e-05	2.19508e-05	2.14518e-05	1.25639e-05	2.83417e-05	1.14287e-05	0.00207933	0.0010812	3.43662e-05	0.00375076	0.000542568	0.000391791	0.00548976	5.25151e-05	0.000225849	0.00132212	0	0.00106497	0.00156171	0.00192271	0.000661058	0.00130261	0.00055369	0.00175793	0.00188951	3.84223e-05	1.39495e-05	2.61859e-05	1.73049e-05
331	C8H16O	128.12	4.53783e-06	2.56174e-06	5.13355e-06	2.15348e-05	2.26564e-05	2.89604e-05	1.42308e-05	1.14384e-05	1.8359e-05	9.58723e-06	0.000995894	0.00065415	4.49657e-05	0.00178616	0.000935316	0.000406292	0.00444577	0.000137155	5.95156e-05	0.00131998	0	0.000565003	0.00104259	0.00154748	0.000659988	0.000953765	0.000446403	0.00122518	0.00148511	2.60144e-05	9.69688e-06	1.78556e-05	1.15382e-05
332	C8H17NH	128.143	5.02195e-05	0.000108536	0.000373864	0.000451767	6.03621e-05	0.000140036	0.000197464	0.000171739	0.000300761	0.000194546	0.00133095	0.000864845	0.000354649	0.00242256	0.00165248	0.000999697	0.00642476	0.000505259	0.000698355	0.00311794	0.00122798	0.000850149	0.00169158	0.00254279	0.00217296	0.00181437	0.000731206	0.00199058	0.00203082	0.000127693	7.14419e-05	9.95674e-05	3.97755e-05
333	C6ClH5OH	129.01	0	0	0	8.53092e-06	0	8.03292e-05	1.481e-05	3.22786e-05	1.60365e-05	2.77888e-05	0	0	0.00160628	0	0	0	0	0.000543736	0.000706298	0	0.00127552	0.000535428	0	0.000416678	0.000637758	0.000397466	0.000279954	0.000308171	0.000527206	0	3.33744e-05	1.66872e-05	2.35993e-05
334	C5H4O4H	129.018	2.48904e-06	3.21367e-06	0	0	0	1.7848e-05	3.92512e-06	6.96612e-06	2.9768e-06	6.47338e-06	0.00237682	0.00048939	0.000819188	0	0	0.000224551	0	0.00144572	0.000778977	0	0.000409391	0.00122847	7.48505e-05	0.000741566	0.000204696	0.000562395	0.000529592	0.000936978	0.000974779	0	1.67481e-05	8.37405e-06	1.18427e-05
335	C4H5F4	129.032	0.000615002	0.000735581	0.000782247	7.58402e-05	7.63575e-06	0.00041644	0.000438791	0.000333234	0.000298712	0.000334979	0.0058412	0.000852628	0.00299423	6.16723e-05	0.000753177	0.00125961	0.00788154	0.00206291	0.000860236	0.00376936	0.000199588	0.00322935	0.000691487	0.00360156	0.00198447	0.00237672	0.00131923	0.00353461	0.00296121	0.000221763	0.000143725	0.000182744	5.51813e-05
336	C6H8O3H	129.055	0.000192478	0	0.00254963	7.36009e-05	0.000258739	0.000312383	0.000564472	0.000979371	0.000612273	0.000947554	0.183467	0.0211782	0.000929652	0.043496	0.0183833	0.0175674	0.0320908	0.00571114	0.000339182	0.0165391	0	0.068525	0.0264823	0.0127137	0.00826953	0.0289976	0.0274685	0.0547462	0.075937	0.0016228	0.000774183	0.00119849	0.000600066
337	C10H8H	129.07	1.24769	1.77579	0.671331	0.623447	0.125881	0.0159245	0.743344	0.67086	0.532439	0.450949	1.18814	0.528556	0.00909348	1.11175	0.713027	0.174034	2.55746	0.0116496	0.0199616	0.623259	0.00972318	0.575265	0.66627	0.863023	0.316491	0.605262	0.2269	0.861111	0.892844	0.0117454	0.00760211	0.00967374	0.00292972
338	C7H12O2H	129.091	0.0931763	0.139565	0.0568853	0.0397686	0.0082193	0.000647902	0.056377	0.0528685	0.0382124	0.0361588	0.912821	0.226381	0.00153011	0.67097	0.236458	0.0729777	1.52334	0.00675085	0.00307041	0.591562	0	0.380244	0.326802	0.511055	0.295781	0.378471	0.0950245	0.553811	0.57136	0.00417172	0.00262787	0.0033998	0.00109166
339	C8H16OH	129.127	0.00374553	0.0314819	0.00173604	0.00252781	0.00657401	0.00150424	0.00792826	0.0116866	0.00418305	0.00720192	0.263155	0.120751	0.00145249	0.310677	0.134611	0.0311575	0.591708	0.00261013	0.002307	0.116754	0.00125767	0.128453	0.158815	0.198875	0.059006	0.136287	0.0590438	0.19497	0.207232	0.000592015	0.00096915	0.000780582	0.000266675
340	C9H20H	129.164	3.58817e-06	3.46044e-06	4.87701e-05	3.00455e-05	0.000133834	2.54699e-05	4.08614e-05	4.86795e-05	4.69602e-05	3.92221e-05	0.000372206	0.000317844	1.65198e-05	0.00608286	0.00265778	0.00052892	0.00559943	0	0.000145782	0	6.55338e-05	0.000235523	0.00308985	0.00191507	3.27669e-05	0.0013183	0.00145138	0.00126736	0.00213633	1.57552e-05	9.24694e-06	1.25011e-05	4.60206e-06
341	C4H3NO4H	130.013	0	0	0	0	0	9.50987e-06	1.58498e-06	3.88239e-06	1.46928e-06	3.43908e-06	0.00232779	0.000100923	3.78828e-05	0.000806538	0	0	0.00253564	0	0.000108882	0.00053717	0	0.000822198	0.000268846	0.000881506	0.000268585	0.000560284	0.000337544	0.00101922	0.00121342	1.89421e-06	5.23387e-06	3.56404e-06	2.3615e-06
342	C5H7NO3H	130.05	0.00247215	0.00516664	0.00187821	0.00110548	0.000182606	0.000101934	0.00181784	0.00188531	0.00117919	0.00126566	0.0209505	0.00249642	0.000153571	0.0133429	0.00234392	0	0.0139883	0	0.000332851	0.00445174	0	0.00786684	0.00522895	0.00477371	0.00222587	0.00502384	0.00231055	0.00821514	0.00907192	0.000239881	0.000121978	0.00018093	8.33698e-05
343	C6H11NO2H	130.086	1.58234e-05	9.32711e-06	2.47963e-05	4.08331e-05	3.3534e-05	2.52789e-05	2.49321e-05	1.1432e-05	3.20712e-05	1.15047e-05	0.00655987	0.000771977	3.23805e-05	0.00845539	0.00143518	0.0006632	0.0142897	0	0.000148532	0.00440032	0.000137154	0.00245474	0.00351792	0.00481275	0.00226874	0.00326354	0.00117026	0.00447365	0.00518328	0.000146786	7.35171e-05	0.000110152	5.18088e-05
344	C7H15NOH	130.123	0	0	1.69e-06	1.93623e-06	4.15569e-06	6.64805e-06	2.40499e-06	2.58331e-06	2.81487e-06	1.96975e-06	0.000781107	0.000388978	1.52814e-05	0.00258356	0.00293294	0.000477692	0.004413	0	9.73885e-05	0.00129364	0	0.000395122	0.00199806	0.00150346	0.000646819	0.00113587	0.000745291	0.0011726	0.0015293	2.71758e-05	1.42339e-05	2.07049e-05	9.15124e-06
345	C2HCl3H	130.922	0.000131861	8.67126e-05	0.000161842	0.000273994	0.000124574	0.000132483	0.000151911	6.44678e-05	0.000194933	8.20382e-05	0	0	0.000103695	0	6.74823e-05	9.77897e-07	0.00579447	0	0.000751094	0.00178678	0	3.45651e-05	2.28201e-05	0.00218186	0.000893388	0.000783157	0.00101768	0.00107259	0.00210745	1.88798e-05	2.75844e-05	2.32321e-05	6.15508e-06
346	C4H2O5H	130.997	0.000189273	8.19588e-05	0.000298525	0.000382695	0.000552256	0.000676213	0.000363487	0.000222544	0.000418828	0.000161416	0.00514875	0.00334393	0.00408059	0.00303465	0.00300007	0.00712199	0.0405637	0.00925407	0.00718882	0.0120637	0.0116021	0.00419109	0.00438557	0.0190022	0.0118329	0.00985293	0.00706111	0.011717	0.0128995	0.000671218	0.000589679	0.000630449	5.76567e-05
347	C5H6O4H	131.034	6.69983e-05	0.000371722	2.62294e-05	1.32694e-05	4.31178e-05	8.26519e-05	0.000100665	0.000135219	4.88182e-05	9.05893e-05	0.000964615	0.00319707	0.00155517	0.0102613	0.0180366	0.0105457	0.000201945	0.00363999	0.000269452	0	0	0.00190562	0.0129479	0.00137046	0	0.00405599	0.005982	0.00215477	0.00372118	0.000104999	0.000106646	0.000105823	1.16466e-06
348	C9H6OH	131.049	0.113405	0.102744	0.0175623	0.011477	0.000355259	8.59399e-05	0.0409383	0.0525389	0.0163259	0.036263	0.925977	0.185339	6.00156e-05	0.635866	0.392999	0.0637811	0.620527	0	0.000716432	0.312511	0	0.370459	0.364215	0.207081	0.156255	0.274503	0.109215	0.391135	0.382429	0.000260758	0.000255478	0.000258118	3.73352e-06
349	C6H10O3H	131.07	0.00210151	0.00266577	0.0018488	0.00103463	0.000305998	0.000140922	0.0013496	0.00101942	0.00104489	0.000760693	0.0703845	0.0115904	0.000684155	0.0535116	0.0242973	0.00994502	0.0363512	0.00153088	0.000218503	0.0179594	0	0.027553	0.0292513	0.0127002	0.00897971	0.0196211	0.0102761	0.0275277	0.0282031	0.00149007	0.000713438	0.00110175	0.000549159
350	C10H10H	131.086	0.308868	1.014	0.186166	0.213797	0.0215085	0.00184106	0.29103	0.373158	0.184925	0.228713	1.0955	0.288135	0.000455145	0.990034	0.229995	0.0618426	1.7964	0.0041032	0.00489847	0.578684	0.000855369	0.461362	0.42729	0.601799	0.28977	0.445055	0.128145	0.657296	0.679574	0.00109093	0.00197311	0.00153202	0.000623797
351	C7H14O2H	131.107	0.00281919	0.0195562	0.00372987	0.00342255	0.000363706	0.000165741	0.00500955	0.00728843	0.00321339	0.00424371	0.127496	0.108105	0.00242901	0.0993954	0.26565	0.00590517	0.170379	0	0	0.183372	0	0.0793432	0.12365	0.0567931	0.0916858	0.0878681	0.0278883	0.0958989	0.0723957	0.000101535	0.000156491	0.000129013	3.886e-05
352	C8H18OH	131.143	0	0	0	0	0	0	0	0	0	0	0	0.000186945	1.20912e-05	0	0.00265992	0	0.00367201	0	0	0	8.70714e-06	6.63454e-05	0.000886641	0.001224	4.35357e-06	0.000545336	0.000605302	0.000669243	0.00135874	0	1.41973e-06	7.09864e-07	1.0039e-06
353	C4H5NO4H	132.029	0.000175052	0.00015164	0	3.46875e-06	5.79495e-06	4.21882e-06	5.66958e-05	8.29637e-05	1.50967e-05	5.8904e-05	0.00146024	0.000126789	5.7945e-05	0.000537127	0.000776916	0.00047242	0.00281078	0.000144782	0.000117897	7.98805e-05	6.87392e-06	0.000548326	0.000595488	0.00102449	4.33772e-05	0.00055292	0.000401598	0.000870267	0.00105182	1.74192e-05	2.42892e-05	2.08542e-05	4.85788e-06
354	C8H5ONH	132.044	0.000653569	0.00134392	0.000400034	0.000130966	2.15138e-05	3.76507e-05	0.000431275	0.000509184	0.000221291	0.000356874	0.00871287	0.00198037	0	0.00658448	0.00350841	0.000771491	0.007177	0	0.000126549	0.00238137	2.65416e-05	0.00356441	0.00362146	0.00243452	0.00120395	0.00270609	0.00114087	0.0039175	0.00378018	4.36091e-05	2.22644e-05	3.29367e-05	1.5093e-05
355	C5H9NO3H	132.066	0.000273335	0.00086021	0.000521734	0.000494294	0.000114552	8.53757e-05	0.000391583	0.0002938	0.000387524	0.000210629	0.0108841	0.00043756	0	0.00520393	0.00330051	0.00074862	0.0103747	0	0.000181162	0.00315801	0.000470043	0.00377387	0.00308435	0.00351861	0.00181403	0.00304772	0.000870321	0.0046919	0.00516281	8.4473e-05	5.04045e-05	6.74387e-05	2.409e-05
356	C9H9NH	132.081	0.046859	0.0948439	0.0318428	0.0222993	0.00274197	0.000338773	0.0331543	0.0349707	0.0217089	0.0231639	0.00903502	0.00499475	9.32167e-05	0.0160908	0.0232	0.0018554	0.0200747	5.21158e-05	0.000286747	0.00915912	2.76371e-06	0.00470766	0.0137154	0.00680453	0.00458094	0.00745213	0.00429821	0.00771352	0.00718628	6.83245e-05	0.000101743	8.50339e-05	2.36306e-05
357	C6H13NO2H	132.102	0.0061857	0.00730101	0.00271865	0.00283805	0.000490216	9.24277e-05	0.00327101	0.00293479	0.00232957	0.0019696	0.013497	0.00402878	8.51725e-06	0.0195274	0.00816331	0.00197792	0.0285439	0	0.000244063	0.0131336	0	0.00584477	0.00988956	0.009596	0.00656679	0.00797428	0.00206673	0.00991492	0.0100842	5.27152e-05	4.40784e-05	4.83968e-05	6.10714e-06
358	C2H3Cl3H	132.937	0	0	2.51536e-05	2.62695e-05	4.24776e-05	5.74408e-05	2.52236e-05	2.28438e-05	3.14062e-05	1.59543e-05	0	4.93675e-05	0.000643336	0	0.00014409	0.000491022	0	0	0.000393742	0.00108161	0	0.000230901	0.000211704	0.000131247	0.000540804	0.000278664	0.000180013	0.000153827	0.00033075	0	1.41207e-06	7.06037e-07	9.98487e-07
359	C4H4O5H	133.013	0	0	5.53692e-06	2.82537e-05	3.03008e-05	8.71777e-05	2.52115e-05	3.32665e-05	3.12158e-05	2.68848e-05	0	0	0	0	0	0	0	0.00182075	0	0	0	0	0	0.000606916	0	0.000151729	0.000303458	0.000216669	0.000593104	0	0	0	0
360	C3H4N2O4H	133.024	3.06122e-07	4.47612e-06	0	0	0	1.01819e-05	2.49403e-06	4.15885e-06	1.78372e-06	3.77421e-06	0	0	0.000236619	0	0	0.000577172	0	0.000356694	0.000184425	0	0.00129659	7.88729e-05	0.000192391	0.000180373	0.000648293	0.000274982	0.000254029	0.000165133	0.000355611	0	3.44609e-05	1.72304e-05	2.43675e-05
361	C8H4O2H	133.028	0	0	0	0	0	1.66818e-05	2.7803e-06	6.81031e-06	2.57733e-06	6.03267e-06	0.0119653	0	0.000392404	0	0	0.000543349	0	2.14554e-05	8.15983e-05	0	0	0.00411923	0.000181116	3.43512e-05	0	0.00108367	0.00202523	0.00280454	0.00530869	4.31083e-05	2.78425e-05	3.54754e-05	1.07946e-05
362	C5H8O4H	133.05	0.00449885	0.00106384	5.78484e-05	8.51727e-05	4.34951e-05	8.18166e-05	0.000971838	0.00177335	0.000249447	0.00105962	0.000189069	0.000490745	7.69153e-05	0.0043546	0.00206666	0.00177028	0	0.000240552	0.00010266	0.00130066	0	0.000252243	0.00273051	0.000114404	0.000650331	0.000936873	0.00121716	0.000436876	0.000938334	0.000117134	5.21989e-05	8.46662e-05	4.59158e-05
363	C9H8OH	133.065	0.152195	0.384961	0.0467435	0.0527167	0.0054536	0.00291841	0.107498	0.146305	0.0545152	0.0938259	1.23419	0.259943	0.000812205	0.811192	0.369398	0.0750124	0.957273	0.00727522	0.0041327	0.400715	0.00181525	0.498316	0.418534	0.322894	0.201265	0.360252	0.127972	0.539701	0.529535	0.00209866	0.00159803	0.00184834	0.000353998
364	C8H8N2H	133.076	0.00300038	0.0125993	0.00438289	0.00294022	0.000999145	0.000333196	0.00404253	0.00444201	0.00294955	0.00272448	0.0442838	0.00916424	0.000442611	0.0554513	0.0265393	0.00568501	0.00574887	0.00227046	0.00084964	0.00132863	0.000445586	0.0179636	0.0292252	0.00295633	0.00088711	0.012758	0.0133574	0.0153865	0.0185938	0.000200762	0.000136581	0.000168672	4.53825e-05
365	C6H12O3H	133.086	0.00020098	0.000206208	8.12234e-05	0.000248294	0.000135774	7.5235e-05	0.000157952	7.15026e-05	0.000168948	7.67245e-05	0	0.00127774	0.000502393	0.0346638	0.00542233	0.00549836	0	0.00171856	0	0	0.000722223	0.000593378	0.0151948	0.000572853	0.000361112	0.00418055	0.00734361	0.00165521	0.00623644	7.32421e-05	3.73795e-05	5.53108e-05	2.53586e-05
366	C10H12H	133.101	2.63104	4.28976	1.15449	1.0436	0.132476	0.0193407	1.54512	1.63951	0.959463	1.08554	2.87947	1.22336	0.022478	3.77837	1.51433	0.382927	6.3608	0.0214453	0.0456924	2.88194	0.000787299	1.3751	1.89188	2.14265	1.44136	1.71275	0.367221	2.21433	2.20664	0.00215727	0.00547525	0.00381626	0.00234617
367	C7H16O2H	133.122	0.155648	0.269054	0.0739574	0.0536803	0.0051414	0.000275519	0.0929595	0.103097	0.0545538	0.0689688	0.0722285	0.0409691	0.00132279	0.184231	0.0490565	0.0150541	0.151532	0.00103415	0.00063019	0.0436594	1.23929e-05	0.0381735	0.0827804	0.0510653	0.0218359	0.0484638	0.0258156	0.0571092	0.0551964	6.0975e-05	8.40284e-05	7.25017e-05	1.63012e-05
368	C3H3NO5H	134.008	1.98792e-05	2.72387e-05	0	0	2.39733e-06	4.61966e-06	9.02248e-06	1.16257e-05	2.90624e-06	8.85383e-06	0	0.000116872	0	0	0	0	0	0	0.000168362	0.000437652	0.000284505	3.89572e-05	0	5.61205e-05	0.000361078	0.000114039	0.000166358	7.72333e-05	0.00013158	0	1.05529e-05	5.27645e-06	7.46203e-06
369	C7H3NO2H	134.024	6.3784e-06	4.86254e-06	0	0	0	1.73834e-06	2.16321e-06	2.80261e-06	6.7874e-07	2.11999e-06	0.00169699	8.60272e-05	1.66665e-05	0.000177313	0.000207628	2.00249e-05	0.000185528	0	0.000312399	0.0011701	0.000346275	0.000599894	0.000134989	0.000165976	0.00075819	0.000414762	0.000312188	0.000563049	0.00069355	0	1.06891e-05	5.34457e-06	7.55836e-06
370	C4H7NO4H	134.045	1.0672e-05	1.21821e-05	1.18444e-05	4.53585e-06	3.4982e-06	5.68665e-06	8.06988e-06	3.92424e-06	6.47744e-06	3.61938e-06	0.00691602	0.000927907	2.87463e-05	0.00303697	0.00128465	0.000389151	0.00100434	0.000161307	0	0.00126608	9.93939e-05	0.00262422	0.00157026	0.000388548	0.000682737	0.00131644	0.0010062	0.00214504	0.00280132	3.51688e-05	2.61005e-05	3.06347e-05	6.41221e-06
371	C8H7NOH	134.06	0.00105283	0.00125969	0.000198202	0.000239813	3.11426e-05	1.75744e-05	0.000466542	0.000545412	0.000235575	0.000366951	0.00412754	0.00151198	8.82257e-05	0.00484072	0.00172492	0.000494356	0.00532534	2.19076e-05	8.30668e-05	0.00137826	0.000114206	0.00190925	0.00235333	0.0018101	0.000746233	0.00170473	0.000681257	0.00234294	0.00213424	3.44438e-05	2.36952e-05	2.90695e-05	7.60034e-06
372	C5H11NO3H	134.081	0.000891994	0.0030005	0.00124772	0.00154752	0.000145254	5.22224e-05	0.00114754	0.0010838	0.0010883	0.000752954	0.00464277	0.00203776	7.32056e-05	0.00546686	0.00240293	0.000622002	0.00835524	1.63941e-05	0.000105311	0.00336384	0	0.00225125	0.0028306	0.00282565	0.00168192	0.00239735	0.000549038	0.00318368	0.00297531	4.08592e-05	1.82431e-05	2.95512e-05	1.5992e-05
373	C9H11NH	134.096	0.00053083	0.00243065	0.00136055	0.0012708	0.000545255	0.000171404	0.00105158	0.000818244	0.00103598	0.000540072	0.00554468	0.00405015	0.000190134	0.0180394	0.00600578	0.00248697	0.0144848	0.000290111	0.000370915	0.00650284	0.000159534	0.00326166	0.00884407	0.00504861	0.00333119	0.00512138	0.00261579	0.00542432	0.00512952	0.000120703	6.41432e-05	9.24232e-05	3.9994e-05
374	C10H14	134.109	0.0489135	0.0657136	0.0306983	0.0197247	0.00502465	0.00141688	0.0285819	0.0251712	0.0196661	0.0175611	0.0203454	0.0160143	0.000296838	0.048016	0.0122629	0.00422571	0.0633869	0.000298381	0.000708394	0.0369611	0.000228219	0.0122188	0.0215015	0.0214646	0.0185947	0.0184449	0.00436836	0.0216176	0.0217007	7.5889e-05	0.000111761	9.3825e-05	2.53654e-05
375	C4H6O3SH	135.011	0	0	0	0	0	2.31229e-06	3.85381e-07	9.43988e-07	3.57249e-07	8.36198e-07	0	0	0	0	0	0	0	0	5.48721e-05	0.000189392	0.000168417	0	0	1.82907e-05	0.000178904	4.92988e-05	8.68329e-05	2.68433e-05	6.52015e-05	2.69838e-05	1.81276e-05	2.25557e-05	6.2623e-06
376	C4H6O5H	135.029	0.000427943	0.00150021	0	0	1.63753e-06	4.54861e-05	0.000329212	0.000597585	8.76281e-05	0.00039721	0	0.0157223	0.00019842	0.00104157	0	0.0013539	0.00142555	0.00140243	0.000614381	0.0038198	0.000543116	0.0053069	0.00079849	0.00114745	0.00218146	0.00235857	0.0020514	0.00351515	0.00581639	7.49539e-05	7.82514e-05	7.66027e-05	2.33165e-06
377	C8H6O2H	135.044	0.0183993	0.0224445	0.00614806	0.000643139	0.000327315	0.00186628	0.00830476	0.00969821	0.0033485	0.0073571	1.30164	0.189124	0.00358212	0.370237	0.141077	0.107973	0.609546	0.02908	0.0122383	0.133043	0.00917138	0.498114	0.206429	0.216955	0.0711071	0.248151	0.179388	0.457543	0.544162	0.00736392	0.00607447	0.00671919	0.000911776
378	C5H10O4H	135.065	0.00487005	0.000913476	0	0.000507236	1.80123e-05	0.000113585	0.00107039	0.00189462	0.000423115	0.001049	0.0389105	0.00201955	0.00088343	0.013076	0.0057447	0.00597171	0.00810943	0.00241172	0.00121539	0.00986331	0.00146694	0.0139378	0.00826413	0.00391218	0.00566512	0.00794481	0.00437711	0.0123181	0.0155339	0.000603849	0.000396937	0.000500393	0.000146308
379	C9H10OH	135.08	0.983768	2.45046	0.312719	0.43428	0.0320179	0.00448566	0.702955	0.926834	0.389722	0.586919	1.18207	0.464663	0.0061368	1.02298	0.693151	0.163113	1.49249	0.00745701	0.0173215	0.45318	0.00274934	0.550958	0.626413	0.505756	0.227965	0.477773	0.173817	0.665913	0.596425	0.00124357	0.00203054	0.00163706	0.000556475
380	C10H14H	135.117	11.7153	17.6549	5.76704	4.15212	0.844801	0.188104	6.72037	6.77067	4.17167	4.58606	3.7719	2.49065	0.0708875	6.49726	2.29737	0.745285	9.67296	0.047629	0.108976	4.60174	0.0790328	2.11114	3.17997	3.27652	2.34039	2.72701	0.587624	3.38601	3.27298	0.00539931	0.0182616	0.0118305	0.00909504
381	C7H5NSH	136.022	2.6831e-05	0.000388814	7.72164e-05	0.000538639	0.000104566	0.000770525	0.000317765	0.000298926	0.000397173	0.00027064	0.00110347	0.000965868	0.000471084	0.00505475	0.00466226	0.0026862	0.0115321	0	0.00167642	0.0161614	0.0018583	0.000846806	0.0041344	0.00440284	0.00900985	0.00459848	0.00335604	0.003802	0.0051125	0.000177571	0.000186555	0.000182063	6.35247e-06
382	C7H5O2NH	136.039	9.96277e-05	5.91095e-05	5.34944e-06	6.06962e-05	1.51199e-06	0	3.77158e-05	4.1472e-05	3.27e-05	3.13432e-05	0.127691	0.0383235	0.000574311	0.0738567	0.126886	0.0215811	0.0797821	0.000422639	0.00182782	0.039139	0	0.0555296	0.0741081	0.0273442	0.0195695	0.0441378	0.0252561	0.0565109	0.0509247	3.28004e-05	4.12125e-05	3.70064e-05	5.94825e-06
383	C4H9NO4H	136.06	0.000210497	0.000287083	0.000293697	0.000351286	2.36921e-05	1.37512e-05	0.000196667	0.00014496	0.000230411	0.000148742	0.0143398	0.000776892	0	0.0118722	0.0109073	0.0020718	0.0163674	0	0.000412628	0.00304507	0	0.00503888	0.00828376	0.00559334	0.00152254	0.00510963	0.00277977	0.00682771	0.0072947	4.65361e-05	3.01528e-05	3.83444e-05	1.15848e-05
384	C8H9NOH	136.076	0.000312589	0.000207104	0.000642377	0.000162649	4.39041e-05	2.20816e-05	0.000231784	0.000227938	0.000220712	0.000216108	0.00172199	0.000236883	6.20131e-05	0.00398471	0.00165078	0.000394433	0.00824734	0	8.29326e-05	0.00196646	0	0.000673628	0.00200997	0.00277676	0.00098323	0.0016109	0.000964527	0.00202206	0.00286565	5.87834e-05	3.21973e-05	4.54903e-05	1.87992e-05
385	C9H13NH	136.112	1.68016e-06	0	0.000713233	0.00054045	9.69479e-05	0.000673068	0.000337563	0.000340446	0.000484936	0.000281599	0.000787094	0.000668099	0.000282395	0	0	0.000450668	0.0077033	0	0.000312907	0	0.000330423	0.000579196	0.000150223	0.00267207	0.000165211	0.000891675	0.00120346	0.00157188	0.0027477	0.00219119	0.00100701	0.0015991	0.00083734
386	CFCl3H	136.912	0.000214422	0.000244958	0.000102405	9.96235e-05	2.70545e-05	3.18443e-06	0.000115275	9.73709e-05	8.40271e-05	6.58107e-05	0	0	3.78405e-06	0	0	4.6638e-06	0.00266164	0	5.94743e-05	0.000455286	0.000151402	1.26135e-06	1.5546e-06	0.000907038	0.000303344	0.0003033	0.000426918	0.000461365	0.000969342	7.27449e-06	4.3284e-06	5.80145e-06	2.0832e-06
387	C7H4OSH	137.006	1.27522e-06	0	7.19992e-06	3.20269e-05	3.6815e-05	3.19258e-05	1.82071e-05	1.7116e-05	2.56453e-05	1.45052e-05	0	0.000391979	0.000113019	0.00120305	0.00150982	0.00182443	0.00118083	0.000624911	0.000737265	0.000791355	0.000622905	0.000168333	0.00151243	0.000847667	0.00070713	0.00080889	0.000552914	0.00055194	0.000519885	6.43095e-05	4.76984e-05	5.6004e-05	1.17458e-05
388	C7H4O3H	137.023	9.79943e-07	0	9.68345e-06	0	5.90801e-06	1.20369e-05	4.76806e-06	5.25577e-06	4.65143e-06	4.90861e-06	0.338456	0.0700691	0.000789739	0.234769	0.231516	0.0900552	0.196	0.00217987	0.00231309	0.143679	0.00112505	0.136438	0.185447	0.0668309	0.0724019	0.115279	0.0564414	0.143546	0.132981	0.000336243	0.000270015	0.000303129	4.683e-05
389	C4H8O5H	137.044	0.000166696	0.000268571	0.00017624	0.000149101	8.39204e-05	4.31246e-05	0.000147942	7.84737e-05	0.000133745	5.61212e-05	0.0065756	0.00445669	0.000438599	0.0265218	0.0102581	0.00434328	0.00776797	0.000341564	0.000979967	0.00680507	0	0.00382363	0.0137077	0.00302983	0.00340253	0.00599093	0.00515474	0.00509026	0.0048067	0.000129111	6.83215e-05	9.87161e-05	4.29844e-05
390	C8H8O2H	137.06	0.0270219	0.0856856	0.00637766	0.00775571	0.00167392	0.0011782	0.0216155	0.0327837	0.00962147	0.020918	1.27536	0.283899	0.00151012	0.70507	0.262743	0.0258932	0.916997	0.00866127	0.00401171	0.34727	0	0.520255	0.331235	0.30989	0.173635	0.333754	0.142591	0.537929	0.545404	0.00126017	0.00148134	0.00137076	0.000156391
391	C5H12O4H	137.081	0.00154415	0.00345624	0.000932846	0.000875506	0.000231892	0.000150774	0.00119857	0.00121851	0.000811241	0.000777683	0.0588683	0.0144805	5.14224e-05	0.04794	0.017257	0.00668174	0.0333796	0.00095248	0.000308476	0.0149418	0	0.0244667	0.0239596	0.0115469	0.00747089	0.016861	0.00865354	0.0242592	0.0237551	0.000263438	0.000172583	0.00021801	6.42442e-05
392	C9H12OH	137.096	0.0185359	0.0599025	0.00495229	0.0030659	0.000852242	0.000273709	0.0145971	0.0231869	0.00567454	0.0150995	0.495427	0.0912418	0	0.281638	0.0565344	0.0183017	0.59196	0.00146763	0.000689645	0.145709	0.000452171	0.195556	0.118825	0.198039	0.0730804	0.146375	0.0611531	0.242355	0.259464	0.0010869	0.00083212	0.000959509	0.000180156
393	C8H12N2H	137.107	0.000455168	0.00185778	0.000645463	0.000477908	0.000123756	9.44268e-05	0.000609083	0.000648362	0.000457359	0.000394659	0.0433755	0.0123374	0.000555617	0.0310763	0.0159955	0.00724371	0.0353448	0.00132247	0.000141899	0.0052469	0.000588684	0.0187562	0.0181051	0.0122697	0.00291779	0.0130122	0.00733438	0.019603	0.0187545	0.000160489	0.000114004	0.000137247	3.28699e-05
394	C10H16H	137.132	0.142095	0.144616	0.120312	0.075183	0.0103075	0.0152481	0.084627	0.060993	0.0696513	0.0462513	3.9715	1.53473	0.383766	3.87736	1.93681	1.19656	9.4014	0.353155	0.49547	3.04517	0.981156	1.96333	2.33691	3.41668	2.01316	2.43252	0.676683	3.18578	3.09437	0.00460396	0.00616994	0.00538695	0.00110731
395	C6H3O3NH	138.019	0.000144625	7.69478e-05	4.4952e-05	4.87097e-05	1.54258e-05	9.96533e-06	5.67709e-05	4.94576e-05	4.10118e-05	3.01122e-05	0.0136932	0.00030586	0.000102529	0.00496933	0.00505817	0.000957931	0.001488	0	0.000219945	0.00318273	0.000197219	0.00470051	0.00366181	0.000569314	0.00168997	0.0026554	0.00186897	0.00394857	0.00562895	2.57062e-05	1.86792e-05	2.21927e-05	4.96882e-06
396	C7H7NO2H	138.055	0.00112166	0.0017348	0.000474427	0.000465992	0.000102815	5.19298e-05	0.000658604	0.000651244	0.000424286	0.000430566	0.00877259	0.00198781	0.000303816	0.00652423	0.000698827	0	0.0110337	0	0.000368038	0.00191097	0.00032653	0.00368807	0.00240769	0.00380059	0.00111875	0.00275377	0.00125987	0.00449264	0.00467797	6.13171e-05	4.37368e-05	5.2527e-05	1.24312e-05
397	C8H11NOH	138.091	0.0025234	0.00564897	0.00152098	0.00289458	0.00012227	2.73118e-05	0.00212292	0.00209501	0.00187372	0.00147766	0.00336249	0.000225617	2.21334e-05	0.00404843	0.00160548	0.000539728	0.00799723	0	8.21399e-05	0.00159542	5.34844e-06	0.00120341	0.00206454	0.00269312	0.000800386	0.00169037	0.000851414	0.00233514	0.00288247	7.20857e-05	4.22521e-05	5.71689e-05	2.10955e-05
398	C9H15NH	138.128	0.00264138	0.004359	0.00187614	0.00196238	0.000273017	0.000104778	0.00186945	0.00157893	0.00152612	0.00108413	0.0101049	0.00413557	0.00200311	0.0167316	0.0114992	0.00563228	0.0301496	0.000379956	0.00177871	0.0111206	0.00371074	0.00541453	0.0112877	0.0107694	0.00741565	0.00872183	0.00279409	0.00982857	0.00971724	5.81917e-05	5.15886e-05	5.48901e-05	4.66908e-06
399	C6H2O4H	139.003	5.66905e-06	1.03633e-05	2.13836e-05	2.60031e-05	3.14304e-05	2.03813e-05	1.92051e-05	9.62498e-06	2.37769e-05	7.27092e-06	0	5.82577e-05	0.000182593	0	0.000135859	0	0	0.000491213	9.08165e-05	0	0	8.02836e-05	4.52864e-05	0.00019401	0	7.9895e-05	8.28721e-05	8.96911e-05	0.000156986	7.34954e-06	2.44985e-06	4.89969e-06	3.46461e-06
400	C7H6OSH	139.021	5.25386e-05	0	9.12701e-06	3.67849e-06	1.66742e-05	1.35876e-05	1.59343e-05	1.89545e-05	9.55823e-06	1.11913e-05	0.00280865	0.0034623	0.00117356	0.00465341	0.0105369	0.0077442	0.00364429	0.00103781	0.000921542	0.00270449	0.0015687	0.0024815	0.00764484	0.00186788	0.0021366	0.0035327	0.0027529	0.00280068	0.00179055	0.000110044	7.54829e-05	9.27635e-05	2.44384e-05
401	C7H6O3H	139.039	2.00115e-05	0	0	5.77903e-06	4.93125e-06	7.41368e-06	6.35591e-06	7.35868e-06	4.96373e-06	3.96938e-06	0.490945	0.0410868	0.000790426	0.0440474	0.0321221	0.0473405	0.0725859	0.00140914	0	0.00463745	0	0.177607	0.04117	0.024665	0.00231872	0.0614403	0.0790643	0.134888	0.209996	0.000553662	0.000742042	0.000647852	0.000133204
402	C4H10O3SH	139.042	8.70201e-06	1.37006e-05	6.28942e-05	9.33243e-05	1.779e-05	6.06763e-05	4.28479e-05	3.43831e-05	6.46762e-05	3.71339e-05	0.171132	0.015254	0.000874036	0.0182261	0.00139788	0.00725673	0.0529223	0.000282152	0	0.00161706	0	0.06242	0.00896022	0.0177348	0.000808529	0.0224809	0.0275085	0.0513195	0.0738483	0.000921639	0.000613587	0.000767613	0.000217826
403	C8H10SH	139.058	3.2591e-05	0.000100922	9.39254e-05	9.10028e-05	3.33271e-05	3.10289e-06	5.91453e-05	4.11882e-05	6.77636e-05	3.67465e-05	0.00107856	0.000818495	0.000434072	0.00317997	0.00243481	0.00209329	0	0.000856186	0	0.00195325	0	0.000777041	0.00256936	0.000285395	0.000976626	0.00115211	0.000988476	0.000814797	0.000798753	2.69603e-05	2.00955e-05	2.35279e-05	4.8542e-06
404	C8H10O2H	139.075	0.0087388	0.0201439	0.00337265	0.00394503	0.000589862	0.000109929	0.00615002	0.00751669	0.00359757	0.00479228	0.715461	0.111798	0.000188627	0.227897	0.0866905	0.0506605	0.522856	0.00618142	0.00191624	0.10342	0	0.275816	0.121749	0.176985	0.0517098	0.156565	0.0945947	0.283236	0.318619	0.00464445	0.00300528	0.00382487	0.00115907
405	C9H14OH	139.112	0.00162446	0.00608833	0.000914255	0.00105314	0.000732221	0.000281524	0.00178232	0.00215439	0.00110154	0.00131278	0.649746	0.151936	0.000732776	0.505781	0.132558	0.0422058	1.02726	0.00539648	0.00229473	0.272076	0	0.267471	0.226848	0.344985	0.136038	0.243836	0.0869842	0.373914	0.395889	0.00145066	0.00107114	0.0012609	0.00026836
406	C10H18H	139.148	0.0531731	0.100376	0.035686	0.0359254	0.00952093	0.0036312	0.0397189	0.0349435	0.0302285	0.0228544	1.80198	0.777722	0.109439	1.98885	0.913471	0.447793	4.59708	0.184815	0.157237	1.15045	0.242038	0.896379	1.11671	1.64638	0.696242	1.08893	0.40939	1.48359	1.53486	0.00558397	0.00639181	0.00598789	0.000571223
407	C6H5NO3H	140.034	0.00126696	0.00219745	0.000144282	0.000561096	0.000127462	0.000141014	0.00073971	0.000839371	0.000444397	0.000546381	0.436	0.149738	0.12232	0.160426	0.856	0.459518	0.071361	0.0386935	0.0679419	0.0568688	0.0481146	0.23602	0.491981	0.0593321	0.0524917	0.209956	0.206317	0.189701	0.183545	0.000131793	0.000162352	0.000147073	2.16081e-05
408	C7H9NO2H	140.071	2.79389e-05	9.31876e-05	3.69053e-05	3.85279e-05	9.78447e-06	8.92455e-06	3.58781e-05	3.08638e-05	3.13454e-05	1.92435e-05	0.0140085	0.00444415	0.0015516	0.0101726	0.013232	0.00797745	0.0111156	0.000704628	0.000323051	0.0020315	0.000442302	0.00666808	0.0104607	0.00404776	0.0012369	0.00560335	0.00392484	0.0067844	0.00560348	5.80058e-05	3.28101e-05	4.54079e-05	1.78161e-05
409	C6H9N3OH	140.082	4.56804e-05	0.000126304	5.97618e-05	5.8575e-05	8.20704e-06	7.11967e-06	5.09412e-05	4.37945e-05	4.57309e-05	2.95783e-05	0.00137968	0.000146038	0	0.00202954	0	0	0.00700419	0.000158659	0	0.000331022	0	0.000508574	0.000676514	0.00238761	0.000165511	0.000934554	0.000991776	0.00154114	0.00250278	8.59165e-05	4.78174e-05	6.6867e-05	2.69402e-05
410	C8H13NOH	140.107	9.40542e-05	0.000317853	0.000171253	0.000164882	1.12877e-05	4.31342e-05	0.000133744	0.000110502	0.000128318	7.64111e-05	0.00041967	0.000162165	0	0.00185626	0	0	0.00495626	0	0	0.000946207	0	0.000193945	0.000618753	0.00165209	0.000473104	0.000734472	0.000636629	0.00101693	0.00176131	5.80616e-05	2.13114e-05	3.96865e-05	2.59864e-05
411	C9H16O	140.12	0.000202547	0.000317938	9.54658e-05	0.000176496	1.87649e-05	2.05746e-05	0.000138631	0.00011648	0.000119706	8.31128e-05	0.0031674	0.00209148	0	0.00407139	0.000982085	0	0.0108753	0.000222964	2.00493e-05	0.00206639	6.14355e-05	0.00175296	0.00168449	0.00370611	0.00106391	0.00205187	0.00114555	0.00310686	0.00372576	5.45018e-05	3.81639e-05	4.63329e-05	1.15526e-05
412	C9H17NH	140.143	0.00100412	0.00102295	0.000551779	0.00139781	5.15298e-05	9.49975e-06	0.000672947	0.000565438	0.000785043	0.000602144	0.00210398	0.00282504	0.000544628	0.00368191	0.01712	0.00215959	0.0100392	0.000334324	0.000625722	0.0036041	0.000557269	0.00182455	0.00765382	0.00366643	0.00208069	0.00380637	0.00269123	0.00344038	0.00378562	6.49255e-05	5.07681e-05	5.78468e-05	1.00108e-05
413	C6H4O4H	141.018	9.47139e-05	9.03371e-05	5.10639e-06	5.36821e-06	1.19375e-05	1.1037e-05	3.64167e-05	4.35745e-05	1.3713e-05	3.19662e-05	0.00704658	0.000172562	0.000145597	0	0	0.000541705	0.000350546	0	0.000218005	0	0.000223387	0.00245491	0.000180568	0.000189517	0.000111693	0.000734173	0.00114769	0.00175518	0.00307677	1.31757e-05	2.67726e-05	1.99742e-05	9.61448e-06
414	C7H8OSH	141.037	0.000866509	5.45338e-05	9.55956e-06	1.34723e-05	5.09508e-05	6.31005e-05	0.000176354	0.000338838	5.36218e-05	0.000189625	0	0.00104177	0.00040785	0.000815836	0.00303024	0.0016271	0	0.00194992	0.000777454	0.00100867	0.00176215	0.000483206	0.00182439	0.000909126	0.00138541	0.00115053	0.00058105	0.000776471	0.00086597	7.69548e-05	4.81274e-05	6.25411e-05	2.0384e-05
415	C7H8O3H	141.055	0.00106428	0.000210448	0.000264549	0.000146716	0.000262787	0.000248386	0.000366195	0.000344864	0.000233258	0.000204826	0.227022	0.0557766	0.00292558	0.057963	0.0997449	0.0271095	0.150152	0.00882693	0.00519571	0.0274204	0.00184736	0.0952414	0.0616058	0.0547247	0.0146339	0.0565514	0.0330801	0.0932764	0.0949618	0.00133734	0.000806615	0.00107198	0.000375281
416	C11H8H	141.07	0.000490811	0.00180844	0.000560527	0.000703095	4.31544e-05	1.84199e-05	0.000604075	0.000653093	0.000511493	0.000414475	0.0473557	0.0115705	0.000776054	0.0269327	0.010594	0.00425806	0.055746	0.00025572	0.000787356	0.00578975	0	0.0199007	0.0139283	0.0189297	0.00289487	0.0139134	0.00779785	0.0232452	0.0245215	1.65458e-06	4.05472e-05	2.11009e-05	2.75012e-05
417	C8H12SH	141.073	0.000571372	0.000867888	0.000485232	0.000867572	3.12218e-05	7.72978e-05	0.000483431	0.000366755	0.00053436	0.000355917	0.00244196	0.00279459	0.00017033	0.0104036	0.00100564	0.00206917	0.0130982	0.0018824	0.00045734	0.00244144	0	0.00180229	0.00449282	0.00514597	0.00122072	0.00316545	0.0019429	0.00385978	0.00437912	6.2104e-05	4.87881e-05	5.5446e-05	9.41576e-06
418	C8H12O2H	141.091	0.000248345	0.000264242	5.78351e-05	3.91496e-05	0.000238941	0.000157323	0.000167639	9.96017e-05	0.000108249	0.000103618	0.687244	0.10778	0.000700236	0.303629	0.0842056	0.0462806	0.781348	0.00456385	0.00049857	0.181925	0	0.265242	0.144705	0.262137	0.0909625	0.190761	0.0870302	0.323502	0.353357	0.00532785	0.00357211	0.00444998	0.00124149
419	C9H16OH	141.127	0.00204933	0.00827072	0.00165516	0.00213359	0.00123595	0.000693558	0.00267305	0.00279406	0.00195468	0.00163333	0.42436	0.121474	0.000801959	0.417589	0.116313	0.0303196	0.830924	0.00190265	0.00173241	0.187578	0	0.182212	0.188074	0.278186	0.093789	0.185565	0.0753196	0.276829	0.302903	0.00100601	0.000814694	0.00091035	0.000135278
420	C10H20H	141.164	0.032485	0.057433	0.0240768	0.0262208	0.00640328	0.00550895	0.0253546	0.0191585	0.021142	0.0128375	1.11417	0.487263	0.0396751	1.26681	0.622411	0.224868	3.56622	0.101756	0.0810876	0.724063	0.0868492	0.547036	0.704697	1.24969	0.405456	0.726719	0.369449	1.02597	1.20505	0.0045096	0.00515064	0.00483012	0.000453289
421	C5H3NO4H	142.013	0.000163801	0.000175443	0	0	3.4698e-07	4.81276e-07	5.66787e-05	8.75631e-05	1.29369e-05	6.27381e-05	0.00871575	0.00104645	1.53104e-05	0.000983177	0.000884772	0.000420413	0.00377997	0	0.00062747	0	0	0.00325917	0.000762787	0.00146915	0	0.00137278	0.00139336	0.00287321	0.00374756	0	5.59631e-05	2.79816e-05	3.95719e-05
422	C6H7NO3H	142.05	0.000180321	0.000401868	0.000146759	0.000129749	2.69528e-05	2.80882e-05	0.00015229	0.000137658	0.000115172	8.86497e-05	0.0225726	0.00312135	0.000280783	0.00709678	0.00793709	0.00243945	0.0181311	0	0.000475544	0.00214072	0.000384787	0.00865825	0.00582444	0.00620222	0.00126275	0.00548692	0.00308364	0.00921302	0.0101585	7.98963e-05	5.31871e-05	6.65417e-05	1.88862e-05
423	C11H10	142.078	0.00639118	0.00920492	0.00298265	0.00249997	0.000254118	4.59744e-05	0.00356314	0.00359485	0.00228449	0.00241246	0.0291621	0.0132925	1.76577e-05	0.0400078	0.0108567	0.00137382	0.079162	0.000399985	0.000231162	0.0141815	0.000404956	0.0141574	0.0174128	0.0265977	0.00729324	0.0163653	0.00802032	0.0238731	0.0275355	8.63385e-05	6.094e-05	7.36392e-05	1.79594e-05
424	C7H11NO2H	142.086	0.000131782	0.000140941	0.000173808	0.000232245	5.54557e-05	1.53966e-05	0.000124938	7.87822e-05	0.000153144	8.92339e-05	0.00599039	0.00163614	1.55573e-05	0.00493239	0.000927539	0	0.012531	0	4.51569e-05	0.00305943	0	0.00254736	0.00195331	0.00419207	0.00152971	0.00255561	0.00116809	0.00399826	0.00456233	9.91877e-05	4.88974e-05	7.40426e-05	3.55606e-05
425	C8H15NOH	142.123	7.91332e-05	9.15702e-05	0.000127132	0.00024518	1.94685e-05	7.332e-05	0.000105967	7.6555e-05	0.000149314	9.83551e-05	0.00142554	0.000199969	2.31343e-05	0.00258813	0.000625188	0.000316966	0.00508992	0	0.000332093	0.00110601	7.23944e-05	0.000549547	0.00117676	0.00180734	0.000589201	0.00103071	0.00059187	0.00134776	0.00176364	5.34664e-05	4.59755e-05	4.9721e-05	5.29685e-06
426	C9H18O	142.135	4.7382e-05	8.47487e-05	4.67487e-05	7.35875e-05	1.42936e-05	1.31626e-05	4.66539e-05	2.94823e-05	4.96808e-05	2.66217e-05	0.00206006	0.000571388	0	0.00329342	0.0010755	0.000468342	0.00612644	0.000267638	0.000204063	0.00204326	0.000573721	0.000877148	0.00161242	0.00219938	0.00130849	0.00149936	0.000555696	0.00187283	0.00204898	5.03052e-05	2.76239e-05	3.89646e-05	1.60381e-05
427	C9H19NH	142.159	0.000247211	0.000549046	0.000228363	0.000273123	4.29469e-05	4.58018e-05	0.000231082	0.000185935	0.00020553	0.000126816	0.000760846	0.00035434	0.000130463	0.00203391	0.00173981	0.0011542	0.0102483	0	0.000602185	0.00284608	0.000800839	0.000415217	0.00164264	0.00361682	0.00182346	0.00187453	0.00131929	0.00223317	0.00354566	5.34142e-05	4.87607e-05	5.10875e-05	3.29057e-06
428	C5H2O5H	142.997	0	8.34643e-07	0	0	0	1.05862e-06	3.15544e-07	4.93944e-07	2.01116e-07	4.2088e-07	0	0	9.91498e-06	0	0	0	0.00295396	0	0	0	2.04149e-05	3.30499e-06	0	0.000984654	1.02075e-05	0.000249542	0.000490093	0.000465935	0.00109532	0	0	0	0
429	C6H6O4H	143.034	0.000100717	0	0	0	0	4.04333e-05	2.35251e-05	4.11297e-05	9.26847e-06	2.59664e-05	0.0141043	0.000256063	7.50829e-05	0	0	0.00179161	0	0	0.000116991	0	0	0.0048118	0.000597203	3.8997e-05	0	0.001362	0.00231599	0.00333043	0.00622714	0.000124218	0.000100926	0.000112572	1.64699e-05
430	C7H10O3H	143.07	0.000573908	0.000707045	0.00159397	0.000255148	0.000320479	0.000190176	0.000606787	0.000522463	0.000540816	0.000527873	0.131037	0.0108334	0.000680211	0.0495708	0.0208696	0.0167474	0.0206308	0.00465816	0.00115728	0.00712549	0	0.047517	0.0290626	0.0088154	0.00356274	0.0222394	0.0201207	0.038528	0.054052	0.00201024	0.00105715	0.00153369	0.000673939
431	C11H10H	143.086	0.628464	0.772016	0.268111	0.210554	0.0271453	0.00315507	0.318241	0.316315	0.198971	0.214458	1.77711	0.932312	0.00281926	1.86943	0.872707	0.139872	4.5929	0.00792809	0.0109622	0.88123	0.00208489	0.904079	0.96067	1.53726	0.441658	0.960918	0.449087	1.42668	1.59383	0.00347519	0.00306949	0.00327234	0.000286876
432	C8H14O2H	143.107	0.0219839	0.0294228	0.0114355	0.00690895	0.0014231	0.000352743	0.0119212	0.0116358	0.00737841	0.0080776	0.657963	0.184873	0.00105264	0.546923	0.173558	0.0478775	1.24935	0.00557486	0.00331463	0.594427	0	0.281296	0.25612	0.419413	0.297213	0.313511	0.0726003	0.439598	0.453568	0.00222929	0.00148188	0.00185558	0.000528496
433	C9H18OH	143.143	0.00269343	0.0129127	0.00155171	0.00172461	0.00400365	0.00204483	0.00415515	0.00438161	0.0026257	0.00283058	0.27582	0.121334	0.00661426	0.338939	0.121693	0.0315435	0.65109	0.00574634	0.00643764	0.173033	0.00295808	0.134589	0.164059	0.221091	0.0879955	0.151934	0.0557336	0.21257	0.225174	0.0136093	0.0169844	0.0152969	0.00238655
434	C10H22H	143.179	1.6103e-05	4.4824e-05	8.35351e-05	4.54213e-05	8.97845e-05	6.17863e-05	5.6909e-05	2.74105e-05	6.11771e-05	2.04616e-05	0.000505582	0.00035691	0.000231325	0.00705824	0.0026627	0.00112195	0.0077793	0	0.000104349	0	6.58553e-05	0.000364606	0.0036143	0.00262788	3.29276e-05	0.00165993	0.00173987	0.00169385	0.00287778	0.000161213	0.000146684	0.000153948	1.02734e-05
435	C5H5NO4H	144.029	7.05142e-05	8.83751e-05	2.31784e-05	1.48013e-05	2.28442e-06	5.34402e-06	3.40829e-05	3.63391e-05	1.79885e-05	2.5239e-05	0.00158398	0.000127176	8.42474e-05	9.25237e-05	0.000176318	7.50245e-05	0.00103723	8.19069e-05	8.85805e-05	0.000142452	9.35557e-05	0.000598466	0.000114622	0.000402572	0.000118004	0.000308416	0.000235802	0.000594362	0.000696012	1.75445e-05	1.48526e-05	1.61985e-05	1.90345e-06
436	C9H5ONH	144.044	0.000930545	0.0014381	0.000130632	0.000102932	6.59145e-06	3.43821e-07	0.000434858	0.000604507	0.000162399	0.000417938	0.0123203	0.00132902	4.63031e-05	0.00260701	0	0	0.00372171	0.000504035	4.41499e-05	0.00122611	0.000190931	0.0045652	0.000869003	0.0014233	0.000708519	0.00189151	0.00180858	0.00389455	0.00516844	0	1.97731e-05	9.88653e-06	1.39817e-05
437	C6H9NO3H	144.066	0.00102564	0.00217996	0.00079079	0.000678591	4.98923e-05	3.9638e-05	0.000794085	0.000788749	0.000582142	0.000516928	0.0164399	0.00389437	7.29551e-07	0.0121813	0.00322266	0	0.0135453	0	6.92173e-05	0.0021754	0	0.00677834	0.00513466	0.00453818	0.0010877	0.00438472	0.00239344	0.00716264	0.00741599	0.000155234	6.27579e-05	0.000108996	6.53908e-05
438	C10H9NH	144.081	0.00212918	0.0056767	0.00138345	0.00122812	0.000170054	0.000163436	0.00179182	0.00204804	0.00115704	0.00129054	0.0097766	0.00339053	0.000218541	0.0110228	0.00451473	0.0010312	0.0202544	0.000658668	0.000306598	0.0060693	0.00011093	0.00446189	0.0055229	0.00707324	0.00309011	0.00503703	0.0016836	0.00696108	0.00707529	0.000350671	0.000158656	0.000254663	0.000135775
439	C7H13NO2H	144.102	6.15088e-05	0.000208867	0.000168642	0.000213309	5.36357e-05	2.94359e-05	0.000122566	8.36153e-05	0.000146946	8.0163e-05	0.00667778	0.00149812	2.37622e-05	0.00599881	0.00150153	0.000611078	0.0118432	0.000344885	7.78915e-05	0.00367355	0.000140643	0.00273322	0.00270381	0.00408866	0.0019071	0.0028582	0.000905188	0.00416594	0.0043616	0.000114691	4.74186e-05	8.10546e-05	4.75685e-05
440	C8H17NOH	144.138	1.75303e-05	1.84369e-05	3.55514e-05	8.27676e-05	4.16094e-05	4.02788e-05	3.93624e-05	2.37442e-05	5.59738e-05	2.8955e-05	0.00199319	0.00125238	8.89184e-05	0.00374034	0.00416277	0.00076078	0.00422788	0.000139059	8.79166e-05	0.00285626	8.41218e-05	0.0011115	0.00288796	0.00148495	0.00147019	0.00173865	0.000785425	0.0017656	0.00148127	8.60361e-05	9.61903e-05	9.11132e-05	7.18005e-06
441	C6H2Cl2H	144.961	5.33574e-06	1.80852e-06	6.63167e-07	0	2.05302e-06	1.55621e-06	1.90278e-06	1.849e-06	9.25746e-07	1.48601e-06	0	0	1.31632e-05	1.26273e-05	2.17476e-05	7.44363e-05	6.7769e-05	0	3.69996e-05	0.000243963	0	4.38774e-06	3.62704e-05	3.49229e-05	0.000121982	4.93906e-05	5.05838e-05	3.08233e-05	6.42681e-05	6.341e-06	3.18363e-06	4.76232e-06	2.23259e-06
442	C5H4O5H	145.013	3.3003e-05	5.63814e-05	9.87309e-06	2.78857e-06	5.48948e-05	6.9368e-05	3.77182e-05	2.70656e-05	2.57968e-05	2.97206e-05	0	0	5.71098e-05	0	0	8.81981e-05	0	0	0	0	0	1.90366e-05	2.93994e-05	0	0	1.2109e-05	1.46083e-05	5.01991e-06	1.83417e-05	2.77391e-05	5.08432e-05	3.92911e-05	1.6337e-05
443	C6H8O4H	145.05	0.000129869	0.000427555	9.09267e-05	1.46161e-05	9.39935e-05	9.51234e-05	0.000142014	0.000144932	7.59334e-05	0.00010847	0.000114886	0.00222775	0.000688127	0.00969984	0.00805446	0.00368741	0	0.000906293	0.00087158	0	0	0.00101026	0.00714724	0.000592624	0	0.00218753	0.00333235	0.00110073	0.00227945	0.000313941	0.000214413	0.000264177	7.03771e-05
444	C10H8OH	145.065	0.084621	0.0905904	0.0161866	0.0118928	0.000843925	0.000348369	0.0340805	0.0419588	0.0149455	0.0289341	1.08719	0.235626	0.00172578	0.719668	0.296343	0.060204	0.858009	0.0062117	0.00279187	0.325058	0	0.441513	0.358739	0.289004	0.162529	0.312946	0.118075	0.476429	0.470546	0.000539828	0.000597103	0.000568465	4.04997e-05
445	C7H12O3H	145.086	0.00238722	0.00260166	0.001496	0.00109349	0.000310541	0.000147803	0.00133945	0.00102515	0.00100997	0.000719705	0.0678318	0.0140875	0.000251235	0.0650973	0.0187591	0.00721588	0.0330578	0.00265146	0.00084602	0.0335977	0	0.0273902	0.0303574	0.0121851	0.0167988	0.0216829	0.00860005	0.0281852	0.0267985	0.00212881	0.00125298	0.0016909	0.000619302
446	C11H12H	145.101	0.121433	0.347484	0.0641627	0.05808	0.00554531	0.000582855	0.099548	0.12927	0.0571657	0.0814189	1.10925	0.286475	0.0017713	0.916088	0.189325	0.0662065	1.81014	0.00732556	0.0061424	0.523805	0.00115823	0.465831	0.39054	0.60787	0.262482	0.431681	0.144372	0.656411	0.689069	0.000717964	0.00124315	0.000980557	0.000371363
447	C8H16O2H	145.122	2.44277e-05	0.00105401	0.000942324	0.00119044	0.00065425	0.000406401	0.000711974	0.000440091	0.000897953	0.000376584	0.114327	0.0891276	0.00164459	0.0915103	0.0998514	0	0.140594	0.00409712	0.000483557	0.0680682	0	0.0683663	0.0637872	0.0483917	0.0340341	0.0536448	0.015618	0.073897	0.0567399	0.00065671	0.000306841	0.000481775	0.000247395
448	C9H20OH	145.159	0	0	0	2.95139e-06	0	1.0526e-05	2.24624e-06	4.22456e-06	2.88061e-06	3.5951e-06	0	0.000197702	0.00015252	0	0.000541755	0	0	0	0	0.00234276	0	0.000116741	0.000180585	0	0.00117138	0.000367176	0.000541324	0.000210082	0.000593562	0	0	0	0
449	C6H3Cl2H	145.968	5.74705e-05	7.23737e-05	1.16866e-05	1.44734e-05	9.30588e-06	3.00273e-06	2.80521e-05	2.91923e-05	1.52659e-05	1.98776e-05	0.00162503	4.32194e-05	0.000150274	0.00439059	0.00102948	0.00195318	0.000822334	0.00021784	0.000168785	0.000577797	0.00034175	0.000606174	0.00245775	0.000402986	0.000459773	0.000981671	0.000987768	0.000782177	0.000883476	5.03091e-06	9.11194e-06	7.07143e-06	2.88572e-06
450	C5H7NO4H	146.045	7.56761e-05	6.52787e-05	3.8335e-05	1.95381e-05	7.65149e-06	9.33989e-06	3.59699e-05	2.90595e-05	2.34587e-05	2.08623e-05	0.0104932	0.001376	4.50754e-05	0.00418613	0.00144485	0.000475645	0.00277074	0.000184063	8.92956e-05	0.00114089	5.03266e-05	0.00397143	0.00203554	0.0010147	0.000595609	0.00190432	0.00150491	0.0033604	0.0042927	2.25773e-05	1.84696e-05	2.05234e-05	2.90456e-06
451	C9H7ONH	146.06	0.000841159	0.00162677	0.000412457	0.00016566	2.09453e-05	3.02514e-05	0.000516207	0.000625144	0.000255534	0.000432818	0.00626267	0.00228518	5.41512e-05	0.00487132	0.00328697	0.00072245	0.00608666	0.000177819	3.80042e-05	0.00122356	0	0.00286733	0.00296025	0.00210083	0.000611779	0.00213505	0.00108608	0.003124	0.00283146	3.50789e-05	2.0151e-05	2.7615e-05	1.05556e-05
452	C6H11NO3H	146.081	0.000490615	0.00123579	0.000443363	0.000455414	9.79688e-05	5.48221e-05	0.000462995	0.000423855	0.000372168	0.000270781	0.00732592	0.00156784	3.51301e-05	0.00255821	0.00113234	0.000231528	0.00452799	0.000499184	0.000180296	0.000807242	0	0.00297629	0.00130736	0.00173582	0.000403621	0.00160577	0.00106918	0.00289967	0.00309813	5.30864e-05	2.88214e-05	4.09539e-05	1.7158e-05
453	C10H11NH	146.096	0.0151855	0.0251938	0.0076841	0.00745045	0.000734368	8.17568e-05	0.00938834	0.00950353	0.00634948	0.0062732	0.0170604	0.0065846	2.94139e-05	0.0237652	0.0184858	0.00200409	0.0344876	0.000114871	0.000303863	0.0162929	5.70893e-05	0.00789146	0.0147517	0.0116355	0.008175	0.0106134	0.00324165	0.012692	0.012059	3.78436e-05	2.67315e-05	3.22876e-05	7.8574e-06
454	C7H15NO2H	146.118	0.00259253	0.00374753	0.00136831	0.00128526	0.000196448	3.75239e-05	0.00153793	0.00142393	0.00109014	0.000954751	0.027096	0.00874078	4.86836e-05	0.0319906	0.0139635	0.00283922	0.0538002	0.000127204	0.000236041	0.0253371	0	0.0119618	0.0162644	0.0180545	0.0126686	0.0147373	0.0029051	0.0191414	0.019109	4.04923e-05	2.94244e-05	3.49583e-05	7.82619e-06
455	C6H4Cl2H	146.976	3.42003e-05	0.000123915	6.47618e-05	2.26601e-05	0.000200451	0.000105862	9.19751e-05	6.61258e-05	7.59277e-05	6.46316e-05	0.132595	0.00111001	0.0165283	0.276036	0.0959058	0.152344	0.00121456	0.0331472	0.0060492	0.00351592	0.00970663	0.0500777	0.174762	0.0134703	0.00661128	0.0612303	0.0780556	0.0486024	0.0675568	0	7.61246e-05	3.80623e-05	5.38282e-05
456	C5H6O5H	147.029	4.30625e-05	0	5.7565e-05	1.46884e-05	0.000228727	2.8549e-05	6.20987e-05	8.4116e-05	5.82785e-05	7.48813e-05	0	0.000147911	0	0.00376244	0	0.000496463	0.00197977	0.000476323	6.29309e-05	0	0	4.93037e-05	0.00141963	0.000839673	0	0.000577153	0.000680789	0.000506353	0.000890835	0	0	0	0
457	C9H6O2H	147.044	0.00868462	0.0198712	0.00446214	0.00156356	3.23959e-05	0.000380205	0.00583235	0.00759854	0.00273527	0.00519675	1.31588	0.179039	0.00112836	0.404281	0.166177	0.0664524	0.461623	0.00785365	0.00286434	0.139749	0.00128364	0.498683	0.212303	0.157447	0.0705165	0.234737	0.185394	0.433684	0.545024	0.00276916	0.00314924	0.0029592	0.000268761
458	C6H10O4H	147.065	0.000504623	0.00206941	0.00208393	0.000649354	0.0001217	0.000159961	0.000931497	0.000909485	0.000825785	0.000737916	0.0880912	0.00670583	5.67337e-05	0.0418098	0.0152296	0.00764868	0.00481871	0.000588661	0.00115546	0.00210702	0.000328898	0.0316179	0.0215627	0.00218761	0.00121796	0.0141465	0.0149489	0.0241457	0.037095	0.000488797	0.000360071	0.000424434	9.10228e-05
459	C10H10OH	147.08	0.0894969	0.196653	0.0171405	0.018798	0.00166268	0.000750656	0.0540836	0.0771782	0.0231701	0.0510504	0.966844	0.212196	0.000919476	0.680039	0.194512	0.0481504	0.930197	0.00676852	0.00223876	0.332854	0.00202531	0.39332	0.307567	0.313068	0.16744	0.295349	0.0938479	0.453033	0.447546	0.00102851	0.000913626	0.00097107	8.12368e-05
460	C7H14O3H	147.102	0.0209119	0.0566038	0.019281	0.0124201	0.00235156	0.000567451	0.0186893	0.0203835	0.0125867	0.0131751	0.264687	0.08233	0.00147422	0.32551	0.150012	0.03632	0.26865	0.00396651	0.00225775	0.0274994	0	0.116164	0.170614	0.0916247	0.0137497	0.098038	0.0651701	0.132951	0.125575	0.000330839	0.00035625	0.000343544	1.79687e-05
461	C11H14H	147.117	0.609044	0.977768	0.291304	0.236383	0.0333269	0.00249266	0.358386	0.373677	0.223907	0.249455	3.40646	1.31885	0.0130608	4.29149	1.97263	0.401373	7.93067	0.00833143	0.0406113	3.63466	0.00156082	1.57946	2.22183	2.65987	1.81811	2.06982	0.474371	2.67033	2.74791	0.00048181	0.00156211	0.00102196	0.000763891
462	C8H18SH	147.12	0.347723	0.592394	0.167484	0.102114	0.011996	0.00176126	0.203912	0.228467	0.114603	0.155157	2.05058	0.622223	0.00685266	1.14419	0.720811	0.140269	3.6338	0.00829998	0.019126	1.24089	0.00123113	0.893218	0.668424	1.22041	0.621061	0.850778	0.273527	1.28543	1.34058	0.000529285	0.00124561	0.000887447	0.000506518
463	C8H18O2H	147.138	0.000377728	0.00624968	0.00640038	0.00253525	0.000605882	4.68351e-05	0.00270263	0.00293727	0.00269337	0.00226292	0.00800649	0.00750217	0.000361282	0.238747	0.0488783	0.0124249	0.0232989	0	3.9041e-05	0	0	0.00528998	0.100017	0.00777933	0	0.0282715	0.04794	0.0147211	0.0415542	6.30401e-05	3.89734e-05	5.10068e-05	1.70177e-05
464	C8H5NO2H	148.039	1.68679e-06	0	7.45883e-05	0.000198926	3.63914e-05	0.000127047	7.31065e-05	7.8148e-05	0.000124092	8.82025e-05	0.0163475	0.0024951	0.00929055	0.00432054	0	0	0.00949714	0	0.000476645	0	0	0.00937772	0.00144018	0.0033246	0	0.00353562	0.00412578	0.00653628	0.00708415	0	0	0	0
465	C5H9O4NH	148.06	4.62052e-05	0.000114685	0.000112026	9.06497e-05	5.62839e-06	2.9879e-05	6.65121e-05	4.56857e-05	7.19559e-05	3.92442e-05	0.00750846	0.0013966	0.00109611	0.00425351	0.000198777	0	0.00561231	0	5.60526e-05	2.58893e-05	0	0.00333372	0.0014841	0.00188945	1.29447e-05	0.00168005	0.00136579	0.00306906	0.00337881	1.46432e-05	4.88105e-06	9.7621e-06	6.90285e-06
466	C9H9NOH	148.076	0.00127116	0.00265346	0.000468204	0.000384975	2.69148e-05	2.03221e-05	0.000804172	0.00101441	0.00041788	0.000667042	0.0030818	0.000519134	3.42446e-05	0.00377488	0.000492675	0	0.00559613	3.77376e-05	0	0.00152272	0	0.00121173	0.00142252	0.00187796	0.000761359	0.00131839	0.000463903	0.00190387	0.00210503	3.2608e-05	1.59824e-05	2.42952e-05	1.1756e-05
467	C6H13NO3H	148.097	0.0018683	0.00377875	0.000703114	0.00099798	9.66999e-05	3.56284e-05	0.00124675	0.00141026	0.000804974	0.000902107	0.0100964	0.00376588	1.97353e-05	0.011495	0.00613853	0.00156972	0.0170409	0	0.000187985	0.00518473	0.000180223	0.00462732	0.00640108	0.00574296	0.00268248	0.00486346	0.00162791	0.00649823	0.00619424	5.48005e-05	3.48107e-05	4.48056e-05	1.4135e-05
468	C10H13NH	148.112	0.00383155	0.00715099	0.00251717	0.0019562	0.000416083	6.62049e-05	0.00265637	0.00260077	0.00182342	0.00172467	0.0280496	0.0108094	0.000218033	0.0325589	0.01667	0.00464178	0.0602926	3.96241e-05	0.00052423	0.0240711	0	0.0130257	0.0179569	0.0202855	0.0120355	0.0158259	0.00394281	0.0207689	0.0209684	4.2063e-05	3.58174e-05	3.89402e-05	4.41627e-06
469	C11H16	148.125	0.00681894	0.0102928	0.00423055	0.00305208	0.000788236	0.000125576	0.00421802	0.00383506	0.00291409	0.00261656	0.0237257	0.0124694	0.000207033	0.0308852	0.0108567	0.00382059	0.0650747	0	0.000690665	0.0355381	0.000155099	0.0121341	0.0151875	0.0219218	0.0178466	0.0167725	0.00415116	0.0213882	0.0223046	1.12915e-05	4.22047e-05	2.67481e-05	2.18589e-05
470	C8H4O3H	149.023	0.0133969	0.0220963	0	0.00119217	0	0.0149987	0.00861401	0.0094752	0.00422021	0.00801318	1.33446	0.446022	0.00261756	0.0645231	0.18461	0	0.495785	0	0	0	0.0334627	0.594366	0.0830443	0.165262	0.0167314	0.214851	0.260202	0.472556	0.573422	0	0.0154146	0.00770731	0.0108998
471	C4H5F5H	149.038	0.00233273	0.00475183	0.000582018	0.0017942	0.000422565	0.00159646	0.0019133	0.00157114	0.00146945	0.00103501	0.156364	0.0798719	0.00404531	0.0262329	0.036874	0.0160667	0.196201	0.00955052	0	0	0.00569928	0.0800936	0.0263912	0.0685837	0.00284964	0.0444795	0.0360999	0.0844263	0.0856839	0.000841233	0.00261861	0.00172992	0.0012568
472	C5H8O5H	149.044	0.000307748	0	0	0.00037261	0	8.96828e-05	0.00012834	0.000168975	0.000181448	0.000181624	0	0.0052486	0	0	0	0	0	0	0	0.00633309	0	0.00174953	0	0	0.00316654	0.00122902	0.00153253	0.00133016	0.00238093	0.000107506	3.58352e-05	7.16705e-05	5.06787e-05
473	C9H8O2H	149.06	0.0159088	0.0336309	0.00877838	0.00371782	0.000148648	0.000950938	0.0105226	0.0127404	0.00541729	0.0087145	1.37637	0.228654	0	0.389154	0.0726516	0.104516	0.649026	0.00917461	0	0.0784089	0	0.53501	0.188774	0.2194	0.0392045	0.245597	0.208385	0.479478	0.585284	0.00509734	0.00478219	0.00493976	0.000222839
474	C6H12O4H	149.081	0.00476928	0.00158005	0.000239964	0.00083369	7.07853e-05	4.11074e-05	0.00125581	0.00181876	0.00063162	0.00104538	0.0877148	0.00744798	0.000354784	0.0223759	0.00708923	0.00913161	0.0778787	0.00110195	0	0.044842	0	0.0318392	0.0128656	0.0263269	0.022421	0.0233632	0.00799403	0.0377292	0.0408513	0.00057372	0.00046963	0.000521675	7.36027e-05
475	C10H12OH	149.096	0.389312	0.891204	0.098895	0.120685	0.0113668	0.00074671	0.252035	0.343265	0.123835	0.22241	0.901386	0.356923	0.0012591	0.85592	0.423731	0.0871214	1.16644	0.00186343	0	0.267132	0	0.419856	0.455591	0.389435	0.133566	0.349612	0.146546	0.505563	0.470626	0.000253184	0.000253388	0.000253286	1.4364e-07
476	C11H16H	149.132	2.27736	3.45817	1.15887	0.719457	0.144672	0.0170585	1.29593	1.33795	0.776039	0.91737	3.19144	1.67139	0.0360746	4.67704	1.79447	0.478015	7.92566	0.0304775	0.0723112	3.39416	0.0425436	1.63297	2.31651	2.67615	1.71835	2.08599	0.497264	2.68229	2.70175	0.00195497	0.00503266	0.00349382	0.00217626
477	C4H7NO5H	150.04	0.000220581	0.000718253	5.94803e-05	0.000140888	3.14577e-05	5.91999e-05	0.000204977	0.000260895	0.000124183	0.000159958	0.0121577	0.00390052	0.000464592	0.00498709	0.00262922	0.000601707	0.00928907	9.22053e-05	2.81482e-05	0.00361231	0.000992764	0.00550761	0.00273934	0.00313647	0.00230254	0.00342149	0.00143184	0.00550336	0.0051173	4.07146e-05	7.82945e-05	5.95045e-05	2.6573e-05
478	C8H7NO2H	150.055	0.000295013	0.00139733	3.75602e-05	0.000125761	1.56993e-05	8.35556e-06	0.000313287	0.00054189	0.000136069	0.000332275	0.0551287	0.021933	1.5258e-05	0.0401725	0.0295321	0.00215027	0.0605235	0	0.000283895	0.0161648	0	0.0256923	0.0239516	0.0202691	0.0080824	0.0194989	0.00793966	0.0289351	0.0263542	4.22972e-05	3.37167e-05	3.80069e-05	6.06737e-06
479	C5H11NO4H	150.076	0.000474952	0.0012054	0.000299063	0.000382347	2.8161e-05	1.93848e-05	0.000401551	0.000435408	0.000295456	0.000274786	0.00820764	0.00276746	0	0.00698424	0.00360865	0.00121666	0.0134332	7.6222e-05	5.4961e-05	0.00480829	0	0.00365837	0.00393651	0.00452146	0.00240414	0.00363012	0.000892968	0.00509954	0.00495536	5.44471e-05	4.57199e-05	5.00835e-05	6.17108e-06
480	C9H11NOH	150.091	0.000521145	0.000341889	0.000598849	0.000369309	6.91229e-05	3.67817e-05	0.000322849	0.000229882	0.000318718	0.000198123	0.00201252	0.000321323	3.34573e-05	0.00338857	0.000871006	0.00031068	0.00707275	0	1.06139e-05	0.0023628	0	0.0007891	0.00152342	0.00236112	0.0011814	0.00146376	0.000669256	0.00190497	0.00246479	4.55874e-05	2.7397e-05	3.64922e-05	1.28626e-05
481	C10H15NH	150.128	7.9078e-05	0.000132585	0.000192119	0.000285308	0.000182634	8.45813e-05	0.000159384	7.77582e-05	0.000207574	9.00979e-05	0.00190687	0.00127976	0.000575394	0.00223515	0.00386611	0.002896	0.00908387	0.000294675	0.000785825	0.00430075	0.000244357	0.00125401	0.00299909	0.00338812	0.00227255	0.00247844	0.000938122	0.00267791	0.00296085	3.56927e-05	3.33901e-05	3.45414e-05	1.6282e-06
482	C3F6H	150.998	4.20727e-05	0.00021756	0.000119975	0.000213169	3.37704e-06	5.00651e-05	0.000107703	9.14939e-05	0.000132821	8.7311e-05	0	0	9.33575e-05	0	0	0	0.00311513	0	0.000238808	0	0	3.11192e-05	0	0.00111798	0	0.000287275	0.000553998	0.000507925	0.00114792	1.39946e-05	2.50912e-05	1.95429e-05	7.84645e-06
483	C4H6O6H	151.024	6.09769e-05	0	3.26872e-05	0.000125425	4.59957e-05	5.65888e-05	5.36123e-05	4.14496e-05	7.72275e-05	4.91599e-05	0.0021119	0.00165593	0.000229454	0.00309104	0	0.00139626	0.0015739	0.00280941	0.00110727	0.00132426	0	0.00133243	0.00149577	0.00183019	0.00066213	0.00133013	0.000491164	0.00161659	0.000878212	0.000239941	0.000124086	0.000182014	8.19215e-05
484	C8H6O3H	151.039	4.61507e-05	1.86361e-05	9.7249e-05	5.06444e-05	1.96323e-05	2.82667e-05	4.34299e-05	2.95531e-05	4.9722e-05	2.69492e-05	0.51874	0.0728179	0.000498214	0.154827	0.0901127	0.0475325	0.21319	0.00384797	0.0015944	0.0630443	0.0011762	0.197352	0.0974908	0.0728775	0.0321103	0.0999576	0.0703049	0.177543	0.214131	0.00130586	0.0014734	0.00138963	0.00011847
485	C5H10O5H	151.06	0.00015438	0.00045276	0.000243728	0.000220692	8.5214e-05	3.96827e-05	0.000199409	0.000146413	0.000184648	9.73311e-05	0.0354138	0.0089514	0.000254604	0.0175839	0.00698249	0.00549741	0.0275323	0.00173076	0.00101491	0.0139563	0.000966622	0.0148733	0.0100213	0.0100927	0.00746146	0.0106122	0.00309316	0.0160155	0.0147844	0.000140495	0.000176914	0.000158704	2.57522e-05
486	C9H10O2H	151.075	0.00987114	0.029926	0.00281022	0.00323778	0.000626123	0.00049191	0.0078272	0.0113528	0.00372835	0.00722394	0.541817	0.116278	0.000373223	0.285524	0.0641055	0.0157472	0.412306	0.00374687	0.000162861	0.107021	0	0.21949	0.121792	0.138739	0.0535103	0.133383	0.0682081	0.227225	0.239094	0.00118142	0.000924982	0.0010532	0.000181329
487	C6H14O4H	151.096	0.00100956	0.00195688	0.000471566	0.000435079	0.000124441	0.000155616	0.00069219	0.000696447	0.000436593	0.000454612	0.026751	0.00716402	0	0.00858829	0.00102614	0	0.0453996	0.00077231	0.000661401	0.0268589	0	0.011305	0.00320481	0.0156111	0.0134295	0.0108876	0.00541516	0.0166948	0.0173772	0.000233698	0.000177059	0.000205378	4.00501e-05
488	C10H14OH	151.112	0.00323162	0.0111236	0.00141327	0.000966741	0.000338474	0.000121889	0.00286594	0.00419425	0.00134944	0.00267561	0.402271	0.0771855	0.00130683	0.264291	0.0653317	0.0297825	0.462189	0.00411862	0.00054759	0.0897884	0	0.160254	0.119802	0.155618	0.0448942	0.120142	0.0533227	0.194552	0.205504	0.00145197	0.000888671	0.00117032	0.000398312
489	C11H18H	151.148	0.0505527	0.0593505	0.0315454	0.0227466	0.00281055	0.00283796	0.0283073	0.0236589	0.0207525	0.0165534	2.52849	1.05179	0.345923	2.29575	1.33689	0.920152	5.58301	0.277175	0.420744	2.13718	0.82966	1.30873	1.5176	2.09364	1.48342	1.60085	0.341028	2.02326	1.79316	0.00220565	0.00290274	0.00255419	0.000492917
490	C7H5NOSH	152.016	6.64508e-05	9.01307e-05	1.98332e-05	3.50848e-05	1.00502e-05	1.2703e-05	3.90421e-05	3.24968e-05	2.8264e-05	2.13112e-05	0.000591464	9.08037e-05	0.000205898	0.000786691	0.000276667	0.000245331	0.00409983	0	0.000260108	2.5355e-05	0.000223634	0.000296055	0.00043623	0.00145331	0.000124495	0.000577523	0.000597614	0.000872058	0.00144121	0	4.71607e-06	2.35804e-06	3.33477e-06
491	C7H5NO3H	152.034	2.62416e-05	1.08705e-05	8.65557e-06	1.98554e-06	8.06512e-06	6.27878e-06	1.03495e-05	8.336e-06	5.98962e-06	6.42143e-06	0.0165256	0.00125182	0.000401048	0.00496226	0.003191	0.000467876	0.00670885	0.000165598	0.000247487	0.000896839	0	0.0060595	0.00287371	0.00237398	0.00044842	0.0029389	0.00232838	0.00542319	0.00694064	1.72765e-06	8.13703e-06	4.93234e-06	4.53212e-06
492	C12H8	152.062	0.000338187	0.000639923	0.000215631	0.000191102	3.4299e-05	1.3714e-05	0.000238809	0.000230683	0.000168764	0.000151316	0.00626199	0.000703112	0.000255956	0.00532031	0.000963386	0.00031091	0.0132123	0	9.02463e-05	0.00211844	0.000234235	0.00240702	0.0021982	0.00443419	0.00117634	0.00255394	0.00136397	0.00399441	0.00487706	4.58513e-05	3.24272e-05	3.91392e-05	9.49226e-06
493	C8H9NO2H	152.071	0.000523966	0.00088908	0.000262586	0.000196358	3.31944e-05	2.10315e-05	0.000321036	0.000333368	0.000197712	0.000222982	0.00524399	0.00177236	0	0.00340686	0.000685869	0.000228745	0.00731828	0.000347117	1.98219e-05	0.000992426	0	0.00233878	0.00144049	0.00256174	0.000496213	0.00170931	0.000942822	0.00288984	0.00296095	5.61985e-05	2.94031e-05	4.28008e-05	1.89472e-05
494	C9H13NOH	152.107	0.00293527	0.00669013	0.00156647	0.00216111	5.53208e-05	2.70491e-05	0.00223922	0.00246645	0.00161951	0.00157734	0.00206159	0.000200766	0	0.00192441	0.0006778	0.000266593	0.00605259	0	4.15396e-05	0.0015687	0	0.000754118	0.000956268	0.00203138	0.000784349	0.00113153	0.00060647	0.00163686	0.00214264	6.57036e-05	2.69124e-05	4.6308e-05	2.74295e-05
495	C10H17NH	152.143	0.00193134	0.00287008	0.00150384	0.0012855	0.000147614	3.30109e-05	0.00129523	0.00108061	0.00104857	0.000762711	0.001742	0.00131329	0.000708538	0.00244666	0.00328362	0.00164149	0.00424703	0.00083495	0.000591573	0.00345244	0.00168461	0.00125461	0.00245725	0.00189118	0.00256853	0.00204289	0.000603433	0.00197823	0.00121059	5.58816e-06	1.06514e-05	8.1198e-06	3.58028e-06
496	C11H19H	152.156	0.000655057	0.00100305	0.000382757	0.000449153	8.62076e-05	3.99243e-05	0.000436025	0.000361046	0.000348273	0.000244274	0.00441624	0.00177876	0.00223413	0.00847356	0.0101862	0.0067721	0.0220813	0	0.00380174	0.0157812	0.00704603	0.00280971	0.00847728	0.0086277	0.0114136	0.00783207	0.0036102	0.00719492	0.00746392	0	2.24767e-05	1.12383e-05	1.58934e-05
497	CCl4H	152.883	0.00013855	0.000174828	1.07657e-05	8.65541e-06	8.61714e-06	0	5.69028e-05	7.82286e-05	1.90899e-05	5.5517e-05	0.00011626	0	0	0.000510971	0.000119396	0.000139597	0.00748091	0	0	0.000444957	0	3.87534e-05	0.000256655	0.00249364	0.000222479	0.00075288	0.00116444	0.00124847	0.00273808	0	0	0	0
498	C7H4O4H	153.018	1.20845e-05	0	0	0	3.97564e-05	2.89309e-05	1.3462e-05	1.71829e-05	1.09747e-05	1.62369e-05	0.00676288	0.000726553	0	1.93344e-05	0	0	0	0.000346602	0.00026103	0	0	0.00249648	6.44479e-06	0.000202544	0	0.000676366	0.00121704	0.00174421	0.00296197	0	2.00358e-05	1.00179e-05	1.41674e-05
499	C4H8O6H	153.039	1.6863e-05	0	6.4342e-06	1.24531e-07	2.55078e-06	5.67651e-06	5.27484e-06	6.28588e-06	3.05886e-06	4.24054e-06	0.00172267	0.000669193	0.000119812	0.00157964	0.000753876	0.000351568	0	0.000221698	7.72518e-05	0	0	0.000837225	0.000895029	9.965e-05	0	0.000457976	0.000473633	0.000618135	0.000705786	3.00518e-05	2.27984e-05	2.64251e-05	5.12894e-06
500	C8H8O3H	153.055	0.00092325	0.00212538	0.000820922	0.000504923	0.000139691	3.23934e-05	0.000757759	0.000758135	0.000521315	0.00050322	0.246198	0.0311814	9.67583e-05	0.045926	0.0149853	0.0157548	0.0967462	0.000964813	0.000194898	0.0136398	0	0.0924919	0.0255554	0.0326353	0.00681988	0.0393756	0.0370479	0.0802932	0.104628	0.00143798	0.000880676	0.00115933	0.000394076
501	C12H8H	153.07	0.0207475	0.0261507	0.00513771	0.00768815	0.000346304	9.3812e-05	0.0100274	0.0109239	0.00611597	0.0071947	0.126837	0.0301871	0.000136214	0.119904	0.0149981	0.00479112	0.30265	0.00060144	0.000705567	0.0479119	0.000261284	0.0523868	0.0465643	0.101319	0.0240866	0.0560892	0.0325286	0.089078	0.109393	0.00188128	0.000699209	0.00129024	0.000835848
502	C9H12SH	153.073	0.010221	0.00973399	0.00217917	0.00336806	0.000299996	0.000121628	0.00432064	0.00454773	0.00265745	0.00297429	0.0217388	0.0124515	0.000228795	0.0359193	0.0105598	0.00404706	0.147676	0.0016541	0.000243957	0.0511066	0	0.011473	0.0168421	0.049858	0.0255533	0.0259316	0.0169734	0.0352082	0.0511415	0.00112717	0.000415698	0.000771434	0.000503088
503	C9H12O2H	153.091	0.00726238	0.0177858	0.00316359	0.00289353	0.000348699	5.15985e-05	0.00525093	0.00666554	0.00291407	0.00427498	0.506213	0.0805277	0.000231469	0.173863	0.0509686	0.0367934	0.423933	0.00720016	0.00158503	0.0674703	0	0.195657	0.0872084	0.144239	0.0337351	0.11521	0.0700874	0.209244	0.234141	0.00387564	0.00247914	0.00317739	0.000987479
504	C10H16OH	153.127	0.00103732	0.00327461	0.00074038	0.00098806	0.000447756	0.000307758	0.00113265	0.00108825	0.000856542	0.000650084	0.590636	0.143133	0.000821187	0.480674	0.115452	0.0397959	0.976981	0.0057552	0.00186389	0.255705	0	0.244863	0.211974	0.3282	0.127853	0.228222	0.0828865	0.348688	0.371463	0.000934015	0.000758016	0.000846015	0.00012445
505	C11H20H	153.164	0.0215263	0.0360716	0.0161959	0.0136305	0.00301342	0.00138023	0.015303	0.0127948	0.0118342	0.0086716	1.1583	0.48615	0.0574337	1.18292	0.516322	0.264564	2.90021	0.0902038	0.0907748	0.659565	0.147929	0.567294	0.654601	1.02706	0.403747	0.663176	0.263934	0.927587	0.979001	0.00290195	0.00385935	0.00338065	0.000676984
506	C6H3O4NH	154.013	3.03207e-06	0	1.88069e-06	4.26358e-07	2.45758e-06	1.11155e-06	1.48471e-06	1.17994e-06	1.18281e-06	9.19111e-07	0.000120773	0	9.10958e-07	1.82307e-05	0	0	0.00179639	0	4.99112e-05	0.000177088	0.000104151	4.05613e-05	6.07689e-06	0.000615434	0.00014062	0.000200673	0.000282333	0.000331807	0.000648108	0	1.8196e-06	9.09802e-07	1.28665e-06
507	C7H5O4H	154.026	2.73018e-05	5.96677e-05	2.34817e-06	1.044e-08	2.44319e-06	4.45221e-07	1.53694e-05	2.40832e-05	4.4033e-06	1.68951e-05	0.00136203	0.000249044	2.959e-05	0.00245532	0.00343595	0.00107613	0.00312345	0	4.5749e-05	0.000946681	0.000195871	0.000546887	0.00232247	0.0010564	0.000571276	0.00112426	0.000832558	0.00108234	0.0011408	2.85317e-05	1.66474e-05	2.25896e-05	8.40344e-06
508	C7H7NO3H	154.05	0.000763588	0.00355083	0	0.00128479	4.08285e-05	1.83588e-05	0.000943065	0.00137898	0.000737874	0.000885642	0.419973	0.125166	0.00387253	0.207832	0.409032	0.0752855	0.146196	0	0.00762463	0.0821301	0	0.183004	0.230717	0.0512736	0.0410651	0.126515	0.0948893	0.163372	0.163988	4.67809e-06	2.38281e-05	1.42531e-05	1.35411e-05
509	C12H10	154.078	0.00259589	0.00578204	0.00128381	0.00105504	8.25483e-05	8.60507e-05	0.00181423	0.00215395	0.00105772	0.0013965	0.00640548	0.0032346	2.64254e-05	0.0104321	0.00613184	0.000644851	0.0131319	0.000374686	2.7395e-05	0.00298633	0	0.00322217	0.00573627	0.00451134	0.00149317	0.00374074	0.00181627	0.00478226	0.00459049	0.000115896	5.43369e-05	8.51165e-05	4.35289e-05
510	C8H11NO2H	154.086	4.19959e-05	5.96513e-05	8.79572e-05	9.84249e-05	2.44241e-05	1.82378e-05	5.51152e-05	3.30118e-05	6.91659e-05	3.69449e-05	0.00555183	0.000371432	0	0.00899136	0.000197689	0	0.0154345	0	1.13789e-06	0.00233878	0	0.00197442	0.00306302	0.00514521	0.00116939	0.00283801	0.00172278	0.00417887	0.00561251	7.39283e-05	3.70777e-05	5.5503e-05	2.60573e-05
511	C9H15NOH	154.123	4.27493e-05	0.000108747	5.13447e-05	3.7679e-05	1.04655e-05	3.84401e-06	4.24715e-05	3.7445e-05	3.42073e-05	2.47235e-05	0.00112304	0.000204841	0	0.00226014	0.000132936	0.000109955	0.00735658	0	7.93292e-05	0.0011098	0.000117444	0.000442628	0.000834344	0.00247864	0.000613624	0.00109231	0.000938025	0.00160178	0.00259117	5.27686e-05	2.49189e-05	3.88437e-05	1.96927e-05
512	C10H18O	154.135	8.67017e-05	0.000165432	6.48027e-05	0.000136245	1.0304e-05	1.48769e-05	7.97271e-05	6.2986e-05	8.42175e-05	5.59152e-05	0.00205986	0.000424661	3.38752e-05	0.00350538	0.00239141	0.000747751	0.00897545	0	6.68761e-05	0.00131594	1.64994e-05	0.000839465	0.00221485	0.00301411	0.000666221	0.00168366	0.00112548	0.00220932	0.00310522	1.29179e-05	6.09667e-06	9.50729e-06	4.82334e-06
513	C10H19NH	154.159	0.000566329	0.000327564	0.000235383	0.000890151	1.85609e-05	1.43242e-05	0.000342052	0.000338926	0.000460083	0.000405129	0.00182968	0.00220782	0.000163652	0.00264922	0.0101345	0.000853913	0.00420333	0.000263696	0.000324465	0.00138883	0.000375364	0.00140038	0.00454589	0.00159716	0.000882097	0.00210638	0.00165407	0.00195003	0.00179874	1.45145e-05	1.5849e-05	1.51817e-05	9.43653e-07
514	C11H21H	154.172	0.000422077	0.000657542	0.000251873	0.000351218	3.59382e-05	1.19975e-05	0.000288441	0.000244766	0.000247033	0.000173938	0.00167319	0.00065531	0.000326003	0.00392724	0.0047736	0.00159822	0.01877	0	0.000445068	0.00426244	0.000826465	0.000884835	0.00343302	0.00640503	0.00254445	0.00331683	0.00231384	0.00405873	0.00650499	4.65098e-05	4.07177e-05	4.36137e-05	4.09561e-06
515	C2ClF5H	154.968	2.8561e-05	3.83328e-05	2.03831e-06	1.6985e-06	6.9306e-06	5.33003e-06	1.38152e-05	1.56426e-05	5.58725e-06	1.18704e-05	0	0	1.62049e-05	4.1078e-05	4.0345e-05	0.000166803	0.0022262	0	0.000104355	0.000253057	0.000123205	5.40163e-06	8.27418e-05	0.000776852	0.000188131	0.000263282	0.000350475	0.000384543	0.000806871	0	1.79397e-06	8.96983e-07	1.26853e-06
516	C5H2N2O4H	155.009	0	0	4.6342e-06	3.81425e-07	1.32735e-05	1.67075e-05	5.83277e-06	7.38675e-06	5.6793e-06	6.50236e-06	0	0	6.63634e-06	0	0	0.000206687	0.00023087	0	0.000242349	0.000212884	0.000245707	2.21211e-06	6.88956e-05	0.000157739	0.000229296	0.000114536	9.9559e-05	8.17522e-05	0.000115134	2.18787e-05	2.08395e-05	2.13591e-05	7.34825e-07
517	C7H6O4H	155.034	1.02488e-07	0	3.77178e-06	3.33964e-07	2.56588e-05	3.63367e-05	1.1034e-05	1.58908e-05	1.04437e-05	1.41335e-05	0.017408	0.000463881	0.000237923	0.00173399	0.00344167	0.00231569	0	0	0.000205444	0.00138694	0.000654504	0.0060366	0.00249711	6.84812e-05	0.00102072	0.00240573	0.00261868	0.00441138	0.00742672	0	3.20134e-05	1.60067e-05	2.26369e-05
518	C6H6N2O3H	155.045	0.000274723	0.000307385	0	0	3.96661e-05	3.39024e-05	0.000109279	0.000142147	3.34403e-05	0.000107564	0.00862133	0.000710785	7.85934e-05	0.00145304	0.0017045	0.00164171	0.000468912	0.000864096	4.95696e-05	0	0	0.0031369	0.00159975	0.000460859	0	0.00129938	0.0013974	0.00239361	0.00360517	2.56274e-05	5.89234e-05	4.22754e-05	2.35438e-05
519	C8H10O3H	155.07	0.00224371	0.00281165	0.00177377	0.00151943	0.000341854	0.000328699	0.00150319	0.00100619	0.00128198	0.000727382	0.167244	0.0442772	0.00197712	0.0645644	0.071568	0.0246823	0.120937	0.00879067	0.00335317	0.0209155	0	0.071166	0.0536049	0.0443603	0.0104577	0.0448972	0.0255097	0.0716929	0.0703705	0.00178168	0.00104166	0.00141167	0.000523273
520	C12H10H	155.086	0.0368719	0.058129	0.0212458	0.0239094	0.00218394	0.000374521	0.0237858	0.0217803	0.0183367	0.0147047	0.377817	0.148202	0.00248871	0.493915	0.184543	0.0463327	0.758078	0.00186937	0.00357608	0.227641	0.00176226	0.176169	0.241597	0.254508	0.114702	0.196744	0.0645566	0.266041	0.268396	0.00348812	0.00131729	0.00240271	0.00153501
521	C9H14SH	155.089	0.0207818	0.0258588	0.00939379	0.0103766	0.00148282	0.000366434	0.0113767	0.0102199	0.00827708	0.00686447	0.0559913	0.0449767	0.00167696	0.0774626	0.0702511	0.0223669	0.282286	0.00267685	0.00416605	0.141091	0.00273118	0.034215	0.0566935	0.0963764	0.071911	0.064799	0.026133	0.0790527	0.0954995	0.00217657	0.000841008	0.00150879	0.000944382
522	C9H14O2H	155.107	0.000626788	0.000671153	0.000649684	0.000420429	0.000241915	0.000283803	0.000482295	0.000192652	0.000433001	0.000155641	0.520674	0.0892446	0.00045665	0.27116	0.0633769	0.0372596	0.63192	0.00660329	0.00220628	0.136161	0	0.203459	0.123932	0.213576	0.0680807	0.152262	0.0689677	0.254207	0.275415	0.00607982	0.00497747	0.00552864	0.00077948
523	C10H18OH	155.143	0.000886154	0.00408039	0.000289053	0.00063254	0.00113308	0.000548662	0.00126165	0.00141088	0.000794069	0.000889798	0.469751	0.136636	5.39778e-05	0.476583	0.120764	0.034418	0.946421	0.00443961	0.00122816	0.231836	0	0.202147	0.210588	0.317363	0.115918	0.211504	0.082525	0.312986	0.342627	0.000376712	0.000234355	0.000305534	0.000100661
524	C11H22H	155.179	0.0370659	0.0631309	0.0257982	0.0226754	0.00489799	0.00307976	0.026108	0.0222837	0.0197499	0.0148911	0.901548	0.392258	0.024882	0.966281	0.425385	0.159699	2.84995	0.0699645	0.055939	0.542582	0.0619709	0.439563	0.517122	0.991952	0.302277	0.562728	0.299621	0.814767	0.969584	0.00290678	0.00400273	0.00345476	0.000774948
525	C6H5NO4H	156.029	2.45468e-06	1.45791e-06	0	0	1.78498e-06	4.42121e-06	1.68646e-06	1.66248e-06	1.0981e-06	1.71144e-06	0.0223119	0.00220595	0.000402181	0.00275002	0.00539913	0.000546456	0	7.64634e-05	0.000301387	0.00120713	0.00022237	0.00830669	0.00289854	0.00012595	0.000714751	0.00301148	0.00372618	0.00588876	0.00950899	1.94096e-05	1.31816e-05	1.62956e-05	4.40381e-06
526	C5H5N3O3H	156.04	5.17365e-05	9.3685e-05	1.13477e-05	3.87254e-06	4.7207e-06	6.48879e-06	2.86419e-05	3.67139e-05	1.1313e-05	2.62389e-05	0.0101719	0.00211601	5.57347e-05	0.00376177	0.00236937	9.43716e-05	0.00350551	0.000502053	0.000287149	0.000520128	0	0.00411455	0.00207517	0.00143157	0.000260064	0.00197034	0.00161492	0.00354072	0.00413703	2.10646e-05	9.69492e-06	1.53798e-05	8.0396e-06
527	C7H9NO3H	156.066	0.000224125	0.000355443	9.24255e-05	7.26662e-05	1.85496e-05	8.74721e-06	0.000128659	0.000135274	7.54724e-05	9.09161e-05	0.0191765	0.00355685	0.000186043	0.00733576	0.00497098	0.00169699	0.00876245	0.000558694	0.000161562	0.00105788	0	0.0076398	0.00466791	0.0031609	0.000528938	0.00399939	0.0029691	0.00691505	0.00787967	0.000101008	6.9462e-05	8.52348e-05	2.2306e-05
528	C11H9NH	156.081	0.000829804	0.00138174	0.000411836	0.000390579	4.50799e-05	2.53746e-05	0.000514069	0.000517111	0.000342615	0.000340921	0.00877077	0.00469895	9.34981e-05	0.0111348	0.00273565	0.000771787	0.0242443	0.000586331	0.00019608	0.00546257	0.000144949	0.00452107	0.00488074	0.00834223	0.00280376	0.00513695	0.0023211	0.00748533	0.00830826	8.8983e-05	5.94072e-05	7.41951e-05	2.09133e-05
529	C12H12	156.093	0.00115532	0.00186301	0.000622606	0.00053506	5.10154e-05	3.2798e-05	0.000709967	0.000701261	0.000477762	0.000467087	0.0115033	0.00659203	2.96992e-05	0.0222235	0.00387186	0.000876428	0.0446298	0.000261021	0.000127798	0.008174	0	0.00604168	0.00899061	0.0150062	0.004087	0.00853138	0.00476395	0.012104	0.0153513	9.86409e-05	5.69862e-05	7.78135e-05	2.94543e-05
530	C8H13NO2H	156.102	0.000346056	0.000539516	0.000199298	0.000197401	2.43324e-05	2.28388e-05	0.000221574	0.000198022	0.000163909	0.000132173	0.00920095	0.00340755	3.40754e-05	0.0110123	0.0019041	0.000614985	0.0210888	0.000196796	0.000161122	0.00416697	0	0.00421419	0.00451045	0.00714891	0.00208349	0.00448926	0.00207666	0.0066933	0.00748883	0.000124868	6.547e-05	9.51689e-05	4.20005e-05
531	C9H17NOH	156.138	9.48373e-05	0.000126828	6.54909e-05	0.000132976	1.48369e-05	3.55464e-05	7.84192e-05	4.82438e-05	8.53602e-05	4.81564e-05	0.00209134	0.000862301	8.38726e-06	0.00348329	0.000813298	0.000348316	0.00504666	0	0.000105634	0.0013161	6.43885e-06	0.000987342	0.0015483	0.00171743	0.000661268	0.00122859	0.000490319	0.00163679	0.0017593	5.66078e-05	4.17959e-05	4.92018e-05	1.04736e-05
532	C10H20O	156.151	5.11021e-05	8.76797e-05	7.01225e-05	9.00327e-05	1.82282e-05	1.92019e-05	5.60612e-05	3.21436e-05	6.29189e-05	3.17019e-05	0.00152599	0.000798286	3.56183e-05	0.00174791	0.000802124	0.000265592	0.00389565	0.000173088	3.10365e-05	0.00133865	0	0.000786632	0.000938543	0.00136659	0.000669323	0.000940272	0.000304833	0.0012846	0.00131186	1.56765e-05	5.22551e-06	1.0451e-05	7.38999e-06
533	C10H21NH	156.175	0.00013989	0.000343653	0.000210379	0.000224353	6.00877e-05	3.56753e-05	0.000169006	0.000114686	0.000169989	8.7214e-05	0.00181069	0.00103305	0.000340549	0.00205879	0.00123549	0.00104604	0.00672601	0.000458489	0.000661278	0.0032059	0.000902246	0.00106143	0.00144677	0.00261526	0.00205407	0.00179438	0.000682967	0.00213364	0.00213353	1.80608e-05	2.38467e-05	2.09538e-05	4.09127e-06
534	C6H4O5H	157.013	0	0	5.25358e-06	1.12668e-05	1.10728e-05	4.87417e-05	1.27225e-05	1.83398e-05	1.50332e-05	1.49854e-05	0	0	0.00015199	0	0	0	0	0	5.46997e-05	0	0	5.06634e-05	0	1.82332e-05	0	1.72242e-05	2.38924e-05	1.39823e-05	4.09156e-05	0	0	0	0
535	C7H8O4H	157.05	4.6055e-05	3.06043e-05	0.000101241	0.00012813	2.15527e-05	0.000276077	0.00010061	9.55756e-05	0.000122535	7.97135e-05	0.00227267	0.000746571	0.000460584	0	0.00273077	0.00162051	0	0	0.000298816	0	0	0.00115994	0.00145042	9.96054e-05	0	0.000677493	0.000735557	0.000779323	0.000949496	0.000261937	9.62564e-05	0.000179097	0.000117154
536	C11H8OH	157.065	0.0118652	0.0188135	0.00107713	0.000399462	0.000350805	7.65681e-05	0.00543045	0.00799052	0.0016441	0.00566515	0.50568	0.132878	0.00174762	0.20942	0.114064	0.0244603	0.280654	0.0131399	0.00244892	0.039865	0	0.213435	0.115981	0.0987475	0.0199325	0.112024	0.0794922	0.197128	0.211076	0.000633401	0.00102902	0.000831212	0.000279747
537	C8H12O3H	157.086	0.000579881	0.00219684	0.000825459	0.000557055	0.000684964	0.000174071	0.000836379	0.00070091	0.000643386	0.000435613	0.150048	0.0297909	0.00113374	0.110284	0.0299652	0.0228857	0.0434322	0.0194286	0.00398217	0	0	0.0603242	0.0543783	0.022281	0	0.0342459	0.0282921	0.0532415	0.0599107	0.0020121	0.00165929	0.0018357	0.000249481
538	C12H12H	157.101	0.165761	0.2511	0.0679737	0.0605849	0.00424193	0.0012834	0.0918241	0.0982327	0.0558576	0.0654266	1.52222	0.767703	0.00219364	2.10567	0.549867	0.0976844	5.33988	0.0161795	0.0101815	0.877524	0.00244206	0.764037	0.917741	1.78875	0.439983	0.977627	0.576247	1.45608	1.84523	0.00122694	0.00112363	0.00117528	7.30524e-05
539	C9H16O2H	157.122	0.00428395	0.00794037	0.00339565	0.00277599	0.000476332	0.000193541	0.00317764	0.00283966	0.0024177	0.00190744	0.511916	0.151908	0.0007543	0.481606	0.101047	0.0316994	1.06586	0.00916445	0.00296979	0.36538	0.000253486	0.221526	0.204784	0.35933	0.182817	0.242114	0.0797354	0.353232	0.382001	0.00149814	0.00123599	0.00136707	0.000185373
540	C10H20OH	157.159	0.00240721	0.00871548	0.000925246	0.00139529	0.00254701	0.00107468	0.00284415	0.00295514	0.00179368	0.00191046	0.375606	0.162204	0.00520935	0.474984	0.146181	0.0412615	0.916213	0.00878632	0.00718975	0.187325	0.00519384	0.181006	0.220809	0.31073	0.0962592	0.202201	0.0890648	0.290213	0.31876	0.00204148	0.00234092	0.0021912	0.000211729
541	C11H24H	157.195	0	2.66361e-06	3.24368e-05	1.92278e-05	5.98701e-05	2.72171e-05	2.35692e-05	2.2005e-05	2.79421e-05	1.62792e-05	0.000942867	0.00126368	3.96007e-06	0.00771984	0.00274663	0.00107223	0.00421906	0.00016364	3.50755e-05	0	0	0.000736835	0.00384623	0.00147259	0	0.00151392	0.00166705	0.00140909	0.00177572	1.25923e-05	1.75854e-05	1.50889e-05	3.53071e-06
542	C5H3NO5H	158.008	2.70907e-05	4.03017e-05	4.25282e-06	1.45239e-06	4.53683e-06	3.86507e-06	1.35833e-05	1.61668e-05	5.35395e-06	1.20001e-05	0.000315745	1.20137e-05	0.00010714	1.54932e-07	0.00022114	0.000149773	0	0	9.11849e-06	0.000147673	0.000137628	0.000144966	0.000123689	3.0395e-06	0.00014265	0.000103586	6.77054e-05	0.000108874	0.000126901	0	2.68702e-06	1.34351e-06	1.90001e-06
543	C6H7NO4H	158.045	5.22406e-05	7.40037e-05	1.96971e-05	3.28623e-06	5.9578e-06	8.26047e-06	2.7241e-05	2.91743e-05	1.22529e-05	2.23057e-05	0.00892894	0.00114878	0.000504545	0.00145584	0.00564622	0.00353616	0.0026546	3.97362e-06	0.000441551	0.000503683	0.000348321	0.00352742	0.00354607	0.00103338	0.000426002	0.00213322	0.00163953	0.00299421	0.00352943	1.34783e-05	7.84396e-06	1.06611e-05	3.98406e-06
544	C10H7ONH	158.06	0.000225749	0.000461819	6.29553e-05	6.14669e-05	8.71199e-06	1.49871e-05	0.000139282	0.00017657	6.93637e-05	0.000116673	0.00652951	0.00138469	7.39416e-05	0.0031491	0.000896566	0.000272814	0.00267826	0.00026265	0.00020366	0.000632994	0.000178871	0.00266271	0.00143949	0.00104819	0.000405933	0.00138908	0.000949995	0.00238205	0.00263763	1.82593e-05	1.3395e-05	1.58271e-05	3.43957e-06
545	C7H11NO3H	158.081	0.000525059	0.00106125	0.000332737	0.00027987	2.48465e-05	2.47028e-05	0.000374744	0.000387197	0.000253661	0.000252773	0.0121613	0.00316934	8.93121e-05	0.0100066	0.00130508	0.000461385	0.015391	0.000520781	0	0.000798609	0	0.00513998	0.00392436	0.00530394	0.000399304	0.00369189	0.00227968	0.00621382	0.00661655	0.00012566	5.25127e-05	8.90862e-05	5.17227e-05
546	C11H11NH	158.096	0.000543186	0.0013136	0.000447008	0.000477368	4.32471e-05	7.02818e-05	0.000482449	0.000460124	0.000381208	0.000295801	0.00730975	0.00273045	0.000118238	0.00882348	0.00235459	0.000637861	0.0147309	0.000620087	0.000150767	0.00432552	0	0.00338615	0.00393864	0.00516724	0.00216276	0.0036637	0.00124714	0.00515497	0.00519001	0.000187063	7.29667e-05	0.000130015	8.06786e-05
547	C8H15NO2H	158.118	8.32295e-05	0.000198585	0.000134351	0.000173205	2.74466e-05	3.73495e-05	0.000109028	7.10485e-05	0.000120718	6.38428e-05	0.00554484	0.00162312	4.89909e-05	0.0045783	0.00163268	0.000642241	0.00835805	0.000288682	0.000230178	0.00330795	0.000397471	0.00240565	0.0022844	0.00295897	0.00185271	0.00237543	0.000455687	0.00333934	0.00311336	7.45363e-05	4.92656e-05	6.1901e-05	1.7869e-05
548	C9H19NOH	158.154	0.00314444	0.000791804	0.000211063	0.000362777	5.24579e-05	9.69633e-05	0.000776585	0.00119032	0.000347543	0.000674128	0.00258851	0.00189857	0.000450175	0.00370244	0.00387327	0.000303887	0.00482953	0	0	0.0912186	0	0.00164575	0.00262653	0.00160984	0.0456093	0.0128729	0.0218294	0.00784257	0.0226102	0.000104053	0.000273913	0.000188983	0.000120109
549	C6H6SO3H	159.011	2.6605e-05	5.62554e-05	3.80655e-06	0	1.50239e-05	2.15502e-05	2.05402e-05	2.02273e-05	9.70739e-06	1.72091e-05	0.000162732	2.50024e-05	0.00016042	0.000189147	0.000286519	0.000100169	0.00223255	0	0	0	5.2727e-05	0.000116051	0.000191945	0.000744182	2.63635e-05	0.000269635	0.000323522	0.000420539	0.000799795	0	1.08409e-05	5.42043e-06	7.66565e-06
550	C6H6O5H	159.029	0.000157954	0.000185826	3.34369e-05	5.30618e-06	0	5.36112e-07	6.38431e-05	8.50545e-05	2.18252e-05	6.17827e-05	0.000106008	0.000380653	0	0.00403482	0.00217013	0.00185237	0.00430594	0.000501211	0.000128467	0.00186772	0	0.00016222	0.00268578	0.0016452	0.000933861	0.00135677	0.0010732	0.00113199	0.00159869	7.15049e-06	5.06721e-05	2.89113e-05	3.07744e-05
551	C10H6O2H	159.044	0.00130464	0.00342352	0.000283146	0.000128719	2.03543e-05	4.61899e-05	0.000867762	0.00134193	0.000312265	0.000901278	0.496498	0.0850756	0.000680856	0.158852	0.0980191	0.026924	0.194228	0	0.00112268	0.038036	9.5768e-05	0.194085	0.0945983	0.065117	0.0190659	0.0932165	0.0740815	0.169505	0.205523	9.13444e-05	0.000788527	0.000439936	0.000492982
552	C7H10O4H	159.065	0.000232092	0.000471698	0.000270377	0.000149256	0.00020607	7.49254e-05	0.00023407	0.000134977	0.000186679	9.94194e-05	0.0430945	0.00989816	0.000765067	0.0240987	0.0130861	0.0068127	0.0171765	0.00425217	0.00186409	0.00316527	0.000109689	0.0179192	0.0146658	0.00776426	0.00163748	0.0104967	0.007267	0.0162769	0.0168643	0.000667297	0.000475395	0.000571346	0.000135695
553	C11H10OH	159.08	0.0186914	0.0263886	0.00379078	0.00263909	0.000368966	7.68307e-05	0.00865928	0.0111113	0.00366276	0.00768722	0.689219	0.147644	0.000482157	0.398285	0.110311	0.0376348	0.545209	0.00826885	0.0026723	0.139143	0.000555268	0.279115	0.182077	0.185383	0.0698493	0.179106	0.0856097	0.294799	0.304436	0.000610297	0.000865173	0.000737735	0.000180225
554	C8H14O3H	159.102	0.000599219	0.00157223	0.000723768	0.000584881	0.000156519	0.000164792	0.000633569	0.000517708	0.000525184	0.000333704	0.0501973	0.0107662	0.000681409	0.0603209	0.01449	0.00785449	0.0374133	0.00242509	0.00088149	0.0215562	0.0013443	0.0205483	0.0275551	0.0135733	0.0114502	0.0182817	0.00730232	0.0233103	0.0210282	0.0020744	0.00131009	0.00169225	0.000540449
555	C12H14H	159.117	0.038223	0.0905011	0.0181891	0.0196026	0.00144052	0.000505339	0.0280769	0.0335827	0.0173251	0.0213238	0.880068	0.239336	0.000728855	0.771809	0.158683	0.0572981	1.59805	0.00662572	0.00655066	0.463128	0	0.373377	0.329263	0.537074	0.231564	0.36782	0.12745	0.552963	0.591269	0.000775223	0.000956179	0.000865701	0.000127955
556	C9H18O2H	159.138	4.22416e-05	0.000653089	0.000553825	0.000745157	0.000233016	0.000355584	0.000430486	0.000268	0.000544067	0.00024214	0.0834064	0.0545653	0.000921969	0.0693985	0	0	0.110762	0.000525328	0	0.0448129	0	0.0462979	0.0231328	0.0370956	0.0224064	0.0322332	0.0115591	0.0511921	0.0453696	8.12553e-05	0.00035335	0.000217303	0.0001924
557	C10H22OH	159.174	0	0	5.13733e-06	5.42867e-06	4.19718e-06	8.86106e-06	3.93737e-06	3.43453e-06	5.30591e-06	2.47767e-06	0	0	0	0.000389409	0	0	0.00834235	0	0	0	0.000305797	0	0.000129803	0.00278078	0.000152898	0.000765871	0.00134496	0.00134206	0.00307702	1.92544e-05	6.41815e-06	1.28363e-05	9.07663e-06
558	C5H5NO5H	160.024	0.0001102	0.000146215	0	4.58543e-07	1.68224e-06	1.51355e-06	4.3345e-05	6.67167e-05	1.05743e-05	4.78472e-05	0.000987455	7.25269e-05	7.65361e-05	0.000830278	0.00028529	0.000241084	0.00206527	0	0.000249681	0	0	0.000378839	0.000452217	0.00077165	0	0.000400677	0.00031691	0.000614883	0.000767325	0	0.00011153	5.57649e-05	7.88635e-05
559	C9H5NO2H	160.039	7.54564e-05	0.00014773	8.90966e-06	1.91497e-05	2.25907e-06	8.25251e-06	4.36263e-05	5.76501e-05	2.0376e-05	3.82181e-05	0.00919195	0.00102925	0.000227071	0.00292518	0.000843417	0.000367074	0.00424078	1.62097e-05	0.000195715	0.000434498	0.000195383	0.00348276	0.00137856	0.00148424	0.00031494	0.00166512	0.00132182	0.00314346	0.00388688	0	2.96869e-05	1.48435e-05	2.09918e-05
560	C6H9NO4H	160.06	3.25927e-05	9.98198e-05	5.59405e-05	4.98761e-05	6.91408e-06	1.86294e-05	4.39621e-05	3.29912e-05	4.12981e-05	2.23106e-05	0.0105033	0.00106647	0.000238592	0.00411542	0.000911718	0.000579126	0.00546381	0	0.000179762	0.00139009	0.000195673	0.00393612	0.00186876	0.00188119	0.000792881	0.00211974	0.00131399	0.00374191	0.00443045	2.92296e-05	2.55473e-05	2.73885e-05	2.60382e-06
561	C10H9ONH	160.076	0.000149865	0.000268824	8.24821e-05	3.65249e-05	1.11692e-05	1.69044e-05	9.42949e-05	9.99246e-05	5.22076e-05	7.00094e-05	0.00267188	0.000983101	3.95431e-05	0.00181371	0.000629682	0	0.00351829	0.000193371	0	0.000236224	0	0.00123151	0.000814465	0.00123722	0.000118112	0.000850326	0.000526754	0.00144755	0.00146011	1.99587e-05	1.31777e-05	1.65682e-05	4.79486e-06
562	C9H9N3H	160.087	0.000258412	0.000459508	0.000102118	5.81352e-05	6.27668e-06	2.61436e-05	0.000151766	0.000175646	7.76511e-05	0.000120449	0.00317664	0.000799032	9.71462e-05	0.000886703	0.000753716	0.000240876	0.00131745	0.000109554	0.000121655	0.000367018	0.000570403	0.00135761	0.000627098	0.000516221	0.00046871	0.000742409	0.000415467	0.00121415	0.00123818	2.3142e-05	4.03092e-05	3.17256e-05	1.2139e-05
563	C7H13NO3H	160.097	0.000296973	0.000591761	0.000238254	0.000266576	3.4699e-05	4.28347e-05	0.000245183	0.000204231	0.000206319	0.000137333	0.00259789	0.00017521	0	0.000257537	0.000366745	0.000554146	0.00400027	0	1.99168e-05	0.000437007	0	0.000924365	0.00039281	0.00134006	0.000218504	0.000718935	0.000511465	0.00130848	0.00165293	5.13654e-05	2.71828e-05	3.92741e-05	1.70997e-05
564	C11H13NH	160.112	0.00325261	0.00593216	0.00200553	0.00116487	7.70608e-05	1.75819e-05	0.00207497	0.00225044	0.00125727	0.00152798	0.0211291	0.0074297	4.07107e-05	0.0311358	0.013828	0.0019581	0.0433243	0.000226388	0.000215125	0.017724	0	0.00953317	0.0156406	0.0145886	0.00886198	0.0121561	0.00345398	0.0153693	0.0152773	2.37851e-05	1.99294e-05	2.18573e-05	2.72641e-06
565	C8H17NO2H	160.133	0.000616083	0.00100669	0.000378587	0.000328999	4.71151e-05	1.35317e-05	0.000398501	0.000372596	0.000285288	0.000249335	0.0317527	0.0097816	2.70026e-05	0.0420468	0.0143527	0.00270968	0.0722684	0	0.0003033	0.0304728	0	0.0138538	0.0197031	0.0241906	0.0152364	0.018246	0.00468367	0.0239082	0.0253878	3.68368e-05	2.28332e-05	2.9835e-05	9.9021e-06
566	C6Cl2H2OH	160.956	2.87513e-05	2.88935e-05	3.02296e-05	4.09713e-05	5.00816e-05	4.3884e-05	3.71352e-05	9.09694e-06	3.98671e-05	7.31163e-06	0	0	3.26624e-05	0	0	0	0.00148366	0	0	0.000785589	0.00056234	1.08875e-05	0	0.000494552	0.000673965	0.000294851	0.00034214	0.000325778	0.000550226	1.7379e-05	1.48439e-05	1.61114e-05	1.79257e-06
567	C3F4O3H	160.986	1.69799e-05	2.75414e-05	2.26808e-05	4.39184e-05	3.10614e-05	3.08191e-05	2.88335e-05	9.12683e-06	3.43067e-05	1.04694e-05	0	0	0.000107458	0	0	0	0	0	0	0	0	3.58194e-05	0	0	0	8.95484e-06	1.79097e-05	7.9519e-06	2.81473e-05	7.28174e-06	9.80345e-06	8.5426e-06	1.78312e-06
568	C6H5O3ClH	161	3.2023e-07	7.63142e-07	2.39144e-06	1.48641e-05	5.67956e-07	1.3002e-05	5.31815e-06	6.73831e-06	8.91451e-06	7.39293e-06	0	0	1.27105e-06	0	0	0	0	0	0	0	0	4.23683e-07	0	0	0	1.05921e-07	2.11842e-07	9.40577e-08	3.32935e-07	2.43458e-06	2.23738e-06	2.33598e-06	1.39446e-07
569	C6H8O5H	161.044	0.000116826	0.000110051	0.000122994	0.000121521	8.82484e-06	2.02255e-05	8.34071e-05	5.36675e-05	8.80838e-05	4.95815e-05	0	0.000163368	2.59575e-05	0	0	0.000816478	0.000306309	8.37281e-05	0.000361778	0.00370114	0	6.31083e-05	0.000272159	0.000250605	0.00185057	0.000609111	0.000832948	0.000354576	0.000928598	5.72209e-05	4.53568e-05	5.12889e-05	8.38921e-06
570	C10H8O2H	161.06	0.00146755	0.00485292	0.0030478	0.00204022	7.01983e-05	0.000392982	0.00197861	0.0017791	0.00178319	0.00124527	0.782567	0.105098	0.00106725	0.184562	0.0168862	0.0411217	0.260147	0.0116832	0.00183847	0.0320274	0.000392082	0.296244	0.0808565	0.091223	0.0162097	0.121133	0.121367	0.249588	0.330591	0.00376368	0.00290508	0.00333438	0.000607127
571	C7H12O4H	161.081	0.000594525	0.00185165	0.000897959	0.000527951	0.000125394	0.00013103	0.000688085	0.000641756	0.000536667	0.00042114	0.0672786	0.0101812	0.000213293	0.0336213	0.00970606	0.00902358	0.018918	0.00229086	0.00153424	0.00325215	0	0.0258911	0.0174503	0.00758105	0.00162608	0.0131371	0.0107182	0.0221059	0.0273421	0.000481931	0.000345301	0.000413616	9.66122e-05
572	C11H12OH	161.096	0.0170002	0.0370683	0.00298293	0.00283549	0.00031404	0.000167303	0.0100614	0.0146475	0.00402727	0.00978932	0.507116	0.108831	0.000990282	0.315267	0.0705433	0.0199262	0.52183	0.00675792	0.000176085	0.166663	5.1828e-05	0.205646	0.135246	0.176255	0.0833575	0.150126	0.0530554	0.240398	0.243506	0.00038065	0.000431252	0.000405951	3.57811e-05
573	C8H16O3H	161.117	0.00945952	0.0208799	0.00721901	0.00563228	0.00108058	0.000329771	0.0074335	0.00747024	0.00521383	0.00486612	0.399576	0.140892	0.00184791	0.47769	0.207269	0.0567523	0.536809	0.0104568	0.00600078	0.0463986	0.00202259	0.180772	0.247237	0.184422	0.0242106	0.15916	0.0949986	0.224522	0.216744	0.00033256	0.000381635	0.000357097	3.47016e-05
574	C12H16H	161.132	0.146324	0.230138	0.064107	0.0527647	0.00585256	0.00071427	0.0833167	0.0890536	0.0504299	0.0594778	3.49394	1.30845	0.00723303	5.2585	1.90113	0.356638	9.0029	0.0142554	0.0408321	4.03892	0.00242708	1.60321	2.50542	3.01933	2.02067	2.28716	0.611695	2.90878	3.11216	0.000405021	0.000859386	0.000632203	0.000321284
575	C9H20SH	161.136	0.070062	0.128056	0.0396845	0.0270975	0.0031746	0.000589785	0.0447774	0.0481591	0.0275422	0.0322203	2.79697	0.837854	0.0070729	1.41018	0.808513	0.170463	5.62494	0.0127333	0.0300942	1.3723	0.00225213	1.21397	0.796386	1.88926	0.687278	1.14672	0.544581	1.82755	2.05277	0.000397312	0.000979941	0.000688627	0.000411981
576	C9H20O2H	161.154	6.69814e-05	0.000142965	0.00054412	0.000476799	0.000250542	8.73854e-05	0.000261466	0.000204231	0.000367219	0.000203552	0.0155063	0.0207633	0.000821874	0.376371	0.0695996	0.0165355	0.0158592	5.28509e-05	0.000353626	0	0.000272025	0.0123638	0.154169	0.00542188	0.000136012	0.0430226	0.0742663	0.0220276	0.0648188	0.000753936	0.000853902	0.000803919	7.06865e-05
577	C6Cl2H3OH	161.963	4.69444e-05	6.81564e-05	3.54443e-05	2.76712e-05	4.78406e-05	3.30414e-05	4.31831e-05	1.45799e-05	3.55018e-05	1.27056e-05	2.25552e-06	0	6.24138e-05	0.000194881	0.000100567	0.000101288	0.00288469	0	6.62157e-05	0.000638821	0.000175032	2.15564e-05	0.000132245	0.000983636	0.000406927	0.000386091	0.000430045	0.000523703	0.00104005	3.95316e-06	9.99876e-06	6.97596e-06	4.27488e-06
578	C5H7NO5H	162.04	1.6494e-05	1.94404e-05	2.77415e-05	3.61951e-05	6.50265e-06	1.67137e-05	2.05146e-05	1.02587e-05	2.56381e-05	1.21481e-05	0.0304313	0.00289657	0.000207544	0.00836982	0.00447728	0	0.0080738	2.28413e-05	0.000379367	0.00230368	0.000704121	0.0111785	0.00428237	0.00282534	0.0015039	0.00494752	0.00430618	0.00937305	0.0126549	4.73592e-05	5.17119e-05	4.95356e-05	3.07782e-06
579	C9H7NO2H	162.055	3.2387e-05	3.09338e-05	4.96264e-05	5.4432e-05	6.77283e-06	2.65555e-05	3.34513e-05	1.71382e-05	4.01251e-05	1.8833e-05	0.00567869	0.00256485	0.00424209	0.00442136	0	0	0.00886986	8.85313e-05	1.36492e-05	0	0	0.00416188	0.00147379	0.00299068	0	0.00215659	0.00181052	0.00360213	0.00345638	0	0	0	0
580	C6H11NO4H	162.076	9.11939e-05	0.000280452	0.000134743	7.85912e-05	9.63709e-06	2.66474e-05	0.000103544	9.77511e-05	8.00993e-05	6.43388e-05	0.00916543	0.00117949	0.000332792	0.00440519	0	0	0.00593992	0.000229443	1.17107e-06	0.000112377	0	0.00355924	0.0014684	0.00205685	5.61883e-05	0.00178517	0.00145038	0.00343883	0.00408114	8.33257e-05	3.41262e-05	5.8726e-05	3.47893e-05
581	C10H11NOH	162.091	0.000553842	0.000956721	0.000231594	0.000102885	1.20056e-05	8.20562e-06	0.000310876	0.000375933	0.000150751	0.000260924	0.00226893	0.000639492	2.65664e-05	0.00269746	0.000711451	0.000163974	0.00376686	0	8.04134e-05	0.00126983	0.000272973	0.000978331	0.00119096	0.00128242	0.0007714	0.00105578	0.000228408	0.00142772	0.00138345	2.18661e-05	1.39836e-05	1.79249e-05	5.57376e-06
582	C7H15NO3H	162.112	0.00052686	0.00113794	0.000329171	0.000260269	3.44236e-05	8.28922e-06	0.000382826	0.000417255	0.000247099	0.00027137	0.012913	0.00474564	6.69738e-06	0.0171049	0.0060324	0.00179499	0.0277152	4.36362e-05	0.000142364	0.00922911	0	0.00588844	0.00831077	0.00930039	0.00461456	0.00702854	0.00215504	0.00940517	0.00973686	6.55143e-05	4.36955e-05	5.46049e-05	1.54282e-05
583	C11H15NH	162.128	0.00100796	0.0020107	0.000685394	0.000595643	9.33662e-05	1.75347e-05	0.000735099	0.000728045	0.000521913	0.000476834	0.0386342	0.014225	0.000134948	0.0348046	0.019835	0.00496535	0.076581	0.000278316	0.000710956	0.0198484	6.44669e-05	0.0176647	0.0198683	0.0258567	0.00995645	0.0183366	0.00657209	0.026266	0.0272464	2.79731e-05	3.06369e-05	2.9305e-05	1.88356e-06
584	C12H18	162.14	0.00115553	0.00193582	0.000642339	0.00057954	0.000105881	2.17516e-05	0.000740143	0.000714972	0.000510488	0.000473486	0.0195158	0.00864301	0.000225791	0.010424	0.0101924	0.00321147	0.0526072	0.000382586	0.00074221	0.0224442	0.000279268	0.00946155	0.00794262	0.0179107	0.0113617	0.0116691	0.00438981	0.0164028	0.0180867	2.15947e-05	2.23437e-05	2.19692e-05	5.29616e-07
585	C6Cl2H4OH	162.971	6.25916e-05	9.38491e-05	7.5312e-05	9.73173e-05	0.000124885	7.48628e-05	8.81363e-05	2.21838e-05	9.27065e-05	1.80042e-05	0	1.40431e-05	0.000577203	0	0.00014817	0.000427307	0	0.0013354	0.00075023	0.000861513	0.00106648	0.000197082	0.000191826	0.000695209	0.000963998	0.000512029	0.000382776	0.000379352	0.000518386	6.15035e-05	6.23454e-05	6.19245e-05	5.95284e-07
586	C9H6O3H	163.039	0.00252402	0.0109581	0.00554556	0.0124345	0.00224124	0.005909	0.00660206	0.00424819	0.0081719	0.00436297	1.11525	0.441271	0.0166953	0.257548	0.306912	0.0438549	0.516587	0.0211826	0.0131396	0.0702013	0.00559401	0.524406	0.202771	0.183636	0.0378977	0.237178	0.205153	0.439676	0.464038	0.000565773	0.00099946	0.000782617	0.000306663
587	C6H10O5H	163.06	0.000537246	0.000860944	0.00083313	0.00171004	0.000188702	0.000574378	0.000784074	0.0005148	0.00105865	0.000654609	0.116024	0.0652321	0.000602651	0.0411755	0.0197965	0.00715232	0.113161	0.00414764	0.0016103	0.0281552	0.000347034	0.0606194	0.0227081	0.0396396	0.0142511	0.0343046	0.020474	0.0601092	0.0550251	0.000321471	0.000223922	0.000272697	6.89775e-05
588	C10H10O2H	163.075	0.000373685	0.00378693	0.00263282	0.00111822	7.75168e-05	0.000312256	0.00138357	0.00150203	0.00121995	0.00102927	0.79205	0.130489	0.000583064	0.220017	0.0216907	0.0704275	0.397422	0.0164607	0.000928323	0.0201159	0	0.307707	0.104045	0.13827	0.0100579	0.14002	0.12424	0.278822	0.340127	0.00202973	0.00260096	0.00231535	0.00040392
589	C7H14O4H	163.096	0.00136046	0.00158883	0.000304728	0.000413307	0.000120362	0.000172874	0.000660093	0.000643264	0.000391475	0.000430369	0.0871372	0.0145573	0.000529884	0.0191651	0.00565804	0.00834296	0.12441	0.00509156	0.0015421	0.0531944	0	0.0340748	0.0110554	0.0436811	0.0265972	0.0288521	0.0137718	0.0471246	0.0503287	0.000514448	0.000401106	0.000457777	8.01449e-05
590	C11H14OH	163.112	0.0372746	0.08724	0.00939232	0.00898636	0.00164644	0.000383182	0.0241538	0.0336797	0.0109708	0.0221182	0.364805	0.138793	0.000627463	0.370729	0.143156	0.0312761	0.45655	0.00579472	0.00358397	0.087115	0.000570927	0.168075	0.18172	0.15531	0.043843	0.137237	0.0631897	0.200666	0.18815	0.000978647	0.000880239	0.000929443	6.95849e-05
591	C8H18O3H	163.133	0.00159365	0.00432272	0.0029812	0.00153139	0.00204989	0.00086931	0.00222469	0.00124262	0.0019136	0.000901203	0.00101949	0.0140466	0.00155576	0.114354	0.0439227	0.0159403	0.000575025	0.00736168	0.000927677	0	0.00206684	0.00554061	0.0580723	0.00295479	0.00103342	0.0169003	0.0275101	0.00827783	0.0214125	0.000446657	0.000189679	0.000318168	0.000181711
592	C12H18H	163.148	0.322316	0.499489	0.17718	0.107422	0.0191376	0.00221655	0.18796	0.192201	0.114941	0.13199	2.95596	1.1946	0.039082	3.59758	1.75914	0.438642	7.28255	0.0384208	0.0793396	2.56459	0.0605153	1.39655	1.93179	2.46677	1.31255	1.77691	0.535473	2.36099	2.49443	0.00100774	0.00178643	0.00139709	0.000550616
593	C9H9O2NH	164.071	0.000302591	0.00110928	0.00010551	0.000156579	3.87479e-05	2.80712e-05	0.00029013	0.000413511	0.000156018	0.000254292	0.030514	0.00965195	4.48002e-06	0.0206665	0.00964021	0.00152918	0.0357182	0	0.00032471	0.00631674	0	0.0133901	0.010612	0.0120143	0.00315837	0.00979369	0.00456664	0.0155772	0.0154632	7.90547e-05	5.53893e-05	6.7222e-05	1.6734e-05
594	C6H13NO4H	164.092	9.17699e-05	0.000429951	0.000148695	0.000120421	2.57583e-05	1.85659e-05	0.000139194	0.000151427	0.000108529	9.09668e-05	0.00443688	0.000501342	7.88015e-05	0.00312456	0.00126484	0.000292588	0.00691322	0	0	0.00194459	0.000199278	0.00167234	0.00156066	0.00230441	0.00107194	0.00165234	0.000506907	0.00246216	0.00269199	1.86775e-05	1.71324e-05	1.79049e-05	1.0926e-06
595	C10H13NOH	164.107	0.000297175	0.000677687	0.000261741	0.000220425	2.45587e-05	4.0232e-05	0.000253636	0.000237024	0.000193094	0.000154188	0.00228812	0.000206468	5.23807e-06	0.00268418	0.000923402	0.000450092	0.00849779	0	0	0.00190194	0	0.000833277	0.00135256	0.0028326	0.00095097	0.00149235	0.000920738	0.00212238	0.00298398	6.40059e-06	2.13353e-06	4.26706e-06	3.01727e-06
596	C11H17NH	164.143	0.000186045	0.000281512	0.000273439	0.000380099	8.08663e-05	3.88226e-05	0.000206797	0.000130047	0.00025051	0.000143826	0.00366317	0.00264707	0.000352377	0.00390316	0.00480248	0.00265784	0.0124689	0.000518097	0.000605517	0.0055713	0.000789816	0.00222087	0.00378783	0.00453083	0.00318056	0.00343002	0.000977082	0.00404133	0.00398682	5.3272e-05	2.9069e-05	4.11705e-05	1.7114e-05
597	C2Cl4H	164.883	5.61403e-05	0.000113644	4.30754e-05	1.91067e-05	1.58028e-05	4.11503e-05	4.81532e-05	3.55468e-05	3.19452e-05	2.69756e-05	3.30169e-05	0	0	0.000419792	0	0	0.00832328	0	0.000223773	0.000638471	0.000138756	1.10056e-05	0.000139931	0.00284902	0.000388614	0.000847142	0.00134375	0.00138854	0.00304583	0	9.50552e-07	4.75276e-07	6.72142e-07
598	C3HF5O2H	164.997	3.35087e-05	0.000706903	0.000335023	0.000471159	0.000121766	0.000129843	0.000299701	0.000256059	0.000335922	0.000177958	0	0	0	0	0	0	0	0	0	0	0	0	0	0	0	0	0	0	0	2.27259e-05	9.92499e-06	1.63254e-05	9.05161e-06
599	C8H4O4H	165.018	0	0	0.000104938	2.40698e-05	0.000178128	1.53112e-05	5.37411e-05	7.24246e-05	6.01591e-05	6.09098e-05	0.132969	0.00507784	0.000130744	0.0011199	0	0	0.0121654	0.000315906	0	0	0	0.046059	0.0003733	0.00416043	0	0.0126482	0.0223531	0.0335929	0.0584997	0	0	0	0
600	C5H8O6H	165.039	1.48007e-05	4.21206e-06	2.01759e-05	6.5712e-06	3.03412e-05	8.03104e-06	1.4022e-05	9.92405e-06	1.32084e-05	9.04803e-06	0.0167199	0.00341985	0.000219232	0.00538489	0.00213112	0.00187595	0.0121651	0.00048486	0.000628904	0.00423585	0.000903604	0.00678632	0.00313065	0.00442629	0.00256973	0.00422825	0.00187425	0.00702919	0.0071072	8.67804e-05	0.000103789	9.52849e-05	1.20272e-05
601	C9H8O3H	165.055	3.433e-05	4.40077e-05	0.000114332	6.42355e-06	2.16922e-05	1.68786e-05	3.96108e-05	3.89096e-05	3.35369e-05	4.08125e-05	0.265872	0.03357	0.000312092	0.0655226	0.0151997	0.0159893	0.0968841	0.00212365	0.00095122	0.0126768	0	0.099918	0.0322372	0.0333197	0.00633841	0.0429533	0.0399719	0.0859623	0.112244	0.000712893	0.000756009	0.000734451	3.04879e-05
602	C6H12O5H	165.076	0.000128044	0.000328075	0.000272711	0.000126352	6.44202e-05	3.07147e-05	0.000158386	0.000117423	0.00013909	9.02133e-05	0.0331733	0.0107101	3.07457e-05	0.0159684	0.00847817	0.0072909	0.0525831	0.00198324	0.00122673	0.017859	0.000385007	0.0146381	0.0105792	0.0185977	0.00912203	0.0132342	0.00426994	0.0199795	0.0196262	0.000228451	0.000231572	0.000230011	2.20661e-06
603	C10H12O2H	165.091	0.00132779	0.00509078	0.000876361	0.000795856	0.000154418	0.000136751	0.00139699	0.0018662	0.000819528	0.00114167	0.251126	0.0413385	0	0.101194	0.0103748	0.00531429	0.154069	0.00137722	0	0.0187623	0	0.097488	0.0389611	0.0518152	0.00938114	0.0494114	0.0366459	0.0939259	0.109843	0.000752923	0.000523745	0.000638334	0.000162054
604	C7H16O4H	165.112	0.000148607	0.000454768	0.000231527	0.000251551	8.86876e-05	0.000131905	0.000217841	0.00013139	0.000210135	8.31066e-05	0.0232251	0.00571597	0	0.00282476	0	0	0.0540542	0.00110402	4.41252e-06	0.029429	0	0.00964703	0.000941587	0.0183875	0.0147145	0.0109227	0.00755759	0.0169754	0.0198541	0.000302432	0.000235144	0.000268788	4.75792e-05
605	C11H16OH	165.127	0.000554144	0.00180128	0.000476977	0.000429315	0.000151403	0.000142354	0.000592579	0.000616409	0.000416629	0.000375576	0.364238	0.0719085	0.0021365	0.254273	0.0644506	0.0328909	0.437208	0.00524049	0.00068303	0.0810815	0.00182211	0.146094	0.117205	0.14771	0.0414518	0.113115	0.049789	0.180412	0.189434	0.000363943	0.000372633	0.000368288	6.14509e-06
606	C12H20H	165.164	0.0266444	0.0301661	0.0158679	0.0136309	0.00236445	0.00156765	0.0150402	0.0119021	0.0115882	0.00825699	2.66103	1.10779	0.357117	2.31062	1.50296	1.06276	5.67816	0.259167	0.439088	2.08142	0.88076	1.37531	1.62545	2.12547	1.48109	1.65183	0.331988	2.08353	1.82483	0.00176515	0.00235885	0.002062	0.000419809
607	C8H7NOSH	166.032	2.17767e-05	5.6092e-05	1.5342e-05	1.5599e-05	5.90967e-06	9.27263e-06	2.06653e-05	1.82089e-05	1.5083e-05	1.12485e-05	0.00573906	0.000256331	3.57481e-05	0.00209861	0.00094367	0.000397594	0.00386861	0	3.86929e-05	0.000648324	0	0.00201038	0.00114663	0.00130243	0.000324162	0.0011959	0.000692118	0.00210777	0.00255543	4.86811e-06	1.99888e-05	1.24285e-05	1.06919e-05
608	C8H7NO3H	166.05	2.27858e-05	3.27498e-05	4.37457e-05	3.96577e-05	1.1898e-05	1.91357e-05	2.83288e-05	1.2416e-05	3.2162e-05	1.25105e-05	0.0627823	0.00679185	0.000294528	0.0217177	0.0267209	0.00306262	0.0228841	0	0.000380806	0.00971194	0	0.0232896	0.0171671	0.00775497	0.00485597	0.0132669	0.00850079	0.0211797	0.0254947	6.40065e-05	4.25694e-05	5.32879e-05	1.51583e-05
609	C13H10	166.078	0.000322678	0.000622793	0.000203572	0.000100312	1.90947e-05	1.25614e-05	0.000213502	0.000232603	0.000124112	0.000159491	0.0102928	0.00223526	9.42245e-05	0.00591905	0.00181949	0.000115299	0.0103997	6.34178e-05	7.37533e-05	0.00153651	0.000119214	0.00420743	0.00261795	0.00351228	0.00082786	0.00279138	0.00146178	0.00473478	0.00498954	4.54761e-05	2.91735e-05	3.73248e-05	1.15277e-05
610	C9H11NO2H	166.086	8.88337e-05	0.000321996	0.000138653	6.23853e-05	7.50225e-06	1.20017e-05	0.000105229	0.000117005	7.31646e-05	7.70348e-05	0.00246743	0.000991094	3.63294e-05	0.00240319	0.000173171	0.000224384	0.00582858	0	2.12715e-05	0.000761884	2.15693e-05	0.00116495	0.00093358	0.00194995	0.000391727	0.00111005	0.000646936	0.00178641	0.00209257	4.14772e-05	2.83939e-05	3.49355e-05	9.25128e-06
611	C10H15NOH	166.123	0.00151735	0.00309952	0.000810314	0.000796525	4.38776e-05	1.37805e-05	0.00104689	0.00115123	0.0006872	0.000744246	0.00603414	0.000747203	0.000200033	0.00741435	0.00325183	0.00127948	0.017325	0	0.000426923	0.00456904	0.000557193	0.00232713	0.00398189	0.00591729	0.00256312	0.00369736	0.00165057	0.00490746	0.00601592	3.48411e-05	2.17802e-05	2.83106e-05	9.23548e-06
612	C12H21H	166.172	0.00178501	0.00265816	0.00125818	0.00121619	0.000138674	4.08915e-05	0.00118285	0.000994013	0.000958105	0.000693044	0.00688683	0.00242122	0.0033282	0.0152003	0.0141394	0.0089632	0.0386513	0	0.00444653	0.0191248	0.0096378	0.00421208	0.0127676	0.0143659	0.0143813	0.0114317	0.00487228	0.0112865	0.0127608	2.27511e-05	3.74771e-05	3.01141e-05	1.04129e-05
613	C2H2Cl4H	166.898	5.53566e-05	0.000143932	6.31241e-05	0.000135679	4.20052e-05	0.000131144	9.52068e-05	4.6371e-05	0.000104609	4.10372e-05	0.000168856	5.50594e-05	0	0.000314101	0.000508484	0.000150928	0.00271286	0	3.94235e-05	0.00031742	5.37064e-05	7.46386e-05	0.000324504	0.000917427	0.000185563	0.000375533	0.000375446	0.000522262	0.000962719	3.16649e-07	5.03762e-06	2.67714e-06	3.33823e-06
614	C8H6O4H	167.034	0.000651627	0.000842843	0.000147481	0	0.000336614	0.00129262	0.000545198	0.000481143	0.000337363	0.000503884	0.0401609	0.00579111	0.000379047	0.00534046	0.000502378	0.00301459	0.00949025	0.000940373	0.00616515	0	0.00203883	0.0154437	0.00295247	0.00553193	0.00101941	0.00623688	0.0064102	0.0125592	0.0166739	0	0.000651781	0.00032589	0.000460879
615	C9H10O3H	167.07	0.000468813	0.00194271	0.000895025	0.00049983	0.000182854	0.00021431	0.00070059	0.000660184	0.000546225	0.00041634	0.128992	0.0186367	0.000217128	0.0327038	0.00515943	0.0064022	0.0740944	0.00088872	0.00127304	0.00747664	0.00231396	0.0492821	0.0147551	0.0254187	0.0048953	0.0235878	0.0190698	0.0466117	0.0562037	0.000952044	0.000590728	0.000771386	0.000255489
616	C13H10H	167.086	0.00678964	0.0141527	0.00161362	0.00103669	9.25393e-05	0.000134439	0.00396994	0.00557748	0.00162443	0.00377059	0.0828761	0.0282461	0.000450148	0.0892269	0.0065808	0.00265923	0.137348	0.00139335	0.000413364	0.0172851	0	0.0371908	0.0328223	0.046385	0.00864255	0.0312602	0.0161031	0.0496615	0.0529521	0	0.000188369	9.41846e-05	0.000133197
617	C10H14SH	167.089	0.00543864	0.00939697	0.0018614	0.00115889	0.000101177	9.99884e-05	0.00300951	0.00369776	0.00146516	0.00251695	0.0267491	0.017325	0.000264239	0.0408471	0.00839815	0.00535664	0.0972413	0.0019048	0.000152464	0.0285057	0	0.0147795	0.0182006	0.0330995	0.0142529	0.0200831	0.00885232	0.0279612	0.0329302	0.000187951	0.000209934	0.000198943	1.55441e-05
618	C10H14O2H	167.107	0.000604378	0.00263244	0.000898668	0.000648974	8.41547e-05	3.25997e-05	0.00081687	0.000951661	0.00060209	0.000583886	0.378394	0.057497	0.000213598	0.137487	0.0309753	0.0266181	0.344551	0.00440459	0.000763614	0.0478135	0	0.145368	0.0650267	0.116573	0.0239068	0.0877187	0.0539844	0.160022	0.180611	0.00251868	0.00180034	0.00215951	0.000507943
619	C11H18OH	167.143	0.000732024	0.00153697	0.000448715	0.000704103	0.000138401	2.94281e-05	0.000598273	0.000541787	0.000502002	0.000363164	0.490128	0.116711	0.000642164	0.397163	0.0930031	0.0342072	0.811961	0.00578883	0.00189216	0.192509	0.000790712	0.202494	0.174791	0.273214	0.0966497	0.186787	0.0729953	0.287996	0.309378	0.000441409	0.000410298	0.000425854	2.19988e-05
620	C12H22H	167.179	0.0104011	0.0171545	0.0106442	0.00839258	0.0015504	0.00081643	0.00815985	0.00616056	0.00704954	0.00448041	0.820164	0.339222	0.0385263	0.78533	0.329859	0.186671	2.03228	0.0612831	0.0632621	0.412801	0.105448	0.399304	0.433953	0.718942	0.259124	0.452831	0.192838	0.646336	0.690103	0.00184818	0.00276438	0.00230628	0.000647857
621	C7H5NO4H	168.029	2.10198e-05	1.87902e-05	2.32499e-05	1.15633e-06	1.04966e-05	1.16715e-05	1.43974e-05	8.24006e-06	9.83329e-06	9.75523e-06	0.0954058	0.0165318	0.000572273	0.000606525	0	0	0.0101439	0.00198182	0.00203286	0	0.000235701	0.0375033	0.000202175	0.00471952	0.00011785	0.0106357	0.0180402	0.0269377	0.0413211	0.00027744	0.000282618	0.000280029	3.66134e-06
622	C8H9NO3H	168.066	0.000777567	0.00448728	0.000193604	0.000414542	8.26812e-05	8.84439e-05	0.00100735	0.00172486	0.000464852	0.0010416	0.0842792	0.0269313	0.000174513	0.0447126	0.0373815	0.00167833	0.0595596	0.000774677	0.000495175	0.0179986	0	0.0371283	0.0279241	0.0202765	0.0089993	0.0235821	0.0119155	0.0369215	0.0353168	8.12476e-05	0.000130884	0.000106066	3.50983e-05
623	C9H13NO2H	168.102	0.000137429	0.000292858	0.000223762	0.000231283	2.37294e-05	2.91161e-05	0.000156363	0.000112186	0.0001665	9.65497e-05	0.00704355	0.00293733	6.31182e-05	0.0132027	0.00204866	0.000238764	0.016432	0.000393495	3.06237e-05	0.00360786	0	0.003348	0.00516337	0.0056187	0.00180393	0.0039835	0.00175313	0.00542535	0.00581761	9.37068e-05	4.37786e-05	6.87427e-05	3.53046e-05
624	C10H17NOH	168.138	3.52242e-05	4.53212e-05	6.38001e-05	9.35411e-05	9.33969e-06	7.92829e-06	4.25258e-05	3.29077e-05	5.77049e-05	3.93646e-05	0.0032475	0.0014181	1.85304e-05	0.00406653	0.00128465	7.72002e-05	0.00840869	6.80858e-05	0.000139909	0.00180386	4.21764e-05	0.00156138	0.00180946	0.00287223	0.00092302	0.00179152	0.000811482	0.002598	0.00291588	6.19504e-05	2.36646e-05	4.28075e-05	2.70721e-05
625	C11H21NH	168.175	0.000732456	0.000396887	0.000238424	0.000853192	2.18612e-05	6.13603e-06	0.000374826	0.000356747	0.000452305	0.000380679	0.00356745	0.00322453	0.000130496	0.00406102	0.00874925	0.000791597	0.0084976	0.000430487	0.00029702	0.00262553	0.000822529	0.00230749	0.00453395	0.00307504	0.00172403	0.00291013	0.00121573	0.00333979	0.0027931	1.72931e-06	1.38585e-05	7.79389e-06	8.57662e-06
626	C12H23H	168.187	0.000285049	0.000463426	0.000204189	0.000290581	2.35084e-05	1.4659e-05	0.000213569	0.000172769	0.0001978	0.000131125	0.00326454	0.00206482	0.000379546	0.00405182	0.00329439	0.00132824	0.00834566	0.000393719	0.00049436	0.00351565	0.00121421	0.00190297	0.00289148	0.00307791	0.00236493	0.00255932	0.00053162	0.00303677	0.00260983	1.97044e-05	2.65769e-05	2.31407e-05	4.85957e-06
627	C5H3Cl3H	168.937	0.00020786	0.000337586	7.47518e-05	0.000101163	1.92428e-05	5.41839e-06	0.000124337	0.000126991	8.25094e-05	8.27335e-05	0	0	0	0	0	0	0	0	0	0.000130577	0	0	0	0	6.52886e-05	1.63221e-05	3.26443e-05	8.48751e-06	3.31303e-05	0	5.00933e-06	2.50467e-06	3.54213e-06
628	C7H4O5H	169.013	0	0	4.32083e-06	8.29996e-06	3.62192e-06	1.50704e-05	5.21885e-06	5.73368e-06	7.24072e-06	4.64974e-06	0	7.53359e-05	6.70513e-05	0	0	0	0	5.34088e-05	0.00011863	0	3.15189e-05	4.74624e-05	0	5.73464e-05	1.57595e-05	3.01421e-05	2.68047e-05	3.26391e-05	3.71413e-05	1.42851e-05	9.68449e-06	1.19848e-05	3.25311e-06
629	C6H4N2O4H	169.024	5.95314e-05	0	6.75454e-05	3.81597e-05	0.000103065	0.000156804	7.08509e-05	5.41356e-05	7.10547e-05	4.45848e-05	0.00179047	0.000311811	8.2846e-05	0	0	0	0	0.000506392	0.000544208	0	0.00021451	0.000728377	0	0.0003502	0.000107255	0.000296458	0.000323073	0.000576784	0.00074331	0.000432174	0.000186805	0.000309489	0.000173502
630	C8H8O4H	169.05	0.000872268	0.000652579	0.00060358	0.000489036	0.000388821	0.000247618	0.000542317	0.000218186	0.000476988	0.000150979	0.0257179	0.00364628	0.000371681	0.00463946	0.00302967	0.00207021	0.00476552	0.00169419	0.00177945	0.00310643	0.000621333	0.00991196	0.00324645	0.00274639	0.00186388	0.00444217	0.00369105	0.00810581	0.0104117	0.000709373	0.000446997	0.000578185	0.000185527
631	C9H12O3H	169.086	0.00293063	0.0053662	0.00303391	0.00270412	0.000512014	0.000547072	0.00251566	0.00181614	0.00222175	0.00128694	0.159961	0.0521782	0.00148345	0.132767	0.0676759	0.0174707	0.204894	0.00971036	4.02766e-05	0.0256475	0	0.0712076	0.072638	0.0715481	0.0128237	0.0570544	0.0294934	0.0865485	0.0837181	0.00118827	0.000654341	0.000921304	0.000377542
632	C13H12H	169.101	0.0230308	0.0370087	0.00950436	0.00816972	0.000671591	0.000233479	0.0131031	0.0143353	0.00778362	0.00953715	0.434362	0.234344	0.00193957	0.888248	0.214908	0.0450594	1.12501	0.00465908	0.00355676	0.341601	0.00162794	0.223549	0.382738	0.377742	0.171614	0.288911	0.107587	0.371172	0.389374	0.000262181	0.000570299	0.00041624	0.000217872
633	C10H16SH	169.105	0.019525	0.0306866	0.00886379	0.00776083	0.000707812	0.00028519	0.0113049	0.0117938	0.00711141	0.00784341	0.16529	0.115419	0.00130628	0.251692	0.13202	0.0306154	0.805985	0.00672828	0.00415772	0.319876	0.000863131	0.0940052	0.138109	0.27229	0.16037	0.166194	0.0759173	0.217105	0.2737	0.000172989	0.000501349	0.000337169	0.000232186
634	C10H16O2H	169.122	6.29247e-05	0.000213856	0.00026723	0.000134042	0.000191011	0.000152742	0.000170301	7.05321e-05	0.00017263	5.38368e-05	0.407768	0.076291	0.000442412	0.264627	0.0484768	0.0307005	0.509727	0.00734848	0.00281971	0.0940353	0.00051968	0.1615	0.114601	0.173298	0.0472775	0.124169	0.0571874	0.203522	0.218399	0.00233758	0.00178482	0.0020612	0.000390857
635	C11H20OH	169.159	0.000722638	0.00330683	0.000409946	0.000466686	0.000300551	9.18183e-05	0.000883078	0.00120524	0.000507749	0.000728512	0.4118	0.121882	0.00104	0.426987	0.104138	0.0329026	0.84571	0.00566967	0.00274633	0.204747	0.000341805	0.178241	0.188009	0.284709	0.102545	0.188376	0.0747214	0.277996	0.304787	0.000271645	0.000239737	0.000255691	2.25619e-05
636	C12H24H	169.195	0.0410191	0.0696524	0.0304758	0.0227841	0.00414799	0.0014103	0.0282483	0.0253508	0.0207278	0.0172248	0.738616	0.327745	0.0207552	0.737562	0.297633	0.133386	2.25211	0.0491581	0.0452179	0.432658	0.0672921	0.362372	0.389527	0.782161	0.249975	0.446009	0.232101	0.652437	0.767013	0.00207454	0.00308113	0.00257784	0.000711768
637	C6H3NO5H	170.008	5.62781e-06	1.07398e-05	8.48664e-06	1.02317e-06	4.15316e-06	4.77443e-06	5.80083e-06	3.41266e-06	4.08723e-06	3.57207e-06	0.000844407	2.68681e-05	3.84809e-06	0	0	0	0.000620024	0	5.1543e-05	3.6365e-06	0	0.000291708	0	0.000223856	1.81825e-06	0.000129345	0.000150872	0.000300202	0.000405457	2.19944e-05	7.43867e-06	1.47166e-05	1.02925e-05
638	C7H7NO4H	170.045	5.89156e-06	1.77375e-05	3.22147e-05	3.40856e-05	1.71364e-05	3.29261e-05	2.3332e-05	1.1493e-05	2.9349e-05	9.74182e-06	0.0104007	0.00132868	8.34138e-05	0.000993416	0	0	0	8.02436e-05	0.000304133	0.000413584	0	0.00393762	0.000331139	0.000128126	0.000206792	0.00115092	0.00185968	0.00272072	0.00451709	6.62398e-05	3.32926e-05	4.97662e-05	2.32972e-05
639	C11H7ONH	170.06	0.000629872	0.00129525	0.000273325	0.000282591	2.76102e-05	2.74235e-05	0.000422678	0.000481361	0.000257991	0.000310486	0.013542	0.003252	0.000188425	0.00668885	0.00311497	0.00153027	0.00873339	0.000465123	0.00013322	0.00122688	0.00024839	0.0056608	0.00377803	0.00311058	0.000737633	0.00332176	0.00203319	0.00551112	0.00567688	3.53544e-05	3.62926e-05	3.58235e-05	6.63396e-07
640	C8H11NO3H	170.081	0.000772377	0.00159455	0.00036606	0.000398108	3.1943e-05	6.19951e-05	0.000537506	0.000583617	0.000348553	0.000374475	0.0215474	0.00539202	0.000178797	0.012313	0.00310157	0.000551417	0.0176726	0.000902976	2.7204e-05	0.00244096	0	0.00903942	0.00532199	0.00620093	0.00122048	0.0054457	0.0032328	0.00939433	0.00967772	7.72931e-05	3.64172e-05	5.68551e-05	2.89036e-05
641	C12H11NH	170.096	0.000424202	0.000680096	0.000260111	0.000199496	3.79543e-05	2.99981e-05	0.000271976	0.000248374	0.000188296	0.000167206	0.00796343	0.00449242	6.15437e-05	0.0138582	0.00401401	0.00117126	0.0262861	0.000783516	0.000174656	0.00773009	0.000514224	0.00417247	0.00634783	0.00908143	0.00412216	0.00593097	0.0023426	0.0078845	0.0088337	4.57741e-05	2.80531e-05	3.69136e-05	1.25306e-05
642	C13H14	170.109	0.00048027	0.000747311	0.000212849	0.000162613	1.95135e-05	2.0612e-05	0.000273861	0.000286945	0.000164001	0.000192977	0.00771862	0.00328824	0.000274702	0.0152517	0.0028498	0.00088117	0.0300078	0.00058735	0	0.00704231	0.000134478	0.00376052	0.00632755	0.0101984	0.00358839	0.00596871	0.00308549	0.00812472	0.0102779	4.29045e-05	4.15098e-05	4.22071e-05	9.86249e-07
643	C9H15NO2H	170.118	5.76794e-05	0.000136822	0.000127745	0.000122202	1.72696e-05	3.49984e-05	8.27861e-05	5.23474e-05	9.22981e-05	4.70391e-05	0.00676252	0.00238984	8.60228e-05	0.00746026	0.00151135	0.000238727	0.0179424	2.8646e-05	0	0.00186316	0	0.00307946	0.00307011	0.00599033	0.000931581	0.00326787	0.00207723	0.00517248	0.00638863	8.06189e-05	3.62016e-05	5.84102e-05	3.14078e-05
644	C10H19NOH	170.154	7.132e-05	6.29652e-05	0.000487511	0.000846091	6.32418e-05	0.000318848	0.000308329	0.000315547	0.000516709	0.000377795	0.00311654	0.00135447	7.35042e-05	0.00478704	0.00078013	0.000109763	0.00689861	6.8651e-05	6.44736e-05	0.000467968	0	0.00151484	0.00189231	0.00234391	0.000233984	0.00149626	0.000907203	0.00223947	0.00249883	0.000390372	0.000146157	0.000268265	0.000172686
645	C2Cl2F4H	170.939	2.00058e-05	3.52622e-05	1.17425e-06	3.5569e-07	4.58461e-08	4.98671e-06	1.03051e-05	1.43726e-05	3.33995e-06	1.04632e-05	2.23301e-05	0	4.02129e-06	0.000311212	0.000282879	0.000212017	0.00693249	0	0.000102565	0.000641621	0.000156579	8.7838e-06	0.000268703	0.00234502	0.0003991	0.000755401	0.00107209	0.0011685	0.00252677	1.5719e-05	1.80753e-05	1.68971e-05	1.66613e-06
646	C3HF7H	171.004	3.24007e-06	0	3.29106e-06	4.37566e-07	8.58362e-06	1.30286e-05	4.76349e-06	5.07541e-06	4.25085e-06	4.7188e-06	0.000282995	0	0	0	0	8.90149e-05	0.000754496	0	0.000206728	4.98807e-05	0.000180629	9.43316e-05	2.96716e-05	0.000320408	0.000115255	0.000139917	0.000125721	0.000210851	0.000270373	2.3262e-05	2.4735e-05	2.39985e-05	1.0416e-06
647	C7H6O5H	171.029	1.82494e-05	7.83587e-06	2.43954e-05	7.79444e-06	2.76885e-05	3.08973e-05	1.94768e-05	9.95537e-06	1.79238e-05	9.96676e-06	0.00126027	0	0.000117998	0	6.77023e-05	0.000445477	0.00084202	0	0.000346738	0.000155484	0.000353349	0.000459423	0.00017106	0.000396253	0.000254417	0.000320288	0.000131323	0.000489728	0.000535091	2.14691e-05	7.70944e-05	4.92818e-05	3.93331e-05
648	C8H10O4H	171.065	0.00131287	0.00372763	0.000557412	0.000142122	0.000371615	0.00120445	0.00121935	0.00131283	0.000617499	0.000985551	0.264553	0.0624718	0.0010949	0.0515855	0	0.000755069	0.125565	0.0123068	0.00077754	0	0	0.109373	0.0174469	0.0462164	0	0.0432591	0.0480188	0.0947935	0.114404	0.000772372	0.000917302	0.000844837	0.000102481
649	C9H14O3H	171.102	0.00216776	0.00910546	0.00226605	0.0017565	0.0017589	0.00109186	0.00302442	0.00300772	0.00209455	0.00181759	0.488427	0.119331	0.00357038	0.178446	0.00877135	0.0313268	0.259279	0.0438642	0.00593921	0	0	0.203776	0.0728482	0.103027	0	0.094913	0.0844835	0.185669	0.207489	0.00262855	0.00295167	0.00279011	0.000228478
650	C13H14H	171.117	0.0621339	0.107125	0.0233535	0.0159849	0.00060528	0.000296276	0.0349165	0.0420067	0.018078	0.0283158	0.764869	0.354064	0.0016619	1.56531	0.235271	0.0523326	3.3523	0.00602184	0.00323887	0.584699	0.00101324	0.373531	0.617637	1.12052	0.292856	0.601136	0.37277	0.85351	1.16134	0.000316159	0.000622646	0.000469402	0.000216719
651	C10H18O2H	171.138	0.00278814	0.00630379	0.00229236	0.00157339	0.000425514	0.000227662	0.00226848	0.00221806	0.00157476	0.00145415	0.491228	0.136599	0.000650814	0.383975	0.0668829	0.0351089	0.895885	0.0110473	0.00448563	0.236702	0.00219267	0.209493	0.161989	0.303806	0.119447	0.198684	0.0791465	0.307697	0.331841	0.000943312	0.00132404	0.00113368	0.000269214
652	C9H18N2OH	171.149	0.000257313	0.000484121	6.46393e-05	1.80102e-05	4.92301e-05	0.000142603	0.000169319	0.000176539	7.91435e-05	0.000137307	0.000219864	0.000353968	0.000230862	0.0417441	0.0022817	0	0.0126316	0	0.00027395	0.0221664	0	0.000268231	0.0146753	0.00430184	0.0110832	0.00758213	0.00650188	0.00478652	0.00953101	0.000149109	4.9703e-05	9.94059e-05	7.02906e-05
653	C11H22OH	171.174	0.00358399	0.00923184	0.000850893	0.00101361	0.00123685	0.000262186	0.00269656	0.0033998	0.00134786	0.00224605	0.367025	0.147227	0.00245313	0.469015	0.129628	0.0380056	0.978022	0.0036091	0.00527491	0.194602	0.00276382	0.172235	0.212216	0.328969	0.0986832	0.203026	0.0962316	0.294141	0.340406	0.00064246	0.000818751	0.000730606	0.000124656
654	C12H26H	171.211	0.057867	0.0951594	0.0313081	0.0384963	0.0577157	0.0178364	0.0497305	0.0271167	0.0400318	0.0195021	3.29487	0.772048	0.124004	19.883	6.81096	2.70223	27.6263	0	0.294249	0	0	1.39698	9.79874	9.30686	0	5.12564	5.14767	5.98833	9.97406	0.0515496	0.0636398	0.0575947	0.00854908
655	C6H5NO5H	172.024	3.66228e-08	0	2.80905e-06	3.60159e-08	3.85278e-06	1.85023e-06	1.43078e-06	1.666e-06	1.43405e-06	1.50783e-06	0.00156945	0.000824757	1.18101e-05	0.000517659	0	7.35581e-05	0.00104248	0.000637415	1.66298e-05	0	0	0.000802007	0.000197072	0.000565509	0	0.000391147	0.000360494	0.00076326	0.000685919	1.15279e-05	2.35042e-05	1.7516e-05	8.46856e-06
656	C10H5O2NH	172.039	3.58778e-06	2.64939e-06	1.3751e-05	1.02211e-05	7.18881e-06	4.7798e-06	7.02966e-06	4.27745e-06	9.04643e-06	3.86812e-06	0.0405173	0.00374708	7.57081e-05	0.000861044	0	0	0.00990568	0.000386858	0	0	0	0.01478	0.000287015	0.00343085	0	0.00462448	0.00694645	0.0116462	0.0176294	0	0.000100984	5.04919e-05	7.14064e-05
657	C7H9NO4H	172.06	2.59371e-05	2.93831e-05	2.92964e-05	2.8992e-05	2.20515e-06	1.26873e-05	2.14168e-05	1.139e-05	2.23184e-05	1.0417e-05	0.0015593	0	0.000217175	0.000669409	0	8.79687e-05	0.00246962	0	0.000162638	0	4.03262e-05	0.000592157	0.000252459	0.00087742	2.01631e-05	0.00043555	0.00037676	0.000794489	0.00101704	1.77864e-05	3.2515e-05	2.51507e-05	1.04147e-05
658	C8H13NO3H	172.097	0.000492994	0.00111021	0.000330395	0.000254349	4.55137e-05	4.49934e-05	0.000379742	0.000397072	0.000249936	0.000257129	0.0211697	0.00398248	6.01944e-05	0.0188239	0.00335339	0.00153409	0.0321303	7.75592e-05	0.000285556	0.00419281	0.000178098	0.00840413	0.0079038	0.0108311	0.00218546	0.00733113	0.00366093	0.0115592	0.0128055	0.000212203	0.000133754	0.000172979	5.54715e-05
659	C9H17NO2H	172.133	0.000126547	0.000265463	0.000158917	0.000176096	2.54026e-05	4.11379e-05	0.00013226	8.95874e-05	0.000131217	6.92735e-05	0.0131619	0.00227466	6.09379e-05	0.00986225	0.00312782	0.00139647	0.0196243	0.000106484	0.000206627	0.00608182	0	0.00516584	0.00479551	0.00664581	0.00304091	0.00491202	0.00148156	0.00729984	0.00769182	8.8757e-05	5.80611e-05	7.3409e-05	2.17053e-05
660	C10H21NOH	172.17	0.000446561	0.000299403	0.000142017	0.000308434	2.50816e-05	2.78716e-05	0.000208228	0.000170653	0.000193261	0.000131875	0.00194774	0.000431093	3.92757e-05	0.00410451	0.00440009	0.000366878	0.00758837	0	0	0.00671958	0.000198918	0.000806038	0.00295716	0.00252946	0.00345925	0.00243798	0.00115241	0.00238538	0.00284585	4.63791e-06	2.72262e-05	1.5932e-05	1.59723e-05
661	C5H7Cl3H	172.969	0.000419204	0.000608564	3.45807e-05	4.75664e-05	3.16282e-05	2.32263e-05	0.000194128	0.000254938	7.52572e-05	0.000178416	0	0.000469428	0.00152903	0	0	0	0	0.00030047	0.00212297	0	0.00101742	0.000666153	0	0.000807812	0.000508711	0.000495669	0.000352305	0.000408422	0.000600772	0	0.000109755	5.48773e-05	7.76083e-05
662	C6H4O6H	173.008	4.92063e-06	5.53149e-07	7.02607e-06	2.79597e-06	1.66201e-05	1.22363e-05	7.35869e-06	6.0457e-06	7.16108e-06	5.29708e-06	6.21284e-07	1.03183e-06	0	0	0	3.47391e-06	0.00127007	0	2.02835e-05	0.000316795	7.88147e-05	5.51037e-07	1.15797e-06	0.000430117	0.000197805	0.000157408	0.000204141	0.000226879	0.000462151	2.73209e-06	3.96182e-06	3.34696e-06	8.69551e-07
663	C10H4O3H	173.023	1.83384e-05	3.49148e-05	2.06397e-06	8.66954e-07	1.04339e-05	1.21179e-05	1.31227e-05	1.25127e-05	6.36824e-06	1.05192e-05	1.81598e-05	3.70596e-06	1.26997e-05	5.57027e-05	0	0.000110982	0.000266874	0	3.10763e-05	0	0	1.15218e-05	5.55615e-05	9.93167e-05	0	4.16e-05	4.53188e-05	5.17947e-05	9.45492e-05	8.56438e-06	9.1784e-06	8.87139e-06	4.34179e-07
664	C7H8O5H	173.044	2.40245e-05	5.57012e-05	6.04071e-05	2.7555e-05	9.75839e-06	2.89777e-05	3.4404e-05	1.96022e-05	3.24606e-05	1.64657e-05	0.00193237	0.00179911	6.4055e-05	0.00241977	0.000346153	0.00179706	0.00192877	0.00111193	0.000211371	0.000476153	0	0.00126518	0.00152099	0.00108402	0.000238077	0.00102707	0.000555701	0.00133416	0.000829125	0	4.18437e-05	2.09218e-05	2.95879e-05
665	C11H8O2H	173.06	0.000105479	0.000242954	0.000211726	6.04851e-05	2.75274e-05	6.46572e-05	0.000118805	8.81927e-05	9.44857e-05	7.43896e-05	0.353918	0.0646576	0.000353903	0.0786555	0.014853	0.012285	0.125833	0.00508651	0.0015154	0.00420935	0	0.139643	0.0352645	0.044145	0.00210467	0.0552893	0.0590744	0.116446	0.150054	0.000189159	0.000811856	0.000500507	0.000440313
666	C8H12O4H	173.081	0.000167776	0.000392847	0.000327706	0.000365096	0.000216751	0.000188013	0.000276365	9.71891e-05	0.000303005	8.10493e-05	0.0339636	0.00924448	0.00106341	0.0120969	0.00215018	0.00284851	0.0136867	0.00611768	0.00218029	0	0	0.0147572	0.00569852	0.00732821	0	0.00694597	0.00608176	0.0129395	0.0137247	0.00101205	0.00061897	0.000815509	0.000277947
667	C12H12OH	173.096	0.0025873	0.00534888	0.000711581	0.000415781	0.000525004	0.000222886	0.00163524	0.00201321	0.000746486	0.00139333	0.338762	0.075787	0.00118729	0.167619	0.0335545	0.02078	0.262104	0.0154343	0.000602278	0.038577	0	0.138579	0.0739844	0.0927135	0.0192885	0.0811413	0.0493625	0.142748	0.15053	0.000812348	0.000816662	0.000814505	3.05039e-06
668	C9H16O3H	173.117	0.00096028	0.00194739	0.000526997	0.000617384	0.000240612	0.000159282	0.000741991	0.000656249	0.000541269	0.000416581	0.0493032	0.0166791	0.00122794	0.0853958	0.0149238	0.00975314	0.0383661	0.00897893	0.00375579	0.0180725	0	0.0224034	0.0366909	0.0170336	0.00903623	0.021291	0.0116433	0.0256604	0.0210599	0.00398888	0.00345973	0.00372431	0.000374166
669	C13H16H	173.132	0.0165465	0.0400245	0.008885	0.00970287	0.000529503	0.000144966	0.0126389	0.0147695	0.00822246	0.00934529	0.9432	0.301164	0.000860353	0.985107	0.224513	0.0673888	2.2425	0.0100356	0.00754209	0.65018	0.00130381	0.415075	0.425669	0.75336	0.325742	0.479961	0.187695	0.699772	0.790791	0.000802657	0.000995898	0.000899277	0.000136642
670	C10H20O2H	173.154	0.000411685	0.00114881	0.00103112	0.00124205	0.000762805	0.00080899	0.000900909	0.000303857	0.0010317	0.000258643	0.0731786	0.041444	0.000722254	0.0907324	0	0	0.109717	0.00248744	0	0.00731097	0	0.0384483	0.0302441	0.0374016	0.00365549	0.0274374	0.0162684	0.0447478	0.0442674	0	0.000185775	9.28876e-05	0.000131363
671	C11H24OH	173.19	0	0	7.87088e-06	8.3366e-06	4.15013e-06	2.01104e-05	6.74467e-06	7.48542e-06	8.79464e-06	5.7768e-06	0	0.000149022	6.45381e-07	0.00131424	0	0	0.00156601	0	0	0	0	4.9889e-05	0.000438081	0.000522003	0	0.000252493	0.000265757	0.000308789	0.000587445	0	0	0	0
672	C6H7NO5H	174.04	1.0871e-05	2.93874e-05	6.65138e-06	1.02627e-06	5.96892e-06	2.94448e-06	9.47491e-06	1.03223e-05	4.73226e-06	7.63206e-06	0.00409808	0.00198984	0.000188342	0.000795218	0	0.00010193	0.00017777	0.000351677	0.000367009	0	0	0.00209209	0.000299049	0.000298819	0	0.000672489	0.000956833	0.00142011	0.00177804	2.5396e-05	1.63465e-05	2.08712e-05	6.39897e-06
673	C10H7NO2H	174.055	6.40481e-06	2.17586e-05	1.6891e-05	1.48281e-05	1.50657e-06	9.33305e-06	1.1787e-05	7.42172e-06	1.23741e-05	5.61327e-06	0.00657199	0.0255795	0.000171479	0.00165961	0	0.000263032	0.00689628	0	0.000495572	0.000176305	0	0.0107743	0.000640881	0.00246395	8.81527e-05	0.00349182	0.00495997	0.00717502	0.00970191	2.68319e-05	2.79222e-05	2.73771e-05	7.70931e-07
674	C7H11NO4H	174.076	9.18664e-06	3.23892e-05	1.84794e-05	2.25997e-06	4.79619e-06	3.64229e-06	1.17923e-05	1.16788e-05	7.52691e-06	9.18025e-06	0.0042268	0.00245581	3.86509e-05	0.00161104	0	5.84198e-05	0.00322777	0.000462004	7.41971e-05	0.000177455	0	0.00224042	0.000556488	0.00125466	8.87277e-05	0.00103507	0.000935538	0.00203164	0.00194532	1.95899e-05	1.34868e-05	1.65384e-05	4.31555e-06
675	C8H15NO3H	174.112	0.000289217	0.000598199	0.000172545	0.000116958	1.77636e-05	1.51517e-05	0.000201639	0.000219788	0.000123344	0.000145303	0.00561063	0.0015217	6.44104e-05	0.0020412	0.00103189	0.000892146	0.00510438	0.000227669	8.77975e-05	0.00180012	0	0.00239891	0.00132175	0.00180662	0.00090006	0.00160683	0.000645008	0.00260488	0.00251852	7.15837e-05	4.33488e-05	5.74662e-05	1.99651e-05
676	C12H15NH	174.128	0.000994922	0.00159227	0.000652702	0.000250865	9.61767e-06	1.28629e-05	0.000585541	0.000625663	0.000336257	0.000448348	0.0161754	0.00476395	7.51146e-06	0.0317371	0.00878752	0.00180916	0.0426327	0	0.000145161	0.0184389	4.68494e-05	0.00698228	0.0141113	0.0142593	0.00924286	0.0111489	0.00362602	0.0135714	0.0149494	2.40908e-05	1.91085e-05	2.15996e-05	3.52302e-06
677	C9H19NO2H	174.149	0.000281128	0.000484427	0.000141631	0.000145152	1.71626e-05	1.77255e-05	0.000181204	0.000178005	0.000124365	0.000116512	0.0253042	0.0078103	2.85549e-06	0.0403678	0.00950289	0.00201818	0.0659366	0	0.000251015	0.0268698	6.41024e-05	0.0110391	0.0172963	0.0220625	0.0134669	0.0159662	0.00481169	0.0206854	0.0230246	2.59872e-05	2.68374e-05	2.64123e-05	6.01143e-07
678	C6H6O6H	175.024	0	0	0	3.9916e-08	1.26106e-06	1.94533e-06	5.41051e-07	8.50854e-07	5.12351e-07	7.54566e-07	0.000851098	0.00058641	0.000122923	0.000327667	0	0.00110906	0.000348136	0.000928194	8.60804e-05	0	0	0.000520144	0.000478908	0.000454137	0	0.000363297	0.000243723	0.000496894	0.000368196	0	2.86756e-05	1.43378e-05	2.02767e-05
679	C10H6O3H	175.039	2.31729e-06	0	2.00103e-05	9.35076e-06	3.49009e-06	7.45444e-06	7.10381e-06	7.18586e-06	9.55649e-06	6.24154e-06	0.205469	0.0180072	0.000252429	0.0160285	0.00283044	0.00280948	0.0219432	0.00193194	0.000446592	0.000396792	0.000846751	0.0745764	0.00722279	0.00810723	0.000621771	0.022632	0.0347902	0.0549521	0.08898	0	0.000206625	0.000103312	0.000146106
680	C7H10O5H	175.06	5.80314e-05	9.58451e-05	0.000188099	0.000203958	1.63559e-05	5.20091e-05	0.000102383	7.6958e-05	0.000139225	8.59339e-05	0.0331786	0.00745693	0.000370503	0.0114751	0	0.00374013	0.0302122	0.00256523	0.00043803	0.00104245	3.64099e-05	0.0136687	0.00507174	0.0110718	0.000539429	0.00758792	0.00591962	0.0144924	0.0158005	0.000132709	0.000166883	0.000149796	2.41649e-05
681	C11H10O2H	175.075	0.000208618	0.000592041	0.00174952	0.00132938	2.92282e-05	0.000248391	0.000692863	0.000693441	0.000974936	0.000701073	0.325347	0.0381755	0.000398454	0.0319073	0	0.014649	0.0766792	0.00681509	0.000633765	0	0	0.121307	0.0155188	0.0280427	0	0.0412171	0.0546113	0.0957718	0.139533	0.00186596	0.00135397	0.00160996	0.000362034
682	C8H14O4H	175.096	0.000288179	0.00104869	0.000552381	0.000421545	0.000116323	0.000137704	0.000427471	0.000346911	0.000379745	0.000221074	0.0544989	0.0109712	0.000629491	0.0239733	0.00701215	0.00681439	0.0345244	0.00525706	0.000864154	0.00149484	0	0.0220332	0.0126	0.0135486	0.000747422	0.0122323	0.00875267	0.0216289	0.023149	0.000399007	0.000326518	0.000362763	5.12574e-05
683	C12H14OH	175.112	0.00358119	0.0103033	0.000764205	0.000598616	0.000119323	5.80073e-05	0.00257078	0.00400725	0.000998859	0.0026271	0.397266	0.0886937	0.00058211	0.236082	0.0433462	0.016353	0.404101	0.00756252	0.00113001	0.0789216	0.00127952	0.16218	0.0985938	0.137598	0.0401006	0.109618	0.0532287	0.184664	0.192401	0.000165429	0.000363452	0.00026444	0.000140024
684	C9H18O3H	175.133	0.00765406	0.0127352	0.00353786	0.00334708	0.000415851	0.000245267	0.00465588	0.00478871	0.00300309	0.00315547	0.46134	0.160177	0.0016535	0.564139	0.195189	0.0525131	0.764475	0.0138371	0.00652306	0.161466	0.0015671	0.207724	0.270614	0.261612	0.0815164	0.205366	0.0871112	0.287886	0.284313	0.000395897	0.000506128	0.000451012	7.79448e-05
685	C13H18H	175.148	0.025272	0.0442228	0.0129331	0.0142009	0.00108631	0.000237015	0.0163253	0.0165251	0.0114583	0.0108355	2.25545	0.942801	0.00588074	4.33577	1.14156	0.238431	6.69109	0.0227241	0.0274295	2.68575	0.00184208	1.06804	1.90525	2.24708	1.3438	1.64104	0.533472	2.06438	2.30255	0.000271697	0.000826339	0.000549018	0.000392191
686	C10H22SH	175.151	0.0317468	0.0532621	0.0133284	0.0108372	0.000809967	0.000240105	0.0183708	0.0205699	0.010663	0.0136953	2.46293	0.708398	0.00528574	1.50688	0.646183	0.152497	5.30509	0.0179132	0.0296569	1.46643	0.00631884	1.05887	0.768519	1.78422	0.736374	1.087	0.486921	1.68335	1.90853	0.000411755	0.000965489	0.000688622	0.000391549
687	C10H22O2H	175.169	7.65862e-05	0.000285483	0.000283345	0.000396224	0.000114718	6.89369e-05	0.000204215	0.000135892	0.000266033	0.000147361	0.017462	0.0272213	0.000664126	0.361299	0.0466252	0.0120471	0.0115913	0.00309506	0.000800325	0	0.000650495	0.0151158	0.13999	0.00516223	0.000325247	0.0401484	0.0668455	0.0223708	0.0611734	0.000126767	0.000136109	0.000131438	6.60626e-06
688	C9H3O4H	176.01	2.3916e-05	6.10527e-05	1.15031e-05	1.13231e-05	3.99849e-06	1.08016e-06	1.88123e-05	2.21526e-05	1.12589e-05	1.40569e-05	5.41767e-05	0	6.91627e-06	0.000184624	6.28315e-05	6.25091e-05	0.000794189	0	3.67607e-05	0.000193702	0	2.03643e-05	0.000103321	0.000276983	9.68512e-05	0.00012438	0.000108487	0.000159257	0.000281325	0	6.88644e-07	3.44322e-07	4.86945e-07
689	C5H5NO6H	176.019	1.17834e-06	9.80081e-07	3.06692e-07	2.08388e-06	1.04413e-06	1.19596e-06	1.13151e-06	5.69957e-07	1.36978e-06	7.19959e-07	0.000723772	0.000106418	2.20649e-05	0.000221086	1.58147e-05	8.5095e-06	0.000144174	0	0	0.000135513	4.64895e-05	0.000284085	8.18035e-05	4.80579e-05	9.10011e-05	0.000126237	0.000106839	0.00022876	0.000295278	0	2.3877e-06	1.19385e-06	1.68836e-06
690	C9H5O3NH	176.034	8.24045e-06	2.12274e-05	1.04924e-05	8.99413e-06	2.32575e-06	2.91488e-06	9.0325e-06	6.83932e-06	7.83867e-06	4.45538e-06	0.00703823	0.000507618	5.96546e-05	0.00182298	0	0	0.00238855	0.000218749	2.71775e-05	0.000395783	7.67143e-05	0.00253517	0.000607659	0.00087816	0.000236249	0.00106431	0.00101526	0.00220361	0.00298924	1.69613e-05	2.32557e-05	2.01085e-05	4.45082e-06
691	C6H9NO5H	176.055	6.93349e-06	6.46807e-06	1.38703e-05	4.43422e-06	2.71374e-06	5.96666e-06	6.73107e-06	3.82301e-06	6.37395e-06	3.81642e-06	0.00937564	0.00189052	0.000275827	0.00437413	0	0.000140763	0.00788276	0.000528618	0.00025592	0.000470998	0.000162456	0.00384733	0.00150496	0.0028891	0.000316727	0.00213953	0.00154959	0.00399605	0.00433119	3.65843e-05	3.54099e-05	3.59971e-05	8.30434e-07
692	C10H9O2NH	176.071	1.20015e-05	2.80834e-05	3.91519e-05	3.60031e-05	7.79249e-06	1.16218e-05	2.24424e-05	1.36795e-05	2.74026e-05	1.36907e-05	0.0181433	0.00346138	0.000475886	0.00503655	0	0	0.014053	0.000955156	0.000290186	6.93459e-05	2.24087e-05	0.0073602	0.00167885	0.00509946	4.58773e-05	0.0035461	0.00330144	0.00731367	0.00840762	5.45786e-05	2.58857e-05	4.02322e-05	2.02889e-05
693	C7H13NO4H	176.092	4.59287e-05	7.71706e-05	7.37029e-05	3.8981e-05	7.21262e-06	1.38854e-05	4.28135e-05	2.92001e-05	3.87543e-05	2.38118e-05	0.00538936	0.000789249	0	0.00227291	9.86179e-05	0.000351361	0.00498349	0.000340304	7.76616e-05	0.000216911	5.37758e-06	0.00205954	0.000907629	0.00180049	0.000111144	0.0012197	0.000888617	0.0022933	0.00260271	5.85175e-05	3.01521e-05	4.43348e-05	2.00574e-05
694	C11H13NOH	176.107	0.000151288	0.000248162	7.85099e-05	4.90076e-05	7.56807e-06	6.08351e-06	9.01031e-05	9.42557e-05	5.36387e-05	6.42111e-05	0.00217625	0.000359495	0.000118787	0.0021389	0.000786686	0.000305831	0.00413053	0.000190334	0.000107058	0.00132668	6.16295e-05	0.000884845	0.00107714	0.00147597	0.000694156	0.00103303	0.000334135	0.00142141	0.00147948	3.79778e-05	2.56239e-05	3.18009e-05	8.73554e-06
695	C8H17NO3H	176.128	0.000180139	0.000390369	0.000120131	0.000119203	9.45987e-06	6.01159e-06	0.000137552	0.000141478	9.89675e-05	9.13235e-05	0.0129914	0.00401702	3.95164e-05	0.0215058	0.00623854	0.00152712	0.0260324	8.20079e-05	0.00020747	0.00756454	0	0.00568265	0.00975716	0.00877396	0.00378227	0.00699901	0.00275911	0.00905899	0.00937742	6.50137e-05	4.50176e-05	5.50157e-05	1.41394e-05
696	C12H17NH	176.143	0.000464162	0.000797961	0.00025863	0.000246594	2.11149e-05	1.11709e-05	0.000299939	0.000296876	0.000209022	0.000195959	0.0381735	0.0132475	7.43126e-05	0.0353706	0.0152601	0.00342019	0.08293	0.000415301	0.000518458	0.0268576	0	0.0171651	0.018017	0.0279546	0.0134288	0.0191414	0.0062042	0.0273399	0.0292234	4.1295e-05	2.99069e-05	3.56009e-05	8.05263e-06
697	C13H20	176.156	0.000314657	0.000493168	0.00014493	0.000174051	2.42019e-05	1.13802e-05	0.000193731	0.000183873	0.000138783	0.000121123	0.0201244	0.00682375	0.000114818	0.0101703	0.0106463	0.00328947	0.0479304	0.000264802	0.000776114	0.019226	0.00020704	0.00902098	0.00803536	0.0163238	0.00971651	0.0107742	0.00376349	0.0152595	0.0167094	2.92237e-05	2.80718e-05	2.86478e-05	8.14475e-07
698	C9H4O4H	177.018	1.08457e-05	4.2931e-06	1.31633e-05	3.9953e-05	3.50351e-05	5.60842e-05	2.65624e-05	2.02243e-05	3.40907e-05	1.69106e-05	0.0215641	0.000216541	0.000144908	0.000219175	0	0	0	0.000878639	4.05398e-05	0	0.000436948	0.00730851	7.30582e-05	0.000306393	0.000218474	0.00197661	0.0035559	0.00517323	0.00953885	4.07027e-05	2.21256e-05	3.14141e-05	1.3136e-05
699	C6H8O6H	177.039	7.85503e-06	2.15277e-06	2.08679e-05	6.31361e-05	1.6757e-05	3.57824e-05	2.44252e-05	2.22243e-05	3.92685e-05	2.64361e-05	0.0633669	0.00995573	0.00049251	0.0164828	0	0	0.028714	0.00126687	0.000864706	0.000578452	0	0.024605	0.00549426	0.0102819	0.000289226	0.0101676	0.0104543	0.0216177	0.0273129	0.000157573	0.000167984	0.000162779	7.36218e-06
700	C10H8O3H	177.055	0	0	3.73185e-05	0.000189909	8.29809e-06	7.9094e-05	5.24365e-05	7.38717e-05	0.000101341	9.3234e-05	0.341129	0.210675	0.00445646	0.0603323	0.0652718	0	0.17405	0.00745194	0.00584297	0.00691058	0.000389394	0.18542	0.041868	0.0624482	0.00364999	0.0733466	0.078587	0.148105	0.152534	0.000169093	0.000483711	0.000326402	0.000222469
701	C7H12O5H	177.076	0.000206961	0.00031969	0.000261845	0.000457486	1.77714e-05	5.73502e-05	0.000220184	0.000164688	0.000276645	0.000187461	0.256951	0.0542394	0.000368524	0.0833721	0.00402912	0.0143402	0.206854	0.00759345	0.00119928	0.0106264	1.3271e-05	0.103853	0.0339138	0.0718824	0.00531985	0.0537423	0.0431202	0.105558	0.119322	0.000569782	0.000738234	0.000654008	0.000119113
702	C7H14NO4H	177.1	0.000122937	0.000561208	0.000373899	0.000216713	3.68589e-05	6.94543e-05	0.000230178	0.000202545	0.000208885	0.000138071	0.332898	0.0468862	0.000206059	0.0820092	0	0.0232535	0.163572	0.00731047	0.000569623	0.00318137	0	0.126663	0.0350876	0.0571506	0.00159068	0.055123	0.0528812	0.114411	0.144258	0.00104071	0.00111575	0.00107823	5.30645e-05
703	C8H16O4H	177.112	0.00047978	0.000936992	0.000186653	0.000290755	7.96901e-05	8.28246e-05	0.000342782	0.000327332	0.000240888	0.00020831	0.00495822	0.00347534	0.000439288	0.00437232	0.00247412	0.00115223	0.0845221	0.00162648	0.000603366	0.0272251	0	0.00295762	0.00266622	0.0289173	0.0136125	0.0120384	0.0123514	0.0172366	0.0301418	4.91287e-06	1.95309e-05	1.22219e-05	1.03365e-05
704	C12H16OH	177.127	0.00417511	0.0105269	0.00112306	0.00128018	0.000179527	3.71367e-05	0.00288699	0.00402922	0.00139102	0.00259909	0.215051	0.0704604	0.000348221	0.210585	0.0799569	0.0147693	0.259491	0.00199344	0.00114335	0.0312897	0.000822315	0.0952867	0.10177	0.0875426	0.016056	0.0751639	0.0398322	0.112947	0.110646	0	4.44413e-05	2.22206e-05	3.14247e-05
705	C9H20O3H	177.149	0.000683539	0.00124913	0.000906956	0.000903733	0.000306851	0.000208946	0.000709859	0.000395289	0.000713722	0.000316798	0.0227169	0.0233363	0.00391507	0.168873	0.0573877	0.0308109	0.0149127	0.00653358	0.000777315	0	0.00197094	0.0166561	0.0856906	0.00740786	0.000985472	0.027685	0.0392017	0.0191851	0.0289764	0	1.84938e-05	9.24692e-06	1.30771e-05
706	C13H20H	177.164	0.0499805	0.0673394	0.0248084	0.0198606	0.00261498	0.00104992	0.027609	0.0263703	0.0182751	0.0178482	2.94377	1.09847	0.0754083	3.4591	1.72514	0.486561	7.34443	0.0612669	0.122861	2.13574	0.156778	1.37255	1.89027	2.50952	1.14626	1.72965	0.606043	2.33332	2.51081	0.000790345	0.00132788	0.00105911	0.000380098
707	C9H7NOSH	178.032	4.08369e-05	0.000125313	1.90333e-05	9.79769e-06	4.10921e-06	1.95781e-06	3.35081e-05	4.71452e-05	1.56009e-05	3.07758e-05	0.00839833	0.00121111	4.62299e-05	0.00296499	0.000692442	4.07195e-05	0.00611734	0	0.000302372	0.000666248	0.000225716	0.00321856	0.00123272	0.0021399	0.000445982	0.00175929	0.00119393	0.00328865	0.00377391	1.89271e-05	1.79359e-05	1.84315e-05	7.00918e-07
708	C9H7NO3H	178.05	0.000124437	0.000454702	2.27841e-05	1.42233e-05	2.90629e-06	6.29214e-06	0.000104224	0.000177669	3.60125e-05	0.000115399	0.0322086	0.00553324	0.000274682	0.00622259	0.00159741	0.00033908	0.00615416	0.000299208	0.000250298	0	0	0.0126722	0.00271969	0.00223455	0	0.0044066	0.00563623	0.00965558	0.0136537	3.24397e-05	4.69834e-05	3.97116e-05	1.02839e-05
709	C6H11NO5H	178.071	2.12565e-05	9.5708e-05	3.93354e-05	3.37884e-05	9.31694e-06	1.79134e-05	3.62198e-05	3.11039e-05	3.10247e-05	1.82737e-05	0.00168641	0.000727861	5.50706e-05	0.0014011	1.9154e-05	0	0.00448243	1.93096e-05	0.000118018	0.00101553	0.000138752	0.000823113	0.000473418	0.00153992	0.000577143	0.000853398	0.0004806	0.00134833	0.00156698	4.13226e-05	4.02325e-05	4.07776e-05	7.70874e-07
710	C7H15NO4H	178.107	5.43168e-05	0.000173441	0.000113964	8.1061e-05	1.46869e-05	3.38772e-05	7.85579e-05	5.81829e-05	7.31556e-05	4.00448e-05	0.0208405	0.0031795	3.30297e-05	0.00855053	0.000205592	0.00106026	0.0154855	8.77315e-05	6.21846e-05	0.00128222	0	0.00801768	0.00327213	0.00521179	0.000641111	0.00428568	0.00311425	0.00815461	0.00950707	8.93248e-05	7.10065e-05	8.01657e-05	1.2953e-05
711	C11H15NOH	178.123	7.00366e-05	0.000175796	5.79013e-05	3.9905e-05	7.36137e-06	6.57653e-06	5.95961e-05	6.25164e-05	4.01841e-05	4.03989e-05	0.0020056	0.000794958	0	0.00180435	0.000797522	0.000172039	0.00673078	0	6.27768e-05	0.00206264	7.67475e-05	0.000933518	0.000924637	0.00226452	0.0010697	0.00129809	0.000647695	0.00187134	0.00231553	6.54868e-06	4.76897e-06	5.65882e-06	1.25845e-06
712	C12H19NH	178.159	0.000254707	0.000458739	0.000171365	0.000271292	2.3541e-05	2.63832e-05	0.000201004	0.000165599	0.000184027	0.000122147	0.00592736	0.00388794	0.000988898	0.00627292	0.00507347	0.00374871	0.0165885	0.000841667	0.000873368	0.00847378	0.00156886	0.0036014	0.0050317	0.00610118	0.00502132	0.0049389	0.00102554	0.00585262	0.0052321	4.09833e-05	2.57839e-05	3.33836e-05	1.07476e-05
713	C6Cl3HH	178.922	4.12387e-05	4.317e-05	1.15635e-06	1.02602e-06	1.67307e-05	5.65457e-06	1.81627e-05	1.94897e-05	7.29526e-06	1.57688e-05	1.43461e-06	0	0	0.000199556	0	0	0.00582063	0	0	0	0	4.78203e-07	6.65186e-05	0.00194021	0	0.000501802	0.000959448	0.000919758	0.00215615	0	0	0	0
714	C9H6O2SH	179.016	0.000269315	0.000538993	0.00020768	0.000317478	7.30256e-05	6.42257e-05	0.00024512	0.000176592	0.000228135	0.000126602	0.000706434	5.17859e-05	0.00045462	8.09348e-05	0	0	0.00199332	1.62407e-05	0.000243732	0	0	0.00040428	2.69783e-05	0.000751099	0	0.000295589	0.000355353	0.000535228	0.000727324	5.03283e-05	3.95293e-05	4.49288e-05	7.63603e-06
715	C9H6O4H	179.034	9.65734e-06	1.20266e-05	6.96371e-06	0	9.48559e-06	3.24192e-06	6.89586e-06	4.50701e-06	4.12738e-06	4.97224e-06	0.049792	0.00113472	0	0.00251068	0	0.000389221	0.0113208	0	0.000731386	0	0	0.0169756	0.000966633	0.00401739	0	0.0054899	0.00784618	0.0135883	0.0217761	2.12442e-05	3.79356e-05	2.95899e-05	1.18026e-05
716	C10H10O3H	179.07	0.000154074	0.000311324	0.000492529	0.000239973	7.71552e-05	0.000179183	0.000242373	0.000145894	0.000254298	0.00013129	0.103136	0.00810625	0	0.0190843	0	0.00326685	0.0395419	0.000578031	0.000282127	0	0	0.0370807	0.00745037	0.0134674	0	0.0144996	0.0160302	0.0320977	0.0447648	0.000536065	0.000393454	0.00046476	0.000100841
717	C14H10H	179.086	0.00518618	0.0132977	0.00202194	0.000744451	0.000425462	0.000788871	0.0037441	0.00500123	0.00164418	0.0034075	0.0673669	0.0292914	0.000350231	0.0231133	0.00176668	0.00855499	0.090504	0.00226254	0.00038596	0.00244102	0.000400089	0.0323362	0.011145	0.0310508	0.00142055	0.0189881	0.0152076	0.036161	0.0385808	0.000370636	0.000510843	0.00044074	9.91413e-05
718	C7H14O5H	179.091	0.00390213	0.00836107	0.00118611	0.000573935	0.000285213	0.000461389	0.00246164	0.00318768	0.00107913	0.00219171	0.0146268	0.00934842	0.000869831	0	0	0	0.0389818	0.00440539	0.000122278	0	0	0.00828167	0	0.0145032	0	0.00569621	0.00705078	0.0117296	0.0142994	1.72576e-05	0.000273089	0.000145173	0.0001809
719	C11H14O2H	179.107	0.00480981	0.00727948	0.00800744	0.0093833	0.0084964	0.0138845	0.00864349	0.00299997	0.00944704	0.00225426	0.179134	0.0464984	0.00582977	0.0666567	0.0160553	0.0208455	0.158305	0.0529503	0.011319	0.0412633	0.0316201	0.0771542	0.0345191	0.0741914	0.0364417	0.0555766	0.0232498	0.0889723	0.0747119	0.00508289	0.00522796	0.00515543	0.000102583
720	C8H18O4H	179.128	0.000301394	0.00051933	0.000485908	0.000501748	0.000332588	0.000575866	0.000452806	0.000109944	0.000478819	8.17731e-05	0.0188357	0.00259136	0	0.000471784	0	0	0.0587515	0.000355205	0	0.032074	0.000124203	0.00714234	0.000157261	0.0197022	0.0160991	0.0107752	0.00883127	0.0161775	0.021434	0.00023872	0.000208303	0.000223512	2.15083e-05
721	C12H18OH	179.143	0.000185248	0.000237942	0.000154901	0.000159404	9.74961e-05	0.000146629	0.000163603	4.63602e-05	0.000151315	3.16923e-05	0.297231	0.0602541	0.00327008	0.223578	0.0605733	0.031326	0.381511	0.00333496	0.000592111	0.0460421	0.00208204	0.120252	0.105159	0.128479	0.0240621	0.094488	0.0479335	0.150784	0.161114	0.000149621	0.00014901	0.000149316	4.31951e-07
722	C13H22H	179.179	0.00995828	0.00712756	0.00570696	0.00778418	0.0013768	0.000814101	0.00546131	0.00365335	0.00535629	0.00299175	2.31883	0.958322	0.256331	2.14036	1.33936	0.909912	5.14333	0.165159	0.298945	1.66339	0.65562	1.17783	1.46321	1.86915	1.1595	1.41742	0.331702	1.81603	1.6777	0.00112025	0.00177774	0.001449	0.000464914
723	C6H3Cl3	179.929	4.28415e-05	5.49122e-05	1.09848e-05	8.9421e-06	1.37725e-05	0	2.19088e-05	2.17305e-05	1.17826e-05	1.55177e-05	0	0	0	0.000485522	7.60851e-05	0.000119285	0.00418424	0	8.48057e-05	0	0	0	0.000226964	0.00142302	0	0.000412495	0.000682124	0.000677508	0.00153856	0	0	0	0
724	C9H9NO3H	180.066	4.7668e-05	0.000241745	0.000129339	7.21535e-05	1.68217e-05	3.43821e-05	9.03515e-05	8.38239e-05	7.55885e-05	5.32582e-05	0.0614163	0.0118336	0.000128785	0.0245376	0.0108117	0.000777563	0.0280702	0.000648935	0.000178807	0.006841	0.000957402	0.0244595	0.0120423	0.00963264	0.0038992	0.0125084	0.00866863	0.0222043	0.0253595	1.14485e-05	6.13747e-05	3.64116e-05	3.53032e-05
725	C14H11H	180.093	0.0002436	0.000622101	0.000215088	0.000110782	4.00614e-05	6.52528e-05	0.000216148	0.000214677	0.000139738	0.000143057	0.00231457	0.00301534	1.80629e-05	0.00304998	0	0	0.00644312	0.000536901	0.000373451	0.000819571	0.000245886	0.00178266	0.00101666	0.00245116	0.000532729	0.0014458	0.000845001	0.0023137	0.00225744	1.56335e-05	4.09368e-05	2.82852e-05	1.78921e-05
726	C10H13NO2H	180.102	3.39299e-05	9.09552e-05	9.73749e-05	6.36189e-05	3.77446e-05	5.95214e-05	6.38575e-05	2.62835e-05	6.57751e-05	1.95644e-05	0.00478939	0.00377565	9.25508e-05	0.00258605	0.000289609	0.000292482	0.00638534	0.00049233	0.000174479	0.000899408	0.000232815	0.00288586	0.00105605	0.00235072	0.000566112	0.00171468	0.00108462	0.00299992	0.00266914	7.22717e-05	4.05089e-05	5.63903e-05	2.24597e-05
727	C11H17NOH	180.138	0.000255444	0.000612937	0.000212894	0.000180248	3.37862e-05	2.78943e-05	0.000220534	0.000213946	0.000162043	0.00013707	0.0083607	0.00279258	0.000183779	0.00897035	0.00317265	0.00128135	0.0151258	0.000308431	0.0002648	0.00468277	0.00118403	0.00377902	0.00447478	0.00523301	0.0029334	0.00410505	0.000981168	0.00557808	0.00534012	2.85118e-05	1.93591e-05	2.39355e-05	6.47193e-06
728	C6H3Cl3H	180.937	0.000121317	0.000150845	2.33806e-05	0	1.00973e-05	0	5.09399e-05	6.71584e-05	1.64533e-05	5.00425e-05	0.00107962	0	0	0.00196347	0	0.000287307	0	0.000226686	0	0	0	0.000359874	0.000750259	7.5562e-05	0	0.000296424	0.000339921	0.000333931	0.000523402	0	6.90482e-06	3.45241e-06	4.88245e-06
729	C7H4ClF3H	181.003	2.42172e-05	0.000242203	0.000300446	0.000613011	0.000276202	0.000328204	0.00029738	0.000189047	0.000422921	0.000211974	0.00657382	0.00193003	0.00327747	0.000130125	0.000281582	0	0.0030097	0.00441937	0.000370625	0	0	0.00392711	0.000137236	0.0025999	0	0.00166606	0.00192332	0.00312564	0.00274693	0.000251488	0.000202985	0.000227237	3.42968e-05
730	C9H8SO2H	181.032	5.15493e-06	2.14625e-05	3.58134e-05	4.47794e-05	3.43307e-05	2.27038e-05	2.73741e-05	1.395e-05	3.58039e-05	1.30224e-05	0.00680239	0.00119409	0.000536687	0.000764486	0.000908306	0	0	0.000257479	0	0	0	0.00284439	0.000557597	8.58264e-05	0	0.000871953	0.00133761	0.00189206	0.00290911	9.78011e-06	1.33128e-05	1.15465e-05	2.498e-06
731	C9H8O4H	181.05	3.48216e-05	3.81683e-05	7.21304e-05	2.75585e-05	2.43092e-05	2.51492e-05	3.70229e-05	1.80604e-05	3.58928e-05	1.79009e-05	0.0210987	0.00470785	0.000101959	0.00251599	0.000357244	0.000117844	0.00777618	0.000676312	0.000404543	0.000238314	0.000885882	0.00863616	0.000997025	0.00295235	0.000562098	0.00328691	0.00371459	0.00718365	0.00894901	0	3.21179e-05	1.60589e-05	2.27108e-05
732	C10H12O3H	181.086	0.000292949	0.00199966	0.000806429	0.000441296	6.97557e-05	0.000207596	0.000636281	0.000713914	0.000483203	0.000432261	0.0922542	0.0215278	0.000583354	0.0285923	0	0.00357131	0.0735041	0.00393001	0.00206468	0	0	0.0381218	0.0107212	0.0264996	0	0.0188356	0.0168455	0.038065	0.0429099	0.000435143	0.000418746	0.000426945	1.15942e-05
733	C14H12H	181.101	0.00341937	0.00645447	0.000748925	0.000268942	3.90043e-05	7.32335e-05	0.00183399	0.00260043	0.000667718	0.00181073	0.0548595	0.0260095	0.000182049	0.0541534	0.00402995	0.00643311	0.0996983	0.00101894	1.64255e-05	0.00468082	0	0.027017	0.0215388	0.0335779	0.00234041	0.0211185	0.0134514	0.0349795	0.0377769	0.000179752	0.000479186	0.000329469	0.000211732
734	C11H16SH	181.105	0.00498124	0.0103849	0.0011066	0.000448653	5.22759e-05	8.76352e-05	0.00284355	0.00413716	0.00104041	0.00284383	0.0412137	0.0282658	0.000287032	0.0538944	0.00704154	0.00834985	0.128951	0.00335306	0.000481846	0.0175973	0.000335905	0.0232555	0.0230953	0.0442619	0.00896662	0.0248948	0.0145455	0.0380629	0.044407	0.000198727	0.000549583	0.000374155	0.000248093
735	C11H16O2H	181.122	0.000136629	0.000427742	0.000248881	0.000162947	3.49566e-05	2.43818e-05	0.00017259	0.000150478	0.000149304	0.000102176	0.284478	0.0461761	0.000389817	0.107687	0.0151708	0.0179407	0.270867	0.00557456	0.000902812	0.0313339	0	0.110348	0.0469328	0.0924482	0.0156669	0.0663489	0.0430609	0.122606	0.138272	0.00147527	0.00117455	0.00132491	0.000212644
736	C12H20OH	181.159	0.000448222	0.000610168	0.000256008	0.00048908	0.000101005	4.32621e-05	0.000324624	0.00022704	0.00031995	0.000190992	0.398056	0.0962894	0.00111433	0.320107	0.0742565	0.0295124	0.651515	0.0084129	0.00240375	0.148541	0.00140376	0.165153	0.141292	0.220777	0.0749726	0.150549	0.0603953	0.232909	0.248685	0.000241517	0.000301373	0.000271445	4.23247e-05
737	C13H24H	181.195	0.00220856	0.00374656	0.00395631	0.004716	0.000624063	0.000581413	0.00263882	0.0017751	0.00318105	0.00187275	0.665622	0.281295	0.0321598	0.622397	0.277471	0.165432	1.62785	0.0506649	0.0506883	0.327051	0.0939727	0.326359	0.3551	0.576403	0.210512	0.367093	0.152896	0.522358	0.551675	0.00113041	0.00200846	0.00156943	0.000620879
738	C8H7NO4H	182.045	1.51442e-05	2.39906e-05	3.38762e-05	9.6345e-06	7.63625e-06	8.36815e-06	1.64417e-05	1.05042e-05	1.45716e-05	1.012e-05	0.0743091	0.0164677	0.000172659	0.00163567	0	0	0.0119806	0.00135919	0.000790493	0	0.000237745	0.0303165	0.000545225	0.0047101	0.000118873	0.00892267	0.0144121	0.0222047	0.0320817	0.000125781	0.000135581	0.000130681	6.92934e-06
739	C9H11NO3H	182.081	0.000825374	0.00283458	0.000258403	0.000212711	3.1268e-05	6.14933e-05	0.000703971	0.00108253	0.000306406	0.000692024	0.0512263	0.0171336	0.000175218	0.0365102	0.0111371	0.000718676	0.0535598	0.00109704	0.000608161	0.0104625	0.000113636	0.022845	0.016122	0.0184217	0.00528806	0.0156692	0.00746195	0.0253763	0.0246077	5.83012e-05	7.13596e-05	6.48304e-05	9.23365e-06
740	C10H15NO2H	182.118	0.000304122	0.000588657	0.000222348	0.000180129	1.77332e-05	2.67649e-05	0.000223292	0.000211076	0.000161511	0.000139609	0.0115841	0.00451481	4.13607e-05	0.0177676	0.00156053	0	0.0271608	0.000304133	0.000108135	0.00564374	0.000141923	0.00538009	0.00644271	0.00919101	0.00289283	0.00597666	0.00260865	0.00868352	0.00965843	6.26124e-06	3.39421e-05	2.01017e-05	1.95733e-05
741	C11H19NOH	182.154	3.22757e-05	3.89812e-05	2.58032e-05	5.86742e-05	3.80316e-06	3.75835e-06	2.7216e-05	2.12323e-05	3.37556e-05	2.44473e-05	0.00296467	0.00117117	2.90932e-06	0.00335297	0.00127397	0.000430042	0.00622781	0	6.65333e-05	0.00163598	6.61637e-05	0.00137958	0.00168566	0.00209812	0.000851073	0.00150361	0.000525283	0.00210785	0.00219281	1.5354e-05	1.11988e-05	1.32764e-05	2.93819e-06
742	C12H23NH	182.19	0.000569833	0.000330022	0.000150932	0.00047954	1.11374e-05	6.86951e-06	0.000258056	0.000239574	0.00026736	0.000212972	0.00455198	0.0028685	0.000306985	0.00541055	0.00601983	0.00155858	0.0100178	0.00053431	0.000317968	0.0022369	0.000316043	0.00257582	0.00432965	0.00362335	0.00127647	0.00295132	0.00132885	0.00369396	0.00330233	2.08227e-05	1.45055e-05	1.76641e-05	4.46696e-06
743	C12H6O2H	183.044	0	0	6.3527e-06	0	1.63168e-05	0	3.77825e-06	6.64747e-06	3.73432e-06	5.90753e-06	0.00273711	0.000139288	1.26125e-05	0	0	0	0	0.000402548	0.000510726	0	0.000300106	0.000963005	0	0.000304425	0.000150053	0.000354371	0.000424364	0.000752029	0.00116843	0	0	0	0
744	C9H10O4H	183.065	8.73669e-05	0.000145805	6.70491e-05	6.24459e-05	3.94023e-05	4.85998e-05	7.51115e-05	3.83438e-05	6.21245e-05	2.48112e-05	0.0100903	0.000697019	0.000421155	0	0	0	0.00108002	0.00127243	0.00140991	0.00212024	0.00102556	0.00373615	0	0.00125412	0.0015729	0.00164079	0.00155315	0.00308508	0.0041263	7.12118e-05	8.42476e-05	7.77297e-05	9.2177e-06
745	C13H10OH	183.08	0.00275808	0.00600901	0.00113295	0.000744185	0.00010419	0.000460807	0.0018682	0.00222866	0.000973111	0.00149075	0.107948	0.0340289	0.000477928	0.0448966	0.000648149	0.00440634	0.130103	0.00353445	0	0	2.68124e-05	0.0474851	0.0166504	0.0445459	1.34062e-05	0.0271737	0.0228237	0.0530862	0.0588507	0.000162448	0.000446465	0.000304457	0.00020083
746	C10H14O3H	183.102	0.00106714	0.00145064	0.00150063	0.00120677	0.000273031	0.00055968	0.00100965	0.000494526	0.00102544	0.000431882	0.0931777	0.0320054	0.00124947	0.109742	0.0252569	0.00870208	0.0850088	0.00715153	0	0	0	0.0421442	0.0479002	0.0307201	0	0.0301911	0.0213563	0.0451216	0.0431795	0.000893168	0.000428645	0.000660906	0.000328468
747	C14H14H	183.117	0.0390598	0.0595853	0.0152129	0.0101975	0.000909067	0.000852847	0.0209696	0.0235572	0.0113649	0.0160395	0.738067	0.407857	0.00202483	1.2831	0.270258	0.0868366	2.25501	0.0186935	0.00614935	0.531483	0.00252462	0.382649	0.546732	0.759953	0.267004	0.489084	0.213963	0.675965	0.772968	0.00079572	0.00386605	0.00233088	0.00217105
748	C11H18O2H	183.138	0.000609268	0.00087851	0.00111161	0.000570212	0.000113039	0.000106683	0.000564887	0.000403331	0.000546415	0.000354357	0.336724	0.0785667	0.000680449	0.257618	0.040661	0.0236184	0.500957	0.0088213	0.00325819	0.091018	0.00177836	0.138657	0.107299	0.171012	0.0463982	0.115842	0.0531027	0.185807	0.198724	0.00108427	0.0011535	0.00111889	4.89535e-05
749	C12H22OH	183.174	0.000656064	0.00227956	0.000374216	0.000488674	0.000203967	9.43448e-05	0.000682804	0.000807319	0.000447513	0.000487735	0.357568	0.103274	0.00140105	0.375978	0.0883936	0.032103	0.711874	0.00651308	0.00242117	0.136436	0	0.154081	0.165492	0.240269	0.0682178	0.157015	0.0704668	0.235064	0.259141	0.000133677	0.000127043	0.00013036	4.69112e-06
750	C13H26H	183.211	0.0208565	0.0322186	0.0163927	0.016438	0.00197748	0.00101112	0.0148157	0.011831	0.0126544	0.00843946	0.702002	0.32529	0.0272251	0.696414	0.330351	0.159441	2.10112	0.0447714	0.0513469	0.450598	0.0831897	0.351506	0.395402	0.732412	0.266894	0.436554	0.204323	0.622188	0.709311	0.00141074	0.00232041	0.00186557	0.000643237
751	C7H5NO5H	184.024	5.47726e-06	2.34461e-05	2.56313e-05	2.98043e-05	4.49369e-06	6.43022e-06	1.58805e-05	1.1605e-05	2.04695e-05	1.1841e-05	0.0210251	0.000461537	5.19024e-06	0.000713546	0	0.000436249	0.0124238	0	0	0	0	0.00716393	0.000383265	0.00414128	0	0.00292212	0.00338939	0.00691239	0.00972326	3.19648e-05	5.33685e-05	4.26666e-05	1.51347e-05
752	C11H6NO2	184.039	2.41529e-06	4.30393e-06	3.5361e-06	9.52769e-06	1.2568e-06	2.97678e-06	4.00277e-06	2.89642e-06	5.64489e-06	3.79762e-06	0.00271126	0.000402478	4.91208e-05	0.000211124	0.00012187	0.000172649	0.000914866	0.000202276	0.000100432	0	3.19068e-05	0.00105429	0.000168548	0.000405858	1.59534e-05	0.000411161	0.00045778	0.000885476	0.00114289	0	1.19169e-05	5.95847e-06	8.42655e-06
753	C8H10NO4	184.06	3.33783e-05	3.59604e-05	5.72159e-05	2.46458e-05	1.73741e-05	1.99883e-05	3.14271e-05	1.45859e-05	2.97948e-05	1.40832e-05	0.00652552	0.000426857	0	0.00121324	0.000166096	0	0.00893135	0	5.88276e-05	0	0	0.00231746	0.000459779	0.00299672	0	0.00144349	0.0014408	0.00302488	0.00397304	8.54606e-05	2.84869e-05	5.69737e-05	4.02865e-05
754	C9H13NO3H	184.097	6.94752e-05	7.73187e-05	0.000104655	4.70383e-05	2.44886e-05	2.95345e-05	5.87517e-05	3.07624e-05	5.38905e-05	2.81601e-05	0.00776845	0.000522379	0	0.00892456	0.00182046	0.000674573	0.0182289	0	4.26132e-05	0.0014298	0.000134659	0.00276361	0.00380653	0.00609049	0.000782229	0.00336072	0.00221025	0.00514836	0.00672975	0.000103459	4.43239e-05	7.38914e-05	4.18148e-05
755	C13H14N	184.112	9.77154e-05	0.000204598	0.000121448	0.000121782	1.59115e-05	3.53651e-05	9.94701e-05	6.80107e-05	9.50148e-05	5.01488e-05	0.00630579	0.00245059	6.66575e-05	0.0080921	0.00142994	0.000644762	0.0154251	0.000351775	0.000326251	0.00308974	0.000589738	0.00294101	0.00338893	0.0053677	0.00183974	0.00338434	0.00147378	0.00487629	0.00534666	4.5997e-05	4.75426e-05	4.67698e-05	1.09291e-06
756	C10H17NO2H	184.133	9.24339e-05	0.000171134	7.47333e-05	7.50246e-05	1.02311e-05	2.33298e-05	7.44811e-05	5.72868e-05	6.18187e-05	3.83694e-05	0.00409848	0.000394792	5.03237e-05	0.0053619	0.0010952	0.000512673	0.0187093	0	9.55296e-05	0.00304651	0.000159008	0.00151453	0.00232326	0.00626829	0.00160276	0.00292721	0.00225665	0.0043497	0.00658838	5.20888e-05	4.01512e-05	4.612e-05	8.44117e-06
757	C11H21NOH	184.17	0.000109348	0.000155515	4.13823e-05	7.68278e-05	7.73601e-06	2.84631e-06	6.56092e-05	5.99956e-05	5.24694e-05	4.13859e-05	0.00278003	0.000302947	0	0.00488085	0.00173411	0.000608593	0.0127226	0	3.77353e-05	0.0020161	0.000167554	0.00102766	0.00240785	0.00425343	0.00109183	0.00219519	0.00151241	0.0030176	0.00444827	1.42291e-05	1.37968e-05	1.40129e-05	3.05641e-07
758	C12H25NH	184.206	0.000162688	0.000303179	0.00015753	0.000194592	2.01824e-05	8.58287e-06	0.000141126	0.000111399	0.000135758	8.62331e-05	0.00122687	0.000364034	3.29615e-05	0.00265838	0.00182539	0.00109944	0.0195205	0	0.000417473	0.00297299	0.000864707	0.00054129	0.00186107	0.006646	0.00191885	0.0027418	0.00267943	0.00381341	0.00690796	1.04416e-05	1.54215e-05	1.29316e-05	3.52133e-06
759	C6H4N2O5H	185.019	1.02142e-05	1.98672e-05	2.13444e-05	3.64013e-05	1.31169e-05	5.12597e-05	2.53673e-05	1.56095e-05	3.0694e-05	1.37786e-05	0.0116204	0.00189244	0.00200744	0	0	0	0.00180877	0	0.00051199	0	0	0.00517343	0	0.000773586	0	0.00148675	0.00248469	0.00347362	0.00495238	0	1.63833e-05	8.19164e-06	1.15847e-05
760	C8H9O5	185.044	9.34152e-05	0.000140834	1.22444e-05	4.08033e-06	8.23528e-06	3.5812e-06	4.37317e-05	5.88779e-05	1.50385e-05	4.24223e-05	0.00697681	0.00018885	0.00113308	0	0.0008177	0.00134423	0	7.03108e-05	0.000837538	0.000937638	0.000249934	0.00276625	0.000720642	0.000302616	0.000593786	0.00109582	0.00112728	0.00188731	0.00292199	0	0.000124307	6.21533e-05	8.7898e-05
761	C9H12O4H	185.081	0.000240091	0.000323989	0.000395874	0.000174765	0.000155624	0.00030705	0.000266232	9.28361e-05	0.000243153	9.53099e-05	0.102886	0.0220993	0.000401691	0.00781937	0	0	0.0510851	0.00509018	0	0	0	0.0417958	0.00260646	0.0187251	0	0.0157818	0.0192184	0.0365089	0.0451883	0.000155416	0.00019503	0.000175223	2.80114e-05
762	C10H16O3H	185.117	0.00122281	0.00210605	0.00168778	0.00134918	0.000682661	0.000947677	0.00133269	0.000511331	0.00127911	0.00037371	0.211556	0.0538051	0.00177648	0.0946004	0	0.0136064	0.192288	0.0168796	0	0	0	0.0890459	0.0360689	0.0697225	0	0.0487093	0.0391619	0.0933859	0.101053	0.00156878	0.00113986	0.00135432	0.000303292
763	C14H16H	185.132	0.0204915	0.0373788	0.0066164	0.00319677	0.000158147	0.000178143	0.0113366	0.0148325	0.00497111	0.0101976	0.42534	0.182793	0.000805237	0.667171	0.079479	0.0421639	1.51825	0.00922177	0.00190133	0.176792	0.000227127	0.202979	0.262938	0.50979	0.0885095	0.266054	0.177874	0.402175	0.530074	0.00026102	0.00195812	0.00110957	0.00120003
764	C11H20O2H	185.154	0.00130707	0.00296523	0.00105401	0.000538327	0.000168153	0.000144309	0.00102952	0.00105749	0.000651029	0.000713636	0.344764	0.0931159	0.000901443	0.292353	0.0382001	0.0256905	0.641397	0.010026	0.00387342	0.211747	0.00174749	0.146261	0.118748	0.218432	0.106747	0.147547	0.0500678	0.221232	0.235388	0.000880592	0.00106179	0.000971191	0.000128126
765	C12H25O	185.19	0.0048513	0.0111304	0.00142292	0.000904903	0.000990352	0.000273813	0.00326228	0.00418248	0.00149808	0.00283671	0.356581	0.139354	0.00270555	0.436053	0.113161	0.0373236	0.904557	0.0117041	0.00823241	0.179266	0.0025779	0.166214	0.195513	0.308164	0.0909218	0.190203	0.0901394	0.277645	0.315465	0.000640006	0.000850238	0.000745122	0.000148656
766	C13H28H	185.226	4.80356e-05	7.60784e-05	3.25652e-05	2.37566e-05	3.92314e-05	9.53493e-06	3.82004e-05	2.27799e-05	2.87155e-05	1.70092e-05	0.00141014	0.000359251	0.000146929	0.010019	0.00330815	0.00137651	0.00730787	0	0.000299369	0.000318046	0.000495796	0.000638773	0.00490122	0.00253574	0.000406921	0.00212066	0.0020846	0.00198287	0.00283761	2.51072e-05	2.83862e-05	2.67467e-05	2.3186e-06
767	C12H10O2	186.068	9.82496e-06	1.05314e-05	3.39233e-05	3.03118e-05	8.38619e-06	1.28823e-05	1.76433e-05	1.13631e-05	2.34165e-05	1.18187e-05	0.00957399	9.24871e-05	4.47618e-05	0	0	3.53001e-05	0.00308902	0	0.000303377	0	0.000108763	0.00323708	1.17667e-05	0.0011308	5.43817e-05	0.00110851	0.00151056	0.00273917	0.00422315	1.59821e-05	2.69748e-05	2.14785e-05	7.77303e-06
768	C6H12N5O2	186.099	0.000112455	0.000341173	0.000149403	9.17084e-05	2.25343e-05	4.15327e-05	0.000126468	0.00011493	9.61369e-05	7.4012e-05	0.012475	0.00158933	4.68234e-05	0.0072203	0	0	0.0176326	4.98688e-07	5.24753e-05	0.000719895	0	0.00470371	0.00240677	0.00589521	0.000359948	0.00334141	0.00245903	0.00618329	0.0075194	8.05051e-05	4.92931e-05	6.48991e-05	2.20702e-05
769	C14H18	186.14	0.000212376	0.000430535	0.000258084	0.000227919	3.18318e-05	4.80586e-05	0.000201467	0.000147517	0.000184248	0.000106566	0.0257312	0.00469351	0	0.0318234	0.00536005	0.00203749	0.0562902	0.000156333	0.000385916	0.0126307	0	0.0101416	0.0130736	0.0189441	0.00631533	0.0121187	0.00532562	0.017489	0.0204119	0.000172741	0.000116518	0.00014463	3.97553e-05
770	C11H24NO	186.185	0.000343864	0.000231268	0.000104184	0.000253243	1.52419e-05	7.39297e-06	0.000159199	0.000137793	0.000151748	0.000111157	0.0041124	0.00068146	0	0.00617957	0.00460441	0.000690485	0.0119189	0	0.000101012	0.00412713	9.62277e-06	0.00159795	0.00382482	0.00400663	0.00206838	0.00287445	0.00121987	0.00349501	0.00413629	3.16059e-05	2.37526e-05	2.76793e-05	5.55311e-06
771	C2Cl3F3H	186.909	4.06587e-05	4.78223e-05	0	0	0	0	1.47468e-05	2.29577e-05	3.37176e-06	1.64478e-05	0	0	0	0	0	0	0	0	0	0	0	0	0	0	0	0	0	0	0	0	1.50441e-05	7.52206e-06	1.06378e-05
772	C11H6O3H	187.039	1.02605e-05	0	2.55189e-05	1.13172e-05	2.03805e-05	2.87988e-05	1.6046e-05	1.08117e-05	1.75899e-05	8.20142e-06	0.0161586	0	5.66274e-05	0	0	0	0.00291349	0	0.000221961	0	0.00012941	0.00540508	0	0.00104515	6.47049e-05	0.00162873	0.00256257	0.00421441	0.00711164	8.71587e-06	2.83815e-05	1.85487e-05	1.39057e-05
773	C12H10O2H	187.075	7.01782e-05	0.000112378	0.000170625	6.96187e-05	4.88544e-05	6.73629e-05	8.98361e-05	4.47541e-05	8.72952e-05	4.23356e-05	0.102189	0.0193283	0.000309334	0.0101484	0	0	0.0242398	0.00245671	0.000913593	0	0	0.040609	0.00338278	0.00920337	0	0.0132988	0.0185993	0.0314389	0.0437514	0.000354782	0.000447081	0.000400932	6.5265e-05
774	C13H14OH	187.112	0.000504255	0.000939477	0.000438565	0.000456755	0.000274027	0.00029363	0.000484452	0.000241249	0.000422994	0.00015008	0.180483	0.0419981	0.00043691	0.0613657	0.0118591	0.00858977	0.159822	0.00553059	0	0.00669374	0	0.0743059	0.0272716	0.0551176	0.00334687	0.0400105	0.0311496	0.0773152	0.0858679	7.65677e-05	0.000137439	0.000107003	4.30425e-05
775	C14H18H	187.148	0.00880253	0.0193688	0.00443044	0.00494738	0.000373263	0.000280636	0.00636718	0.00712339	0.00418555	0.00454229	1.29429	0.444838	0.00320043	1.50851	0.31525	0.104816	3.39367	0.0263579	0.0130179	0.863547	0.00335158	0.580776	0.642858	1.14435	0.433449	0.700358	0.308747	1.02014	1.18571	0.00279057	0.00425668	0.00352363	0.00103669
776	C11H22O2H	187.169	0.000194272	0.000539034	0.000307449	0.000360903	7.61994e-05	7.13795e-05	0.000258206	0.000181083	0.000264992	0.000138303	0.0688908	0.0288282	0.000340756	0.115335	0	0	0.137945	0.00117186	0.000283538	0.0343832	5.06876e-05	0.0326866	0.0384449	0.0464667	0.0172169	0.0337038	0.0123588	0.0482627	0.0506104	0	7.81631e-06	3.90816e-06	5.52697e-06
777	C7H9NO5H	188.055	6.50958e-07	0	1.06429e-05	3.04465e-06	4.05341e-06	7.63536e-06	4.33788e-06	4.11802e-06	5.15221e-06	3.3542e-06	0.00776527	0.0150469	0.000777241	0.000813693	0	0	0.00639381	0.000826175	0.000636801	0	0	0.00786314	0.000271231	0.00261893	0	0.00268832	0.00364477	0.00564127	0.00608521	2.21459e-05	8.14816e-06	1.5147e-05	9.89791e-06
778	C8H13NO4H	188.092	5.06127e-06	3.75403e-06	2.30113e-05	5.26624e-06	8.25471e-06	5.39991e-06	8.4579e-06	7.28071e-06	9.06371e-06	6.89755e-06	0.0071056	0.0119655	0.000477121	0.000106942	0	0	0.00404495	0.000936963	0.000324183	0	0.000107158	0.00651608	3.56472e-05	0.0017687	5.35788e-05	0.0020935	0.00305836	0.00454393	0.00497718	3.24327e-05	2.7351e-05	2.98919e-05	3.59329e-06
779	C9H17NO3H	188.128	0.000850844	0.00135418	0.000532317	0.000239123	2.50593e-05	2.86741e-05	0.000505032	0.000523331	0.000298065	0.000369972	0.0214223	0.00647174	1.20721e-05	0.0429698	0.00913797	0.00301457	0.0436589	0.00108875	0.000570406	0.0125799	0.000425952	0.00930202	0.0183741	0.015106	0.00650294	0.0123213	0.00539631	0.0153733	0.0158002	0.000515326	0.000511196	0.000513261	2.92061e-06
780	C10H21NO2H	188.165	0.000321574	0.000553058	0.000258922	0.000130838	2.16443e-05	8.19577e-06	0.000215705	0.000207271	0.000144205	0.000146105	0.0230262	0.00913523	9.88224e-06	0.045268	0.00915558	0.00233629	0.0633945	0.000515057	0.000413535	0.024265	0.000126464	0.0107238	0.01892	0.021441	0.0121957	0.0158201	0.00517407	0.0200294	0.0219583	3.53257e-05	4.0712e-05	3.80189e-05	3.80865e-06
781	C11H8O3H	189.055	0	7.44868e-06	1.63968e-05	5.02657e-05	0	2.91006e-05	1.7202e-05	1.96081e-05	2.9326e-05	2.33557e-05	0.0510299	0.00403133	0.000254386	0	0	0	0	0.000421899	0.000184015	0	0	0.0184385	0	0.000201972	0	0.00466012	0.00918609	0.0125716	0.02256	2.5387e-05	0.000102181	6.37839e-05	5.43014e-05
782	C9H16O4H	189.112	8.12854e-05	0.000223646	8.69276e-05	0.000121977	2.77508e-05	4.04282e-05	9.70024e-05	7.07208e-05	9.14795e-05	4.74242e-05	0	0.00110931	0.000362226	0.00195999	0.000325839	0.00152853	0.0159596	0.0018475	0.000133486	0.00733655	0	0.000490512	0.00127145	0.0059802	0.00366827	0.00285261	0.00248507	0.0035058	0.00569096	0.000206097	0.000210775	0.000208436	3.30779e-06
783	C13H16OH	189.127	0.00152144	0.00353462	0.000411744	0.000314288	6.28741e-05	3.05037e-05	0.000979244	0.00136587	0.000431343	0.000906039	0.303782	0.0783849	0.00043524	0.18023	0.0420634	0.0134566	0.374181	0.0033457	0.00106118	0.0361257	0	0.127534	0.0785835	0.126196	0.0180629	0.087594	0.0516432	0.151562	0.162885	0	0.000228618	0.000114309	0.000161657
784	C10H20O3H	189.149	0.00150229	0.00238891	0.000906954	0.00116622	0.000157802	0.000171655	0.00104897	0.000848376	0.000872341	0.000581611	0.0614174	0.0396935	0.00161771	0.328876	0.058626	0.0264404	0.0598866	0.0111628	0.00255454	0.0144345	0.00464573	0.0342429	0.137981	0.0245347	0.00954011	0.0515746	0.0584935	0.0441115	0.0544131	0.000381299	0.000446754	0.000414026	4.62835e-05
785	C14H20H	189.164	0.0215257	0.0354745	0.0093941	0.0110515	0.000773451	0.000345068	0.0130941	0.0134475	0.0089061	0.0088105	2.94715	1.03579	0.0115328	3.91114	0.969183	0.24949	7.90421	0.0440628	0.0419192	2.35661	0.0169521	1.33149	1.70994	2.6634	1.18678	1.7229	0.664662	2.39865	2.7417	0.00124149	0.00306059	0.00215104	0.0012863
786	C11H24O2H	189.185	0.000927022	0.00190757	0.000610409	0.000707607	0.000111211	6.95785e-05	0.000722233	0.000672159	0.000558904	0.000436413	0.120648	0.0507932	0.00106166	0.355567	0.0586626	0.0193653	0.268215	0.00339884	0.00193833	0.0318642	0.000775581	0.0575011	0.144532	0.0911842	0.0163199	0.0773842	0.0542322	0.0929946	0.101936	0.000106416	0.000173675	0.000140045	4.75589e-05
787	C10H7NO3H	190.05	9.82381e-06	1.57975e-05	1.36826e-05	5.65931e-06	4.15828e-06	3.06773e-06	8.69821e-06	5.2547e-06	7.14061e-06	4.3656e-06	0.0183568	0.000434319	0	0.000565552	0	0	0.0080868	0	0.000226393	0	0.000301299	0.00626371	0.000188517	0.00277106	0.000150649	0.00234348	0.00288695	0.0056343	0.00820017	0	4.49184e-05	2.24592e-05	3.17621e-05
788	C7H11NO5H	190.071	6.73869e-06	1.3347e-05	2.78219e-05	2.70379e-05	3.66303e-06	1.10485e-05	1.49428e-05	1.02412e-05	1.98808e-05	1.08623e-05	0.00456657	0.00210277	9.26449e-05	0.001908	0	0.000321324	0.00756585	9.62182e-05	0.000223653	0	0.000348864	0.00225399	0.000743107	0.00262857	0.000174432	0.00145003	0.00117788	0.00272093	0.00298418	0	1.79297e-05	8.96484e-06	1.26782e-05
789	C11H11NO2H	190.086	1.23236e-05	2.20002e-05	8.32113e-05	5.12414e-05	4.74876e-06	1.43334e-05	3.13098e-05	3.0106e-05	4.19788e-05	2.9182e-05	0.0270971	0.00236585	8.40168e-05	0.00304189	0	0.000107316	0.015966	0.00200057	8.66585e-05	0	0	0.00984899	0.00104973	0.00601773	0	0.00422911	0.00457442	0.00951487	0.0121966	8.81016e-05	3.53821e-05	6.17418e-05	3.72783e-05
790	C8H15NO4H	190.107	2.2164e-05	3.36868e-05	9.38744e-05	4.14511e-05	2.24034e-06	1.54563e-05	3.48121e-05	3.20289e-05	4.04617e-05	3.01937e-05	0.00982626	0.000202895	0	0.000497194	0	0	0.00391212	0	0	0	0	0.00334305	0.000165731	0.00130404	0	0.00120321	0.00153982	0.0029335	0.00437147	4.38297e-05	3.5386e-05	3.96079e-05	5.97054e-06
791	C12H15NOH	190.123	5.75412e-05	6.38794e-05	5.22379e-05	3.27866e-05	4.63447e-07	1.0885e-05	3.62989e-05	2.61088e-05	3.02659e-05	1.99932e-05	0.00224407	0.000300582	2.50889e-05	0.00163648	0.00017336	0.000235198	0.00497023	0	4.69446e-05	0.00135544	0	0.000856579	0.00068168	0.00167239	0.000677722	0.000972093	0.000474256	0.00149537	0.00181408	4.8663e-05	2.82506e-05	3.84568e-05	1.44338e-05
792	C9H19NO3H	190.144	6.65809e-05	0.000106623	6.03535e-05	5.49866e-05	7.95681e-06	8.61581e-06	5.08528e-05	3.76539e-05	4.42528e-05	2.70518e-05	0.00659941	0.000973098	0	0.0184376	0.00283203	0.000941469	0.0193471	0	0.00014513	0.00442337	0	0.00252417	0.00740371	0.00649741	0.00221168	0.00465924	0.00267457	0.00561406	0.00702586	4.74864e-05	3.65703e-05	4.20283e-05	7.71886e-06
793	C13H19NH	190.159	9.32828e-05	0.000216731	0.000147662	0.000223142	6.48085e-05	8.01428e-05	0.000137628	6.96338e-05	0.000157985	6.92637e-05	0.00836313	0.00448132	0.000224906	0.018284	0.00758436	0.00242011	0.0193709	0.000931685	0.000425021	0.00910613	0.000174917	0.00435645	0.00942949	0.0069092	0.00464052	0.00633392	0.00235877	0.00721084	0.00659864	6.43554e-05	5.39103e-05	5.91328e-05	7.38581e-06
794	C10H6O4H	191.034	5.57383e-05	0.000360845	0.000122857	0.000385756	0.00038687	0.000342864	0.000275822	0.000146953	0.000318066	0.000118252	0.0359388	0.000923688	0.000566313	0	0	0.000726761	0	0.00573057	0.000768307	0	0	0.0124763	0.000242254	0.00216629	0	0.0037212	0.00591663	0.00923231	0.0157357	0.000163462	0.000125595	0.000144528	2.67755e-05
795	C11H10O3H	191.07	0.00011319	7.22736e-05	0.000119539	0.000128056	8.80274e-05	0.000101341	0.000103738	2.0847e-05	0.000113161	1.96286e-05	0.154819	0.075616	0.00101632	0.027839	0	0	0.0937757	0.00787734	0.00199732	0	0	0.0771506	0.00927967	0.0345501	0	0.0302451	0.0345107	0.0656109	0.069953	0.000107108	0.000296231	0.000201669	0.000133731
796	C12H14O2H	191.107	0.00015898	0.000301397	0.000165034	0.000172797	0	6.30592e-05	0.000143545	0.000103495	0.000133035	7.59252e-05	0.208939	0.0303239	0	0.0358163	0	0.00724572	0.14654	0.00729	3.50032e-05	0.00492173	0	0.0797543	0.014354	0.0512882	0.00246087	0.0369643	0.0352981	0.0788355	0.0959123	0.000344946	0.000591161	0.000468054	0.0001741
797	C13H18OH	191.143	0.00119245	0.00188161	0.000715232	0.000853617	0.000258415	0.000225367	0.000854447	0.000622845	0.000694586	0.000413081	0.26868	0.084201	0.00204995	0.270938	0.0860503	0.0289773	0.345038	0.00833966	0.00172089	0.0335465	0.000168882	0.11831	0.128655	0.118366	0.0168577	0.0955474	0.0526847	0.144134	0.143183	0	0.000156609	7.83047e-05	0.00011074
798	C14H22H	191.179	0.0121273	0.0149643	0.00699334	0.0104356	0.00133196	0.000597028	0.00774158	0.00585401	0.00710609	0.00451107	3.06495	1.19696	0.102416	3.90417	1.71271	0.605314	7.69449	0.0848779	0.142351	1.97605	0.21985	1.45478	2.07406	2.64057	1.09795	1.81684	0.68132	2.44658	2.62321	0.001256	0.00187691	0.00156645	0.000439049
799	C9H5O4NH	192.029	3.58121e-05	8.17043e-05	1.96173e-05	9.17046e-06	5.92927e-06	2.35904e-06	2.57654e-05	2.99487e-05	1.36759e-05	2.03356e-05	0.00444999	0.000255544	2.69069e-05	0.000705727	9.29872e-05	0	0.00561789	0	0.00012114	0.000116459	0.000223266	0.00157748	0.000266238	0.00191301	0.000169862	0.000981648	0.00089317	0.00200773	0.00256554	3.85014e-06	9.75077e-06	6.80045e-06	4.17237e-06
800	C6H9NO6H	192.05	2.95891e-05	8.58873e-05	1.24694e-05	1.12053e-05	2.28853e-07	4.018e-06	2.38996e-05	3.20069e-05	1.25526e-05	2.03706e-05	0.00693369	0.000898081	5.05216e-05	0.00136233	0.000130588	0.000153446	0.00357742	0	0.000218812	0.000301768	0.000324104	0.00262743	0.000548789	0.00126541	0.000312936	0.00118864	0.0010412	0.00241988	0.00299742	8.18564e-06	2.70618e-05	1.76237e-05	1.33475e-05
801	C10H9NO3H	192.066	8.82924e-05	0.000209312	1.29243e-05	8.39159e-06	8.14797e-07	3.65568e-06	5.38984e-05	8.29798e-05	1.87934e-05	5.61119e-05	0.0110496	0.000589553	0	0.00134037	0	0.000203966	0.00850881	0.000375265	0.000275573	0.000344974	0	0.00387973	0.000514778	0.00305322	0.000172487	0.00190505	0.00183959	0.00411175	0.00526055	1.42814e-05	4.56805e-05	2.99809e-05	2.22025e-05
802	C7H13NO5H	192.087	1.57076e-05	2.21982e-05	2.81366e-05	2.32109e-05	3.4219e-07	8.24264e-06	1.63064e-05	1.04171e-05	1.80352e-05	9.89879e-06	0.00829622	0.00110129	7.14918e-05	0.00307422	0	0	0.00811512	0	0	0	0	0.00315634	0.00102474	0.00270504	0	0.00172153	0.00146914	0.0034746	0.00420904	5.11106e-05	2.87889e-05	3.99497e-05	1.57838e-05
803	C11H13NO2H	192.102	2.40628e-05	1.16867e-05	8.83007e-05	2.75102e-05	3.1608e-05	8.20579e-05	4.42044e-05	3.24894e-05	4.73664e-05	2.82044e-05	0.00446611	0.000606379	3.4845e-05	0.00344897	0.000437049	0.000302685	0.00762996	0.000194287	0	0	0	0.00170244	0.00139624	0.00260808	0	0.00142669	0.00108137	0.0024703	0.00302346	0	0	0	0
804	C8H17NO4H	192.123	7.50163e-05	0	0.000133342	0.000153718	0.000125806	0.00021851	0.000117732	7.40885e-05	0.000146246	5.34284e-05	0.00322212	0.00333219	0.000358833	0	0	0	0.000571605	0	0	0	0	0.00230438	0	0.000190535	0	0.000623729	0.00112403	0.00144374	0.00172923	0	0	0	0
805	C12H17NOH	192.138	0.00149649	0.000620084	0.0029777	0.00370491	0.00235977	0.00650836	0.00294455	0.00205533	0.00358625	0.00160221	0.0167623	0.00386629	0.00136472	0.0130934	0	0	0.0513533	0	0	0	0	0.00733111	0.00436446	0.0171178	0	0.00720334	0.00726314	0.0130788	0.0187072	0	0	0	0
806	C13H21NH	192.175	0.000149772	0.000222864	0.000282345	0.000306897	7.16133e-05	0.00018178	0.000202545	8.7212e-05	0.00023803	9.30678e-05	0.0038147	0.00161463	0.000606329	0.0041097	0.0052253	0.00329392	0.0160758	0	0.000214366	0.00757874	0.00106135	0.00201189	0.00420964	0.00543006	0.00432004	0.00399291	0.00143106	0.00456983	0.00537159	2.97235e-05	9.90784e-06	1.98157e-05	1.40118e-05
807	C9H4O5H	193.013	0.00015686	0.000430791	0.000152739	0.000218261	0.000103239	9.85397e-05	0.000193405	0.000124168	0.0001772	7.61631e-05	0.00107796	3.61989e-05	7.82632e-05	0.000345972	0	0.000382535	0.00308587	0.000606525	3.22153e-05	0	0	0.000397473	0.000242835	0.00124154	0	0.000470461	0.000539454	0.000832533	0.00111832	6.97108e-06	2.32369e-06	4.64738e-06	3.2862e-06
808	C10H8O4H	193.05	7.80985e-05	0.000340366	8.81973e-05	4.6552e-05	0.000490436	0.00018155	0.0002042	0.000176179	0.000158111	0.000164869	0.0333	0.0015843	0.000526296	0.00346343	0	0.00421302	0.00286379	0.00691831	0.00118607	0	0	0.0118035	0.00255882	0.00365606	0	0.0045046	0.00510137	0.00947559	0.0141098	0.000163079	0.000277011	0.000220045	8.05616e-05
809	C11H12O3H	193.086	4.63252e-05	4.16763e-05	0.000238413	0.000165803	4.29085e-05	7.24413e-05	0.000101261	8.21951e-05	0.00013709	7.91702e-05	0.043093	0.00478239	0.000268977	0.00191531	0	0.00131364	0.0263838	0.00149315	6.73053e-05	0	0.000140313	0.0160481	0.00107632	0.00931474	7.01565e-05	0.00662734	0.00752294	0.0152099	0.0196206	6.97641e-05	0.00010985	8.98073e-05	2.83453e-05
810	C12H16O2H	193.122	0.000199107	0.000228504	0.000233171	0.00021064	3.04481e-05	0.000125597	0.000171245	7.91823e-05	0.000174423	7.0339e-05	0.103927	0.0112948	0	0.0155337	0	0	0.0732046	0.00159176	0	0.00731338	0	0.0384074	0.0051779	0.0249321	0.00365669	0.0180435	0.0166798	0.0385767	0.0479862	0.000366496	0.00034317	0.000354833	1.64942e-05
811	C13H20OH	193.159	0.000198243	0.000223872	7.5434e-05	8.33485e-05	6.5592e-05	0.000126148	0.000128773	6.74937e-05	9.54763e-05	5.08909e-05	0.261007	0.0637204	0.00335211	0.218306	0.0575215	0.0319883	0.37278	0.0103216	0.00111235	0.0489277	0.000615113	0.10936	0.102605	0.128071	0.0247714	0.091202	0.0455782	0.142391	0.148982	0.000218802	0.000259276	0.000239039	2.8619e-05
812	C14H24H	193.195	0.00478725	0.00271136	0.00194944	0.00222953	0.0019645	0.00157564	0.00253629	0.00116497	0.00213247	0.000672493	1.84622	0.796547	0.159233	1.86652	1.08201	0.645415	4.48366	0.139487	0.153018	1.24542	0.394535	0.934	1.19798	1.59205	0.819979	1.136	0.342783	1.49629	1.47975	0.00120202	0.00285176	0.00202689	0.00116654
813	C9H7NO4H	194.045	1.33535e-05	2.80529e-05	2.56991e-05	1.49529e-05	8.09668e-06	2.41819e-06	1.54289e-05	9.92386e-06	1.4551e-05	7.87417e-06	0.0131662	0.00204377	0.000254855	0.00178516	0.000573756	0.000604029	0.002547	0.000461088	0.000497956	0	1.95816e-05	0.00515494	0.000987648	0.00116868	9.79081e-06	0.00183027	0.00227415	0.00396697	0.00554653	1.09766e-07	1.68784e-05	8.4941e-06	1.18572e-05
814	C10H11NO3H	194.081	4.80565e-05	0.000108554	0.000162085	0.000127057	9.60778e-06	7.05073e-05	8.76446e-05	5.56463e-05	0.000103662	5.26451e-05	0.0382937	0.0098284	6.35964e-06	0.01562	0.00263886	0.000574155	0.0294009	0.000873605	0.000100245	0.00105688	0	0.0160428	0.00627768	0.0101249	0.000528439	0.00824346	0.00652574	0.0158605	0.0174635	0	5.47884e-05	2.73942e-05	3.87412e-05
815	C11H15NO2H	194.118	0.00015623	0.00015954	0.000173835	6.68659e-05	1.62912e-05	5.1295e-05	0.000104009	6.71404e-05	8.39288e-05	5.79336e-05	0.00902266	0.00636146	2.53995e-05	0.00488662	0.000825769	0.00158379	0.0123678	0.000821378	2.3345e-05	0	0.000204226	0.00513651	0.00243206	0.00440418	0.000102113	0.00301872	0.00225502	0.00542357	0.00520194	0	3.1323e-05	1.56615e-05	2.21487e-05
816	C12H19NOH	194.154	7.57378e-06	1.94745e-05	9.65285e-06	1.32195e-05	3.99057e-06	7.831e-06	1.02904e-05	5.41204e-06	1.0392e-05	3.84804e-06	0.00247081	0.000665915	0.000105181	0.00210837	0.000322076	0.000437608	0.00520356	1.14396e-05	8.50898e-05	0.00105663	2.84752e-06	0.00108064	0.000956017	0.0017667	0.000529737	0.00108327	0.000513053	0.00165659	0.00187765	0	3.34333e-06	1.67167e-06	2.36409e-06
817	C13H23NH	194.19	0.000105559	8.16073e-05	7.65501e-05	0.000132023	1.56985e-05	6.11397e-06	6.9592e-05	4.96346e-05	8.09399e-05	5.27479e-05	0.00688865	0.00338761	0.00080175	0.00940403	0.00643833	0.00308401	0.0198452	0.00104724	0.00175443	0.00898162	0.00233605	0.00369267	0.00630879	0.00754895	0.00565884	0.00580231	0.00161022	0.00675152	0.00628894	0	1.02533e-05	5.12667e-06	7.2502e-06
818	C10H10O4H	195.065	0.00185105	0.00701131	0.0040262	0.00568009	0.00188969	0.00335207	0.0039684	0.00206768	0.00436393	0.00158849	0.0221121	0.0066672	0.00273794	0.00170915	0	0.00195638	0.00400646	0.00487043	0.00119993	0	0	0.0105058	0.00122184	0.00335894	0	0.00377164	0.00469913	0.00781133	0.00906167	0.000139689	0.000203422	0.000171556	4.50661e-05
819	C11H14O3H	195.102	0.000213931	0.000348839	0.000757667	0.00041152	0.000154263	0.000220698	0.000351153	0.000220689	0.000399658	0.00020566	0.0548001	0.0106331	0.000333592	0.0123712	0	0.00307608	0.0458023	0.00219175	0.000738171	0.00150639	0.00111534	0.0219223	0.0051491	0.0162441	0.00131086	0.0111566	0.00957097	0.022583	0.025858	0.000254294	0.000168763	0.000211529	6.04794e-05
820	C15H14H	195.117	0.00670834	0.0150507	0.00159527	0.000694577	5.35937e-05	0.000176741	0.00404654	0.0059387	0.00151401	0.00404494	0.0778301	0.0452787	0.000394851	0.0609667	0	0.0184662	0.198828	0.0069638	0.000246149	0	0	0.0411679	0.0264776	0.0686793	0	0.0340812	0.028674	0.059862	0.0718248	0.000919614	0.00165047	0.00128504	0.000516793
821	C12H18O2H	195.138	0.000130063	0.000257912	0.000167628	7.05283e-05	3.2959e-06	2.54938e-05	0.000109154	9.55849e-05	8.19475e-05	7.14753e-05	0.202449	0.0334849	0.000203247	0.0832644	0.00888594	0.0133062	0.208336	0.00411302	0.000841644	0.0188931	0	0.0787122	0.0351522	0.0710969	0.00944656	0.048602	0.0322836	0.0897555	0.101679	0.000705956	0.000628379	0.000667168	5.48553e-05
822	C13H22OH	195.174	0.000262655	0.000292924	0.00012997	0.000190276	0.000175521	0.000291722	0.000223845	6.80588e-05	0.000198942	5.91154e-05	0.333957	0.0834839	0.00197753	0.277477	0.0605981	0.0267521	0.548669	0.0125246	0.00343071	0.0916407	0.00319053	0.139806	0.121609	0.188208	0.0474156	0.12426	0.0584327	0.195226	0.209708	0.000336985	0.000387934	0.00036246	3.60262e-05
823	C14H26H	195.211	0.00229194	0.00249812	0.00353741	0.00430688	0.00308357	0.00336935	0.00318121	0.00073435	0.00368422	0.000783853	0.657201	0.285114	0.039563	0.619032	0.323316	0.161141	1.58789	0.125376	0.07222	0.298352	0.0741251	0.327292	0.367829	0.595162	0.186239	0.36913	0.169599	0.522943	0.530778	0.00489027	0.00423109	0.00456068	0.00046611
824	C8H5NO5H	196.024	4.56379e-05	0.000107394	5.45816e-05	6.95792e-05	2.04604e-05	8.29452e-06	5.09912e-05	3.55625e-05	5.06407e-05	2.6814e-05	0.00169333	0.000312317	3.26422e-05	0.000487267	0	0	0.000844351	0.00024817	6.0698e-05	8.96476e-05	0.000146668	0.000679429	0.000162422	0.000384406	0.000118158	0.000336104	0.000256821	0.000643097	0.000698784	5.38838e-06	6.90478e-06	6.14658e-06	1.07225e-06
825	C9H9NO4H	196.06	2.45396e-05	1.98967e-05	5.16779e-05	5.32784e-05	1.71813e-05	3.12353e-05	3.29682e-05	1.58537e-05	4.16257e-05	1.70577e-05	0.024884	0.00492329	4.47796e-06	0.00128504	0	0	0.00321969	0.000673805	0.000273881	0	0	0.00993725	0.000428345	0.00138913	0	0.00293868	0.00470173	0.00724546	0.0107267	1.70794e-05	2.69815e-05	2.20305e-05	7.00183e-06
826	C10H13NO3H	196.097	6.83745e-05	0.000329962	0.0001888	0.000163856	3.49067e-05	7.25403e-05	0.000143073	0.000109275	0.0001392	6.99881e-05	0.0272912	0.00886863	0.000389545	0.02175	0.00550811	0.00138486	0.0303947	0.000868812	0.000234979	0.00651643	0	0.0121831	0.00954765	0.0104995	0.00325822	0.00887212	0.003898	0.0139384	0.0133806	5.53843e-05	7.07105e-05	6.30474e-05	1.08372e-05
827	C11H17NO2H	196.133	0.000297319	0.000425078	0.000300804	0.000295528	8.70319e-05	0.000124719	0.00025508	0.00012621	0.000243816	9.71458e-05	0.00876625	0.00293409	0.000154848	0.0112953	0.00157708	0.00103783	0.0181708	0.000671569	0.000287951	0.00268594	0.000519771	0.00395173	0.00463673	0.00637679	0.00160285	0.00414203	0.00197674	0.00606834	0.00649358	7.69215e-05	6.88676e-05	7.28945e-05	5.69492e-06
828	C12H21NOH	196.17	2.93537e-05	2.5129e-05	3.31404e-05	3.90225e-05	2.55002e-05	1.83408e-05	2.84144e-05	7.16259e-06	3.16993e-05	8.34234e-06	0.00313422	0.000913559	1.84e-05	0.00292011	0.00131436	0.000687758	0.00665143	0.000327513	6.17531e-05	0.00139417	0	0.00135539	0.00164074	0.0023469	0.000697087	0.00151003	0.000683672	0.00217906	0.00234111	1.07848e-05	5.52903e-06	8.15692e-06	3.71639e-06
829	C13H25NH	196.206	0.000309021	0.000152376	0.000114881	0.000347409	2.96404e-05	5.35719e-05	0.000167816	0.000132195	0.000198575	0.000140777	0.00692758	0.00329026	0.000461951	0.0080737	0.00411422	0.00230247	0.0177376	0.00141669	0.000732174	0.00422961	0.000577297	0.00355993	0.00483013	0.00662881	0.00240345	0.00435558	0.00181077	0.00585288	0.00583735	1.57112e-05	2.0048e-05	1.78796e-05	3.06655e-06
830	C10H12O4H	197.081	0.000182893	0.000356933	0.000415039	0.000335225	8.00046e-05	0.000258257	0.000271392	0.000123822	0.000295553	0.000109192	0.0465596	0.00820772	0.000384288	0.00871634	0	0.00582852	0.055647	0.0016519	0.00226209	0	0.0012371	0.0183839	0.00484829	0.0198537	0.000618548	0.0109261	0.0096351	0.0216494	0.0254586	0.000107606	0.000352494	0.00023005	0.000173161
831	C11H16O3H	197.117	0.00117676	0.00228601	0.0019663	0.00162218	0.000377997	0.000648626	0.00134631	0.000747886	0.00136178	0.000605335	0.141986	0.0482161	0.000858266	0.104801	0.00354896	0.0127231	0.215172	0.00769588	0.00699306	0	0	0.0636869	0.0403578	0.0766202	0	0.0451662	0.0336426	0.0794746	0.0866742	0.00078869	0.00101571	0.000902199	0.000160526
832	C15H16H	197.132	0.033872	0.0508126	0.0110908	0.00747482	0.000469953	0.000947638	0.0174446	0.0204124	0.00881688	0.0139542	0.492871	0.248089	0.00138507	0.715784	0.109726	0.0749166	1.41533	0.0177988	0.00267456	0.199181	0.000476574	0.247448	0.300142	0.478601	0.0998285	0.281505	0.156376	0.41794	0.492545	0.00199777	0.00461367	0.00330572	0.00184972
833	C12H20O2H	197.154	0.000510137	0.00106089	0.000942623	0.000405259	2.72649e-05	6.13037e-05	0.000501247	0.000432554	0.000429004	0.000346172	0.255568	0.0487239	3.48064e-05	0.180803	0.0161861	0.019276	0.391602	0.000983205	0.00214409	0.0738431	0	0.101442	0.0720882	0.131577	0.0369215	0.0855071	0.0404843	0.139663	0.155839	0.000544107	0.000759965	0.000652036	0.000152635
834	C13H24OH	197.19	0.000634867	0.000837856	0.000607112	0.000874469	0.000450963	0.000700828	0.000684349	0.000156758	0.000722309	0.000161532	0.337608	0.0930484	0.00262053	0.351304	0.0824097	0.032407	0.664843	0.0119852	0.00345844	0.105062	0.00194575	0.144426	0.155374	0.226762	0.053504	0.145016	0.0710974	0.219351	0.242904	0.000333495	0.000259411	0.000296453	5.23852e-05
835	C14H28H	197.226	0.013816	0.0199338	0.0237707	0.0410051	0.0192469	0.0317124	0.0249141	0.00986441	0.0311521	0.0112785	0.847572	0.406497	0.0738452	0.863815	0.53998	0.225646	2.55185	0.222472	0.159667	0.616877	0.156516	0.442638	0.543147	0.977996	0.386697	0.58762	0.26818	0.796639	0.829504	0.0177198	0.0130989	0.0154093	0.00326742
836	C8H7NO5H	198.04	4.49748e-07	0	3.95809e-06	1.44294e-05	3.78458e-06	3.46171e-06	4.34726e-06	5.23434e-06	8.02154e-06	6.68629e-06	0.00790386	0	7.2159e-06	0.000162078	0	0.000291817	0.000767963	0	0.000151322	0.000129116	0.000513332	0.00263702	0.000151298	0.000306428	0.000321224	0.000853994	0.00119117	0.00200595	0.0034422	1.99353e-05	2.89084e-05	2.44218e-05	6.34491e-06
837	C9H11NO4H	198.076	1.25129e-05	1.32616e-05	4.15144e-05	2.16733e-05	1.00102e-05	1.98583e-05	1.98051e-05	1.15475e-05	2.27273e-05	1.04807e-05	0.00535185	0.00022611	0.000207599	0.00105876	0.000319708	0.000599497	0.00544946	0	0.000206914	0	0	0.00192852	0.000659322	0.00188546	0	0.00111833	0.00094978	0.00219919	0.00276798	0	6.57383e-06	3.28692e-06	4.6484e-06
838	C10H15NO3H	198.112	7.82958e-05	0.000161637	0.000122265	4.55782e-05	2.37357e-05	2.21494e-05	7.56101e-05	5.6631e-05	5.94351e-05	4.46052e-05	0.0113262	0.00106134	0	0.0105819	0.000538184	0.00135	0.0242796	0	0.000413542	0.000986267	0	0.00412919	0.00415671	0.00823106	0.000493133	0.00425252	0.00316155	0.00701906	0.00916508	1.87587e-05	4.52337e-05	3.19962e-05	1.87206e-05
839	C11H19NO2H	198.149	9.91123e-05	0.000183973	9.3108e-05	8.52639e-05	8.69209e-05	2.5035e-05	9.55689e-05	5.09705e-05	8.25701e-05	3.43301e-05	0.00619762	0.000492268	2.37795e-05	0.00653502	0.00100756	0.00094803	0.0163434	0	6.39772e-05	0.00148996	0	0.00223789	0.0028302	0.00546913	0.00074498	0.00282055	0.00197168	0.0043992	0.00594651	4.26349e-05	4.46301e-05	4.36325e-05	1.41083e-06
840	C12H23NOH	198.185	4.59899e-05	5.48607e-05	5.60294e-05	8.73888e-05	3.94145e-05	3.19193e-05	5.26004e-05	1.93513e-05	6.27113e-05	2.472e-05	0.00303304	0.000304484	4.2796e-05	0.00469417	0.00167772	0.000540989	0.010013	0	0.000104966	0.00221661	0.000120141	0.00112677	0.00230429	0.00337267	0.00116837	0.00199303	0.00106938	0.00266009	0.00350054	2.31873e-05	1.06732e-05	1.69303e-05	8.84878e-06
841	C13H27NH	198.222	7.19753e-05	0.000104256	9.54797e-05	0.000162435	7.89437e-05	0.00013536	0.000108075	3.47119e-05	0.000127232	3.96494e-05	0.00136464	0.00072329	0.000509629	0.00328513	0.00246981	0.0011272	0.00969805	9.76035e-05	0.00114386	0.00458281	0.00168278	0.000865853	0.00229405	0.0036465	0.00313279	0.0024848	0.00121475	0.00264306	0.00322864	0.00012262	7.42887e-05	9.84544e-05	3.41754e-05
842	C9H10O5H	199.06	0.00017815	0.000300522	1.09393e-05	8.15443e-07	1.38659e-05	6.5039e-06	8.51328e-05	0.000125635	2.44511e-05	9.03328e-05	0.000752146	0	0.000685189	0.000447941	0.000823981	0.00126393	0.000494501	0.000551602	0.000417548	0.000386921	0	0.000479112	0.000845285	0.000487884	0.00019346	0.000501435	0.000266935	0.0004558	0.000296198	9.77913e-05	0.000122851	0.000110321	1.77197e-05
843	C10H14O4H	199.096	0.000150948	0.000232142	0.000216117	0.000206496	8.46773e-05	0.000201393	0.000181962	5.49367e-05	0.000188212	4.62748e-05	0.0413545	0.0078344	0.000360102	0.00368577	0	0.00173546	0.0282721	0.00212204	0	0	0	0.0165163	0.00180707	0.0101314	0	0.00711369	0.00766552	0.0157606	0.0189371	0	8.12672e-06	4.06336e-06	5.74646e-06
844	C11H18O3H	199.133	0.000562403	0.000863374	0.000537052	0.000397387	0.00018746	0.00295172	0.000916567	0.0010213	0.000812194	0.000931669	0.113175	0.0273842	0.000883606	0.0686857	0.00160251	0.0122013	0.142538	0.00723734	0	0	0	0.0471476	0.0274965	0.0499253	0	0.0311424	0.023037	0.0563091	0.0623077	0.000742499	0.000590017	0.000666258	0.000107821
845	C15H18H	199.148	0.00554398	0.0101186	0.00163274	0.000687966	0.000492325	0.000102391	0.00309634	0.00397468	0.00131778	0.0027759	0.237493	0.0973503	0.00032679	0.276808	0.0252891	0.0321584	0.828792	0.0075999	0.00121501	0.0596782	0	0.111723	0.111419	0.279202	0.0298391	0.133046	0.104779	0.215482	0.292063	0.000702012	0.00176826	0.00123514	0.000753952
846	C12H22O2H	199.169	0.000433987	0.00068494	0.000973959	0.00076154	0.000474285	0.000454056	0.000630461	0.000215524	0.000696951	0.000199264	0.252778	0.0658191	0.000928911	0.207943	0.023881	0.0206173	0.452997	0.00886791	0.00284923	0.154263	0.000335141	0.106509	0.084147	0.154905	0.0772991	0.105715	0.0350851	0.158881	0.167639	0.000668181	0.000926278	0.000797229	0.000182502
847	C13H26OH	199.206	0.00229479	0.0047748	0.000522394	0.000446065	0.000362525	0.000181627	0.00143037	0.00181248	0.000657136	0.00122966	0.355562	0.131438	0.00243748	0.394325	0.0963443	0.0353663	0.822133	0.0118937	0.00603882	0.140266	0.00101918	0.163146	0.175345	0.280022	0.0706428	0.172289	0.0856957	0.258777	0.291077	0.000403349	0.000648171	0.00052576	0.000173115
848	C14H30H	199.243	8.47392e-05	0.000131377	1.85305e-05	3.86064e-05	1.46581e-05	1.3805e-05	5.0286e-05	4.79745e-05	3.27987e-05	3.13661e-05	0.00196369	0.000530459	8.25419e-05	0.0119453	0.00284446	0.0014786	0.00937333	0	0.000310225	0.000689063	0.000251114	0.000858898	0.00542277	0.00322785	0.000470088	0.0024949	0.00230116	0.0025124	0.00355748	2.75371e-05	2.65e-05	2.70185e-05	7.33368e-07
849	C7H5NO6H	200.019	4.89514e-06	1.50663e-05	8.06735e-06	8.28951e-06	4.95646e-06	5.53745e-06	7.80203e-06	3.8666e-06	7.51005e-06	2.18767e-06	0.00129635	3.45959e-06	0.000206878	0	0	0	0.00149139	0	0.000147762	0	0	0.00050223	0	0.000546384	0	0.000262153	0.000303245	0.000556908	0.000720002	0	1.36085e-07	6.80424e-08	9.62265e-08
850	C8H9NO5H	200.055	9.18876e-06	2.00906e-05	2.0372e-05	1.93301e-05	5.08738e-06	1.29411e-05	1.45017e-05	6.45449e-06	1.60715e-05	5.72821e-06	0.00672311	0.000483207	0.000200683	0.000577519	0	8.61729e-05	0.00408083	0	0.000794872	0	0	0.002469	0.000221231	0.00162523	0	0.00107887	0.00117338	0.00234983	0.00303879	0	0	0	0
851	C9H13NO4H	200.092	6.65415e-06	6.08669e-06	1.46394e-05	1.4854e-06	6.0438e-06	6.0147e-06	6.82069e-06	4.27591e-06	5.76398e-06	4.89823e-06	0.00441656	0.000106863	0.000151766	0.000577635	0	0.000270658	0.0023846	0	0.000563573	0	0.000640006	0.0015584	0.000282765	0.000982725	0.000320003	0.000785972	0.000607096	0.00151613	0.0019213	0	4.768e-08	2.384e-08	3.37148e-08
852	C10H17NO3H	200.128	0.000177244	0.000408031	0.00025794	0.000226592	1.03731e-05	2.54009e-05	0.000184263	0.000150211	0.000174774	0.000112356	0.0111151	0.00103543	0.000130119	0.0122277	0.00119267	0.00117476	0.0258794	0	0	0.00256326	0	0.00409355	0.00486506	0.00862645	0.00128163	0.00471667	0.00302744	0.00736727	0.00955423	3.58415e-05	3.35242e-05	3.46829e-05	1.63862e-06
853	C11H21NO2H	200.165	0.000190121	0.00032546	0.000138406	0.000131884	7.90946e-06	1.73479e-05	0.000135188	0.000117753	0.000106738	7.98411e-05	0.0140635	0.00183776	0	0.0205431	0.00319682	0.00130626	0.0357143	0	0.000256751	0.00740647	0.000239717	0.00530042	0.00834872	0.0119904	0.00382309	0.00736565	0.00361336	0.0103458	0.0128066	3.62561e-05	5.84793e-05	4.73677e-05	1.57141e-05
854	C12H25NOH	200.201	0.000268786	0.000160363	7.80045e-05	0.000179569	1.71102e-05	1.20089e-05	0.000119307	0.000101315	0.000110994	7.75097e-05	0.00306445	0.000456124	1.70352e-05	0.00410926	0.00286458	0.000686164	0.0103486	0	0.000139568	0.00209337	0	0.0011792	0.00255333	0.00349606	0.00104668	0.00206882	0.00117018	0.00274101	0.00359187	1.62987e-05	1.61605e-05	1.62296e-05	9.76704e-08
855	C13H12O2H	201.091	4.47493e-05	7.36768e-05	0.000146317	0.00011908	3.38667e-05	7.82879e-05	8.2663e-05	4.31196e-05	0.000100541	4.18943e-05	0.0299612	0.00540249	0.000278077	0	0	0	0.000699546	0.0017576	0.000629851	0	0	0.0118806	0	0.001029	0	0.00322739	0.00578915	0.00823752	0.0130455	1.2312e-05	6.59788e-05	3.91454e-05	3.79482e-05
856	C14H16OH	201.127	0.000325057	0.000433945	0.000280263	0.000306041	0.000106057	0.000222656	0.000279003	0.000109495	0.000263663	8.10346e-05	0.112386	0.032185	0.000293633	0.0444862	0.00762086	0.00555778	0.125524	0.00446747	0	0.000338125	0	0.048288	0.0192216	0.0433306	0.000169063	0.0277523	0.0223458	0.0533394	0.0586655	0.000267175	0.000334188	0.000300682	4.73856e-05
857	C11H20O3H	201.149	0.000245003	0.000571105	0.000312737	0.000384631	7.88546e-05	5.0248e-05	0.000273763	0.000195447	0.000276197	0.000152005	0.0486456	0.0269423	0.00132245	0.159172	0.0175711	0.015091	0.0800257	0.00704238	0.00199425	0.00355295	0	0.0256368	0.0639448	0.0296874	0.00177648	0.0302614	0.0256104	0.0347618	0.0348752	0.000395023	0.000501074	0.000448048	7.49894e-05
858	C15H20H	201.164	0.00438336	0.00788004	0.00210488	0.00235946	0.000262309	0.00022916	0.00286987	0.00289865	0.00196684	0.00188379	1.31087	0.465484	0.00299171	1.47696	0.267808	0.120668	3.55127	0.0291427	0.0131592	0.699778	0.00481353	0.593116	0.621813	1.19786	0.352296	0.691271	0.358698	1.04032	1.24466	0.0020893	0.00620999	0.00414964	0.00291377
859	C12H24O2H	201.185	0.000147482	0.000598243	0.000421152	0.000838252	0.000235187	0.000341359	0.000430279	0.00025325	0.000557119	0.000285525	0.0670525	0.0297308	0.000159358	0.135697	0.00241407	0.00410519	0.125466	0.00090415	0	0.0046055	0.000578641	0.0323142	0.0474055	0.0421235	0.00259207	0.0311088	0.020013	0.0447391	0.0486446	0.000214729	0.000250191	0.00023246	2.50757e-05
860	C13H28OH	201.221	1.83834e-05	3.50579e-05	1.02073e-05	8.3376e-06	9.26706e-06	0	1.35422e-05	1.20519e-05	9.05395e-06	8.14427e-06	0	0	8.68609e-06	0.00675703	0.000728656	0.000486823	0	0	0	0	0	2.89536e-06	0.0026575	0	0	0.000665099	0.00132827	0.000210251	0.0012062	0	9.38288e-07	4.69144e-07	6.63469e-07
861	C7H7NO6H	202.035	3.79515e-06	1.14976e-05	6.66202e-06	1.11787e-05	9.32169e-07	5.44592e-06	6.58527e-06	4.15398e-06	7.64008e-06	3.9276e-06	0.000735919	3.40675e-05	6.97046e-05	0	0.000157097	2.38721e-06	1.58077e-06	0	0	5.0793e-05	9.74548e-05	0.000279897	5.31614e-05	5.26923e-07	7.41239e-05	0.000101927	0.000122619	0.000194966	0.000312549	1.12431e-05	3.74769e-06	7.49538e-06	5.30003e-06
862	C8H11NO5H	202.071	4.85452e-06	1.28939e-05	2.01273e-05	1.30455e-05	5.22534e-06	1.81713e-05	1.23863e-05	6.35749e-06	1.37293e-05	5.14165e-06	0.00598399	0.0185727	0.000376543	0	0	0	0.00597767	0.000472623	0.000943443	0	4.13924e-06	0.00831107	0	0.00246458	2.06962e-06	0.00269443	0.00392038	0.00570258	0.00713148	0	0	0	0
863	C9H15NO4H	202.107	1.62523e-05	2.36911e-05	2.78565e-05	2.51052e-05	1.15626e-05	2.69049e-05	2.18954e-05	6.52332e-06	2.34872e-05	5.71303e-06	0.00308812	0.0149437	9.90265e-05	0.000336105	0	8.93177e-05	0.00615838	0.000223916	0.000179191	0	0	0.00604363	0.000141808	0.00218716	0	0.00209315	0.00281686	0.00434852	0.00578152	0	0	0	0
864	C10H19NO3H	202.144	0.000424029	0.000588612	0.00025193	0.000124981	2.9992e-05	4.22406e-05	0.000243631	0.000224456	0.000151604	0.000160143	0.0136419	0.00283058	8.0053e-05	0.0233837	0.00331095	0.00224707	0.0317216	0.000834573	0.000132243	0.00719981	0.000294527	0.00551751	0.00964723	0.0108961	0.00374717	0.00745201	0.00337388	0.00997519	0.0113267	8.99126e-05	8.14391e-05	8.56758e-05	5.99164e-06
865	C11H23NO2H	202.18	0.000194734	0.000313544	0.000145784	9.02882e-05	2.47505e-05	1.50392e-05	0.00013069	0.000113133	9.23162e-05	7.85196e-05	0.0159044	0.00571846	7.89587e-05	0.0322281	0.00469409	0.00143622	0.0442162	0.00026471	0.000212798	0.0131063	0	0.00723394	0.0127862	0.0148979	0.00655317	0.0103678	0.0041127	0.0135351	0.0154498	4.30851e-05	5.44308e-05	4.8758e-05	8.02258e-06
866	C12H10O3H	203.07	0	7.9713e-07	2.69803e-05	3.71963e-05	7.36542e-06	3.46713e-05	1.78351e-05	1.70877e-05	2.74922e-05	1.60818e-05	0.0148	0.000647677	0.000203066	0	0	0	0	0.000484435	0.000490845	2.4078e-05	0	0.00521692	0	0.000325093	1.2039e-05	0.00138851	0.0025567	0.00363093	0.00652377	0	3.13722e-06	1.56861e-06	2.21835e-06
867	C13H14O2H	203.107	7.90779e-05	0.000206434	0.000558027	0.000408579	2.16513e-05	0.000134849	0.00023477	0.000207438	0.000316071	0.000205234	0.050455	0.00120391	0.00026678	0	0	0.00294436	0.018154	0.0013956	0	0	0	0.0173086	0.000981452	0.00651653	0	0.00620164	0.0079409	0.0149283	0.0222187	0	5.76552e-05	2.88276e-05	4.07684e-05
868	C14H18OH	203.143	0.000603531	0.000888316	0.000467357	0.000558789	8.86353e-05	0.000121366	0.000454666	0.00030538	0.000417276	0.000227219	0.188073	0.0545273	0.00101277	0.189149	0.0294011	0.0178503	0.252889	0.00449229	0.00114488	0.0158233	0	0.0812044	0.0788002	0.0861752	0.00791166	0.0635229	0.0372011	0.10049	0.105084	0.00029663	0.000510872	0.000403751	0.000151492
869	C15H22H	203.179	0.00832544	0.0130355	0.00424403	0.00621907	0.000715659	0.000741255	0.00554683	0.00474098	0.00451517	0.00323195	2.05378	0.705757	0.0144011	2.87363	0.628225	0.219701	5.4069	0.049519	0.036	1.16264	0.0243117	0.924646	1.24052	1.83081	0.593475	1.14736	0.526678	1.62911	1.88628	0.0017259	0.00508743	0.00340666	0.00237696
870	C11H8O4H	205.05	0.000934671	0.00112092	2.71335e-05	0.00111578	0.000938424	0.00352571	0.0012771	0.00117482	0.00124758	0.00105499	0.0172516	0.0019736	0	0	0	0	0	0	0	0	0	0.0064084	0	0	0	0.0016021	0.0032042	0.0043305	0.00762379	0	0	0	0
871	C12H12O3H	205.086	0.0377215	0.0644028	0.000183995	0.00197151	0.00542746	0.0435443	0.0255419	0.0267798	0.0124689	0.0233221	0	0.0609064	0.0115478	0.0254397	0.00706834	0.0354858	0.285168	0.0608189	0	0	0.140812	0.0241514	0.0226646	0.115329	0.0704062	0.0581378	0.0441013	0.074566	0.0999745	0	0.03634	0.01817	0.0256963
872	C13H16O2H	205.122	0.00272441	0.00462917	0.00704589	0.00404747	0.00628251	0.00901724	0.00562445	0.00227386	0.00571979	0.00189343	0.0840557	0.00696542	0.00599362	0	0	0.0010727	0.14092	0.0147215	0.00126727	0	0	0.0323382	0.000357567	0.0523028	0	0.0212496	0.0256598	0.0450286	0.0576606	0.00672786	0.00453684	0.00563235	0.00154928
873	C14H20OH	205.159	0.000263362	0.000297267	0.000238138	0.000258984	0.000169326	5.22514e-05	0.000213221	8.95889e-05	0.000211064	7.55175e-05	0.196814	0.0612343	0.00144612	0.229903	0.055086	0.0230946	0.227724	0.00325845	0	0.0173445	0.000134219	0.086498	0.102695	0.0769943	0.00873934	0.0687316	0.0413782	0.101421	0.100502	0.000227579	0.000138725	0.000183152	6.28293e-05
874	C15H24H	205.195	0.00437366	0.00316634	0.00298174	0.00581602	0.00101399	0.000283237	0.00293916	0.00205658	0.00351544	0.00229004	2.76496	1.08801	0.0801026	3.61194	1.36818	0.513552	6.9975	0.0870478	0.0780619	1.56761	0.14578	1.31102	1.83122	2.38754	0.856696	1.59662	0.660717	2.19586	2.40202	0.00200289	0.00343225	0.00271757	0.00101071
875	C7H11NO6H	206.066	2.96667e-06	3.34743e-05	4.18811e-06	2.44191e-05	3.13338e-06	2.53507e-05	1.55887e-05	1.36937e-05	1.71742e-05	1.07625e-05	0.00655104	0.000226488	0	0.00115996	0	0	0.0021662	0	0	0	0.000418441	0.00225917	0.000386654	0.000722065	0.00020922	0.000894279	0.000934449	0.00195479	0.00283067	0	0	0	0
876	C11H11NO3H	206.081	6.31624e-05	0.000198853	8.4138e-05	0.000173391	8.35126e-06	5.03751e-05	9.63785e-05	7.42298e-05	0.000109678	6.7669e-05	0.00215373	0.00104806	4.05293e-05	0	0.000283697	0.000297293	0	0	0.000452768	0.000192218	0	0.00108077	0.000193663	0.000150923	9.61092e-05	0.000380367	0.000468641	0.00072797	0.000932714	8.66945e-05	7.95514e-05	8.31229e-05	5.05096e-06
877	C8H15NO5H	206.102	7.35224e-06	2.51783e-05	3.3303e-05	4.44087e-05	1.08846e-05	2.69423e-05	2.46782e-05	1.38529e-05	3.24324e-05	1.4794e-05	0.00406956	0.00132407	0	0.000504429	0	0.000104708	0.000636659	0.00010233	0.000555726	0.00130647	0.00134058	0.00179788	0.000203045	0.000431572	0.00132353	0.000939005	0.000749365	0.00150553	0.00158464	2.33518e-05	2.98041e-05	2.65779e-05	4.56247e-06
878	C12H15NO2H	206.118	1.70674e-06	1.65611e-05	2.94915e-05	3.82539e-05	0	1.94938e-05	1.75845e-05	1.50666e-05	2.5699e-05	1.62664e-05	0.00236986	0.000979085	3.21497e-05	0.000925757	0.000300155	0.000359625	0.0057603	0	0.000149295	0.000250095	0.000346357	0.00112703	0.000528512	0.00196987	0.000298226	0.000980909	0.000746124	0.00170925	0.00207949	0	2.81187e-06	1.40594e-06	1.98829e-06
879	C9H19NO4H	206.139	4.85077e-07	2.89684e-06	8.67805e-06	9.23754e-06	0	6.75017e-07	3.66209e-06	4.22512e-06	5.83266e-06	4.66869e-06	0.000891131	0.000249983	0.000101195	0	0	0	0.000103482	0	0	0	0	0.000414103	0	3.44941e-05	0	0.000112149	0.000201958	0.000273333	0.000384818	0	0	0	0
880	C13H19NOH	206.154	8.21022e-06	1.3172e-05	1.32727e-05	8.78879e-06	2.78686e-06	1.58365e-06	7.96902e-06	4.97106e-06	7.7846e-06	4.16252e-06	0.00472867	0.000653215	4.16108e-06	0.00718568	0.00111472	0.000594992	0.0123587	0	5.88921e-05	0.00211872	0.0004349	0.00179535	0.00296513	0.00413921	0.00127681	0.00254412	0.00127649	0.00354945	0.00440606	9.66617e-06	9.10432e-06	9.38525e-06	3.97289e-07
881	C14H23NH	206.19	0.000126008	0.000227485	0.00015318	0.000229595	4.85571e-05	1.11335e-05	0.00013266	9.02168e-05	0.000150074	8.86252e-05	0.00589751	0.00223237	0.000530943	0.00773201	0.00803792	0.00500719	0.0288235	0	0.00176929	0.0142085	0.00315274	0.00288694	0.00692571	0.0101976	0.00868062	0.00717272	0.0031545	0.00798867	0.00966977	9.78973e-05	8.31827e-05	9.054e-05	1.04048e-05
882	C11H10O4H	207.065	0.000421374	0.00140003	0.000227883	0.000308525	0.000808395	0.000787714	0.000658987	0.000436617	0.00049689	0.000346571	0.027531	0.00277036	0.00104908	0.00142582	0	0.00101757	0.0027477	0.0110784	0	0	0	0.0104501	0.000814462	0.0046087	0	0.00396833	0.00476509	0.0087209	0.0117856	0.000166522	5.55072e-05	0.000111014	7.8499e-05
883	C12H14O3H	207.102	9.65178e-06	5.0232e-05	9.83014e-05	4.32045e-05	0.00019161	1.46386e-06	6.5744e-05	7.06106e-05	6.95174e-05	6.00801e-05	0.0188456	0.000873275	0.00165557	0	0	0	0.014125	0	0.00165806	0	0.000653453	0.00712482	0	0.00526102	0.000326726	0.00317814	0.00356585	0.00697494	0.00892383	0	6.43551e-05	3.21776e-05	4.55059e-05
884	C16H14H	207.117	0.000439208	0.000831692	0.000452348	0.000601161	0.000203007	0.000281507	0.000468154	0.000226309	0.000467352	0.000172577	0.0322032	0.00750858	0.00724435	0.0118511	0.00620051	0.0156427	0.0320074	0.00306208	0.00271291	0	0.00242445	0.015652	0.0112314	0.0125941	0.00121223	0.0101725	0.00625293	0.015593	0.0144661	9.54977e-05	0.000269919	0.000182708	0.000123335
885	C13H18O2H	207.138	0.000150395	0.000125379	0.000165277	8.98644e-05	6.68619e-05	0.000222961	0.00013679	5.59361e-05	0.000124692	5.48178e-05	0.0510272	0.00346789	0.00248314	0.00558916	0	0	0.00911154	0.00275279	0.00259798	0	0.000393545	0.0189927	0.00186305	0.00482077	0.000196772	0.00646833	0.00856575	0.0146499	0.0217143	0	8.14544e-05	4.07272e-05	5.7597e-05
886	C14H22OH	207.174	0.00812229	0.00192526	0.000384893	0.000569612	0.000401811	0.000200977	0.00193414	0.00309539	0.000739036	0.00179595	0.208234	0.0591512	0.00339633	0.19685	0.0495191	0.0281404	0.317901	0.0066865	0	0.269874	0.00194343	0.0902605	0.0915031	0.108196	0.135909	0.106467	0.0212632	0.133943	0.123272	5.94292e-05	0.000403016	0.000231222	0.000242952
887	C15H26H	207.211	0.00183118	0.00231443	0.00196219	0.00439845	0.00102378	0.000671839	0.00203364	0.00131084	0.00266518	0.00168124	1.57813	0.731279	0.110053	1.78351	0.929834	0.471247	4.52371	0.0762898	0.118872	1.14355	0.250863	0.806489	1.06153	1.57296	0.697204	1.03455	0.390053	1.39244	1.50756	0.00165431	0.00178349	0.0017189	9.13472e-05
888	C9H5NO5H	208.024	5.38771e-05	0.000124407	3.4433e-05	2.6267e-05	3.70316e-06	7.44909e-06	4.16894e-05	4.44896e-05	2.66779e-05	2.87676e-05	0.000493869	5.73224e-06	0	2.31525e-05	0	0	0.000259226	1.56409e-06	0.000150694	0	0.000171159	0.000166534	7.7175e-06	0.000137161	8.55795e-05	9.92479e-05	6.95927e-05	0.000176135	0.000212103	0	4.01585e-06	2.00793e-06	2.83964e-06
889	C10H9NO4H	208.06	1.33479e-05	1.67165e-05	1.38622e-05	1.65907e-05	8.63538e-06	1.79959e-05	1.45248e-05	3.39498e-06	1.49659e-05	3.06201e-06	0.00488211	0.00095382	4.89769e-05	0.000532798	0	0	0.0026023	0	4.68395e-05	0	0	0.00196164	0.000177599	0.000883046	0	0.000755571	0.000889903	0.00172413	0.00216841	1.91804e-05	1.23919e-05	1.57861e-05	4.80013e-06
890	C11H13NO3H	208.097	3.00826e-05	4.89698e-05	4.83143e-05	2.22916e-05	5.23544e-06	1.79254e-05	2.88032e-05	1.73504e-05	2.53864e-05	1.46006e-05	0.0226478	0.00482797	0.000598585	0.00631044	0	0	0.016485	0.000241911	0.000377403	0	0.000285365	0.00935813	0.00210348	0.00570145	0.000142683	0.00432644	0.00406833	0.00895332	0.0103749	0	2.32529e-05	1.16265e-05	1.64423e-05
891	C12H17NO2H	208.133	0.000488985	5.40232e-05	7.23454e-05	9.47491e-05	2.80579e-05	7.25566e-05	0.00013512	0.000174782	8.67319e-05	8.87329e-05	0.00519481	0.00203511	0.000275624	0.00161074	0	0	0.00870121	0	0	0.0145143	0	0.00250185	0.000536915	0.0029004	0.00725715	0.00329908	0.00283375	0.00393116	0.00419073	9.17884e-06	2.14927e-05	1.53358e-05	8.70723e-06
892	C13H21NOH	208.17	0.000732685	8.57662e-05	5.55791e-05	6.43598e-05	3.55849e-05	2.16274e-05	0.000165934	0.000278548	7.26479e-05	0.000149929	0.00701978	0.00238662	0.00019708	0.00630143	0.0014241	0.000753113	0.0141247	0	0	0.0245888	0	0.00320116	0.00282621	0.00470822	0.0122944	0.0057575	0.0044332	0.00608421	0.00687427	2.17897e-05	2.85976e-05	2.51937e-05	4.81386e-06
893	C14H25NH	208.206	8.89617e-05	7.9054e-05	7.63898e-05	0.000154369	1.71195e-05	1.78337e-05	7.22879e-05	5.11599e-05	9.18237e-05	6.16872e-05	0.0108254	0.00511664	0.00125621	0.0157811	0.0087144	0.00366362	0.0274339	0.000772582	0.00138863	0.00789009	0.00255524	0.00573275	0.00938637	0.00986503	0.00522267	0.0075517	0.00241181	0.00931581	0.00892712	3.79861e-05	4.00682e-05	3.90271e-05	1.47225e-06
894	C10H8O5H	209.044	0.000106328	0.000367541	7.02001e-05	0.000160608	0.000233241	0.000255689	0.000198935	0.000109035	0.000176936	7.74964e-05	0.00774417	0.000898101	0.0003407	0.00112743	0	0.000192578	0	0.00323043	0	0	0	0.00299432	0.000440003	0.00107681	0	0.00112778	0.00132054	0.00238901	0.00334132	2.12986e-05	7.09954e-06	1.41991e-05	1.00403e-05
895	C11H12O4H	209.081	7.92262e-05	0.000598406	0.000134401	0.000229286	0.000380928	0.000611033	0.00033888	0.00022997	0.00030568	0.000172803	0.0241156	0.00347959	0.00103236	0.00328275	0	0.00343853	0.00217643	0.00640787	0.00216893	0	0	0.00954252	0.00224043	0.00358441	0	0.00384184	0.00407792	0.00759158	0.00996195	0.000118088	0.000151661	0.000134874	2.37395e-05
896	C12H16O3H	209.117	0.000135655	0.000260619	0.00038578	0.000112429	6.75682e-05	7.61162e-05	0.000173028	0.000125314	0.000159463	0.000117314	0.0405823	0.00972957	0.000412056	0.00790234	0	0.0037435	0.0252797	0.00247463	0.000587675	0	0.000722384	0.016908	0.00388195	0.00944735	0.000361192	0.00764962	0.00721724	0.015706	0.0178392	4.17093e-05	9.79684e-05	6.98389e-05	3.97812e-05
897	C16H16H	209.132	0.000619415	0.00121606	0.00135414	0.000995085	8.86498e-05	0.000264451	0.0007563	0.000516182	0.000809411	0.000456966	0.0475049	0.028729	0.000404689	0.0376996	0.00765908	0.0166026	0.172112	0.00611399	0	0	0	0.0255462	0.0206537	0.0594086	0	0.0264021	0.0246325	0.0451538	0.0606403	0	0.000663857	0.000331929	0.000469418
898	C13H20O2H	209.154	0.000395257	0.000363661	0.000328933	0.000228604	2.32701e-05	9.74453e-05	0.000239528	0.000151478	0.000206856	0.000115512	0.137595	0.0228554	0.000365183	0.0569793	0	0.00899214	0.159308	0.00582687	0.000244913	0.0109806	0	0.0536052	0.0219905	0.0551266	0.00549029	0.0340531	0.0244112	0.0639183	0.0732066	0.000291213	0.000405829	0.000348521	8.10455e-05
899	C14H24OH	209.19	0.000166984	0.000184055	9.95577e-05	0.000307706	3.59328e-05	5.95814e-05	0.000142303	9.96948e-05	0.00017784	0.000121977	0.266347	0.066792	0.000948289	0.22733	0.0477499	0.0211716	0.438105	0.00708476	0.00228074	0.0575372	0.000763887	0.111362	0.0987504	0.149157	0.0291505	0.097105	0.0501105	0.154424	0.168711	0	0.000226698	0.000113349	0.0001603
900	C15H28H	209.226	0.000909159	0.00120018	0.0012628	0.00362773	0.000414385	0.000391469	0.00130095	0.00119935	0.00198877	0.00159858	0.665879	0.274598	0.0167496	0.682267	0.364043	0.137615	1.58187	0.0313291	0.0323215	0.323877	0.039984	0.319075	0.394642	0.548509	0.181931	0.361039	0.152878	0.509013	0.542704	0.0011553	0.00141111	0.00128321	0.000180889
901	C9H7NO5H	210.04	2.89245e-05	5.67554e-05	4.53753e-05	3.62606e-05	7.19408e-06	5.15943e-06	2.99449e-05	2.06386e-05	2.94078e-05	1.64222e-05	0.00143879	0.000113551	0.00025646	0.000153014	0.000287686	0.00023578	0.00022897	0.000262385	0.000207404	0.000176506	0.000483866	0.000602935	0.000225493	0.00023292	0.000330186	0.000347883	0.000176598	0.000506832	0.000541916	0	3.19709e-06	1.59854e-06	2.26068e-06
902	C10H11NO4H	210.076	3.09366e-05	6.88478e-05	7.56615e-05	3.83206e-05	9.09566e-06	1.36022e-05	3.94107e-05	2.77083e-05	3.82707e-05	2.3185e-05	0.0109254	0.00164542	1.0465e-05	0.00154588	0	9.03155e-05	0.00187622	0.000454042	7.56765e-05	0	0	0.00419376	0.000545398	0.000801978	0	0.00138528	0.00190195	0.00320897	0.00466045	0	5.96019e-06	2.98009e-06	4.21449e-06
903	C11H15NO3H	210.112	5.19522e-05	0.000114251	0.000128851	6.90746e-05	7.376e-06	3.61612e-05	6.79443e-05	4.64534e-05	6.73935e-05	3.9193e-05	0.0154647	0.00380133	8.01645e-05	0.00854394	0.000562506	0	0.0185217	0.000202501	0.000162639	4.05628e-05	0	0.00644875	0.00303548	0.0062956	2.02814e-05	0.00395003	0.00305639	0.0074379	0.00839846	0	2.23608e-05	1.11804e-05	1.58115e-05
904	C12H19NO2H	210.149	0.000188243	0.000289387	0.000117365	5.36123e-05	1.18252e-05	1.65109e-05	0.000112824	0.000109422	6.82496e-05	7.79531e-05	0.0072982	0.00152316	0	0.00729289	0.000787708	0.000732148	0.0157183	0.00018197	8.69551e-05	0.00130013	0.000272221	0.00294045	0.00293758	0.00532909	0.000786175	0.00299832	0.0018559	0.0047779	0.00578489	9.21233e-06	2.06815e-05	1.49469e-05	8.10992e-06
905	C14H27NH	210.222	0.000174287	8.36247e-05	8.45585e-05	0.000232317	8.16432e-06	1.36088e-05	9.94268e-05	8.88013e-05	0.000127241	0.000100756	0.00792559	0.00183034	0.000243303	0.0100372	0.00502472	0.0018071	0.0214337	0.000144946	0.000790231	0.0058174	0.00138235	0.00333308	0.00562302	0.00745628	0.00359988	0.00500306	0.00192877	0.00647372	0.00729752	5.05581e-05	5.01517e-05	5.03549e-05	2.8738e-07
906	C10H10O5H	211.06	4.71655e-06	0.000144446	0	2.83406e-05	9.32044e-05	0.00010266	6.2228e-05	5.94683e-05	4.89474e-05	4.50766e-05	0.00116195	0	0.00023887	0	0	0	0.00228432	0	0.00064802	0	0	0.000466941	0	0.000977448	0	0.000361097	0.000466145	0.000677127	0.000893152	1.61498e-05	4.18734e-05	2.90116e-05	1.81894e-05
907	C11H14O4H	211.096	0.00011747	0.000141717	0.000285683	8.60144e-05	0.000108883	0.000102705	0.000140412	7.34939e-05	0.000133713	7.53496e-05	0.0239063	0.00100939	0.000115979	0.00167067	0	0.00486362	0.0328042	0.000756513	0.0013286	0	0	0.00834388	0.0021781	0.0116298	0	0.00553794	0.00538334	0.0111048	0.0144661	2.01626e-05	0.00018671	0.000103436	0.000117767
908	C12H18O3H	211.133	0.000838112	0.00143255	0.00132216	0.000419726	0.00015651	7.47605e-05	0.000707304	0.000584351	0.000556256	0.000490129	0.0824153	0.0178278	0.000262777	0.0450253	0	0.0113516	0.133589	0.00336515	0.00221158	0	0	0.033502	0.0187923	0.0463886	0	0.0246707	0.0199404	0.0450246	0.0536008	0.000399401	0.00062046	0.000509931	0.000156312
909	C16H18H	211.148	0.025327	0.0348419	0.00807118	0.00357546	0.000395239	0.00110425	0.0122192	0.0144144	0.00562053	0.0101937	0.248583	0.121917	0.0011618	0.300234	0.0435703	0.0500899	0.720749	0.0136697	0.0010069	0.0442039	0	0.123887	0.131298	0.245142	0.0221019	0.130607	0.0911723	0.206368	0.25362	0.00149085	0.00279302	0.00214193	0.00092077
910	C13H22O2H	211.169	0.000535292	0.00108963	0.00100663	0.000408882	0.000114231	0.000276937	0.000571934	0.000395327	0.000491569	0.000324505	0.171065	0.0206145	0.000218984	0.100366	0	0.012471	0.262269	0.00182039	0.00153977	0.0287739	0	0.0639661	0.0376123	0.0885431	0.0143869	0.0511271	0.0321314	0.0894024	0.106974	0.000224165	0.000542786	0.000383476	0.000225299
911	C14H26OH	211.206	0.000312125	0.000256853	0.000155506	0.000536044	8.27798e-05	9.56681e-05	0.000239829	0.000170773	0.000306013	0.000214104	0.299321	0.0783585	0.00113984	0.294504	0.0710698	0.0270754	0.550278	0.00531366	0.00313924	0.0709489	0	0.126273	0.130883	0.186244	0.0354744	0.119719	0.062424	0.184788	0.205611	0.000146578	0.000476374	0.000311476	0.000233201
912	C15H30H	211.242	0.00487591	0.00283328	0.00302702	0.0135894	0.000461406	0.000729246	0.00425271	0.00485527	0.00681139	0.00644802	0.909346	0.376495	0.0183589	1.02851	0.610132	0.166374	2.68757	0.0235741	0.0447389	0.584911	0.0363693	0.434733	0.601672	0.918626	0.31064	0.566418	0.263348	0.788578	0.915377	0.000966826	0.00149611	0.00123147	0.000374257
913	C8H5NO6H	212.019	3.64194e-06	9.28129e-06	1.40035e-05	9.81281e-06	5.37233e-06	2.63476e-06	7.45778e-06	4.33335e-06	8.60913e-06	3.92342e-06	0.000327175	0	0	0.000103343	0.000104685	2.54523e-05	0.0010755	0	0.000151624	0	5.00965e-06	0.000109058	7.78269e-05	0.000409041	2.50482e-06	0.000149608	0.000178644	0.000257788	0.000391502	0	0	0	0
914	C9H9NO5H	212.055	5.03984e-06	5.50473e-06	1.25275e-05	3.13199e-06	7.76246e-06	5.10587e-06	6.51206e-06	3.29646e-06	6.11091e-06	3.52487e-06	0.00249254	4.17599e-05	0.000182947	0.000231899	0.000333549	0.000351152	0.00152186	0	0.000146006	0	0	0.000905749	0.000305533	0.000555956	0	0.00044181	0.000383856	0.000859847	0.00111494	0	1.10549e-05	5.52744e-06	7.81698e-06
915	C10H13NO4H	212.092	7.19606e-06	3.87414e-06	2.82548e-05	6.24477e-06	1.01245e-05	6.82965e-06	1.04207e-05	8.96362e-06	1.10603e-05	8.50919e-06	0.00421614	0.000264285	6.56926e-06	0.000930891	0	0	0.00474524	0	9.58095e-05	0	0	0.00149567	0.000310297	0.00161368	0	0.000854911	0.000819304	0.00179652	0.00231031	0	1.69396e-05	8.46979e-06	1.19781e-05
916	C11H17NO3H	212.128	5.86575e-05	0.000121977	0.00010864	4.48549e-05	7.05504e-06	9.25487e-06	5.84065e-05	4.85822e-05	4.95821e-05	3.90197e-05	0.0076409	0.00165022	4.30193e-05	0.0053885	0.000762216	0.00134369	0.0160798	0.000291222	0.000313558	0.00070486	0.000240798	0.00311138	0.00249814	0.00556153	0.000472829	0.00291097	0.00209608	0.0048743	0.00596209	3.35109e-05	5.48429e-05	4.41769e-05	1.5084e-05
917	C12H21NO2H	212.165	4.77518e-05	8.50414e-05	7.88079e-05	3.14159e-05	1.27452e-05	2.09004e-05	4.61104e-05	3.01733e-05	3.88617e-05	2.51882e-05	0.00579225	0.00155422	1.15231e-05	0.00440273	0.000443383	0.000566449	0.0110895	0.000191405	0.0002064	0.00108296	4.03152e-05	0.00245267	0.00180419	0.00382909	0.00056164	0.00216189	0.0013605	0.00359634	0.00415173	2.82269e-05	3.2749e-05	3.04879e-05	3.19758e-06
918	C13H25NOH	212.201	2.59397e-05	2.57845e-05	3.30918e-05	7.92e-05	1.01979e-05	1.29243e-05	3.11897e-05	2.50586e-05	4.54914e-05	3.31976e-05	0.00420922	0.00129718	4.45302e-05	0.00513547	0.0016818	0.000730891	0.00928075	3.89879e-05	8.20498e-05	0.00178869	0	0.00185031	0.00251605	0.00313393	0.000894346	0.00209866	0.000958827	0.00297209	0.00329449	2.46381e-05	1.72967e-05	2.09674e-05	5.19118e-06
919	C14H29NH	212.237	9.32741e-05	0.000103079	6.39558e-05	0.000206143	9.83027e-06	1.28355e-05	8.15196e-05	7.2525e-05	0.000110765	9.05956e-05	0.00333599	0.00161846	0.000132337	0.00410248	0.0023321	0.000861087	0.0119438	0.00013746	0.000749338	0.00476571	0.000628369	0.0016956	0.00243189	0.00427687	0.00269704	0.00277535	0.00108697	0.00352032	0.00396502	6.44547e-05	5.10695e-05	5.77621e-05	9.46474e-06
920	C9H8O6H	213.039	1.84288e-05	2.2367e-05	2.70054e-05	2.55561e-05	1.83117e-05	2.85684e-05	2.33729e-05	4.3824e-06	2.48217e-05	3.66783e-06	0.0104415	0.000698512	0.000945195	0.000241315	0	0	0	0.000257597	0.00116101	0	0.00023198	0.0040284	8.04384e-05	0.00047287	0.00011599	0.00117442	0.00191088	0.00271587	0.00451852	0	1.95181e-05	9.75905e-06	1.38014e-05
921	C10H12O5H	213.076	0.000101523	9.39146e-05	9.19624e-05	1.77331e-05	2.48101e-05	4.67345e-05	6.27796e-05	3.75509e-05	4.34269e-05	3.70976e-05	0.0144121	0.00228071	0.000492142	0	0.000565089	0.00264142	0.00440105	0.000911424	0.00114478	0	0.000710383	0.0057283	0.00106884	0.00215242	0.000355192	0.00232619	0.0023854	0.00470732	0.00597746	0	8.83083e-05	4.41541e-05	6.24434e-05
922	C11H16O4H	213.112	0.00017695	0.000215946	0.000193839	0.000114016	0.000119609	0.000125501	0.000157644	4.3509e-05	0.000138376	4.00803e-05	0.0172986	0.00222141	0.000237363	0.00177104	0	0.000807844	0.0154674	0.000757319	0.000607789	0	0	0.0065858	0.000859628	0.00561083	0	0.00326406	0.00331545	0.00700804	0.00852283	0	0	0	0
923	C12H20O3H	213.149	0.000268077	0.000315551	0.000345456	0.000475181	0.00012279	0.000414997	0.000323675	0.000122703	0.000373264	0.000132155	0.0808069	0.0190746	0.000608114	0.0480701	0.00471841	0.0108297	0.124873	0.00353706	0.00172457	0	0	0.0334965	0.0212061	0.0433783	0	0.0245202	0.0186943	0.0437089	0.0504564	0.000553172	0.000439016	0.000496094	8.07208e-05
924	C16H20H	213.164	0.00124498	0.00194877	0.000713753	0.000733016	8.95187e-05	0.000201995	0.000822004	0.000691243	0.000617941	0.000458682	0.150127	0.0617344	0.000949462	0.1626	0.00556194	0.0260507	0.51093	0.00772434	0.000566168	0.0402933	0	0.0709369	0.0647376	0.173074	0.0201467	0.0822237	0.064654	0.134245	0.180006	0.000769589	0.00137099	0.00107029	0.000425252
925	C13H24O2H	213.185	0.000175245	0.000280755	0.000277581	0.000338275	9.26668e-05	0.000147323	0.000218641	9.43223e-05	0.000251755	0.000101065	0.204174	0.0487415	0.000343004	0.1517	0.0184856	0.01613	0.354022	0.00521528	0.00248677	0.0823031	0.000834227	0.0844196	0.0621051	0.120575	0.0415687	0.077167	0.0338177	0.122253	0.133819	0.000299458	0.000778954	0.000539206	0.000339055
926	C14H28OH	213.221	0.000766937	0.00149501	0.000285365	7.70843e-05	0.000382441	0.000176909	0.000530624	0.000528924	0.000263969	0.000406399	0.31472	0.108116	0.0013282	0.29454	0.0624716	0.0291207	0.615942	0.0118627	0.0045654	0.0776569	0.000916197	0.141388	0.128711	0.21079	0.0392866	0.130044	0.0704446	0.205057	0.225833	0.000440936	0.0006847	0.000562818	0.000172367
927	C15H32H	213.258	9.96596e-05	0.000134007	1.34993e-05	5.0743e-06	1.74012e-05	1.33182e-05	4.71599e-05	5.51972e-05	1.85012e-05	4.1292e-05	0.00266295	0.000498245	3.56137e-05	0.0102509	0.00191313	0.00105714	0.012674	0	0.000239974	0.000495169	0	0.0010656	0.00440705	0.00430466	0.000247584	0.00250622	0.00216213	0.0030776	0.00456148	0	2.05053e-05	1.02526e-05	1.44994e-05
928	C8H7NO6H	214.035	4.65074e-05	7.42531e-05	1.86338e-05	1.8624e-05	5.64482e-06	4.67367e-06	2.80561e-05	2.72079e-05	1.78051e-05	1.79747e-05	0.000678822	9.63695e-05	7.67966e-05	0.000123639	0.000106679	7.98749e-05	0.00277975	0	0.000239094	0.000215994	0.000425314	0.000283996	0.000103398	0.00100628	0.000320654	0.000428582	0.000396668	0.00067807	0.000971289	3.1847e-06	9.61813e-06	6.40142e-06	4.54913e-06
929	C9H11NO5H	214.071	5.67616e-06	3.75071e-06	8.84828e-06	6.13352e-06	3.72407e-06	1.2835e-05	6.82795e-06	3.49509e-06	7.19421e-06	2.91787e-06	0.00133967	0	0.000332379	0.000320131	0.000255037	0.000407326	0.00479477	0	0.000152681	0	0	0.000557349	0.000327498	0.00164915	0	0.0006335	0.000714681	0.00111271	0.00174087	0	0	0	0
930	C10H15NO4H	214.107	3.70535e-06	0	4.02215e-06	6.7062e-06	6.30138e-06	6.44883e-06	4.53065e-06	2.56961e-06	5.69944e-06	2.01444e-06	0.00216786	2.157e-06	0.000260141	0.000348635	0	9.4448e-05	0.00122379	0	0.000129925	0	8.73866e-05	0.000810054	0.000147694	0.000451239	4.36933e-05	0.00036317	0.000344459	0.000735765	0.000963378	0	0	0	0
931	C11H19NO3H	214.144	0.000577844	0.00103016	0.000461129	0.000376768	2.36917e-05	4.7811e-05	0.000419568	0.000373191	0.000322942	0.000253382	0.00912202	0.000979561	0	0.00977722	0.000395456	0.000807459	0.023184	0	0.000419829	0.00322854	0.000713232	0.00336719	0.00366005	0.00786795	0.00197088	0.00421652	0.00254341	0.00648901	0.00838105	7.02699e-06	4.56922e-05	2.63596e-05	2.73404e-05
932	C12H23NO2H	214.18	0.000641511	0.000998556	0.00025246	0.000205127	1.11604e-05	2.52431e-05	0.000355676	0.000388894	0.000205203	0.000260622	0.0111087	0.00217608	7.65118e-06	0.0155044	0.00160643	0.00145271	0.0287302	0	5.96954e-05	0.00483428	0.000110067	0.0044308	0.00618786	0.00959664	0.00247217	0.00567187	0.00302481	0.00826559	0.0102791	5.54846e-05	8.18741e-05	6.86793e-05	1.86602e-05
933	C13H27NOH	214.217	9.88708e-05	2.38709e-05	3.26608e-05	0.000158129	1.34728e-05	3.73528e-05	6.07261e-05	5.63336e-05	8.53357e-05	6.8678e-05	0.00332958	0.000364013	0	0.00444125	0.00179869	0.0004145	0.00894853	0	0.00011049	0.00181711	0	0.0012312	0.00221814	0.00301967	0.000908553	0.00184439	0.000961384	0.00252905	0.00317316	4.32578e-06	8.84961e-06	6.58769e-06	3.19883e-06
934	C4HF7O2H	214.994	0	9.61038e-05	5.74066e-05	0.000140581	0	4.70496e-05	5.68569e-05	5.49764e-05	8.23056e-05	6.04965e-05	0	0	0	0	0	0	0	0	0	0	0	0	0	0	0	0	0	0	0	5.76969e-06	1.92323e-06	3.84646e-06	2.71986e-06
935	C13H10O3H	215.07	2.07332e-05	6.95067e-06	2.22576e-05	7.18785e-06	2.31356e-05	2.05761e-05	1.68068e-05	7.60337e-06	1.49943e-05	7.62988e-06	0.00410311	0.000777599	0.000343472	0	0.000485068	0.00140124	0	0.000378798	0.000440995	0	0	0.00174139	0.000628769	0.000273264	0	0.000660857	0.000764973	0.00119973	0.00170418	0	0	0	0
936	C14H14O2H	215.107	4.09328e-05	1.86598e-05	8.57565e-05	3.00821e-06	3.41535e-05	7.3852e-05	4.27271e-05	3.17926e-05	3.64125e-05	3.48039e-05	0.00730299	0.000106515	0.000117564	0	0	0	0	0.0007988	0.000300763	0	0.000164574	0.00250902	0	0.000366521	8.22869e-05	0.000739458	0.00119011	0.00183595	0.00319954	0	3.00583e-06	1.50291e-06	2.12544e-06
937	C15H18OH	215.143	0.000256671	0.000332758	0.000245027	0.00019535	7.90939e-05	0.000146636	0.000209256	8.92606e-05	0.000187373	6.56033e-05	0.0869	0.0301971	0.000465221	0.0724696	0.00532334	0.0100741	0.125293	0.00565769	0.000445784	0	0	0.0391875	0.029289	0.0437988	0	0.0280688	0.0196673	0.0479963	0.0511323	0.000118578	0.000248198	0.000183388	9.16553e-05
938	C16H22H	215.179	0.00247742	0.00369383	0.00187267	0.00188951	0.000358241	0.000587309	0.00181317	0.00123345	0.00154736	0.000857187	0.959798	0.366445	0.00370361	1.09629	0.143102	0.130878	2.67238	0.0307691	0.00941494	0.402446	0.000769635	0.443316	0.456758	0.904187	0.201608	0.501467	0.292962	0.771046	0.938399	0.0038586	0.00810929	0.00598395	0.00300569
939	C7H5NO7H	216.014	3.66401e-05	5.70162e-05	1.1342e-05	7.48158e-06	5.4297e-06	1.72179e-06	1.99386e-05	2.20233e-05	1.01158e-05	1.53001e-05	0.000255466	0	3.74853e-05	0.000216653	2.48623e-05	2.97539e-05	0.000103431	0	2.12409e-05	0	0	9.76505e-05	9.04231e-05	4.15573e-05	0	5.74077e-05	4.56668e-05	8.59684e-05	0.000107902	0	7.28877e-06	3.64439e-06	5.15394e-06
940	C8H9NO6H	216.05	2.69442e-06	3.02372e-06	6.0609e-06	2.5821e-06	6.4353e-06	3.35685e-06	4.02555e-06	1.74676e-06	3.98481e-06	1.6557e-06	0.00188403	0	0.000390672	0.000161404	0.000129145	0.000343454	0.000255202	4.9968e-05	0.000323182	9.78015e-05	0.00057894	0.000758233	0.000211335	0.000209451	0.000338371	0.000379347	0.000259696	0.000583626	0.000757851	1.24575e-06	8.18044e-06	4.71309e-06	4.90357e-06
941	C9H13NO5H	216.087	4.87703e-06	6.83089e-06	1.47663e-05	4.69649e-07	7.56162e-06	4.65322e-05	1.35063e-05	1.68322e-05	1.18312e-05	1.5835e-05	0.00379719	0.00876487	2.40383e-05	0	0	0	0.00861359	0.000168323	0.000619965	0	0.000142474	0.00419537	0	0.00313396	7.1237e-05	0.00185014	0.00213977	0.00382612	0.00420863	0	0	0	0
942	C10H17NO4H	216.123	1.06042e-05	1.80887e-05	3.0306e-05	2.83971e-05	4.12367e-06	6.59562e-05	2.6246e-05	2.19026e-05	2.98167e-05	1.82946e-05	0.000908824	0.00607221	0.000269249	7.26464e-05	0	0	0.00676521	4.10919e-05	2.42526e-05	0	0	0.00241676	2.42155e-05	0.00227685	0	0.00117946	0.00134918	0.00236277	0.0031068	2.17649e-05	7.25496e-06	1.45099e-05	1.02601e-05
943	C11H21NO3H	216.159	0.000179026	0.000111976	0.000185614	9.37786e-05	7.98388e-05	5.75244e-05	0.00011796	5.29761e-05	0.00010694	4.50004e-05	0.0130342	0.00251789	0.000641762	0.0126213	0.000735559	0.000354428	0.0312043	0.000884334	0	0	0	0.00539796	0.00457042	0.0106962	0	0.00516614	0.00438479	0.0088761	0.011524	0	0	0	0
944	C12H25NO2H	216.196	9.09559e-05	9.8176e-05	0.000102024	7.85369e-05	4.10867e-05	2.55393e-05	7.27198e-05	3.19368e-05	7.03051e-05	2.67592e-05	0.0142361	0.00364019	3.16254e-05	0.023493	0.00337086	0.00223201	0.0357641	5.53701e-08	7.18289e-06	0.0173387	0.000378566	0.00596931	0.00969861	0.0119238	0.00885861	0.00911258	0.00246244	0.0114488	0.0126345	1.79233e-05	6.19712e-05	3.99473e-05	3.11466e-05
945	C12H8O4H	217.05	5.07329e-05	0	3.4469e-05	0.000259425	4.11167e-05	0.000200078	9.76369e-05	0.000105439	0.000155626	0.000120401	0.00161574	0	0.000296251	0	0	0	0.00406162	0	0.00233762	0	0	0.00063733	0	0.00213308	0	0.000692603	0.00100622	0.00114971	0.00153619	3.25488e-05	1.44513e-05	2.35001e-05	1.27969e-05
946	C13H12O3H	217.086	1.61864e-05	0	1.60227e-05	3.7038e-05	3.89526e-05	3.55422e-05	2.3957e-05	1.56683e-05	3.07965e-05	1.29563e-05	0.00435001	0.000992237	0.000405802	0	0	0	0.00193058	7.26947e-05	0.00146355	0	0	0.00191602	0	0.00115561	0	0.000767907	0.000939474	0.00159345	0.00184145	0	0	0	0
947	C14H16O2H	217.122	5.31171e-05	0.00010791	0.00017701	9.82322e-05	2.1121e-05	4.52267e-05	8.37696e-05	5.62774e-05	9.22578e-05	5.13784e-05	0.0167412	0	0.00026201	0	0	0	0.00928239	0.000465438	0.000549554	0	0	0.00566772	0	0.00343246	0	0.00227505	0.00278098	0.0054268	0.00766802	0	2.03465e-06	1.01732e-06	1.43871e-06
948	C15H20OH	217.159	0.000294652	0.000454452	0.000363844	0.000412291	0.000163026	0.0002608	0.000324844	0.000106925	0.000339489	9.48845e-05	0.112966	0.0325998	0.00043697	0.109862	0.0138327	0.0144261	0.176428	0.00391254	0.000172685	0.00630478	3.05029e-05	0.0486677	0.0460402	0.060171	0.00316764	0.0395116	0.0249943	0.0639282	0.0698468	0.000116267	0.000330023	0.000223145	0.000151148
949	C16H24H	217.195	0.00343432	0.00464875	0.00245085	0.00347253	0.000517197	0.000783201	0.00255114	0.00163105	0.00245707	0.00130621	1.4382	0.482764	0.00995896	1.72699	0.350005	0.187029	3.62901	0.0335814	0.0247935	0.50962	0.018852	0.643639	0.754675	1.22913	0.264236	0.72292	0.397463	1.08462	1.28229	0.00256508	0.0058512	0.00420814	0.00232363
950	C8H11NO6H	218.066	1.12436e-05	2.03734e-05	6.13116e-06	6.93765e-06	1.50395e-06	3.14556e-06	8.22255e-06	6.83681e-06	6.09201e-06	4.40582e-06	0.00244865	1.03202e-06	3.48288e-05	0.00024987	0.000182579	0.000304659	0.000820195	0	5.79422e-05	0	9.36946e-05	0.000828171	0.000245703	0.000292712	4.68473e-05	0.000353358	0.000333998	0.000720378	0.00105386	0	0	0	0
951	C12H11NO3H	218.081	3.33664e-06	4.66586e-06	5.65904e-06	5.16422e-06	1.86943e-06	2.91838e-06	3.93559e-06	1.4612e-06	4.32545e-06	1.43633e-06	0.000574022	0.000101687	0.000450938	0.000485803	0.000500122	0.000534722	0.00125458	0.000224385	9.65437e-05	4.56471e-05	0.000205422	0.000375549	0.000506882	0.000525171	0.000125534	0.000383284	0.000184303	0.000459027	0.000399186	8.7794e-06	1.60823e-05	1.24309e-05	5.16396e-06
952	C9H15NO5H	218.102	2.1663e-06	1.68411e-06	7.20946e-06	3.97184e-06	2.5259e-06	4.12498e-06	3.61376e-06	2.01597e-06	4.23337e-06	1.72556e-06	0.0021414	0.000412414	0.000107647	3.3801e-06	0	0	0.00319945	0.000271097	0.000187389	0	0	0.000887154	1.1267e-06	0.00121931	0	0.000526898	0.000622704	0.00111884	0.00134392	0	0	0	0
953	C13H15NO2H	218.118	3.4431e-06	1.71486e-06	9.94495e-06	3.9617e-06	2.69817e-06	5.11738e-06	4.48003e-06	2.9133e-06	4.97117e-06	2.59771e-06	0.00250494	0.000751723	9.89218e-05	0	0	0	0.00203019	0.000433809	0.000146955	0	0	0.00111853	0	0.000870318	0	0.000497212	0.000583004	0.00109522	0.00117378	0	0	0	0
954	C10H19NO4H	218.139	9.88905e-06	1.247e-05	1.73466e-05	1.43922e-05	2.06488e-06	7.64894e-06	1.06353e-05	5.39349e-06	1.17885e-05	5.24365e-06	0.000858414	0.000170007	1.81788e-05	0	0	0	0.000842214	0.000169247	7.15852e-05	0	0	0.000348866	0	0.000361016	0	0.000177471	0.000204985	0.000385337	0.000430178	0	0	0	0
955	C14H19NOH	218.154	2.10814e-05	2.79781e-05	2.71895e-05	3.2208e-05	4.20424e-06	1.52653e-05	2.13211e-05	1.02664e-05	2.37811e-05	1.04823e-05	0.0042761	0.00108507	7.78939e-06	0.00455002	0.000815893	0.000648529	0.00960507	0.000103406	2.40593e-05	0.00118407	0.000123655	0.00178965	0.00200481	0.00324418	0.000653864	0.00192313	0.00106155	0.00293655	0.00346548	2.93649e-05	2.58268e-05	2.75958e-05	2.50183e-06
956	C15H23NH	218.19	2.39173e-05	3.35946e-05	4.08991e-05	5.75309e-05	1.30655e-05	1.50944e-05	3.06837e-05	1.69281e-05	3.88424e-05	2.03352e-05	0.00794643	0.00359226	0.000176359	0.0124522	0.00294628	0.00143275	0.0218302	0.000577638	0.000255154	0.00510304	0.000415712	0.00390502	0.0056104	0.00755434	0.00275938	0.00495728	0.0020904	0.00677333	0.00744215	2.95124e-05	5.98736e-05	4.4693e-05	2.14686e-05
957	C12H10O4H	219.065	0.000427103	3.03514e-05	0.000142894	0.000739509	0.000401211	0.00151353	0.000542433	0.000536091	0.00065159	0.000456042	0.00194412	0.000341215	0	0	0	0	0.00149494	0	0	0	0	0.00076178	0	0.000498315	0	0.000315024	0.000379327	0.000743512	0.000935485	0	0	0	0
958	C13H14O3H	219.102	0.000182467	0.000111364	0.000303802	0.000165007	0.000132655	0.000240379	0.000189279	7.1609e-05	0.000196273	6.26803e-05	0.0198418	0.00554042	0.000424717	0	0	0	0.021598	0.000403333	0	0	0	0.00860233	0	0.00733377	0	0.00398402	0.00462941	0.00902335	0.0106564	0	0	0	0
959	C14H18O2H	219.138	0.000100277	0.000146486	0.000158074	0.000105918	9.4675e-06	3.62839e-05	9.27512e-05	5.91765e-05	9.18763e-05	5.0839e-05	0.0268401	0	0	0	0	0	0.0175953	0.000361317	0.000575176	0	0.00134795	0.00894669	0	0.00617727	0.000673975	0.00394949	0.00433061	0.00912864	0.0125963	0	8.33045e-05	4.16523e-05	5.89052e-05
960	C15H22OH	219.174	0.000302175	0.000358473	0.000282356	0.000456707	0.000231868	0.000289521	0.000320183	7.82299e-05	0.000353782	9.80851e-05	0.15356	0.0501019	0.00139584	0.166666	0.0331767	0.0219004	0.234576	0.00605051	0.00210695	0.0149795	0	0.0683525	0.0739145	0.080911	0.00748975	0.0576669	0.0338438	0.0885645	0.0919894	0	0.000256193	0.000128097	0.000181156
961	C16H26H	219.211	0.00368077	0.00281912	0.00273799	0.00522093	0.000923167	0.00129774	0.00277995	0.00157593	0.00332227	0.0018518	2.10876	0.839052	0.0407495	2.615	0.841061	0.330721	5.15065	0.0554482	0.0626879	0.889434	0.0744025	0.996189	1.26226	1.75626	0.481918	1.12416	0.5315	1.61308	1.7925	0.00279401	0.00586633	0.00433017	0.00217246
962	C8H13NO6H	220.082	1.01811e-05	1.48606e-05	1.17189e-05	5.49718e-06	4.37555e-06	1.50446e-05	1.02797e-05	4.54976e-06	8.54919e-06	4.46704e-06	0.00304584	0	8.43455e-06	0.000406647	0	3.35943e-05	0.00963669	0	0.000348758	0	0.000394313	0.00101809	0.000146747	0.00332848	0.000197156	0.00117262	0.00149171	0.0022739	0.00357586	3.0704e-06	5.56098e-06	4.31569e-06	1.76111e-06
963	C12H13NO3H	220.097	2.97597e-06	4.19969e-06	8.65662e-06	1.44003e-05	8.25999e-07	5.672e-06	6.12177e-06	4.83318e-06	9.05576e-06	5.93143e-06	0.00231627	0.000590703	0.000199503	0.000668698	0	3.99472e-05	0.00121625	0.00025905	7.2414e-05	0	5.85614e-05	0.00103549	0.000236215	0.000515905	2.92807e-05	0.000454224	0.000435807	0.000901777	0.000971454	0	6.82484e-06	3.41242e-06	4.82589e-06
964	C9H17NO5H	220.118	7.95592e-06	1.0248e-05	2.39325e-05	1.08457e-05	2.69077e-06	6.38987e-06	1.03438e-05	7.27761e-06	1.12833e-05	6.85649e-06	0.00265882	0.0012996	5.18894e-05	0	0	0	0.00258767	0.000138215	0.000151562	0	0	0.00133677	0	0.00095915	0	0.00057398	0.000680468	0.00127575	0.00135957	0	0	0	0
965	C13H17NO2H	220.133	7.41641e-05	0.000104206	1.42525e-05	5.22814e-06	1.43383e-06	2.48654e-06	3.36286e-05	4.43006e-05	1.24641e-05	3.15901e-05	0.000919244	0.000668957	0	0	0	0	0.0041404	0	0	0	0	0.0005294	0	0.00138013	0	0.000477384	0.000651525	0.000979456	0.00150256	0	3.24909e-06	1.62454e-06	2.29745e-06
966	C10H21NO4H	220.154	4.18388e-06	4.59466e-06	8.57259e-06	8.77709e-06	2.56071e-06	6.71823e-06	5.90119e-06	2.52546e-06	7.1335e-06	2.62118e-06	0.000601976	0.00016508	2.70776e-05	0	0	5.16376e-05	0.00183656	0	0.000115839	0.000210053	0.000359101	0.000264711	1.72125e-05	0.000650799	0.000284577	0.000304325	0.000261047	0.000503336	0.000645703	2.46884e-05	8.22946e-06	1.64589e-05	1.16382e-05
967	C14H21NOH	220.17	1.53979e-05	2.74539e-05	2.43081e-05	4.12834e-05	1.0036e-05	1.95756e-05	2.30092e-05	1.08941e-05	2.84606e-05	1.31416e-05	0.00617338	0.0013542	0.000255421	0.00897257	0.00239136	0.000980985	0.0160803	0.000417375	0.000538886	0.00433986	0.000533068	0.00259433	0.00411497	0.00567887	0.00243647	0.00370616	0.00151734	0.00491524	0.00554042	5.73372e-06	1.68221e-05	1.12779e-05	7.8407e-06
968	C15H25NH	220.206	6.40468e-05	9.79844e-05	7.79372e-05	0.000128027	2.56299e-05	2.40573e-05	6.96137e-05	4.08098e-05	8.33047e-05	4.6044e-05	0.00828125	0.00226213	0.000310671	0.0129192	0.00674664	0.00388508	0.0368649	0	0.00117971	0.0137676	0.00117686	0.00361801	0.00785031	0.0126816	0.00747224	0.00790553	0.00371412	0.00970102	0.0125508	8.07102e-05	9.48385e-05	8.77743e-05	9.9902e-06
969	C12H12O4H	221.081	0.000285885	6.69703e-05	0.000158037	0.000165753	0.00027972	0.000515236	0.000245267	0.000155847	0.000235041	0.00013063	0.00513614	0.000580669	0.000387934	0	0	0	0.00163637	0.00105835	0	0	0	0.00203491	0	0.00089824	0	0.000733288	0.00096555	0.00169963	0.00218236	0	0	0	0
970	C13H16O3H	221.117	5.89861e-05	0.000151969	0.000174444	8.42136e-05	4.70184e-05	5.95518e-05	9.60304e-05	5.38935e-05	9.41828e-05	4.46368e-05	0.010356	0.00032339	0.000907972	0	0	0.000360522	5.18951e-06	0.00188087	0.000153724	0	0	0.00386245	0.000120174	0.000679926	0	0.00116564	0.00182213	0.00275159	0.00449674	0	8.62907e-05	4.31453e-05	6.10167e-05
971	C17H16H	221.132	0.000174161	0.000350511	0.000295123	0.000139506	6.9816e-05	4.30063e-05	0.000178687	0.000122392	0.000154087	9.61591e-05	0.0198724	0.00661465	0.000613313	0.0098143	0	0.00309354	0.0323449	0.00136941	0.00265135	0.00245096	0.00114963	0.00903347	0.00430261	0.0121219	0.00180029	0.00681457	0.00463839	0.0117096	0.0124036	2.25655e-05	6.76128e-05	4.50891e-05	3.18532e-05
972	C14H20O2H	221.154	0.000200263	0.000191209	0.000316987	0.000357695	0.000127164	0.000187808	0.000230187	8.7883e-05	0.00027584	0.000101791	0.0556139	0.0128092	0.000356938	0.0150763	0	0.00249394	0.0331495	0.00524903	0.000971131	0.0255058	0	0.0229267	0.00585675	0.0131232	0.0127529	0.0136649	0.00702076	0.023095	0.0228756	0.000407275	0.000509262	0.000458269	7.21158e-05
973	C15H24OH	221.191	0.00017147	0.000488399	0.000389486	0.000693585	0.000295666	0.00038348	0.000403681	0.000177437	0.000501216	0.000198906	0.171744	0.0481978	0.00278061	0.152955	0.0396559	0.0206334	0.288805	0.0125264	0.00342224	0.0302495	0.00623833	0.0742409	0.0710815	0.101585	0.0182439	0.0662878	0.0348344	0.103061	0.108727	0.000186645	0.000413714	0.000300179	0.000160562
974	C16H28H	221.226	0.00106802	0.00157129	0.00193709	0.00329533	0.000670512	0.000585207	0.00152124	0.00101273	0.00206726	0.00127441	1.03713	0.460682	0.0395432	1.17217	0.545906	0.216668	2.70156	0.0421075	0.0520618	0.564344	0.0865234	0.512451	0.644915	0.931908	0.325434	0.603677	0.255067	0.8444	0.918442	0.00144613	0.00189103	0.00166858	0.00031459
975	C10H7NO5H	222.04	1.41083e-05	1.43334e-05	1.15733e-05	2.53528e-05	4.47196e-06	3.25234e-05	1.70605e-05	1.01252e-05	1.97695e-05	9.84863e-06	0.000391662	0	0.000163866	0.000195079	0	0	6.6378e-05	0	0	0	0	0.000185176	6.50263e-05	2.2126e-05	0	6.80821e-05	8.25983e-05	0.000118484	0.000166377	0	0	0	0
976	C11H11NO4H	222.076	1.54499e-05	1.35311e-05	2.73519e-05	2.9952e-05	1.19577e-05	4.3928e-05	2.36951e-05	1.24173e-05	2.76606e-05	1.05078e-05	0.00258136	0.000254854	0	0.000367247	0	0	0.00325076	0.000106203	0	0	0	0.000945404	0.000122416	0.00111899	0	0.000546702	0.000567267	0.00117418	0.00149327	0	0	0	0
977	C12H15NO3H	222.112	2.37278e-05	2.23688e-05	0.000102346	5.66858e-05	2.82166e-05	2.29145e-05	4.27099e-05	3.20244e-05	5.32578e-05	2.97444e-05	0.0115085	0.00283468	4.98755e-05	0.00236566	0	0.000233199	0.00790663	0.000794451	0.000166045	0	4.11132e-05	0.00479767	0.000866286	0.00295571	2.05566e-05	0.00216006	0.00214797	0.00457361	0.00519202	0	7.65688e-06	3.82844e-06	5.41423e-06
978	C13H19NO2H	222.149	0.000975729	0.00173036	0.00200016	0.00202422	0.0014445	0.00205141	0.0017044	0.000426465	0.00188958	0.000324315	0.00396047	0.00221803	0.00335582	0.00163613	0.00119375	0.00229734	0.00507364	0.00803211	0.00414654	0	0.00516288	0.00317811	0.00170907	0.00575076	0.00258144	0.00330485	0.00173862	0.00396522	0.00215148	0.00197674	0.00155628	0.00176651	0.00029731
979	C14H23NOH	222.185	0.000176775	0.000280566	0.0002584	0.000252055	0.000183476	0.000236175	0.000231241	4.21337e-05	0.000239243	2.96603e-05	0.00461122	0.00173532	0.000212663	0.00491762	0.00150294	0.000870685	0.00935157	0.00121913	0.0006944	0.00118767	0.000128521	0.0021864	0.00243041	0.00375503	0.000658097	0.00225749	0.0012696	0.00329739	0.00322617	0.000195315	0.000167287	0.000181301	1.98183e-05
980	C15H27NH	222.222	5.2273e-05	4.06095e-05	3.2485e-05	7.00948e-05	6.8233e-06	7.44999e-07	3.38384e-05	2.65595e-05	4.05598e-05	2.92103e-05	0.0114931	0.00525022	0.000507749	0.0180174	0.00703513	0.00278223	0.029245	0.00020141	0.000572215	0.00892186	0.000653721	0.00575035	0.00927825	0.0100062	0.00478779	0.00745565	0.00257247	0.00956529	0.00990265	3.95669e-06	1.71368e-05	1.05468e-05	9.31977e-06
981	C11H10O5H	223.06	0.000777285	0.000485129	0.00264636	0.00227861	0.00172978	0.00146289	0.00156334	0.00083699	0.00201228	0.000719829	0.0461364	0.0076513	0.00434078	0.0165679	0	0.000222912	0.00551086	0.03087	0.0117441	0	0.0113925	0.0193762	0.00559695	0.0160417	0.00569623	0.0116778	0.00709611	0.018707	0.0185643	0.00141221	0.00109621	0.00125421	0.000223442
982	C12H14O4H	223.096	0	0	3.44483e-05	0.000120322	0.000271809	0.000221638	0.000108036	0.000117164	0.000133954	9.00647e-05	0.0165252	0.0036678	0.000679616	0.000296625	0	0	0.00455432	0.00311355	0	0	0	0.00695752	9.88752e-05	0.00255596	0	0.00240309	0.00325835	0.00560331	0.00698047	0	3.16038e-05	1.58019e-05	2.23473e-05
983	C13H18O3H	223.133	0.000184812	0.000368209	0.000405517	0.000203785	9.04355e-06	0.00011794	0.000214884	0.000150097	0.000205795	0.000126794	0.0216086	0.00561828	0	0.00179915	0	0.00440196	0.0362414	0.00143027	0.00109963	0	0	0.00907562	0.00206704	0.0129238	0	0.00601661	0.00602399	0.0119799	0.0145673	0	3.5468e-05	1.7734e-05	2.50797e-05
984	C17H18H	223.148	0.000520399	0.000804128	0.00109179	0.000723624	3.19272e-05	0.000156153	0.00055467	0.000403118	0.000596928	0.000369899	0.0367144	0.0195882	0.000694016	0.0233129	0	0.0107195	0.118582	0.00608434	0.000321808	0	0.000179237	0.0189989	0.0113441	0.0416626	8.96187e-05	0.0180238	0.0175689	0.0320795	0.042135	0	0.000442735	0.000221367	0.000313061
985	C14H22O2H	223.169	0.000341092	0.00025579	0.000226735	0.000125823	1.255e-05	4.23265e-05	0.000167386	0.000128727	0.000127003	9.37242e-05	0.0853002	0.01253	0.000341082	0.0327868	0	0.00670667	0.10767	0.00311306	0.000325567	0.00210537	0	0.0327238	0.0131645	0.0370361	0.00105269	0.0209943	0.016871	0.0403284	0.0480386	0	0.00018968	9.48399e-05	0.000134124
986	C15H26OH	223.206	0.000140167	0.000148142	0.00010266	0.000220155	3.1481e-05	4.7291e-05	0.000114983	7.00021e-05	0.000136215	8.114e-05	0.226297	0.0589119	0.000476569	0.189182	0.0349614	0.0174025	0.383712	0.00776715	0.00149753	0.0377619	0.000475788	0.0952285	0.0805153	0.130992	0.0191188	0.0814637	0.0466559	0.132572	0.147381	5.06808e-05	0.000309978	0.00018033	0.000183351
987	C16H30H	223.242	0.000868846	0.00114708	0.00182771	0.00328781	0.000472086	0.000570858	0.0013624	0.0010614	0.00198523	0.00135852	0.642677	0.262357	0.0109641	0.650066	0.306953	0.0933282	1.47593	0.0277691	0.0228429	0.258723	0.0210231	0.305333	0.350116	0.508847	0.139873	0.326042	0.151751	0.475433	0.514036	0.00135406	0.00190016	0.00162711	0.000386149
988	C10H9NO5H	224.055	7.54689e-05	6.75983e-05	0.000279663	0.00022946	0.00017402	0.000114637	0.000156808	8.60473e-05	0.000200839	7.74806e-05	0.00588521	0.000610813	0.000382814	0.00205311	0	0	0.00289563	0.00247954	0.00123631	0	0.000753268	0.00229295	0.000684371	0.00220383	0.000376634	0.00138944	0.00100041	0.00241641	0.0023611	7.68709e-05	5.00262e-05	6.34486e-05	1.89821e-05
989	C11H13NO4H	224.092	6.80401e-05	0.000102944	0.000153918	0.000132246	4.54977e-05	6.00006e-05	9.37744e-05	4.31624e-05	0.000108576	4.33577e-05	0.00573793	0.000719646	0.000144328	0.00102319	0	0	0.0030485	0.000553844	0.000365905	0	0	0.00220064	0.000341064	0.00132275	0	0.000966112	0.000995874	0.00205355	0.0024889	0	8.56538e-06	4.28269e-06	6.05664e-06
990	C12H17NO3H	224.128	5.90875e-05	0.000124611	0.000143885	7.86784e-05	2.6218e-05	5.18421e-05	8.07203e-05	4.51504e-05	8.03608e-05	3.81096e-05	0.00860885	0.00189318	0.000614208	0.00358337	0.000170617	0.0003825	0.00681686	0.000318611	0.000125949	0	0.000219293	0.00370541	0.00137883	0.00242047	0.000109647	0.00190359	0.00152833	0.00360274	0.00391866	3.99761e-05	3.38757e-05	3.69259e-05	4.31366e-06
991	C13H21NO2H	224.165	0.000185792	0.000177872	0.000143764	0.000111087	4.89349e-05	7.58108e-05	0.000123877	5.51991e-05	0.000107522	4.01986e-05	0.00335196	0.000538852	0.000163691	0.00334486	0	0.0008008	0.00821028	0.000582902	0	0.00399994	0	0.0013515	0.00138189	0.00293106	0.00199997	0.0019161	0.000739671	0.00259995	0.00288769	3.85585e-05	2.77861e-05	3.31723e-05	7.61728e-06
992	C14H25NOH	224.201	0.000236586	0.000114823	2.72152e-05	4.32605e-05	1.4649e-05	1.28824e-05	7.49028e-05	8.77355e-05	4.0102e-05	5.35821e-05	0.00312912	0.000902572	0.000105283	0.00312803	0.000399373	7.53388e-05	0.00724826	0	8.60897e-06	0.00572013	0.000114129	0.00137899	0.00120091	0.00241896	0.00291713	0.001979	0.000824434	0.00250382	0.00265802	0	4.8219e-06	2.41095e-06	3.4096e-06
993	C15H29NH	224.237	8.77079e-05	5.63637e-05	6.92476e-05	0.000164674	1.56037e-05	2.42959e-05	6.96488e-05	5.38708e-05	9.45448e-05	6.80034e-05	0.00625676	0.0017534	0.000291799	0.00779002	0.00284718	0.00124072	0.0175435	0.00012172	0.000418179	0.00451767	0.000290928	0.00276732	0.00395931	0.00602779	0.0024043	0.00378968	0.00163324	0.00516941	0.00602686	1.31105e-05	3.10745e-05	2.20925e-05	1.27025e-05
994	C10H8O6H	225.039	0.00070029	0.0011834	0.00176912	0.00153089	0.00150116	0.000917629	0.00126708	0.000406646	0.00143649	0.000339122	0.0186845	0.00360051	0.00284181	0.0112969	0	0.00324191	0.0113138	0.0118905	0.00819979	0.000170912	0.00866276	0.00837561	0.00484628	0.010468	0.00441684	0.00702668	0.00289987	0.00972071	0.00674403	0.00132203	0.00136818	0.00134511	3.26289e-05
995	C11H12O5H	225.076	0.000141713	0.000247021	0.000459506	0.000433202	0.000381391	0.000254909	0.000319624	0.000124413	0.000385552	0.000107903	0.0035006	0.000200729	0.00102658	0.00161003	0	0.000444284	0.00370058	0.00136995	0.00201903	0	0.00174512	0.00157597	0.000684771	0.00236318	0.000872559	0.00137412	0.000762836	0.00193594	0.0015324	0.000305906	0.000288957	0.000297432	1.19852e-05
996	C12H16O4H	225.112	3.63065e-05	7.56746e-05	0.000112364	6.78548e-05	2.97211e-05	2.43195e-05	5.77067e-05	3.39678e-05	6.31436e-05	3.05916e-05	0.00930753	0.000222798	0	0.000124171	0	0.00188591	0.0172846	0	0.000948874	0	0.0010064	0.00317678	0.000670026	0.00607782	0.0005032	0.00260696	0.00261719	0.00504105	0.00689827	0	5.41744e-05	2.70872e-05	3.83071e-05
997	C13H20O3H	225.149	0.000620539	0.00117358	0.00117646	0.000726263	9.35977e-05	0.000361665	0.000692018	0.000433615	0.000675131	0.000357911	0.0439591	0.00616971	0.000480324	0.020317	0	0.00698773	0.097437	0.00418247	0.00195962	0	0	0.0168697	0.00910156	0.0345264	0	0.0151244	0.0146572	0.0277949	0.0366862	0.000105367	0.000503808	0.000304587	0.000281741
998	C17H20H	225.164	0.00616754	0.0119056	0.00390414	0.00113434	0.000161462	0.000456222	0.00395489	0.00453208	0.002044	0.00323844	0.11133	0.0583604	0.000648721	0.126844	0.0198927	0.0300337	0.355421	0.00895971	0.000563485	0.0115567	0	0.0567797	0.0589235	0.121648	0.00577833	0.0607824	0.0474326	0.0978846	0.124791	2.90526e-05	0.00104868	0.000538864	0.000720983
999	C14H24O2H	225.185	0.000271311	0.000604218	0.000623281	0.000215491	5.36117e-05	0.000147012	0.000319154	0.000239556	0.000276956	0.000203547	0.102078	0.00529454	0	0.0513643	0	0.00741738	0.158211	0.0015718	0.00117686	0.00938407	0	0.035791	0.0195939	0.0536533	0.00469203	0.0284325	0.021071	0.0517066	0.0655005	0	0.000318275	0.000159137	0.000225054
1000	C15H28OH	225.221	0.000344801	0.000240034	0.000222031	0.000556369	8.25241e-05	9.72352e-05	0.000257166	0.000175959	0.000327783	0.000217234	0.263771	0.0685618	0.00121359	0.233819	0.0533615	0.0232567	0.443934	0.00552026	0.00283105	0.043853	0.00242156	0.111182	0.103479	0.150762	0.0231373	0.0971401	0.0535072	0.154465	0.170265	0.000194817	0.000440902	0.00031786	0.000174008
1001	C16H32H	225.258	0.00645306	0.00449104	0.00356474	0.0115298	0.000642996	0.00129539	0.00466284	0.0039773	0.00627621	0.0049616	0.919901	0.366562	0.0122318	0.995311	0.503261	0.119502	2.67198	0.0208132	0.0313025	0.472918	0.0173818	0.432898	0.539358	0.908032	0.24515	0.53136	0.27902	0.773066	0.921297	0.0014038	0.00252799	0.0019659	0.00079492
1002	C9H7NO6H	226.035	5.63822e-05	5.99671e-05	0.000174863	0.000111905	0.000128802	6.14721e-05	9.88985e-05	4.80791e-05	0.000114746	4.06335e-05	0.000565484	0.000162557	9.35289e-05	0.00126278	0	0.000386061	0.00673607	0	0.000541969	0	0.00018194	0.000273857	0.000549613	0.00242601	9.09699e-05	0.000835113	0.00107722	0.00130222	0.0024059	0.000103245	9.42047e-05	9.87247e-05	6.39225e-06
1003	C10H11NO5H	226.071	1.74227e-05	1.70582e-05	6.43987e-05	6.50822e-05	5.02026e-05	3.01872e-05	4.07253e-05	2.21707e-05	5.36706e-05	2.07776e-05	0.00186973	0.000251874	0.000106118	0.000428357	0	0	0.00157429	0.000158172	0.000475393	0	0.000718715	0.000742575	0.000142786	0.000735953	0.000359358	0.000495168	0.000295413	0.0008359	0.000825556	2.92302e-05	3.3522e-05	3.13761e-05	3.03474e-06
1004	C11H15NO4H	226.107	5.68719e-06	4.52161e-06	1.29723e-05	1.13941e-06	7.08724e-06	8.41468e-06	6.63708e-06	3.97744e-06	5.7311e-06	4.61077e-06	0.00247488	0.000196678	0.000342148	0.000612729	0.000104747	0.000388558	0.00587201	0	0	0	0	0.00100457	0.000368678	0.00195734	0	0.000832646	0.000856943	0.0015763	0.00221905	2.74622e-06	9.15408e-07	1.83082e-06	1.29458e-06
1005	C12H19NO3H	226.144	4.15933e-05	7.13408e-05	8.59569e-05	3.09636e-05	9.97997e-06	2.7599e-05	4.45723e-05	2.86637e-05	3.98414e-05	2.58405e-05	0.00408587	0.000223096	0	0.00321245	0	0.000693067	0.0108701	0.000238187	1.47352e-05	0	0	0.00143632	0.00130184	0.00370766	0	0.00161145	0.00154028	0.00281474	0.00403002	0	1.04786e-05	5.2393e-06	7.40949e-06
1006	C13H23NO2H	226.18	3.22975e-05	6.15046e-05	6.79593e-05	3.50566e-05	7.30603e-06	1.88971e-05	3.71702e-05	2.36394e-05	3.56643e-05	1.99925e-05	0.00419831	0.00043704	4.25065e-06	0.00406608	0	0.000458263	0.0105277	7.84826e-05	0	0.000549361	0	0.00154653	0.00150811	0.00353538	0.00027468	0.00171618	0.00134901	0.00286247	0.00388728	3.2736e-05	2.93257e-05	3.10309e-05	2.41144e-06
1007	C14H27NOH	226.217	2.76237e-05	2.59332e-05	2.96581e-05	5.80303e-05	7.37228e-06	1.07219e-05	2.65566e-05	1.80029e-05	3.51188e-05	2.27704e-05	0.00396183	0.000389438	0	0.00421279	0.0010271	0.000504315	0.00933323	0	0.000115407	0.00133229	0	0.00145042	0.00191473	0.00314955	0.000666144	0.00179521	0.00103958	0.00268611	0.00339786	0	3.28083e-06	1.64042e-06	2.3199e-06
1008	C15H31NH	226.253	4.2761e-05	4.32153e-05	5.64363e-05	0.000156433	1.01569e-05	1.5235e-05	5.40396e-05	5.32279e-05	8.4414e-05	7.0684e-05	0.00325361	0.00104664	0.000254491	0.00407472	0.00188248	0.000649286	0.0125818	0	0.000516719	0.00510507	0.000925338	0.00151825	0.00220216	0.00436618	0.0030152	0.00277545	0.00122435	0.00351271	0.00424425	3.27376e-05	4.16788e-05	3.72082e-05	6.32241e-06
1009	C10H10O6H	227.055	0.000126218	0.000152077	0.000134541	5.84566e-05	0.000117449	4.60649e-05	0.000105801	4.31969e-05	8.64342e-05	4.23266e-05	0.00634744	0.00183018	0.00036888	0.00134727	0	0.00123483	0	0.0014642	0.00160722	0.000756035	0.00121365	0.00284883	0.000860701	0.00102381	0.000984844	0.00142955	0.000948744	0.00225137	0.00246962	0.000100619	0.000206934	0.000153777	7.51763e-05
1010	C11H14O5H	227.091	0.00014802	0.000199829	0.0001172	6.85412e-05	5.16468e-05	2.46491e-05	0.000101648	6.56609e-05	7.67358e-05	4.80891e-05	0.00724554	0.000322317	0.000977283	0.000753189	0.000700125	0.00332187	0.00237668	0	0.00091979	0.000104297	0.00102764	0.00284838	0.00159173	0.00109882	0.000565969	0.00152622	0.000975901	0.00236667	0.00290703	0	5.23015e-05	2.61507e-05	3.69827e-05
1011	C12H18O4H	227.128	0.000137587	0.000171312	1.44136e-05	0.000111788	1.43435e-05	3.54522e-05	8.08162e-05	6.82021e-05	6.97932e-05	5.21125e-05	0.00795145	0.00037876	0.000184095	0	0	0.00050637	0.00326721	0.000715601	0.00233023	0	0	0.0028381	0.00016879	0.00210435	0	0.00127781	0.0014119	0.00263587	0.00339705	0	0	0	0
1012	C13H22O3H	227.164	0.000175638	0.000186893	8.52113e-05	0.000236573	9.46596e-05	0.00016683	0.000157634	5.78048e-05	0.000170898	6.57582e-05	0.065016	0.0183869	0.00120689	0.0447761	0	0.0113155	0.144435	0.0123844	0.0115751	0	0	0.0282033	0.0186972	0.0561315	0	0.025758	0.0233942	0.0444101	0.05262	0.000355889	0.000580511	0.0004682	0.000158831
1013	C17H22H	227.179	0.000143323	0.000166978	0.000271878	0.000213756	6.9998e-05	0.00012295	0.000164814	7.08056e-05	0.000184399	6.98656e-05	0.0929484	0.0457468	0.00040392	0.0916893	0.0073136	0.0186849	0.366136	0.00274687	0.000254181	0.0164279	0	0.0463664	0.0392293	0.123046	0.00821397	0.0542139	0.0487851	0.0912939	0.129257	0.00059462	0.00105257	0.000823595	0.00032382
1014	C14H26O2H	227.201	0.000149774	0.000181359	0.000254782	0.000342834	9.65522e-05	0.000209896	0.000205866	8.5867e-05	0.000254369	0.000101982	0.151252	0.0372428	0.000352974	0.104263	0.0114551	0.0172765	0.265257	0.00611591	0.00047003	0.0286825	0	0.0629493	0.0443314	0.0906143	0.0143412	0.0530591	0.0320596	0.0890707	0.101515	0.00034889	0.000887675	0.000618282	0.000380979
1015	C15H30OH	227.237	0.000936381	0.00182682	0.000206586	0.000211398	0.000364118	0.000305642	0.000641825	0.000641221	0.000343079	0.000458355	0.277689	0.0866993	0.00122437	0.199329	0.0314369	0.0196722	0.461096	0.0109524	0.00337358	0.0391391	0	0.121871	0.0834794	0.158474	0.0195696	0.0958485	0.0593594	0.162267	0.17844	0.000679995	0.00103536	0.000857676	0.000251279
1016	C16H34H	227.273	1.41367e-05	1.94465e-05	7.26495e-06	4.12803e-06	1.6344e-05	1.27187e-05	1.23398e-05	5.71135e-06	8.93139e-06	6.20056e-06	0.0028936	0.000485162	0	0.00876239	0.00117996	0.000991306	0.0128649	0	0.000228375	0.000723386	0	0.00112625	0.00364455	0.00436444	0.000361693	0.00237423	0.00193067	0.00311179	0.00458765	3.15748e-05	2.18731e-05	2.67239e-05	6.86017e-06
1017	C8H5NO7H	228.014	4.12285e-05	5.57206e-05	3.4495e-05	1.21856e-05	3.09768e-05	1.11811e-05	3.09646e-05	1.71738e-05	2.20251e-05	1.56034e-05	0.000244199	2.02371e-05	1.42397e-05	0.000424033	0.000115372	0.000196765	0.00737677	0	8.86954e-05	0	0	9.2892e-05	0.00024539	0.00248849	0	0.000706693	0.00119216	0.00123978	0.00270379	3.58254e-05	3.18456e-05	3.38355e-05	2.81417e-06
1018	C9H9NO6H	228.05	2.42988e-05	3.02098e-05	3.29925e-05	1.86817e-05	1.70764e-05	7.347e-06	2.17677e-05	9.41445e-06	2.01031e-05	8.18788e-06	0.000295133	4.07337e-05	0	0.000376919	0	7.30291e-05	0.00161204	0	0.000223881	0.000229094	0.000237095	0.000111956	0.000149983	0.000611974	0.000233095	0.000276752	0.000229135	0.000382287	0.000554325	1.33041e-05	1.37651e-05	1.35346e-05	3.25967e-07
1019	C10H13NO5H	228.087	1.74094e-05	1.27788e-05	1.9526e-05	8.32906e-06	8.35238e-06	1.46083e-05	1.35007e-05	4.61695e-06	1.19141e-05	4.80284e-06	0.00136851	0	8.59385e-05	0.000543636	7.89866e-05	0.000232559	0.00289466	0	0.0003575	0	0	0.000484815	0.00028506	0.00108405	0	0.000463482	0.000459062	0.000813873	0.0011065	0	0	0	0
1020	C11H17NO4H	228.123	4.75857e-05	7.2835e-05	0.00012707	0.00018861	0.000122386	0.000176513	0.0001225	5.54753e-05	0.000155314	5.09074e-05	0.001959	0.000115704	0.000537235	0.000352434	0.000697214	0.000519503	0.00492997	0	0.000859042	0.000487798	0.00113711	0.000870645	0.000523051	0.00192967	0.000812453	0.00103395	0.000616188	0.00147068	0.00170685	7.1969e-05	4.46872e-05	5.83281e-05	1.92912e-05
1021	C12H21NO3H	228.159	0.00135143	0.00204601	0.000704935	0.000270324	4.66678e-05	0.000112979	0.00075539	0.000796714	0.000406809	0.000572243	0.00439191	0.0010584	0.000138593	0.006847	0.000879648	0.0019153	0.0172113	0	0.000360835	0.000987811	0.000697028	0.00186297	0.00321399	0.00585738	0.00084242	0.00294419	0.00217148	0.00427153	0.00601196	9.24945e-05	8.36499e-05	8.80722e-05	6.25407e-06
1022	C13H25NO2H	228.196	0.000870891	0.00134327	0.000354945	0.000113336	1.58357e-05	5.32538e-05	0.000458589	0.000537202	0.00021321	0.000385619	0.0070794	0.00102783	4.60298e-05	0.00898519	0.000194701	0.000883467	0.0190574	0.000104285	9.29495e-06	0.00147828	0	0.00271775	0.00335445	0.00639031	0.000739139	0.00330041	0.00234165	0.0051834	0.00691893	2.23192e-07	3.33734e-05	1.67983e-05	2.34408e-05
1023	C14H29NOH	228.232	0.000111627	9.69552e-05	1.71792e-05	0.000132065	8.12308e-06	8.09229e-06	6.23402e-05	5.729e-05	6.96257e-05	5.90871e-05	0.00367652	0.000356317	0	0.0049629	0.000920834	0.000537713	0.0143928	0	0.000198695	0.00173384	0	0.00134428	0.00214048	0.00486384	0.000866918	0.00230388	0.00178566	0.003458	0.00509413	4.14794e-05	4.83229e-05	4.49011e-05	4.83911e-06
1024	C13H8O4H	229.05	5.78925e-06	3.80366e-05	1.03427e-05	7.16122e-06	0.000111713	3.97036e-05	3.54578e-05	4.03764e-05	3.02982e-05	3.72648e-05	0.00232452	3.60847e-05	9.16527e-06	0	0	0.000529363	0.00169196	0.000518594	0.000454162	0	0	0.000789923	0.000176454	0.000888238	0	0.000463654	0.000441279	0.000898779	0.0010603	2.34075e-05	4.67075e-05	3.50575e-05	1.64755e-05
1025	C14H12O3H	229.086	9.87559e-06	7.58782e-06	2.91099e-05	2.24905e-05	2.08445e-05	4.8875e-05	2.31306e-05	1.49762e-05	2.65278e-05	1.12406e-05	0.00162968	2.12668e-05	0.000319571	0.000114536	0.0004665	0.000530447	0	2.2922e-05	0.000496288	0	0.000859718	0.000656839	0.000370494	0.00017307	0.000429859	0.000407565	0.000199162	0.000509792	0.00066596	7.3065e-07	2.4355e-07	4.871e-07	3.44432e-07
1026	C15H16O2H	229.122	5.37316e-05	4.34077e-05	7.27063e-05	2.31463e-05	5.6763e-05	6.45733e-05	5.2388e-05	1.7424e-05	4.60358e-05	2.17219e-05	0.00575265	0.000988647	0.000266214	0	0	0.000911616	0.00135094	0.00226234	0.000621429	0	0	0.00233584	0.000303872	0.00141157	0	0.00101282	0.00107048	0.00204217	0.00237324	1.13269e-05	3.77563e-06	7.55126e-06	5.33955e-06
1027	C16H20OH	229.159	0.000102388	3.06015e-06	0	0.00023151	0.000124933	0.000560596	0.000170415	0.000209628	0.000207515	0.000179926	0.0313529	0.00984537	0.000755976	0	0	0	0.0366898	0.00862525	0.00599462	0	0.00341661	0.0139847	0	0.0171032	0.0017083	0.00819907	0.00860451	0.016347	0.0163112	0.00015643	0.000256624	0.000206527	7.08483e-05
1028	C17H24H	229.195	0.00052741	0.000773133	0.00143117	0.000664114	0.000291942	0.000533954	0.000703621	0.000391163	0.000733817	0.000365441	0.473793	0.191033	0.00316254	0.464017	0.0419988	0.0881373	1.43764	0.0199791	0.00516255	0.107734	0	0.222663	0.198051	0.487593	0.0538671	0.240544	0.180746	0.393168	0.508315	0.00374672	0.00562902	0.00468787	0.00133099
1029	C14H29O2	229.216	4.77567e-05	0.000187281	0.000149983	0.000259742	2.77162e-05	8.65796e-05	0.00012651	8.89399e-05	0.000166556	9.87718e-05	0.0195887	0.0102684	0	0.0379773	0.0012512	0.0061886	0.0364956	0.00122367	0	0	0	0.00995234	0.015139	0.0125731	0	0.00941612	0.00662493	0.013344	0.0139467	0.000262684	0.000217637	0.00024016	3.18535e-05
1030	C15H32OH	229.253	0	1.89643e-06	1.34473e-05	2.7582e-05	3.1174e-06	4.81059e-06	8.47562e-06	1.04598e-05	1.5601e-05	1.30569e-05	0	0.000123411	0.000241348	0.00714921	0.000417292	0.00111914	0	0	0	0	0	0.000121586	0.00289521	0	0	0.0007542	0.00142849	0.000258887	0.0012773	0	0	0	0
1031	C8H7NO7H	230.03	1.23961e-05	1.85853e-05	1.50398e-05	2.56359e-05	3.30706e-05	2.44563e-05	2.15307e-05	7.65281e-06	2.3864e-05	6.32457e-06	0.000835149	0	8.36411e-05	0.000160545	0	0	0.000834513	0.000135652	4.93623e-05	0	0	0.000306263	5.35148e-05	0.000339842	0	0.000174905	0.000173	0.000353233	0.000425477	0	0	0	0
1032	C9H11NO6H	230.066	2.57091e-06	1.35245e-06	1.09537e-06	2.69925e-06	1.37084e-06	4.79729e-06	2.31435e-06	1.39143e-06	2.44736e-06	1.21672e-06	0.00122375	9.28596e-05	0.000145007	3.58311e-05	0	0	0	1.94286e-05	0.000226168	0	0	0.000487205	1.19437e-05	8.18654e-05	0	0.000145253	0.000230809	0.00032429	0.000527759	0	0	0	0
1033	C10H15NO5H	230.102	6.68944e-06	8.0036e-06	2.49894e-05	1.56593e-05	9.22008e-06	3.27265e-05	1.62147e-05	1.05548e-05	1.84698e-05	8.38299e-06	0.00248	0.00117672	0.0003696	0.000363502	0	0.000273944	0.00676661	0.000228892	0.000453214	0	0.000372739	0.00134211	0.000212482	0.00248291	0.00018637	0.00105597	0.00109327	0.00195715	0.00242364	0	0	0	0
1034	C11H19NO4H	230.139	2.02704e-05	2.62005e-05	2.94293e-05	1.64448e-05	1.88525e-05	3.12267e-05	2.37374e-05	6.05999e-06	2.21344e-05	6.46345e-06	0.00186895	0.000878655	0.000538445	0.000825262	0.000470018	0.00069011	0.00510138	0.000183861	0.000391084	0.000345868	0.000923254	0.00109535	0.000661797	0.00189211	0.000634561	0.00107095	0.000586725	0.00159446	0.00169951	4.40998e-05	2.20419e-05	3.30709e-05	1.55973e-05
1035	C12H23NO3H	230.175	0.000107388	5.57837e-05	5.76049e-05	6.94519e-06	2.92572e-05	3.36318e-05	4.84352e-05	3.44148e-05	2.94025e-05	3.07415e-05	0.00933946	0.00419217	2.63487e-05	0.0178972	0.00154246	0.0038408	0.0283817	0.00261041	0	0	0	0.00451933	0.00776014	0.0103307	0	0.00565254	0.0044558	0.00822918	0.00992853	0	3.85335e-05	1.92667e-05	2.72473e-05
1036	C13H27NO2H	230.211	3.71239e-05	2.93666e-05	3.96158e-05	1.25015e-05	1.30767e-05	8.63403e-06	2.33864e-05	1.36402e-05	1.86693e-05	1.2569e-05	0.00926124	0.00281454	2.61896e-05	0.0129012	0.00167868	0.00167526	0.0206691	0.000412918	0	0.00238422	0	0.00403399	0.00541837	0.00702735	0.00119211	0.00441795	0.00247408	0.00649623	0.00745166	1.29413e-05	4.79825e-05	3.04619e-05	2.47779e-05
1037	C13H10O4H	231.065	0.000143427	0.000251827	4.20531e-06	3.21773e-05	4.23057e-05	1.76497e-05	8.19321e-05	9.68146e-05	3.93767e-05	6.70775e-05	0.000907323	4.16063e-05	0	0	0	0.000515454	0.00561878	0	0.00236699	0	0	0.00031631	0.000171818	0.00266193	0	0.000787513	0.00125628	0.00122201	0.00203103	4.57696e-05	9.02989e-05	6.80342e-05	3.1487e-05
1038	C14H14O3H	231.102	1.14831e-05	2.09469e-05	3.3369e-05	3.09183e-05	0	9.09705e-06	1.76357e-05	1.30898e-05	2.22064e-05	1.35354e-05	0.00521325	0.000407569	9.985e-05	0	0	0	0.00171773	0	0.00014864	0	0	0.00190689	0	0.000622122	0	0.000632253	0.000898942	0.00156009	0.00228019	0	0	0	0
1039	C15H18O2H	231.138	6.03108e-05	1.58651e-05	9.62022e-05	0	3.39787e-05	3.75881e-05	4.06575e-05	3.40388e-05	3.1955e-05	3.65979e-05	0.00486876	0	6.91711e-05	0	0	0	0.000615224	0.000134996	0.000463474	0	0.00111489	0.00164598	0	0.000404565	0.000557447	0.000651997	0.00070315	0.00134367	0.00207569	9.10785e-05	6.15839e-05	7.63312e-05	2.08558e-05
1040	C16H22OH	231.174	0.00087522	0.000325329	0.00243318	0.00229807	0.00222897	0.00436749	0.00208804	0.00141117	0.00250147	0.00101552	0.0904407	0.0331339	0.0084385	0.054637	0.00617121	0.0106616	0.148846	0.0436333	0	0	0	0.0440044	0.0238233	0.0641599	0	0.0329969	0.0274788	0.0576375	0.0562345	0	0	0	0
1041	C17H26H	231.211	0.000861924	0.00126878	0.00313837	0.00238107	0.00107884	0.00232045	0.00184157	0.000902401	0.00221953	0.000783436	0.895589	0.313244	0.00791492	0.856217	0.135699	0.143066	2.26896	0.0289168	0.00723488	0.192729	0.000777206	0.405583	0.378327	0.76837	0.0967529	0.412258	0.275412	0.663142	0.810886	0.00180201	0.00453137	0.00316669	0.00192995
1042	C7H5NO8H	232.009	2.84052e-05	9.9157e-05	1.1308e-05	2.29725e-05	1.06641e-05	3.43685e-06	2.93239e-05	3.53857e-05	1.9416e-05	2.13529e-05	0.000836579	0.00014746	0.000741312	0.000296344	0.000693598	0.000485309	0.00945293	0	0.000322115	0.000481567	0.00094478	0.000575117	0.00049175	0.00325835	0.000713173	0.0012596	0.00133563	0.00189949	0.00333686	1.36286e-06	2.10318e-05	1.11973e-05	1.3908e-05
1043	C8H9NO7H	232.045	3.46566e-06	4.67003e-06	7.28388e-06	3.95887e-06	6.008e-06	3.63889e-06	4.83756e-06	1.51483e-06	4.87831e-06	1.40091e-06	0.000618987	6.2562e-05	0	0	0	0	0.000701885	0	3.8614e-05	0	0	0.000227183	0	0.000246833	0	0.000118504	0.000137072	0.000266061	0.000342922	4.03988e-06	1.34663e-06	2.69325e-06	1.90442e-06
1044	C9H13NO6H	232.082	2.66792e-05	4.97994e-05	1.06662e-05	1.4045e-05	1.82692e-06	8.69835e-06	1.86192e-05	1.73306e-05	1.26739e-05	1.12001e-05	0.000572754	0	0	0.000242214	0	0	0.00161793	0	5.59921e-05	0	0	0.000190918	8.07381e-05	0.000557976	0	0.000207408	0.000246464	0.000395904	0.000606094	0	6.93238e-06	3.46619e-06	4.90193e-06
1045	C13H13NO3H	232.097	5.30838e-06	8.82673e-06	9.34444e-06	1.0298e-05	2.07652e-06	6.0041e-06	6.97636e-06	3.09194e-06	7.96633e-06	3.13895e-06	0.000489396	0.000194717	0.000206345	0.000158108	0	0.000205922	0.00179696	8.8451e-05	7.22865e-05	0	0	0.000296819	0.000121343	0.000652565	0	0.000267682	0.00028405	0.000464938	0.000630152	0	0	0	0
1046	C10H17NO5H	232.118	2.63706e-06	3.07398e-06	5.64586e-06	3.72968e-06	7.54889e-07	3.18683e-06	3.17138e-06	1.58552e-06	3.48991e-06	1.48768e-06	0.00103241	0.000265055	0.000241529	0	0	0	0.00327689	0	9.72573e-05	0	0.000150024	0.000512999	0	0.00112471	7.50119e-05	0.000428182	0.000516534	0.000832581	0.00119209	0	0	0	0
1047	C14H17NO2H	232.133	9.84362e-07	2.23135e-06	4.44504e-06	3.6848e-06	1.24624e-06	1.02065e-06	2.26874e-06	1.48296e-06	2.89522e-06	1.48614e-06	0.00124806	6.67148e-05	1.30024e-05	7.1971e-05	0	0	0.00131634	0	0	0	0	0.000442591	2.39903e-05	0.00043878	0	0.000226341	0.000247703	0.000509619	0.000673298	0	1.11402e-05	5.57009e-06	7.8773e-06
1048	C11H21NO4H	232.154	2.88201e-06	9.63788e-07	1.9426e-08	1.40604e-07	1.94912e-06	3.83683e-07	1.05644e-06	1.14061e-06	5.53716e-07	9.24814e-07	0.000587646	0.000161924	0.00031045	0.000104925	0.000170072	0.000203163	0.00146283	0	5.05861e-05	0	0	0.00035334	0.000159387	0.000504473	0	0.0002543	0.00022066	0.000427758	0.000525364	3.09903e-05	1.78207e-05	2.44055e-05	9.31233e-06
1049	C15H21NOH	232.17	1.88621e-05	1.3807e-05	1.63103e-05	1.8774e-06	1.02184e-05	6.71528e-06	1.12984e-05	6.3174e-06	7.71659e-06	6.92413e-06	0.000802536	0.000221753	6.50927e-05	0.00085186	0.000509111	0.000409216	0.00320669	0.000440371	0.000201379	0	0	0.000363127	0.000590062	0.00128281	0	0.000559001	0.000540284	0.000833669	0.00109781	4.09719e-05	4.49083e-05	4.29401e-05	2.78342e-06
1050	C16H25NH	232.206	0.000192284	0.000182669	0.000161287	5.13107e-05	0.000176824	0.000201259	0.000160939	5.54098e-05	0.000125015	7.38153e-05	0.00980165	0.00324892	0.000778047	0.0178533	0.00352588	0.00347605	0.0329452	0.00478907	0.00360008	0.0076071	0.00132258	0.00460954	0.00828509	0.0137781	0.00446484	0.0077844	0.00436938	0.0100084	0.0107627	0.000607844	0.000558811	0.000583327	3.4671e-05
1051	C13H12O4H	233.081	0.000148094	0.000212675	9.3588e-05	0.00122536	0.000203195	0.000763805	0.00044112	0.000454885	0.00070207	0.000560551	0.00122342	0	0.000331005	0	0	0	0	0	0.0100595	0	0	0.000518141	0	0.00335317	0	0.000967827	0.00160888	0.000810079	0.00218682	0	4.22819e-05	2.1141e-05	2.98978e-05
1052	C14H16O3H	233.117	4.39609e-05	3.75831e-05	6.99873e-05	0.000204526	1.94364e-05	0.000125114	8.34345e-05	6.97673e-05	0.000125634	8.5492e-05	0.00663024	0.00164721	0	0	0	0	0.00797193	0.000130367	0.00217972	0	0.00362961	0.00275915	0	0.00342734	0.0018148	0.00200032	0.00148861	0.00345001	0.00345948	0	4.84584e-06	2.42292e-06	3.42653e-06
1053	C15H20O2H	233.154	0.00027674	0.000188631	0.000293981	0.000176039	0.000248116	0.000469618	0.000275521	0.000106032	0.000258648	0.000102702	0.0112345	0.000701707	0.000543114	0	0	0	0.00827366	0.0076056	0.00168427	0	0	0.00415979	0	0.00585451	0	0.00250358	0.00297252	0.00504641	0.00529491	0.000242237	0.000120796	0.000181516	8.5872e-05
1054	C16H24OH	233.19	0.00124034	0.00102485	0.00194018	0.000996292	0.00178477	0.00267	0.0016094	0.000650975	0.00156559	0.000615356	0.123347	0.0475531	0.00634741	0.10997	0.0202634	0.0184193	0.213616	0.0423622	0.0140001	0	0.00204695	0.0590824	0.0495511	0.0899926	0.00102347	0.0499124	0.0368817	0.0803974	0.0782134	0.00218237	0.00145307	0.00181772	0.000515694
1055	C17H28H	233.226	0.00224331	0.00187096	0.0026831	0.0026223	0.000619481	0.000773528	0.00180211	0.000906073	0.00199366	0.000905395	1.37397	0.547393	0.0136829	1.40911	0.344442	0.203129	3.23316	0.0341845	0.0285014	0.381994	0.0251587	0.645017	0.652227	1.09862	0.203577	0.649859	0.365413	1.00275	1.14762	0.00371662	0.00722014	0.00546838	0.00247736
1056	C7H7NO8H	234.024	4.20787e-05	7.54257e-05	1.70035e-05	1.5841e-05	3.18814e-06	1.7371e-06	2.5879e-05	2.8265e-05	1.53975e-05	1.85959e-05	0.000249728	0	3.0303e-05	0.000292784	7.30119e-05	8.08335e-05	0.0106437	0	0	1.37123e-05	0	9.33436e-05	0.000148877	0.0035479	6.85615e-06	0.000949245	0.00173342	0.00174241	0.00392383	1.30632e-05	1.17349e-05	1.23991e-05	9.39276e-07
1057	C8H11NO7H	234.061	1.33183e-06	0	0	3.44148e-06	1.05878e-06	2.74658e-06	1.42978e-06	1.41539e-06	2.09051e-06	1.57856e-06	0.000261299	0	9.82351e-05	0.000247551	0.000178429	0.000121596	0.00096936	0	1.01435e-05	0	6.92583e-05	0.000119845	0.000182525	0.000326501	3.46292e-05	0.000165875	0.000123048	0.000237125	0.000340222	2.94591e-06	1.0859e-06	2.0159e-06	1.31522e-06
1058	C12H11NO4H	234.076	2.20816e-06	0	2.31918e-06	1.63225e-06	3.50772e-06	1.84318e-06	1.91842e-06	1.14353e-06	2.02963e-06	7.90404e-07	0.000388746	1.49771e-05	1.55392e-05	0.000292866	0.000104761	0.000232033	0.00536261	0	0	0	0	0.000139754	0.000209886	0.00178754	0	0.000534294	0.000840038	0.000948094	0.00195586	0	6.13622e-07	3.06811e-07	4.33896e-07
1059	C9H15NO6H	234.097	4.74634e-07	0	2.73887e-07	0	0	3.91797e-08	1.31283e-07	1.99206e-07	7.26047e-08	1.39624e-07	0.0009502	6.25716e-05	0.000188659	9.89917e-05	0	0	0.00429262	0.000172434	0.000131155	0	0	0.000400477	3.29972e-05	0.00153207	0	0.000491386	0.000717139	0.000948197	0.00155535	0	0	0	0
1060	C13H15NO3H	234.112	3.03173e-06	0	2.22415e-06	1.05468e-06	1.34809e-06	2.18513e-06	1.64063e-06	1.06703e-06	1.50989e-06	6.70197e-07	0.00138951	5.95205e-05	7.59321e-05	0.00026501	0	0	0.00135898	0	2.7571e-05	0	5.72765e-05	0.000508322	8.83367e-05	0.000462184	2.86383e-05	0.00027187	0.000248311	0.000563181	0.000711987	0	3.43436e-06	1.71718e-06	2.42846e-06
1061	C10H19NO5H	234.134	4.53895e-06	8.23686e-06	1.64991e-05	1.51782e-05	2.02004e-06	6.07235e-06	8.75758e-06	5.86223e-06	1.13592e-05	6.1352e-06	0.00105119	0.000389267	5.37202e-05	0.000794898	0.000240372	0.000268576	0.0072012	0	1.05308e-05	0	0	0.000498058	0.000434615	0.00240391	0	0.000834146	0.00106966	0.001476	0.00258391	0	0	0	0
1062	C14H19NO2H	234.149	8.30794e-07	2.1145e-06	1.00359e-05	4.45333e-06	9.34e-06	3.34318e-06	5.01962e-06	3.81958e-06	5.88915e-06	3.02765e-06	0.000718978	0.000577062	0.00010379	0.000224829	0	0.0001393	0.000156611	0	0.0001135	0.00016722	4.29641e-05	0.00046661	0.000121376	9.00371e-05	0.000105092	0.000195779	0.000181007	0.000326439	0.000311487	0	0	0	0
1063	C11H23NO4H	234.17	4.91336e-06	2.34395e-06	4.64883e-06	3.73152e-06	6.71684e-06	9.66833e-06	5.33714e-06	2.56333e-06	5.25821e-06	2.18794e-06	0.0005216	0.00014926	0	0	0	0	0.00647281	0	7.88427e-05	0.000180158	3.87099e-05	0.00022362	0	0.00218389	0.000109434	0.000629235	0.00104045	0.0011812	0.00235724	0	5.26064e-06	2.63032e-06	3.71983e-06
1064	C15H23NOH	234.185	4.77666e-06	3.51128e-07	0	3.22419e-06	4.24282e-06	2.94819e-06	2.5905e-06	1.98819e-06	2.64039e-06	1.50434e-06	0.0037433	0.00108128	7.00439e-05	0.00503716	0.000734169	0.000410906	0.00724216	0.000199904	3.79308e-05	0.000945642	0	0.00163154	0.00206075	0.00249333	0.000472821	0.00166461	0.000868937	0.00244417	0.00266398	5.2289e-06	6.84989e-06	6.0394e-06	1.14621e-06
1065	C16H27NH	234.222	4.79105e-05	3.57249e-05	2.79434e-05	2.1257e-05	1.38829e-05	1.27378e-05	2.65761e-05	1.35767e-05	2.15292e-05	9.18051e-06	0.0049085	0.00108482	5.13459e-06	0.0119951	0.00335214	0.00241427	0.0360397	0	0.000537781	0.00538845	0	0.00199948	0.00592052	0.0121925	0.00269423	0.00570168	0.00465223	0.0077908	0.0126329	3.16899e-05	7.50691e-05	5.33795e-05	3.06738e-05
1066	C13H14O4H	235.096	7.232e-05	1.37226e-05	6.77507e-05	0.000369849	0.000166956	0.00032463	0.000169205	0.000147156	0.000248863	0.000155493	0.00112617	0	0.000297426	0	0	0	0	5.20576e-05	0.00206966	0	0	0.000474531	0	0.00070724	0	0.000295443	0.000354129	0.000391832	0.000608086	0	7.74219e-06	3.8711e-06	5.47456e-06
1067	C14H18O3H	235.133	0.000145489	0.000186315	0.000334123	0.000214247	3.88947e-05	8.5977e-05	0.000167508	0.000103896	0.000186914	9.92161e-05	0.0115096	0.00186574	0.000142119	0.00232599	0	0.000974517	0.0144511	0.000600415	0	0	0	0.0045058	0.00110017	0.00501718	0	0.00265579	0.00248139	0.0054099	0.00652069	0	2.0322e-05	1.0161e-05	1.43698e-05
1068	C15H22O2H	235.169	0.000168977	0.000200587	0.000267505	0.00018733	8.49426e-05	0.000204109	0.000185575	5.94758e-05	0.000189463	5.40322e-05	0.0306101	0.00399502	0.000293154	0.00641309	0	0.000100936	0.0340676	0.0031471	5.66476e-05	0.0054184	0	0.0116328	0.00217134	0.0124238	0.0027092	0.00723427	0.00554939	0.0140504	0.0159606	0	0.000128379	6.41896e-05	9.07779e-05
1069	C16H26OH	235.206	7.43562e-05	0.000128913	5.6268e-05	0.000201716	0.000100832	0.000102024	0.000110685	5.11311e-05	0.000135849	6.45641e-05	0.113163	0.0314918	0.000665701	0.096689	0.0169904	0.0101504	0.184417	0.00457422	0.00103636	0.0117043	0.000949308	0.0484401	0.0412766	0.0633425	0.00632683	0.0398465	0.0241628	0.0652502	0.0716906	0	0.00021179	0.000105895	0.000149758
1070	C17H30H	235.242	0.000632383	0.00103689	0.00198789	0.00219201	0.000561461	0.000681277	0.00118199	0.000725052	0.00156893	0.000815995	0.653327	0.270816	0.0115064	0.632402	0.248796	0.0899755	1.47068	0.0233694	0.0194708	0.218146	0.0187982	0.311883	0.323725	0.504505	0.118472	0.314646	0.157714	0.473299	0.517697	0.00162205	0.00220524	0.00191364	0.000412378
1071	C11H9NO5H	236.055	1.33153e-05	1.60007e-05	4.6641e-06	2.6561e-05	6.55557e-06	1.69109e-05	1.40013e-05	7.91584e-06	1.69243e-05	9.68306e-06	0.000276177	0.000122297	6.40731e-06	0.00024022	0	1.82416e-05	0	5.61241e-06	0.00021735	0	0	0.00013496	8.61539e-05	7.43207e-05	0	7.38587e-05	5.5797e-05	0.000104099	0.000119592	6.61992e-06	5.71889e-06	6.1694e-06	6.37122e-07
1072	C12H13NO4H	236.092	8.40611e-06	1.02851e-05	1.09027e-05	2.41197e-05	5.11182e-06	1.3548e-05	1.20623e-05	6.53865e-06	1.59313e-05	8.39003e-06	0.00142476	0.000161327	0	0.000309448	0	8.26496e-05	0.00122259	9.1488e-05	0.000356936	0	0.000270471	0.000528694	0.000130699	0.000557005	0.000135235	0.000337909	0.000236935	0.000606373	0.00065403	0	0	0	0
1073	C13H17NO3H	236.128	1.99045e-05	1.97284e-05	2.92038e-05	3.71954e-06	4.14544e-06	5.43901e-06	1.36901e-05	1.07177e-05	1.01244e-05	1.07523e-05	0.00447985	0.00103217	4.75931e-05	0.000736013	0	0	0.00449052	0.000279675	3.97524e-07	0	0	0.0018532	0.000245338	0.0015902	0	0.000922184	0.000934805	0.00197792	0.0022837	0	0	0	0
1074	C14H21NO2H	236.165	1.5173e-05	2.108e-05	3.46106e-05	2.14882e-05	2.48348e-06	1.01488e-05	1.74973e-05	1.10132e-05	1.90986e-05	1.03255e-05	0.00206287	0.000595196	6.75744e-05	0.00115423	0.000147365	0.000303104	0.00296853	3.15111e-05	0.000172923	0	0	0.000908545	0.000534898	0.00105765	0	0.000625274	0.000471286	0.00110242	0.00121713	0	0	0	0
1075	C15H25NOH	236.201	7.56355e-06	3.64298e-06	1.06158e-05	8.2457e-06	6.74374e-06	6.01542e-06	7.13787e-06	2.32956e-06	7.89417e-06	1.89887e-06	0.0034695	0.00109245	7.33035e-05	0.00314815	0.000782925	0.00059818	0.00714745	8.90988e-05	0.000154572	0.000616479	0.000178055	0.00154508	0.00150975	0.00246371	0.000397267	0.00147895	0.000845597	0.00230183	0.00259082	0	1.27566e-05	6.37831e-06	9.0203e-06
1076	C16H29NH	236.237	4.72499e-05	4.56913e-05	5.37528e-05	9.68721e-05	1.2715e-05	1.99115e-05	4.60321e-05	2.97934e-05	5.99518e-05	3.72404e-05	0.00981084	0.0040781	0.000204578	0.014816	0.00425345	0.00193383	0.0266756	0.000416996	0.000449931	0.00521583	0.000135124	0.00469784	0.0070011	0.00918083	0.00267548	0.00588881	0.00281771	0.00812961	0.00917474	2.33289e-05	5.01009e-05	3.67149e-05	1.89306e-05
1077	C12H12O5H	237.076	3.92982e-05	2.85814e-05	4.18438e-05	8.15673e-05	6.85525e-05	8.72292e-05	5.78454e-05	2.44835e-05	6.91916e-05	2.20914e-05	0.00050955	0	0	0	0	0	0	0	0.000433007	0	0	0.00016985	0	0.000144336	0	7.85464e-05	9.12937e-05	0.000139356	0.00023158	5.32523e-06	1.77508e-06	3.55015e-06	2.51034e-06
1078	C13H16O4H	237.112	0.000168173	0.000510411	9.85799e-05	0.000147346	0.000111843	0.000835131	0.000311914	0.000298811	0.000255772	0.0002666	0.00399152	0.000255042	0.000464294	2.57152e-05	0	0	0.00110136	0.000433533	0	0	0	0.00157028	8.57173e-06	0.00051163	0	0.000522622	0.000738264	0.00122625	0.00170643	0	4.29259e-05	2.1463e-05	3.03532e-05
1079	C14H20O3H	237.149	0.000132714	0.000196355	0.000244127	0.000173662	3.856e-05	8.6872e-05	0.000145382	7.50245e-05	0.000152631	6.79405e-05	0.0128422	0.00327536	0.000106513	0.00157682	0	0.00255075	0.0181439	0.00258225	0.00116323	0.000215178	0.00162035	0.00540803	0.00137586	0.00729645	0.000917766	0.00374952	0.00310829	0.00695618	0.00739798	0	6.50466e-05	3.25233e-05	4.59949e-05
1080	C18H20H	237.164	0.000298667	0.000378976	0.000565393	0.000291655	3.01488e-05	0.000126932	0.000281962	0.000188447	0.000282227	0.000171247	0.026548	0.0107063	0.000236998	0.0137441	0	0.00953872	0.083149	0.00482607	0.00118703	0	4.58721e-05	0.0124971	0.00776095	0.0297207	2.29361e-05	0.0125004	0.0125789	0.0221857	0.0296459	0	0.000171263	8.56317e-05	0.000121102
1081	C15H24O2H	237.185	0.000143594	0.000136149	0.000165237	0.000146914	3.86205e-05	8.60234e-05	0.000119423	4.76723e-05	0.000123691	4.39693e-05	0.0512369	0.00839536	0.0010481	0.0175235	0	0.00210618	0.0738625	0.0034482	0.00029592	0.00673895	0	0.0202268	0.00654322	0.0258689	0.00336947	0.0140021	0.0107743	0.0263517	0.0307651	0	0.00014359	7.17952e-05	0.000101534
1082	C16H28OH	237.221	0.000101932	0.000127837	9.31134e-05	0.000227944	3.97819e-05	6.41811e-05	0.000109132	6.57339e-05	0.000139534	8.43863e-05	0.160207	0.0431085	0.000640511	0.122775	0.0155784	0.0117922	0.266893	0.00661261	0.00143378	0.0183731	0.000395392	0.0679854	0.0500484	0.0916463	0.00938425	0.0547661	0.0347211	0.0924684	0.103752	3.35677e-05	0.000327807	0.000180687	0.000208059
1083	C17H32H	237.258	0.000717577	0.000836032	0.0019485	0.00221948	0.00051745	0.000728567	0.00116127	0.000727175	0.0015671	0.000835417	0.548969	0.218284	0.00481436	0.455392	0.160315	0.0585803	1.20121	0.0210307	0.0121193	0.1309	0.00656488	0.257356	0.224763	0.411454	0.0687327	0.240576	0.140548	0.38284	0.430981	0.00187568	0.00265267	0.00226418	0.000549409
1084	C10H7NO6H	238.035	1.76874e-05	2.18445e-05	1.31857e-05	7.28612e-06	9.15968e-06	8.19802e-06	1.28936e-05	5.84154e-06	9.81045e-06	4.82026e-06	0.000231326	0	6.01052e-05	0.000135489	0.000236543	8.82085e-05	0.000441647	0	0.0001025	0.000119391	0	9.71437e-05	0.000153413	0.000181382	5.96955e-05	0.000122909	5.48009e-05	0.0001499	0.000157408	1.89196e-05	2.33704e-05	2.1145e-05	3.14714e-06
1085	C11H11NO5H	238.071	7.40023e-06	8.93211e-06	1.01568e-05	2.6329e-06	6.66492e-06	3.87263e-06	6.60993e-06	2.89517e-06	5.31093e-06	3.24723e-06	0.000984468	8.27799e-05	2.10503e-05	0.000266313	0	1.68686e-05	0.00236266	0.000142105	0.000121452	5.68064e-05	0.000520822	0.000362766	9.43939e-05	0.000875405	0.000288814	0.000405345	0.000333186	0.000685135	0.000857152	0	0	0	0
1086	C12H15NO4H	238.107	6.10744e-05	0.000103559	7.13936e-05	2.36395e-05	5.7803e-06	7.77349e-06	4.55367e-05	3.94023e-05	3.22694e-05	3.08989e-05	0.00239059	0.000435892	4.31265e-05	0.000452079	0	0.000240653	0.000332153	2.80535e-05	0.000193597	0.000109765	0.000696972	0.000956538	0.000230911	0.000184601	0.000403368	0.000443855	0.000354514	0.000767613	0.000964079	0	0	0	0
1087	C13H19NO3H	238.144	5.02256e-05	9.06021e-05	8.29793e-05	2.92846e-05	6.17398e-06	1.17634e-05	4.51715e-05	3.58e-05	3.66502e-05	2.96873e-05	0.00385322	0.000730476	0	0.000962184	0	0	0.00620077	0.000190408	0	0	0	0.0015279	0.000320728	0.00213039	0	0.000994755	0.00100296	0.00204105	0.00255319	0	1.1187e-05	5.59352e-06	7.91043e-06
1088	C14H23NO2H	238.18	1.60847e-05	2.71455e-05	5.23468e-05	3.70726e-05	1.77096e-05	2.03498e-05	2.84515e-05	1.4007e-05	3.33384e-05	1.31636e-05	0.0022018	0.000492042	5.38972e-06	0.00179489	0.000240707	0.000622667	0.00536295	0.000172915	2.88856e-05	0	0	0.000899744	0.000886089	0.00185492	0	0.000910188	0.00075755	0.00152028	0.0019589	0	0	0	0
1089	C15H27NOH	238.217	1.26074e-05	5.3063e-06	2.41805e-05	2.10943e-05	1.35533e-05	8.09784e-06	1.41399e-05	7.29944e-06	1.75457e-05	7.00607e-06	0.00291628	0.000766292	5.70062e-05	0.0027597	0.00022761	0.000126426	0.00478959	0.00010365	0.000100884	0.000751036	0.000213843	0.00124652	0.00103791	0.00166471	0.000482439	0.0011079	0.000491715	0.00172853	0.00182284	1.61795e-06	1.42601e-05	7.93902e-06	8.93934e-06
1090	C16H31NH	238.253	6.71279e-05	4.78677e-05	6.66628e-05	0.000108435	2.34969e-05	1.62148e-05	5.49674e-05	3.37223e-05	6.91206e-05	4.04083e-05	0.00552042	0.00199798	7.52688e-05	0.0061632	0.00115799	0.000457887	0.0138816	7.38971e-05	0.000105766	0.00258191	0.000250506	0.00253122	0.00259302	0.00468708	0.00141621	0.00280688	0.00136514	0.00421145	0.0048747	2.07104e-05	5.98927e-05	4.03015e-05	2.7706e-05
1091	C12H14O5H	239.091	3.43965e-05	2.388e-05	0.000252988	5.93531e-05	0.000110467	4.63292e-05	8.79022e-05	8.63336e-05	9.98772e-05	7.85353e-05	0.00116676	0.000142352	0.000179116	0.000217519	5.39514e-05	0.000421215	0	0	0.000394651	0	0	0.000496075	0.000230895	0.00013155	0	0.00021463	0.000210114	0.000338488	0.000481586	4.41598e-05	1.47199e-05	2.94399e-05	2.08171e-05
1092	C13H18O4H	239.128	5.85463e-05	0.000107274	0.000124355	0.000100537	4.83864e-05	7.13374e-05	8.50727e-05	3.00444e-05	9.15612e-05	2.60144e-05	0.00630786	0.000399622	0.000101926	0.000457339	0	0.000773532	0.00608305	0.000946643	0	0	0	0.0022698	0.00041029	0.00234323	0	0.00125583	0.0012251	0.00262205	0.00318415	0	6.5052e-07	3.2526e-07	4.59987e-07
1093	C14H22O3H	239.164	0.000309651	0.000509327	0.000614172	0.00036665	5.91821e-05	0.000201376	0.000343393	0.000201732	0.000345598	0.000176362	0.026007	0.00710019	0.000366058	0.00958291	0.00134215	0.00815349	0.0635282	0.00382268	0.000621649	0	0	0.0111578	0.00635952	0.0226575	0	0.0100437	0.00957076	0.0181084	0.0232549	0	8.47844e-05	4.23922e-05	5.99516e-05
1094	C18H22H	239.179	0.000516259	0.00169844	0.00138944	0.000524795	5.7805e-05	0.000214614	0.000733559	0.000659988	0.000622427	0.000506119	0.057859	0.0280596	0.000372687	0.0576048	0.000764797	0.016738	0.197152	0.00670939	0.000459678	0.000476842	0.000519908	0.0287638	0.0250358	0.0681071	0.000498375	0.0306013	0.0279716	0.0519255	0.0698058	0	0.000533883	0.000266941	0.000377512
1095	C15H26O2H	239.201	0.000135963	0.000243191	0.000326644	9.8182e-05	2.92419e-05	0.000108605	0.000156971	0.00010842	0.000140436	0.000100982	0.0644995	0.0064685	0.000241844	0.0284301	0	0.00423424	0.0952073	0.00275676	0.000474089	0.0012168	0.000298961	0.0237366	0.0108881	0.0328127	0.000757881	0.0170488	0.0141017	0.0322828	0.0400644	0	0.00023085	0.000115425	0.000163235
1096	C16H30OH	239.237	0.000332791	0.000128477	0.000166368	0.000304197	6.77112e-05	6.41033e-05	0.000177274	0.000116281	0.000197191	0.000107403	0.207843	0.0592813	0.000907908	0.154725	0.0238061	0.0172569	0.340855	0.00718867	0.00112476	0.00127207	0	0.089344	0.0652625	0.11639	0.000636035	0.067908	0.0494721	0.117973	0.134593	0	0.001781	0.000890498	0.00125935
1097	C17H34H	239.273	0.00639003	0.0049063	0.00314587	0.00645359	0.000494082	0.00152811	0.00381966	0.00250958	0.00406855	0.00240968	0.763904	0.302437	0.00646709	0.648205	0.217959	0.0688692	2.12735	0.0229754	0.0160922	0.222301	0.00659191	0.357603	0.311678	0.722138	0.114446	0.376466	0.253441	0.605875	0.750345	0.00234371	0.00433192	0.00333781	0.00140588
1098	C9H5NO7H	240.014	4.51032e-05	0	4.20113e-06	3.94854e-05	1.57407e-05	7.1571e-05	2.93502e-05	2.76138e-05	3.24264e-05	2.26869e-05	4.50895e-05	0	6.95756e-06	0.000358642	0	0	0.0212098	0	0	0	0	1.7349e-05	0.000119547	0.00706994	0	0.00180171	0.00351255	0.00335092	0.00786149	0	0	0	0
1099	C10H9NO6H	240.05	1.65651e-05	1.38752e-05	2.49249e-05	5.31989e-06	1.80765e-05	1.56962e-05	1.57429e-05	6.3649e-06	1.33608e-05	7.95573e-06	0.00015457	0	0	0.000205816	0	8.22532e-05	0.00507547	0	0.000251403	0	0.000164697	5.15234e-05	9.60231e-05	0.00177563	8.23487e-05	0.00050138	0.000849701	0.000863157	0.00185528	0	2.36105e-06	1.18053e-06	1.66951e-06
1100	C11H13NO5H	240.087	1.07293e-05	7.299e-06	3.04192e-05	1.12151e-05	1.45934e-05	1.29257e-05	1.45303e-05	8.15802e-06	1.54785e-05	7.48835e-06	0.000723199	3.63659e-06	0	0.000123031	0	0	0.0102134	0	0.000198013	0.000244357	0.000591056	0.000242278	4.10102e-05	0.00347047	0.000417706	0.00104287	0.0016257	0.0018418	0.00371144	1.39456e-05	8.858e-06	1.14018e-05	3.59747e-06
1101	C12H17NO4H	240.123	1.01381e-05	1.87369e-05	2.45653e-05	2.68067e-05	7.75976e-06	1.89278e-05	1.78224e-05	7.59667e-06	2.13553e-05	7.78658e-06	0.00143987	0.000100975	8.96537e-05	0.000602772	0.000436258	0.000378907	0.0101311	0	1.37845e-05	0	7.89994e-05	0.0005435	0.000472646	0.00338161	3.94997e-05	0.00110932	0.00153116	0.0019836	0.00366624	0	1.20063e-06	6.00316e-07	8.48975e-07
1102	C13H21NO3H	240.159	3.1287e-05	5.25339e-05	0.00011149	4.96453e-05	9.37314e-06	3.41541e-05	4.80806e-05	3.4691e-05	5.24215e-05	3.22461e-05	0.00227272	0.000190076	0	0.00203454	0	0.000306951	0.0144961	0	0.000104166	0	0	0.000820932	0.000780498	0.00486675	0	0.00161704	0.00219917	0.00289908	0.00524854	0	1.05545e-05	5.27726e-06	7.46318e-06
1103	C14H25NO2H	240.196	2.02102e-05	2.80271e-05	6.31782e-05	2.90604e-05	5.8146e-06	1.29363e-05	2.65378e-05	2.00279e-05	2.91823e-05	1.8851e-05	0.00218647	0.000199012	2.32694e-06	0.00272258	0.000347444	0.000842481	0.0133266	0	2.00657e-05	3.5715e-05	0	0.000795935	0.00130417	0.00444889	1.78575e-05	0.00164171	0.00194478	0.00272713	0.00479081	0	1.01908e-05	5.09539e-06	7.20597e-06
1104	C15H29NOH	240.232	1.34732e-05	3.45838e-06	9.75408e-06	2.56273e-05	3.16801e-06	2.01313e-06	9.58235e-06	9.03934e-06	1.41149e-05	1.12591e-05	0.00275793	0.000282548	0	0.00330445	3.56938e-05	2.63947e-05	0.0110889	0	0.000122635	0.00066679	0	0.00101349	0.00112218	0.00373718	0.000333395	0.00155156	0.0014983	0.00257051	0.00398026	0	7.96232e-06	3.98116e-06	5.63021e-06
1105	C16H33NH	240.269	6.59365e-05	5.9241e-05	6.3876e-05	0.000128258	1.37888e-05	3.31652e-05	6.0711e-05	3.88911e-05	7.86084e-05	4.89831e-05	0.00200408	0.000551032	0.000134057	0.00314333	0.00126451	0.000983443	0.0225149	0	0.000389947	0.002631	0.000410006	0.000896391	0.0017971	0.00763495	0.0015205	0.00296223	0.00313784	0.00444803	0.00798632	3.91741e-05	5.67801e-05	4.79771e-05	1.24493e-05
1106	C11H12O6H	241.071	2.35305e-05	0	6.77613e-05	1.29218e-05	6.95826e-05	3.60419e-05	3.4973e-05	2.86857e-05	3.54591e-05	2.56165e-05	0.0019174	0.000705166	0.000230834	0.00056432	3.94008e-05	0.000856912	0	0.000122172	0	0	0	0.000951134	0.000486878	4.0724e-05	0	0.000369684	0.000445982	0.000622324	0.000796301	0	3.98488e-05	1.99244e-05	2.81774e-05
1107	C12H16O5H	241.107	0.000177374	0.00045125	0.000136153	4.03185e-05	3.02051e-05	2.5434e-06	0.000139641	0.000166837	7.38277e-05	0.000115591	0.0036491	0.000145762	0.000123401	0	0	0	0.00259031	0.000113805	0.000602659	0	0.00080111	0.00130609	0	0.00110226	0.000400555	0.000702225	0.000607947	0.00138401	0.00165777	0	2.28608e-05	1.14304e-05	1.6165e-05
1108	C13H20O4H	241.143	0.000176417	0.000399613	0.000155521	0.000138318	2.96525e-05	1.79859e-05	0.000152918	0.000137864	0.000119125	8.94849e-05	0.00631477	0.0011676	5.20953e-05	0.00123712	0	0.00111998	0.00106921	0.00048773	0.000733531	0	0.000791237	0.00251149	0.000785699	0.000763489	0.000395618	0.00111407	0.000948629	0.00202959	0.00254987	0	0	0	0
1109	C14H24O3H	241.18	7.3041e-05	5.34635e-05	9.08037e-05	5.88038e-05	5.63682e-05	9.87451e-05	7.18709e-05	1.91414e-05	7.08972e-05	1.74653e-05	0.0420016	0.0142765	0.000373017	0.0280214	0.000356325	0.00707277	0.0919879	0.00524054	0.000114316	0	0	0.0188837	0.0118168	0.0324476	0	0.015787	0.0135666	0.0281559	0.034024	5.57809e-06	0.000179109	9.23434e-05	0.000122705
1110	C18H24H	241.195	0.000124018	0.000115291	0.0003453	0.000218672	8.12195e-05	0.000154214	0.000173119	9.62074e-05	0.000204171	9.0151e-05	0.0628112	0.0336761	0.000296561	0.0493504	0.000430612	0.0172635	0.295691	0.00920489	0.000133895	0.00249813	0	0.0322613	0.0223482	0.101677	0.00124906	0.0393838	0.0434956	0.0696593	0.104797	0.000532492	0.000988596	0.000760544	0.000322514
[truncated: 418 more rows]

## Sheet: EF_mg_kg_fuel
Emission Factor (mg·kgfuel-1)
Number	Ion formula (H+)	Fuel type	Gasoline Vehicles										LDDT			MDDT			HDDT			Bus		LDDT	MDDT	HDDT	BUS	Diesel Vehicles				LPG Vehicles
[truncated: 1,530 more rows]

## Sheet: ER_ppb_ppm
Emission ratio to CO (ppb·ppm-1)
[truncated: 1,531 more rows]
